# Supplementary material for: Identifying the Genome-Wide Sequence Variations and Developing New Molecular Markers for Genetics Research by Re-Sequencing a Landrace Cultivar of Foxtail Millet
Source: PLoS One. 2013 Sep 10;8(9):e73514. doi: 10.1371/journal.pone.0073514 (PMC3769310; doi:10.1371/journal.pone.0073514)
Supplement: Table S6 — The list of the INS and DEL variations with 100- to 400- bp in length identified between SLX and Yugu1. (XLS) [file pone.0073514.s011.xls]

## Sheet: table S6
Table S6 The list of the INS and DEL variations with 100- to 400- bp in length identified between SLX and Yugu1.
Accession No.	Type	Chromosome	Start	End	Compared sequence	Predicted length (bp)
pD0	DEL	Chr1	46306	46660	GCATCCCCACGTTTTCGACCTCGGTGGCCGGTGTCGCAGTTTTCGGGCTCCCGTGATCTATAGCACACGTTATCATAGCTGAAAACGGGTCTAGAGGTTATTTTAACGTCTTTAGTCGTCCCCACATTTTCGACCCCGGTGCCGGTGCGGCTGATTTCGAGCTCCCGTGAGCTGTATCAGAAGTTTTATGGCCGAAAACACATCCAGAGGGCATTTTCACGTCTTCAGTCCATCCCCCACGTTTTTGACCCCAGTGGCCGGTGTGGCCGTTTTCAGGCTCCCGTGATCTTTAGCACATGTTTTCATGGCTGAAATTGCGTCCGGAGGTTATTTTCACATCTTCAGTCCATCCCC	346
ba2	DEL	Chr1	303249	303492	TGCCAAATTACTGTTACAGCACTGTAGCACACTGTAGCGTTTCGTTTGTATTTGTGAATTATTGTCCAAATATTGACTAATTAGGCTCAAAAGATTCGTCTCGCAAAGTACAACAAAACTGTGCAATTAGTTTTTAATTTCATCTACATTTAGTACTCCATGCATGTACCGCAAGTTTGATGTGATGGGGAATCTTCTTTTTGCATAGTGTCAAAGTTGGGAGTTGGGAGTAACTAAACATGG	280
ba8	DEL	Chr1	829011	829221	GTGTGTTTGGTTGCATGCACCACATGATGCATGTATGGATGATCCTGGATGGGATGGTTCAACCAATTTGCTTGAGTTGGTTCAATTCACCCAACCAAACAAAAGGATCATTATTATTTTGAATCATTTCATACATGAATCAAATGATACAACCAACCAAACGCACCCTTAGTGACTAGTTCAGACCATTTTTGTTTAGCTCAATTTCCC	184
ba10	DEL	Chr1	831660	831881	CTATGGCCTTGTTTAGTTGTCCAACTTTGGGGTGCCCAAATTACTGTAGCAACACTGGAGCGTTTCGTTTGTATTTGTGAATTATTGTCCAAATATTGACTAATTAGGCTCAAAAGATTCGTCTCGCAAAGTACAACAAAACTGTGCAATTAGTTTTTGATTTCGTCTACATTCAGTACTCCATGCATGTACCGCAAGTTTGATATGATGGGGAATCTTCT	290
ba13	DEL	Chr1	1381988	1382323	CTGACTTATTTTTAGCACCCATCACATCGAATGTTTAGATACTAATTAGGAGTATTAAACGTAAACTATTTATAAAACCCATTACATAAGACGAATCTAAACGGCGAGATGAATCTATTAAACCTAATTAGTCCATGATTTGACAATGTGTTGCTACAGTAAATATTTGCTAATGATAGATTAATTAGGCTCAATTAGGCTTAATAGATTCGTCTCGCCGTTTAGATTCCACTTATGTAATTGGTTTTGTAAATAGTCTACGTTTACTACTCCTAATTAGTATCTAAACATTCGATGTGACACGTGCTAAAAATAAGACACGGGAAGAAAACGCC	358
ba15	DEL	Chr1	1554434	1554789	CCGTACAAGCTATGGGGGTGTTTGGGAACACCTTGTTAAAGTTTAACACCTGTCACATCGGATGTTTGGATGCTAATTAGGAGTATTAAACATAGACTAATTACAAAACTAATTACACAGATGGAGTATAATTCGCGAGACGAATCTATTAAACCTAATTAGTCTATGATTTGACAATGTGGTGCTACAGTAACCATTTGCTAATGATGGATTAATTAGGCTTAATAGATTCGTCTAGCGAATTAGCACAGGGTTCTGCAATTAGTTTTATAATTAGCTCATGTTTACTCTCCTAATTAGCATCCGAACATCCGATGTGACACTGTTAAAGTTTAGCACCTCGTATCCAAACAGC	353
ba17	DEL	Chr1	1755829	1756195	ACCGGTGGCCCCTAGTACTCCCTTGTTTGCATCTTTGGCCATGTTTAGTTACTCCCAACTCCCAACTTTGACACTATGCAAAAAGAAGATTCCCCATCACATCAAACTTGCGGTACATGCATGGAGTACTAAATGTAGATGAAATTAAAAACTAATTGCACAGTTTTGTTGTACTTTGCGAGACGAATCTTTTGAGCCTAATTAGTCAATATTTGGACAATAATTCACAAATACAAACGAAACGCTACAGTGTGCTACAGTGCTGTAACAGTAATTTGGCACCTTCCAAATTCCCCAACTAAACACGGCCTTTTTGTTCTTTTGAGGAAGCAAGACATGTGGTACGCTACGCCCCCCAGCCCCGGT	270
ba21	DEL	Chr1	1999417	1999681	CCCAACTCCCAACTTTGACACTATGCAAAAAGAAGATTCCCCATCACATCAAACTTGCGGTACATGCATGGAGTACTAAATGTAGATGAAATTAAAAACTAATTGCACAGTTTTGTTGTATTTTGCGAGACGAATCTTTTGAGCCTAATTAGTCAATATTTGGACAATAATTCACAAATACAAACGAAACGCTACAGTGTGCTACAGTGCTGTAACAGTAATTTGGCACCTCCCAAATTCCCCAACTAAACAAGGCCTTACTGT	265
ba22	DEL	Chr1	2016293	2016628	TGGATACGAGGTGTTAAACTTTAACAGTGTCACATCGGATGTTCGGATACTAATTAGGTGCACTAAACATGAGCTAATTATAAAACTAATTGCAGAACCCTGTGCTAATTTGCGAGACGAATCTATTAAGCCTAATTAATCCATCATTAGCAAATGGTTACTGTAGCACCACATTGTCAAATCATGGACTAATTAGGCTTAATAGATTCGTCTCGCGAATTATACTCCATCTGTGCAATTAGTTTTGTAATTAACCTATGTTTAATACTCCTAATTAGCATCCAAACATCCGATGTGATAGGTGTTAAACTTTAACAGGGTGTTCCCAAACACCC	358
ba27	DEL	Chr1	2495160	2495554	AATAACCAAAAAAATAGAAATTTCATATTGCAACTATTCTACCTTAGAGCATTGCAGGCCATCTTACTAATGATCTAGGCAACCCTATGTACAGGTCAAGCAAGTAGTGTTCGCAATTGCATGTTATGCATAGGATTAGGGAAAAAATCAATTCATAGAAATGTTATAGATCATCTCCTACATGGCTAGAATTGGCACTTGCTGTCAATCTCATCAGTGAGTTTGGTACAAGTGACCCAGTCATCCTGATCAATATGATCTTAGATGGAGGTTTCACGAATCAATTACTAATTACTCTTCTCAATTCAGTGTACTCTTCTCATTCGATTTGCTGTCGACCTGTCTAGGAACCAAATGTTTCCTCATCTAGCAGCCACTTGTAAGCCTCATGGGC	355
pD50	DEL	Chr1	2498869	2499152	TCCTAGGCCGTGTTTAGTTGGGGAATTTGGGAGGTGCCAAATTACTGTTAGAGCACTGTAGCACACTGTAGCGTTTCGTTTGTATTTGTGAATTATTGTCCAAATATTGACTAATTAGGTTCAAAAGATTCGTCTCGCAAAGTACAACAAAACTGTGCAATTAGTTTTTAATTTCATCTACATTTAGTACTCCATGCATGTACCGCAAGTTTGATGTGATGGGGAATCTTCTTTTTGCATAGTGTCAAAGTTGGGAGTTGGGAGTAACTAAACATGGCCCTAG	277
pD56	DEL	Chr1	2644405	2644688	TCAGGCCGTGTTTAGTTGGGGAATTTGGGAGGTGCCAAATTACTGTTACAGCACTGTAGCACACTGTAGCGTTTCGTTTGTATTTGTGAATTATTGTCCAAATATTGACTAATTAGGCTTAAAAGATTCGTCTCGCAAAGTACAACAAAACTGTGCAATTAGTTTTTAATTTCATCTACATTTAGTACTCCATGCATGTACCGCAAGTTTGATGTGATGGGGAATCTTCTTTTTGCATAGTGTCAAAGTTGGAAGTTGGGAGTAACTAAACATGGCCTCACAG	279
ba33	DEL	Chr1	2652819	2652942	ATGGAATGTTCGTGATCAATTCAGCCAGGTTTCGAGTGGGCTGACGTTTTAAGGCCGTCCTGGGCTCTGCATTCGCTTCAGCTTATTCAGCCGGCTTATCAGCCACCGAACAGTGTTTTTCTC	109
ba37	DEL	Chr1	2726590	2726948	TGTTTGGGAAACACCTGTTAAAGTTTAACACCTGTCACATCGGATGTTTGGATGCTAATTAGGAGTACTAAACATAAGCTAATTACAAAACTAATTGCACAGATGGAGTATAATTCGCGAGACGAATCTATTAAGCCTAATTAGTCCATGATTTGACAATGTGGTGCTACAGTAACCATTTGCTAATGATGGATTAATTAGGCTTAATAGATTCGTCTCGCGAATTAGCACAAGGTTCTGCAATTAGTTTTATAATTAGCTCATGTTTAGTCCTCCTAATTAGCATCCAAACATCCGATGTGACACTGTTAAAGTTTAGCACCTCGTATCCAAACAGCCCCTTAATTTGTCTCTTCAG	357
ba39	DEL	Chr1	2858117	2858257	GCGCTCACACATTCAAAGGGCCTGTTCGCTTCAGCTTATAAGCCGGCTGAAAAGCTGAAACGGCTGATTTGTTGTGAGAGGAAAACACTGTTTGGTGGCTGATAAGCCGGCTGAATAAGCTGAAGCGAACAGGCCCAAAA	125
ba40	DEL	Chr1	3052702	3053245	TTTATAATCCCAATTCCAGTTTCTATTGAATTTGGTAGAGCAAACCTCAGCTGCAAAGTAAATGTCGCCAATAAATTAGTGAACAATGGCCTCACATAATTTATTGTTTAGAACTTTGACCTTCATCTCGCACTCTGCAGCACAATTTTGAATGGCCTTGTTCTTAGAACCAGCGGGTACTAGAACTTCTTCATCTGGGAATTTTCAACGCCTCCCAACTATTGTAGAAAAAATCCTTCCACAATTATCAGTATACTGACTAGCTCACTGATCCAAAATTTAAATAAATTACCACCCTTTTACGCCTTTTCAATGTTAGGACTCGGTATTCGGTTTGCAGCTAGGTATTGCACGCATGGGAATATGGCCCAACGACCATCAACAAACCAGCTAGGGCAC…	106
ba41	DEL	Chr1	3090943	3091204	AATCCCAACTTTGACACTATGCAAAAAGAAGATTCCCCATCACATCAAACTTGCGATACATGTATGGAGTACTAAATGTAGATGAAATCAAAAACTAATTGCACAGTTTTGTTGTACTTTGCGAGACGAATCTTTTGAGCCTAATTAGTCAATTTTTGGATAATAATTCACAAATACAAACGAAATGCTACAGTTGCGCATTTATGACAAACTCCCAACTTTGACACTCCCAAATTGGAAACTAAACAAGGCCCAAACTTT	285
ba42	DEL	Chr1	3125962	3126323	AACAACTCAGGGGGTGTTTTCTTCCCGTGTCTTATTTTTAGCACGTGTCACATCGAATGTTTAGATACTAATTAGGAGTAGTAAACGTAGACTATTTACAAAACCAATTACATAAGTGGAATCTAAACGGCGAGACGAATCTATTAAGCCTAATTAAGCCTAATTAATCCATCATTAGCAAATATTTACTGTAGCAACACATTGTCAAATCATGGACTAATTAGGCTTAATAGATTCGTCTCGCCGTTTAGATTCGTCTTATGTAATGGGTTTTGTAAATAGTCTACATTTAATACTCCTAATTAGTATCTAAACATTCGATGTGACAGGTGCTAAAGTTTAGCAAGCGGAAGAAAACAGG	366
ba43	DEL	Chr1	3194723	3195026	TCCCATACCACTATAAGGCCTTGTTTAGTTCCCAATTTGGGATAGGCAAAATTGGCATTTTGCCATAAATGCGCAACTGTAGCGTTTCGTTTGTATTTGTAAATTATTGTCCAAATATTGACTAATTAGGCTCAAAAGATTCGTCTCGCAAAGTACAACAAAACTGTGCAATTAGTTTTTTATTTCGTCTACATTTAGTACTCCATGCATGTACCGCAAGTTTGATGTGATGGGGAATCTTCTTTTTGCATAGTGTCAAAGTTGGGAGTTTGGAGGGAAGTAAACATGGCCTAACTTTCTTGG	283
ba44	DEL	Chr1	3196248	3196522	AATATGAGCTAATTACAAAACTAATAGCAGAACCCCTAGGCTAAATCACGAGACGAATCTATTAAGCCTAATTAATCCATCATTAGCGAATGGTTACTGTAGCACCACATTGTCAAATCATGGACTAATTAGGCTTAATAGATTCGTCTCGCGATTTAGCCTAGGGGTTGTGCAATTAATTTTGTAATTAAACTATATTTAATGCTCCTAATTAGTGTCCAAACATCCGATGTGACAGGGGCTAAAATTTAGCCCCTCCCTGCCAAACACCCCC	284
ba49	DEL	Chr1	4236161	4236406	CCCAACTTTGACACTATGCAAAAAGAAGATTCCCATCACATCAAACTTGCGGTACATGCATGGAGTACTAAATGTAGATGAAATTAAAAACTAATTGCACAGTTTTGTTGTACTTTGCGAGACGAATCTTTTGAGCCTAATTAGTCAATATTTGGACAATAATTCACAAATACAAACGAAACGCTACAGTGTGCTACAGTGCTGTAACAGTAATTTGGCACCTCCCAAATTCCCCAACTAAACAA	272
ba51	DEL	Chr1	4236843	4236953	GTCTTATGTAATGGGTTTTGTAAATAGTCTACGTTTAATACTCCTAATTAGTATCTAAACATTCGATGTGACACGTGCTAAAAATAAGTCAGTGGAAGAAAACGCCCCCT	363
ba52	DEL	Chr1	4333237	4333515	TAGGCCATGTTTAGTTACTCCCAACTCCCAACTTTGACACTATGCAAAAAGAAGATTCCCCATCACATCAAACTTGCGGTACATGCATGGAGTACTAAATGTAGATGAAATTAAAAACTAATTGCACAGTTTTGTTGTACTTTGCGAGACGAATCTTTTGAGCCTAATTAGTCAATATTTGGACAATAATTCACAAATACAAACGAAACGCTACAGTGTGCTACAGTGCTGTAACAGTAATTTAGCACCCCCAAATTCGCCAAACTAAACACGGCCTT	275
ba57	DEL	Chr1	4583111	4583350	TATAAGTCATTCCAACTTTCTTAGAGAGTCAAAGCATCTCAAGTTTGACCAAATTTATACAATAAAGTGCTAACATTCATGATATCAAATAGGTACCATTAGTTTCTTCATTAAATATATTTTCATAATATATCTATTCGATGCCATAAACTTTTGTGATTTTCTCTATAATTTTAGTCAAACATAAAAATGTTTGACTCTCCAACAAAGTTGGAATGACTTATAATTTGGAACGGAGG	268
ba61	DEL	Chr1	4697352	4697627	TGTTTAGTTGGGGAATTTGGGAGGTGCCAAATTACTGTTACAGCACTGTAGCACACTGTAGCGTTTCGTTTGTATTTGTGAATTATTGTCCAAATATTGACTAATTAGGCTCAAAAGATTCGTCTCGCAAAGTACAACAAAACTGTGCAATTAGTTTTTAATTTCATCTACATTTAGTACTCCATGCATGTACCGCAAGTTTGATGTGATGGGGAATCTTCTTTTTGCATAGTGTCAAAGTTGGGAGTTGGGAGTAACTAAACAGGGCCTAACTT	275
ba67	DEL	Chr1	5188276	5188599	CCGTGCTTCCCTTCTGTCGGCGGTAGCGTAAGTCTTTTGTCGGCGTTAGCGTAAGGCCTTGTTTAGTTGGTCAATTTGGGAGGTGCCAAATTACTGTTACAGCACTGTAGCACACTGTAGCGTTTCGTTTGTATTTGTGAATTATTGTCCAAATATTAACTAATTAGGCTCAAAAGATTCGTCTCGTAAAGTACAACAAAACTGTACAATTACTTTTTAATTTCATCTACATTTAGTACTCCATACATGTACCGCAAGTTTGATGTGATGGGGAATCTTCTTTTTGCATAGTGTCAAAGTTGGAAGTTGGGAGTAACTAAACA	291
ba68	DEL	Chr1	5349659	5349930	GTTTAGTTACTCCCAACTCCCAACTTTGACACTATGCAAAAAGAAGATTCCCCATCACATCAAACTTGCGGTACATGCATGGAGTACTAAATGTAGATGAAATTAAAAACTAATTGCACAGTTTTGTTGTACTTTGCGAGACGAATCTTTTGAGCCTAATTAGTCAATATTTGGACAATAATTCACAAATACAAACGAAACGCTACAGTGTGCTACAGTGCTGTAACAGTAATTTGGCACCTCCCAAATTCCCCAACTAAACACGGCCGAA	282
ba74	DEL	Chr1	5568615	5568997	GTCGTAGAGTATAGTGCTCACCCGCTATCTCAGCGAAGGGGGTGTTTGGATACGAGGTGCTAAACTTTAACAGTGTCACATCGGATGTTCGGATACTAATTAGGAGCACTAAACATAAGCTAATTCTAAAACTAATTGCAGAACCCTGTGCTAATTCGCGAGACGAATCTATTAAGCCTAATTAATCCATCATTAGCAAATGGTTACTGTAGCACCACATTGTCAAATCATGTACTAATTAGGCTTAATAGATTCGTCTCGCGAATTATACTCCATCTGTGCAATTAGTTTTGTAATTAGCCTATGTTTAATACTCCTAATTAGCATCCAAACATCCGATATGACAGGTGTTAAACTTTAATAGGGTGTTCCCAAACACCCC	349
ba78	DEL	Chr1	5733296	5733516	AGTTTGGCGAATTTGGGGGTGCTAAATTACTGTTACAGCACTGTAGCACACTGTAGCGTTTCGTTTGTATTTGTGAATTATTGTCCAAATATTGACTAATTAGGCTCAAAAGATTCGTCTCGCAAAGTACAACAAAACTGTGCAATTAGTTTTTAATTTCATCTACATTTAGTACTCCATGCATGTACCGCAAGTTTGATGTGATGGGGAATCTTCTTTT	275
ba80	DEL	Chr1	5741998	5742169	TGTTGCCTTAATTTTCTGTCCAAATTGTACCTTTGCACTCTTAGGAGTTTCAATTCATGTAAAGCAGATCAGAGAGCTGCAAGGCCTGCTGTCTTATTGACTGTCTTCACAGAATTTCAGCAGTTTCACTGTTTCCGGTAGGATGTTTTCTGGGATATCTTCAATCGCGGT	188
ba84	DEL	Chr1	5788734	5789059	TAAATTTTAGCCCCTGTCACATCGGATGTTTGGACACTAATTAGGAGTATTAAACATAGTCTAATTACAAAACTAATTGCACAACCCCTAGGCTAAATCGCGAGACGAATCTATTAAGCCTAATTAGTCCATGATTTGACAATGTGGTGCTACAGTAACCATTCGCTAATGATGGATTAATTAGGCTTAATAGATTCGTCTCGCGATTTAGCCTATGGGTTCTGCTATTGGTTTTTTAATTAGCTCATATTTAGTCCTCCTAATTAGCATCTGAACGTGTGATGTGACAGGGCTAAAGTTTAGCCCCTGACATCCAAACGCCCCC	349
ba85	DEL	Chr1	5790509	5790828	AGGAGGCTAAACTTTAGCCCTGTCACATCGGATGTTCGGATACTAATTAGGAGGACTAAACATAAGCTAATTACAAAACTAATTGCAGAACCCCTAGGCTAAATCGCGAGACGAATCTATTGAGCCTAATTAATCCATCATTAGTGAATGGTTACTGTAGCACCACATTGTCAAATCATGCACTAATTAGGCTTAATAGATTCGTCTCGCGATTTAGCCTAGGGGTTGTGTAATTAGTTTTGTAATTAATCTAGGTTTAATACTCCTAATTAGTGTCCAAACATTCGATGTGACGGGGGCTAAAATTTAGCCCCCTCCT	342
ba90	DEL	Chr1	6149740	6150121	AACTACCCCACGCGGCTGGGCCTGTTTGGGAACACCCGTCACATCGGATGTTTGGATGCTAATTAGGAGTATTAAACATAGGCTAATTACAAAACTAATTGCACAAATGGAGTGTAATTCGCGAGACGAATCTATTAAGCCTAATTAGTTCATGATTTAACAATGTGGTGCTACAGTAACCATTTGCTAATGATGGATTAATTAGGCTTAATAGATTCATCTCGCAAATTAGCACAGAGTTCTGCAATTAGTTTTATAATTAGCTCATATTTAATTCTTCTAATTAGCATCCGAACATCCAATGTGACACTGTTAAAGTTTAACACCTCGTATCCAAACACCCCCTAATACGAAACGTGGTGGGGTGGAGGCAGGGAATCC	332
ba91	DEL	Chr1	6240506	6240757	TTGGGGGTGCTAAATTACTGTTACAGCACTGTAGCACACTGTAGCGTTTCGTTTGTATTTGTGAATTATTGTCCAAATATTGACTAATTAGGCTCAAAAGATTCGTCTCGCAAAGTACAACAAAACTGTGCAATTAGTTTTTAATTTCATCTACATTTAGTACTCCATGCATGTACCGCAAGTTTGATGTGATGGGGAATCTTCTTTTTGCATAGTGTCAAAGTTGGGAGTTGGGAGTAACTAAACATGGC	282
pD185	DEL	Chr1	7253368	7253493	ATTAACATGCACAAAGAGCCAGATGTCGGGGGGGGGGGGGGTTTGTTGCGCATTCTAGTTCAATAGTTTCTTTTTTATTTACATATCAAACAAAAGAAAAAACCTTTCAAGGTTGGTGTGGTTAA	120
ba102	DEL	Chr1	7320113	7320450	CAAGCATGGAGCTCGCCAAATCCAAACTTTCAGCCAGTTCCAATAGGTCGAATGGAAGCTGCTTCAGTCTGACCCTGACACCCCTCTGTCCTGAAAAGGATGCAACTATGGTAAGCGTGCCAGTTAAAGTGCTTCACGTTTGACCATGTTTGTAGTAAATAGTATTCACATTTATGGCTCCAAATTAATTTATTATGAAAATACATTTCATAATTAATCTAATAATGTTTATTTGATATTATATATATTTATACTTTTTCATCTATAATAGGTCAAACTTGACACAGTAAATCATGACACTGTTCCAGAATTGCATTTTTTTGGGGACGGAGGGAGT	248
ba103	DEL	Chr1	7321611	7321872	TCCCAACTCCCAACTTTGACACTATGCAAAAAGAAGATTCCCCATCACATCAAACTTGCGGTACATGCATGGAGTATTAAATGTAGATGAAATTAAAAACTAATTGCACAGTTTTGTTGTACTTTGCGAGACGAATCTTTTGAGCCTAATTAGTCAATATTTGGACAATAATTCACAAATACAAACGAAACGCTACAGTGTGCTACAGTGCTGTAACAGTAATTTGGCACCTCCCAAATTCCCCAACTAAACACGGCCTAA	292
ba104	DEL	Chr1	7323326	7323765	AAAGTCCCCCAGCCTTCCCCTCCTCGCCGGGCGGCGTGCATCATGAACAAGAAGCGTGTTCTTGCAGGGATGTTTGGATAGCAGGTCCTAAATTTTAGCACCTGTCACATCGGATGTTTGGACACTAATTAGAAGTATTAAACATAGTCTAATTACAAAACTAATTTAGTCTAATTACAAAACTAATTGCACAACCCCTAGGCTAAATCGCGAGACGAATCTATTAAGCCTAATTAATCCATCATTATTTATATGATGACGGTACTCGCCATTGTCAATCATGGACTAATTAGGCTTAATAGATTCGTCTCGCGATTTAGCCTAGGGGTTGTGCAATTAGTTTTGTAATTAGACTATGTTTAATACTCCTAATTAGTGTTCAAACATCCGATGTGACAT…	362
ba105	DEL	Chr1	7324205	7324499	TTTAGTTACTCCCAACTCCCAACTTTGATACTATGCAAAAAGAAGATTCCCCATCACATCAAACTTGCGGTACATGCATGGAGTACTAAATGTAGATGAAATTAAAAACTAATTGCACAGTTTTGTTGTACTTTGCGAGACGAATCTTTTGAGCCTAATTAGTCAATATTTGGACAATAATTCACAAATACAAACGAAACGCTACAGTGTGCTACAGTGCTGTAACAGTAATTTGGCACCTCCCAAATTCCCCAACTAAACACGGCCCAAGCTTACTCCTAGTCCTAGCTAGCT	269
ba106	DEL	Chr1	7374340	7374720	CAGAAGGGTCGCCTTTGCGATTGCTTTTAGGCCCCGTTTGGATCATTGGAATTGAATTCCATCCTAATAATCATAATTTAGACACAAATTAATTAAGCTAATATAATTGTATGTGGAATATAGTTGTATATTATAGTTGGTGATATGGGAGAGATACTTGTATGCTGCACTTCTACTATAGAGAAGCGAGTCTAAGAGCGTGCTATAAGAATTGAATTCCATCTAATAACCATAATCTATAGAATCAATTTCCATCTCCCACCCCATGAATTTAAGATAGGCTTATATCTAAACTTTGGAAAGTTGTGGAATGCCACATTCCAACATAAATTAGCCTACTCCATTAAATAGATTCCAATTCCTTGGACCCAAACGGGGCC	350
ba110	DEL	Chr1	7465948	7466101	GCTGTGCTTCCTAGTAATACTAGGAGTATTTAGAGTTATATATATATATATATATATATATATATATATATATATATATATATATATAGCTGTATATATGGAGTTACTATGGCTGGTAGGAGTAATTAAGAGCGGCGTTCTTTTGAGAATAAT	163
ba114	DEL	Chr1	7605782	7606125	CCGTGTCTTATTTTTAGCACGTGTCACATCGAATGTTTAGATACTAATTAGGAGTAGTAAACGTAGACTATTTACAAAACCAATTACATAAGTGGAATCTAAACGGCGAGACGAATCTATTAAGCCTAATTAAGCCTAATTAATCCATCATTAGCAAATATTTACTGTAGCAATACATTGTCAAATCATGGACTAATTAGGCTTAATAGATTCGTCTCGCCGTTTAGATTCGTCTTATGTAATGGGTTTTGTAAATAGTCTACGTTTAATACTCCTAATTAGTATCTAAACATTCGATGTGACGGGTGCTAAAGTTTAGCAAGTGGAAGAAAACAGGCCCTAA	351
ba115	DEL	Chr1	7617644	7617965	AAGTTTAACACCTATCACATCGGATGTTGGATGCTAATTAGGAGTATTAAACATAGGCTAATTACAAAACTAATTGCACAGATGGAGTATAATTCGCGAGACGAATCTATTAAGCCTAATTAGTCCATGATTTGACAGTGTGGTGCTACAGTAACCATTTGCTAATGATGGATTAATTAGGCTTAATAGATTCGTCTCGCGAATTAGGACAGGGTTCTGCAATTAGTTTTATAATTAGCTCATGTTTAGTCCTCCTAATTAGCATCCGAACATCCGATGTGACACTGTTAAAGTTTAGCACCTCGTATCCAAACACCCCCT	353
pD232	DEL	Chr1	7627295	7627570	ATTGGGCCTTGTTTAGTTCCCAAATTGGGAGTGGCAAAATTTGCATTTGTCATAAATGCACAACTGTAGCATTTCGTTTGTATTTGTGAATTATTGTCCAAACATTGATTAATTAGGCTCAAAAGATTCGTCTCGCAAAGTACAACCAAATTGTGCAATTAGTTTTTGATTTCGTCTACATTTAGTACTCCATGTACCGCAAGTTTGATGTGATGGGGAATCTTCTTCTTGCATAGTGTCAAAGTTGGGAAAAAGGGACCTAAACAAGACCTTGG	270
ba128	DEL	Chr1	8635624	8635887	AGCTAATTACAAAACTAATTGCACAGATGGAGTATAATTCGCGAGACGAATCTATTAAGCCTAATTAGTCCATGATTTGACAATGTTGTGCTACAGTAACCATTTGCTAATGATGGATTAATTAGGCTTAATAGATTCGTCTCGCGAATTAGCACAAGGTTCTGCAATTAGTTTTATAATTAGCTCATGTTTAGTCCTCCTAATTAGCATCCGAACATCCGATGTGACACTGTTAAAGTTTAGCACCTCGTATCCAAACAGCC	352
ba131	DEL	Chr1	8778399	8778856	CTAAAGGGAACATATCCAGTAGAAACCACACCCTTCATGAAAACCTGTGCAAACCAAAATAAAAATTCGTCTAAATTCACAAAAAAAATCACACATGTAGATGATATATGATGATACACATCCTTGTAAAATATCTTGTCCAAACTCGACTTCGTTTGTGAGATATAAAAATAAAAGATTCTAATAAATCATTTGGACAACTTTCAGCCTTGGTATTTGTTATTTTTATATCTCACAAACGAAGTCGAGTTTGGACAAGATATTTTACAAGATTGTTCATCATCATATTATCTATACGTGTGATTTTATTGGTGAATTTATATGACTTTTTTACGTGGTTTGCACTGGTTTTCATGAAGGGTGTGGTTTCTACTAGATATGTTCCCATTTCTAAATCAT…	378
ba145	DEL	Chr1	10228738	10228863	CGCCCTGTTCGCTTCAGCTTATTCAGCCGGCTTATCAGTCACCAAACAGTATTTTTCTCTCACAACAAATCAGTCGTTTCAGCTTTCCAGCCGGCTTATAAGCTGAAGCGAACAGGCCCACTAAC	122
ba159	DEL	Chr1	10396282	10396698	TGTGGAAAGTTTGTGTTACAAATTCCTTCCTAATTCATATACATTGTTATTTAAAAATGCTTACCTAAGGGCATGTTTGGCAACCAACTGTTAAAGTTTAACACCCGTCACATCGGATGTTTGGATGCTAATTAGGAGTATTAAACATAGGCTAATTACAAAATTAATTGCACAGATGGAGTATAATTCGCGAGACGAATCTATTAAGCCTAATTAGTCCATGATTTGACATTGTGGTGCTACAGTAACCATTTGCTAATGATGGATTAATTAGGCTTAATAGATTCGTCTCGCGAATTAACATAGGGTTCTGTAATTAGTTTTATAATTAGCTCATGTTTAGTTCACCTAATTAGCATCCGAACATCCGATGTGACACTGTTAAAGTTTAACACACCG…	359
ba162	DEL	Chr1	10531913	10532183	TGTGTTCAGGATGTCATGGTTTTGTTAAATATTTCTAGCTATATACAATGATTATATTTTCCCATGCAACAGAGAATGATCTGGACCAAATGGCTCCAGACGATGATGGACCTGATATCCTACTAGATGATGAAGCAAGGGTGTTTCATGAGAAGGGTGAGTTTTCATAATGCATCATACATATTTGGACTTTATGTTATCTTACTATTGGTTTTTTTTTGTCATATACAGGTTTTGTGTATGAGTATCCAGAGATCCAGAGTATGTTGC	130
ba165	DEL	Chr1	10559175	10559412	AGAAATATTTAATGATGTCTAATTGCCAATTGCTTCCCCAGCAACGGCGCTAGAAATGCTTGTTAGTATCTCTTATGGCCTAAAGATTAATTTCAGATTAATTCTGCAAGCGCATAGAATCACTGTTGTAGCATTTCACCCGGGAGTATTCCAAGGTATTGTATTTATATTTTTTCAGAGGGAAGCACTAGTGGCGTAGACGATCTCTTAATAAATCCTTCGAGCGTTACCACAACT	220
ba167	DEL	Chr1	10621372	10621591	GGAGGACGTTTCTGCCTTTTCTTTTACCTTCTACTAAAAGGATAGTATACTGGTACCTTTTCAGGTTATATTTGACATTAGGCGTATTTTTATTCCAATTTTGGGTTGGCCTGCTTGACCACGGTACTGATTAGCCAGTTGCGCTTGCCTCTGGAGCTAGTTTATATGGATCAAGTAGACCCAAGTGATGGAAACAAAACTACAGAGCTGTATTATTTT	269
ba190	DEL	Chr1	16036281	16036608	TAAATTTTAGCCCCTGTCACATCGGATGTTTGGACACTAATTAGGAGTATTAAACATAGTCTAATTACAAAACTAATTGCACAACCCCTAGGCTAAATCGCGAGACGAATCTATTAAGCCTAATTAGTCCATGATTTGACAATGTGGTGCTACAGTAACCATTCGCTAATGATGGATTAATTAGGCTTAATAGATTCGTCTCGCGATTTAGCCTATGGGTTCTGCTATTAGTTTTTTAATTAGCTCATATTTAGTCCTCCTAATTAGCATCTGAACGTGTGATGTGACAGGGCTAAAGTTTAGCCCCTGACATCCAAACGCCCCCTA	345
ba207	DEL	Chr1	22639901	22640244	TGTTTGGATACGAGATGTTAAACTTTAACAGTGTCACATCGGATGTTCGGATGCTAATTAGGAGAACTAAACATGAGCTAATTATAAAACTAATTGCAGAACCCTGTGCTAATTCGCGAGACGAATCTATTAAGCCTAATTAATCCATCATTAGCAATTGGTTACTGTAGCACCACATTGTCAAATCATGGACTAATTAGGTTTAATAGATTCGTCTCGTGAATTATACTCCATCTGTGCAATTAGTTTTGTAATTAGCCTATGTTTAATACTCCTAATTAGCATCCAAACATCCGATGTGACAGGTGTTAAACTTTAACACATGGTTGCCAAACAGGCCCGT	353
ba216	DEL	Chr1	23880514	23880846	GATATGAGGTGCTAAACTTTAACAGTGTCACATCGGATGTTCGGATGCTAATTAGGAGGACTAAATATGAGCTAATTATAAAACTAATTGCAGAACCTTGTGCTAATTCGCGAGACGAATCTATTAAGCCTAATTAATCCATCATTAGCAAATGGTTACTGTAGCACCACATTGTCAAATCATGGACTAATTAGGCTTAATAGATTCGTCTCGCGAATTATACTCCATCTGTGCAATTAGTTTTGTAATTAGCTTATGTTTAGTACTCCTAATTAGCATCCAAACATCCGATGTGACAGGTGTTAAACTTTAACAGGGGTTTCCCAAACACC	352
ba219	DEL	Chr1	24048837	24049180	GTTTGGATGTCAGGGGCTAAACTTTAGCCCTGTCACATCACACGTTCAGATGCTAATTAGGAGGACTAAATATGAGCTAATTAAAAAACTAATAGCAGAACCCATAGGCTAAATCGCGAGACGAATCTATTAAGCCTAATTAATCCATCATTAGCGAATGGTTACTGTAGCACCACATTGTCAAATCATGGACTAATTAGGCTTAATAGATTCGTCTCGCGATTTAGCCTAGGGGTTGTGCAATTAGTTTTGTAATTAGACTATGTTTAATACTCCTAATTAGTGTCCAAACATCCGATGTGACAGGGGCTAAAATTTAGCCCCTCCCTGCCAAACACCCCCA	353
ba224	DEL	Chr1	24209625	24209787	TAAGCACCCGTCACATTGAATGTTTAGATACTAATTAGGAGTATTAAACGTAGACTATTTACAAAACCGATTACATAAGTGGAGGCTAAACGGCGAGACGAATCTATTAAGCCTAATTAGTCCATGATTTGACAATGTGTTGCTACAGTAAACATTTGCTAA	343
ba229	DEL	Chr1	24260920	24261328	GCTTGGAAACACCTACCATCCTATGGGGGTGTTTTCTTCCCGTGTCTTATTTTTAGCACGTGTCACATCGAATGTTTAGATACTAATTAGGAGTAGTAAACGTAGACTATTTACAAAACCAATTACATAAGTGGAATCTAAACGGCGAGACGAATCTATTAAGCCTAATTAAGCCTAATTAATCCATCATTAGCAAATATTTACTGTAGCAACACATTGTCAAATCATGGACTAATTAGGCTTAATAGATTCGTCTCGCCGTTCAGATTCGTCTTATGTAATGGGTTTTGTAAATAGTCTACATTTAATACTCCTAATTAGTATCTAAACATTCGATGTGACAGGTGCTAAAGTTTAGCAAGCGGAAGAAAACAGGCCCTATATTGCATTGGGCAGCTT…	351
ba232	DEL	Chr1	24315582	24315846	TTAGTTGGGGAATTTGGGAGGTGCCAAATTACTGTTACAGCACTGTAGCACACTGTAGCGTTTCGTTTGTATTTGTGAATTATTGTCCAAATATTGACTAATTAGGCTTAAAAGATTCGTCTCGCAAAGTACAACAAAACTGTGCAATTAGTTTTTAATTTCATCTACATTTAGTACTCCATGCATGTACCGCAAGTTTGATGTGATAGGGAATCTTCTTTTTGCATAGTGTCAAAGTTGGGAGTTGGGAGTAACTAAACATGG	271
ba243	DEL	Chr1	24536260	24536411	AAGTAAGTTTTTTTTTATAATAGTTTAGGCCTGTTCGCTTTAGCTTATTCAGCCGGTTTATCAGCCACCAAATAGTATTTTCCTCTCACAACAAATCAGCCGTTTCAGCTTTTCAGCCGGCTTATAATCTGAAAGGAACATACCTAGCTTG	135
pD479	DEL	Chr1	24634555	24634836	TATAGGCCGTGTTTAGTTTGGCGAATTTGGGGTGCTAAATTACTGTTACAGCACTGTAGCACACTGTAGCGTTTCGTTTGTATTTGTGAATTATTGTCCAAATATTGACTAATTAGGCTCAAAAGATTCGTCTCGCAAAGTACAACAAAACTGTGCAATTAGTTTTTAATTTCATCTACATTTAGTACTCCATGCATGTACCGCAAGTTTGATGTGATGGGGAATCTTCTTTTTGCATAGTGTCAAAGTTGGGAGTTGGGAGTAACTAAACATGGCCATAG	276
ba244	DEL	Chr1	24640916	24641181	TACTCCCAACTCCCAACTTTGACACTATGCAAAAAGAAGATTCCCCATCACATCAAACTTGCGGTACATGCATGGAGTACTAAATGTAGATAAAATTAAAAACTAATTGCACAGTTTTGTTGTACTTTGCGAGACGAATCTTTTGAGCCTAATTAGTCAATATTTGGACAATAATTCACAAATACAAACGAAACACTACAGTGTGCTACAGTGCTGTAACAGTAATTTGGCACCTCCCAAATTCCCCAACTAAACACGGCCTTGG	259
ba245	DEL	Chr1	24641451	24641607	CGCGCATGCATTTCCCGATCCCCGTGGGGCCGTGACCGTGGGCCTGTTCGCTTCAGCTTATAAGCCGGCTGAAAAGCTGAAACGGCTGATTTGTTGTGAGAGGAAAACACTGTTGGGTGGCTGATAAGCCGGTTGAATAAGCTGAAGCGAACAGGC	120
ba253	DEL	Chr1	26121269	26121618	AAATTTAGCCTTGGGCTAAACTTTAGCCCTCTCAAATGTTGAGGCTAAAGTTTAGCCCTTGGGGTGTTTGGGTAAGGGGCTAAAGTTTAGCACTTATGTTGACAAAAGACCTATTTACCCATGTTGGAGGAGTGAGAGGGAGGAGAGAGAGAGGGGCAAGGGGAGGAATTTTGGATAAGGGGACCACTTTTAGCCCCTTTAGTCCATTTTAGCACCTCTTGAGGGGCTAATGGATTATGGGGGGCTAAAATTTAGCCCCTCCATTTTAGCCTAGGTGTTTGGGAGCACTAGTGGCTAAAAGTGACTAAAATGGGGGTGCTAAAATTTAGCACCCCTCTCCCAAACACCC	376
ba254	DEL	Chr1	26122606	26122938	GATACGAGGTGCTAAACTTTAACAGTGTCACATCGGATGTTTGGATGCTAATTAGGAGGACTAAACATGAGCTAATTATAAAACTAATTGCAGAACCTTGTGCTAATTCGCGAGACGAATCTATTAAGCCTAATTAATCCATCATTAGCAAATGGTTACTGTAGCACCACATTGTCAAATCATGGACTAATTAGGCTTAATAGATTCGTCTCGCGAATTATACTCCATCTGTGCAATTAGTTTTGTAATTAGCTTATGTTTAGTACTCCTAATTAGCATCCAAACATCCGATGTGACAGGTGTTAAACTTTAACAGGTGTTTCCCAAACACC	350
ba255	DEL	Chr1	26127638	26128012	GGGTGTTTGGGAAACACCTGTTAAAGTTTAACACCTATCACATCGGATGTTTGGATGCTAATTAGGAGTACTAAACATAAGCTAATTACAAAACTAATTGCACGGACGGAGTATAATTCGCGAGACGAATCTATTAAGCCTAATTAGTCCATGATCGACAATGTGGTGCTACAGTAACCATTTGCTAATGATGGATTAATTAGGCTTAATAGATTCGTCTCGCGAATTAGCACAAGGTTCTGCAATTAGTTTTATAATTAGCTCATGTTTAGTCCTCCTAATTAGCATCCAAACATCCGATGTGACACTGTTAAAGTTTAGCACCTCGTATCCAAACAGCCCCTAAGTTGAAAACACTACGTGGACTAAGACGT	358
ba256	DEL	Chr1	26147951	26148320	GGTGCTAAACTTTAACGGTGTCACATCGGATGTTCGGATGCTAATTAGGAGGACTAAACATGAGCTAATTATAAAACTAATTGCAGAACCTTGTGCTAATTCGCGAGACGAATCTATTAAGCCTAATTAATCCATCATTAGCAAATGGTTACTGTAGCACCACATTGTCAAATCATGGACTAATTAGGCTTAATAGATTCGTCTCGCGAATTATAATCCATCTGTGCAATTAGTTTTGTAATTAGCTTATGTTTAGTACTCCTAATTAGTATCCAAACATCCGATGTGACAGGTGTTAAACTTTAACAGGTGTTTCCCAAACACCCCCTGAGTCGTGACGTTCCTCGACAGGACGACGGAAGGCTGTTA	341
ba258	DEL	Chr1	26479909	26480182	TAGGCCATGTTTAGTTACTCCCAACTTCCAACTTTGACACTATGCAAAAAGAAGATTCCCCATCACATCAAACTTGCGGTACATGCATAGAGTACTAAATGTAGATGAAATTAAAAACTAATTGCACAGTTTTGTTGTACTTTGCGAGACGAATCTTTTGAGCCTAATTAGTCAATATTTGGACAATAATTCACAAATACAAACGAAACGCTACAGTGTGCTACAGTGCTGTAACAGTAATTTGGCACCTCCCAAATTCCCCAACTAAACAAG	278
ba263	DEL	Chr1	27146891	27147169	TAGGGCCGTGTTTAGTTTGGCGAATTTGGGGGTGCTAAATTACTGTTACAGCACTGTAGCACACTGTAGCGTTTCGTTTGTATTTGTGAATTATTGTCCAAATATTGACTAATTAGGCTCAAAAGATTCGTCTCGCAAAGTACAACAAAACTGTGCAATTAGTTTTTAATTTCATCTACATTTAGTACTCCATGCATGTACCGCAAGTTTGATGTGATGGGGAATCTTCTTTTTGCATAGTGTCAAAGTTGGGAGTTGGGAGTAACTAAACATGGCCT	280
ba264	DEL	Chr1	27148510	27148830	AATTTTAGCCCCTGTCACATCGGATGTTTGGACACTAATTAGGAGCATTAAACATAGTTTAATTACAAAATTAATTGCACAACCCCTAGGCTAAATCGCGAGACGAATCTATTAAGCCTAATTAGTCCATGATTTGACAATGTGGTGCTACAGTAACCATTCGCTAATGATGGATTAATTAGGCTTAATAGATTCGTCTCGTGATTTAGCCTAGGGGTTCTGCTATTAGTTTTGTAATTAGCTCATATTTAGTCCTTCTAATTAGCATCCGAATGTGTGATGTGACAGGGCTAAAGTTTAGCCCCTGACATCCAAACGCC	352
ba269	DEL	Chr1	27737023	27737400	TACAAGGTGTTAAACTTTAACAGTGTCACATCGGATGTTCGGATACTAATTAGGAGGACTAAACATGAGCTAATTATAAAACTAACTGCAGAACCCCTATACTAATTCGCGAGACGAATCTATTAAGCCTAATTAATCCATCATTAGCAAATGGTTACTGTAGCACCACATTGTCAAATCATGGACTAATTAGGCTTAATAGATTCGTCTCGCGAATTATACTCCATCTGTACAATTAGTTTTGTAATTAGCTTATATTTAGTACTCCTAATTAGCATCCAAACATCCGATGTGACAGGTGTTAAAGTTTAATAGGGTGTTCCCAAACACCCCCTTAGTTTATGCTGATTTCCGGGACTGAGGGAAAAAGAGAAAAA	344
ba270	DEL	Chr1	27765719	27765984	CCTTGTTTAGTTGCCCAACTTGGGTGCACCCAAATTACTGTAGCAACACTGTAGCGTTTCGTTTGTATTTGTGAATTATTGTCCAAATATTGACTAATTAGGCTTAAAAGATTCGTCTCGCAAAGTACAACAAAATTGTGCAATTAGTTTTTGATTTCGTCTACGTTTAGTACTCCATGCATGTACCGCAAATTTGATGTGATGGGGAATCTTCTTTTTGCATAGTGCCAAAGTTGGGAGTTGGGGGTGAACTAAACATGGCCTA	269
ba273	DEL	Chr1	28250802	28251128	GGGGGCTAAATTTTAGCCCCCGTCACATCGAATGTTTGGACACTAATTAGGAGTATTAAACTTAGATTAATTACAAAACTAATTACACAACCCCTAGGCTAAATCGCGAGACGAATCTATTAAGCCTAATTAGTGCATGATTTGACAATGTGGTGCTACAGTAACCATTCACTAATGATGGATTAATTAGGCTCAATAGATTCGTCTCGCGATTTAGCCTAGGGGTTCTGCAATTAGTTTTGTAATTAGCTTATGTTTAGTCCTCTTAATTAGTATCCGAACATCCGATGTGACAGGGCTAAAGTTTAGCCTCCTCCTTCCAAACA	347
ba275	DEL	Chr1	28678281	28678537	AATTTGGGGTGCTAAATTACTGTTACAGCACTGTAGCACACTGTAGCGTTTCGTTTGTATTTGTGAATTATTGTCCAAATATTGACTAATTAGGCTCAAAAGATTCGTCTCGCAAAGTACAACAAAACTGTGCAATTAGTTTTTAATTTCATCTACATTTAGTACTCCATGCATGTACCGCAAGTTTGATGTGATGGGGAATCTTCTTTTTGCATAGTGTCAAAGTTGGGAGTTGGGAGTAACTAAACATGGCCTA	278
ba276	DEL	Chr1	28831215	28831419	ATTTGGGAGGTGCCAAATTACTGTTACAGCACTGTAGCAACACTGTAGCGTTTCGTTTGTATTTGTGAATTATTGTCCAAATATTGACTAATTAGGCTCAAAAGATTCGTCTCGCAAAGTACAACAAAACTGTGCAATTACTTTTTAATTTCATCTACATTTAGTACTCCATGCATGTACCGCAAGTTTGATGTGATAGGGAAT	287
pD619	DEL	Chr1	29385499	29385861	TCTATAGGTATTCTACAGCGGTGTTTCGATCTTTAGTTCGGACTAAAATTCATGTCACCTTGAATATTCAGAGGCTAATTAGGAGGACTAAACATGAGCTAATTATAAAACTAATTACACAAATGGAGGCTAATTCACGAGACGAATCTATTAAGCCTAATTAATCCATCATTAGCACATGTTTACTGTAGCATCACATTACCAAATCATGAACTAATTAGGCTTAATAGATTCGTCTCGCAAATTAGTCTCCATATGTGCAATTGGTTTTATAATTAGTCTATATTTAATACTCCTAATTAGTATCTAAACATTCGATGTGACAGGAATTTTAGGAGTGACTAAAGAAACAAACACCCCTA	358
ba288	DEL	Chr1	29393844	29394335	AGTATCAACAGTATATAGGGAATTCAGGTTATTACAACCTCAGCAGCAGAATTAGTTGGGTGTTTGTAATGTCACTTTTGCACTATTGAATTTTTGCCACATCTTATATTATAGTAATTAAGGCATAATGAACATTATACACATAAATGTGAAGGGGAAACTTAAAGAAAAGTAGTATTGATGAAATGTAGTGTAATTAATATAGAGCTAGACGTGGAAATCAAGCCTAAATATATACCAGCCAGTGGATTAACAAAGATAAAAAGTTGGATTGAATTGGGATAAACAAGGTCATAAAATATGCAATGGTTGGATGTTTCCCCGTAGAGTGCAAATGTTTGCAGCATTAACCGATACCTGTGGGGTCTTGGGGCCTGGGACCTAGGGAGGTAACCTTGA…	103
ba291	DEL	Chr1	29432856	29433219	TGAGGAGGACATCAATTATTAGCTAGCTTGTTCAGATTTCCTTCTTCTTTTCCTTCACCTCTCAACCCTGCTGCTGGCACGAGCTAAAGCCTTATTTAGTTATCAAAATTGGGAGTGCCAAAATTATTGTGCTGGTACTGTAGCACACTGTAGCGTTTCGTTTGTATTTGTGAATTATTGTCCAAACATTGACTAATTAGGCTCAAAAGATTCATCTCGCAAAGTACAACAAAACTGTGCAATTAGTTTTTAATTTCATCTACATTTAGTACTCTATGCATATACCGTAAGTTTGATGTGATGGAGAATCTTCTTTTTGCATAGTGCCAAAGTTGGGAGTTAGGGGTGAAGTAAACGAGGGCT	285
ba294	DEL	Chr1	29523050	29523405	CCCTCCTAAAATTTCTATCACATCAAATGTTTAGATACTAATTAGAAATATTAAATATAGACTAATTACAAAACCAACTGCACGGATGGAGACTAATTTGCGAGACGAATCTATTAAGCCTAATTAGTTCATGATTTGACAATGTGATGCTACAGTAAACATGCGTTAATGATAGATTAATTAGCTTAATAGATTAGTCCTCCTAATTAGTCTGCATCTGTGTAATTAATTTTATAATTAGTTTATATTTAATCTCATAATTAGTCTCCGAATATTTGATAAAAAACGCACCATGTGAAAGGAATCCTGCCAAGTGTGGATACTAAGCGAATTCCAACATATTTCAAGGACTTGA	298
ba295	DEL	Chr1	29532079	29532426	TAAGTCATTCCAAGAATCTTGGAGAGTCAAAGTATCTCAAGTTTGACTAAATTTATATGATAATATAATAACATTTATGATGTCATCTAAGTATCATTAGATTCTTCATCAATTATATTTTTATAGTATACCTATTTGATGTCATAAATCTTTATAATTTTCTCTATAATTTTGGTCAAACTTGAGATGCTTTGACTCTCCAAGATTCTTGAAATGACTTATAATTTGGGATGGAGGGAGTAATATTTATGAACTTATAAAAGCTAAAACAATCTACAGAGGGATTAAAAGAATAGATATAAGTGTATGTGTTTTCCTTCATTTTCCACTCAAATCCTATCAAAAAA	257
ba299	DEL	Chr1	29586977	29587355	ACTGTACCTCCTCTATCTACTTTTCGGGGGTGTTTGGATCTTTAGTCCCGACTAAAATTTATGTCACATCGAATATTTGAAGGCTAATTAGGAGGACTAAACATGAGCTAATTATAAAACTAATTACACAAATGGAGGCTAATTCACGAGACGAATCTATTAAGTCTAATTAATCCATCATTAGCACATGTTTACTGTAGCATCACATTGTCAAATCATGGACTAATTAAGCTTAATATATTCGTCTCGCAAATTAGTCTCCATCTGTGCAATTAGTTTTGTAATTAGTCTATATTTAATACTTCTAATTAGTATCTAAACATTCGATGTGACAGAAATTTTAGGAGCTACTAAAGAAACAAACACCCCCAACGGGCA	358
ba301	DEL	Chr1	29651164	29651507	TTTGGCAACCACCTATTAAAGTTTAACACCCGTCACATCGGATGTTTGGATGCTAATTAGGAGTATTAAATATAGGCTAATTATAAAACTAATTGCACAGATGGAGTATAATTCGCGAGACGAATCTATTAAGCCTAATTAGTCCATGATTTGACAATGTGGTGCTACAGTAACCATTTGCTAATGATGGATTAATTAGGCTTAATAGATTTATCTCGCGAATTAACACAGGGTTCTGCAATTAGTTTTATAATTAGCTCATGTTTAGTTCTCCTAATTAGCATCCGAACATCCGATGTGACACTGTTAAAATTTAACACCTCGTATCCAAACACCCCCGTAA	339
ba303	DEL	Chr1	29667240	29667745	TATGCCGTAATAACAAATCCATAGCTATTGCACTATTCCGAACCCTCTTTCTTTTCCCAAAGCTACAGTAGAGAGGGACGAGTTCCGAGCGATTCTCGATCCCGCACCCGTTTCTCGCCGATTCTTCTCTTCCGACGGCGTTGCCGGCGTCGGAGGTGAAGGGAATCGGCTCGAGAAGCGGGTGTGGTCCTGTATATCTGCTAGTTATAGGTTTAGCTTAGTACATTAGGTTGTCCCGCTGTCGGTGCCTGCCGGTGGCTTTAAGTTTCTTCTGTTGTTGACGCTCGCTGGCGGTAGTTCGGATGGTTCCGGTGGCTCTTTGTAGCTGGCTAGTTCTTTTGTCCCTCCAGGCGATTTCCGGTGGTGGCAACGATGACGAAGCCTTCCTCGGAGATGGAT…	393
ba307	DEL	Chr1	29717993	29718370	GCTTACAAAATCCCTTCTAACTAAGTCCTTGTTTAGTTCACCCCTAACTTCCAACTTTGGCACTATGAAAAAGAAAAGATTCCCCATCACATTAAACTTGTGGTACATGCATGGAGTACTAAATGTAGATGAAATTAAAAACTAATTGCACAGTTTTATTGTACTTTGCGAGACGAATCTTTTAAGCCTAATTAGTCAATGTTTGGACAATAATTCACAAATACAAACGAAACGCTACAGTGTGCTACAGTGCTATAATAGTAATTTGGCGCCTCCAAACTTTGGCAGGCCCAACTCGTTTTGTTTTCTTAGACTGGACACTCTGTACCTGACACAAAGTAAACCTTATACGATGGGACAATAAATTTCTAAGGCCT	368
ba309	DEL	Chr1	29743250	29743534	CCCAACTCCCAACTTTGACACTATGTAAAAAGAAGATTCTCCATCACATCAAACTTGGGGTACATGCATGGAGCACTAAATGTAGACGAAATTAAAAACTAATTGCACAGTTTTGTTGTACTTTGCGAGATGAATCTTTTGAGCCTAATTAGTCAGTGTTTGGACAATAATTCACAAATACAAACGAAACGCTACAGTATGCTACAGTGCTGTAACAGTAATTTGACACCTCCAAACTTTAGCAACTAAACAAGACCTAAGCTTCCAATTGCAGGGAAGAAATT	293
ba310	DEL	Chr1	30169478	30169893	ATTTTTAGCACCCGTCACATCAAATGTTTAGATACTAATTAGGAGTATTAAACGTAGACTATTTACAAAACCCATTACATAAGACGAATCTAAACGGCGAGACGAATCTATTAAGCCTAATTAGTCCATGATTTGACAATGTGTTGCTACAGTAAATATTTGCTAATGATGGATTAATTAGGTTTAATTAGGCTTAATAGATTCGTCTCGCCGTTTAGATTCCACTTATGTAATTGGTTTTGTAAATAGTCTACGTTTACTACTCCTAAATAGTATCTAAACATTCGATGTGACACGTGCTAAAAATAAGACACGGAAGAAAACGAAAACCACTTTCGTTTCCCTCCCGCTTCTCAAACAAGCGGGCTCATAGGCTTCTCCTTTCGTAAAACCAATGTT…	327
ba311	DEL	Chr1	30199290	30199642	TTTTTTTCCCTTGGAGGCTGGGGTCATGTTTAGTTCACTTTAAAATTCCAACTTTGGCACTATGCAAAAAGAAGATTCCCCATCACATCAAACTTGCGGTACATGCATAGAGTACTGAATGTAGACGAAACTAAAAACTAATTGCACAGTTTTGTTGTACTTTGCGAGACGAATCTTTTGAGCCTAATTAGTCAATATTTGGACAATAATTCACAAATACAAACGAAACGCTACAGTGTTGCTACAGTAATTTTAGCATCTTAAAATTGGGCAACTAAACAAGACCTTGGATGATTCAGCGTGCGCGAGAGCTGGAAGAACGGCCGCCCGTGCCGCGCCGCCATGACAAGGG	273
pD697	DEL	Chr1	30231375	30231647	TTTGGCCCTTGTTTACTTTGCGAATTTGGGAGGTGCCAAATTACTGTAGCAACACTGTAGCGTTTCGTTTGTATTTGTGAATTATTGTCCAAATATTGACTAATTAGGCTCAAAAGATTCGTCTCGCAAAGTACAATAAAACTGTGCAATTAGTTTTTGATTTCGTCTATATTTAGTACTCCATGCATGTACTGCAAGTTTGATGTGATGGGGAATCTTCTTTTTCATAGTGCCAAAGTTGGGAGTTTTGTAGGAAGTGAACAAGGGCTTGG	267
ba315	DEL	Chr1	30237666	30237938	TTGTGAATATACCAATAGCAGGACATAACTAAATCTGTGTACAGATGACAACAGAAAAACACAAGAAATAACATGAATCAACTGTAACTGAACTTATAGACATGCTACATTTCACAACCATTGAGTTATATAGAAGATGGTTTTTCCCCCTTAAATGAGTAATGCATAAATTCGTTTTGTTGTTGTGAATATACCAATAGCAGGACATAACTAAATCTGTGTACAGATGACAACAGAAAAACACAAGAAATAACATGAATCAACTGTAACTG	184
ba316	DEL	Chr1	30251415	30251880	CTATGCGAGTTTGCAGGAACAGAGGATTAGAGCCTGTTTTCTTCCACTTGCTAAACTTTAGCACCCGTCACATCGAATGTTTAGATACTAATTAGAAGTATTAAACGTAGACTATTTACAAAACCCATTACATAAGACGAATCTAAACGGCGAGACGAATCTATTAAGCCTAATTAGTCCATGATTTGACAATGTGTTGCTACAGTAAATATTTGCTAATGATGGATTAATTAGGCTTAATTAGGCTTAATAGATTCGTCTCGCGGTTTAAATTCCACTTATGTAATTGGTTTTGTAAATAGTCTACGTTTACTACTCCTAATTAGTATCTAAACATTCGATGTGACACGTGCTAAAAATAAGACACGGGAAGAAAACGCCCCCTTAGTCGGCGCGAGA…	362
ba317	DEL	Chr1	30270983	30271319	TGATTGAAATGAAATCACCTTCTCCCTCCATCCTCCCTCCATCCTAAATTATAAGTCATTCTAAAAATCTTGGAGAGTCAAGTATCTCAAGTTTGACCAAATTTATATGATAATATAATAACATTTATGATGTCACCTAAGTATCATTGGATTCTTCATCAATTATATTTTCATAGTATACCTATTTAATGTCATAAATCTTTATAATTTTCTCTATAATTTTAGTCAAACTTGAAATGCTTTGACTCTCCAAGATTCTTGGAATAACGTATAATTTGGAATGGAGGGAGTAGATGATAGGCTCATCAATGCATCAGCTGTATGAAAAATGCTTCC	269
ba322	DEL	Chr1	30336279	30336624	AAACTTTAACAGTGTCACATCGGATGTTCGGATGCTAATTAGGAGGACTAAATATGAGCTAATTATAAAACTAATTGCAGAACCTTGTGCTAATTCGCGAGACGAATCTATTAAGCCTAATTAATCCATCATTAGCAAATGGTTACTGTAGCACCACATTGTCAAATCATGGACTAATTAGGCTTAATAGATTCGTCTCGCGAATTATACTCCATCTGTGCAATTAGTTTTGTAATTAGCTTATGTTTAGTACTCCTAATTAGCATCCAAACATCCGATGTGACAGGTGTTAAACTTTAACAGGGGTTTCCCAAACACCCCCTTAATCAGGCTACTTGTACTCGC	375
ba323	DEL	Chr1	30340555	30340734	CAAAACAGATAAGTAGTGAAGGAAAATGACTTAGGTACCCTGAATTATCAGAAACATGCACATGCATACCTGTTCGCTTCAGCTTATCAGCCGGCTTATCAGCCACCAAACAGTATTTTCCTCTCACAACAAATTAGCCGTTTCAGCTTTTCAGCCGGCTTATACCTCAGCCGAACAGG	141
ba328	DEL	Chr1	30432494	30432751	CCCAACTCCCAACTTTGGCATTATGCAAAAAGAAGATTCCCCATCACATCAAACTTACGGTACATGCATGGAGTACTAAATGTAGATGAAATTAAAAACTAATTGCACAGTTTTGTTGTACTTTGCGAGACGAATCTTTTGAGCCTAATTAGTCAATGTTTGGACAATAATTCACAAATACAAATGAAACGCTACAGTATGCTACAGTGCCAGCACAGTAATTTAGCACCTTCCAATTTGGCCAACTAAACAAGACC	280
ba331	DEL	Chr1	30487545	30487874	TTTTTAGCACGTGTCACATCGAATGTTTAGATACTAATTAGGAGTAGTAAACGTAGACTATTTACAAAACCAATTACATAAGTGGAATCTAAACGGCGAGACGAATCTATTAAGCCTAATTAAGCCTAATTAATCCATCATTAGCAAATATTTACTGTAGCAACACATTGTCAAATCATGGACTAATTAGGCTTAATAGATTCGTCTCGCCGTTTAGATTCGTCTTATGTAATGGGTTTTGTAAATAGTCTACATTTAATACTCCTAATTAGTATCTAAACATTCGATGTGACAGGTGCTAAAGTTTAGCAAGCGGAAGAAAACAGGCC	366
ba332	DEL	Chr1	30517741	30518107	AAAAAAGGAGTAGAGCAACTCCAAGAGAATACTAAAAAATTCTTCCCAAAACTATGTATTGGGGTTCTCCCAAAAAAAATTTCCCCCAAAAATATATCAGTCCACAGCAGATCGCTAATAAATAGCCCCCAATATTTCAAACACAGGCCACGTCATCGTATTGGGTCCATTGGAAGGGACGCGTGGGTGTGCGGGAATCAGGATTGGGGGAGGAACGCCAACGCTAAAATATACGCGGTGGCAGGCTGTTTTTTAGCGTTGCTAAAAAATTAGGAAAGGTTTAGGTGGATTGTTGGAGTTCATTTTTTCTCTCTTTTTCCTAAAAGAAGATATTGGGGGTAAGATTAGCAGCCTCTTGGAGTTGCT	373
pD746	DEL	Chr1	30520196	30520340	AGGGTGTCAGGACAGGTTGTGGCAGTGTCACGAACCTTTTTTTTTATGAAATAGGAGGTTTTATCCCTGCTGGTTATATATTAAAAGGAGACGAATACAAAGCAGTTTGTAACTAAGAGAAGAAAAAGGTTAAGAAAAGCAGTG	143
ba333	DEL	Chr1	30542107	30542270	GAAAAGCTGAAACGGCTGATTTATTGTGAGATAGAGATGTACCTCAGGGTCTGTTCGCTTCAGCTTATAAGCCGGCTGAAAAGCTGAAACGGCTGATTTATTGTGAGAGAAAAACACTGTTTGGTGGCTGATAAGCCGGCTGAATAAGCTGAAGCGAACAGGC	185
ba335	DEL	Chr1	30573082	30573420	GCTTGCTAAACTTTAGCACCTGTCACATCGAATGTTTAGATACTAATTAGGAGTATTAAATGTAGACTATTTACAAAACCCATTACATAAGACGAATCTAAACGGCGAGACGAATCTATTAAGCTTAATTAGTCCATGATTTGACAATGTGTTGCTACAGTAAATATTTGCTAATGATGGATTAATTAGGCTTAATTAGGCTTAATAGATTCGTCTCGCCGTTTAGATTCCACTTATGTAATTGGTTTTGTAAATAGTCTACGTTTACTACTCCTAATTAGTATCTAAACATTCGATGTGACACGTGCTAAAAATAAGACACGGGAAGAAAACGCCCC	366
ba336	DEL	Chr1	30575529	30575872	GGCTGTTTGGATACAAGGTGTTAAACTTTAACAGTGTCACATCGGATGTTCGGATACTAATTAGGAGGACTAAACATGAGCTAATTATAAAACTAACTGCAGAACCCCTATACTAATTCGCGAGACGAATCTATTAAGCCTAATTAATCCATCATTAGCAAATGGTTACTGTAGCACCACATTGTCAAATCATGGACTAATTAGGCTTAATAGATTCGTCTCGCGAATTATACTCCATCTGTACAATTAGTTTTGTAATTAGCTTATATTTAGTACTCCTAATTAGCATCCAAACATCCGATGTGACAGGTGTTAAAGTTTAATAGGGTGTTCCCAAACACCC	362
ba337	DEL	Chr1	30586220	30586334	TGGTGCCACCTTACCAAACTAGATTTCACAAATTTCTTTTGGTGTCACTGCAATCAGCAGACTGCAGGGAGGCGTTTTCTTGTTATCAAATATGCAGTGCAAGAAAATATATAT	126
ba341	DEL	Chr1	30639552	30640067	CTTTGTTCCTTTGGCAGCTTAAGAAATCAAACCATCGGGTATTAAAGTGGCTCCGTCGGCTGCGGTGGTAAGCCGCCTTCTCTTCTGCGGATGATAGCATGCTATTCTTCAGAGCAAATAGAGAGCGATCAATATATGCATTCCCAATTACCCTTAGGCCCCGTTTGGAACCCTTCATTTTGAAGGAATTGGAATCTATTTAATGGAGTAGACTAATTTATCTTGGAATGTGGGATTCCACAACTTTCCAAAGTTTAGATATAAGCCTATGTTAAATTCATAGGGTGGGAGATGGAAATTGATTCTATAGATTATGATTATTAGAATGGAATTTAATTCTTATAGCACGCTCTTCGACTCGCTTCTATTTAGCAGAAATGCAGCACATAAGTATCTCTC…	377
pD776	DEL	Chr1	30639702	30640073	CCCTTAGGCCCCGTTTGGAACCCTTCATTTTGAAGGAATTGGAATCTATTTAATGGAGTAGACTAATTTATCTTGGAATGTGGGATTCCACAACTTTCCAAAGTTTAGATATAAGCCTATGTTAAATTCATAGGGTGGGAGATGGAAATTGATTCTATAGATTATGATTATTAGAATGGAATTTAATTCTTATAGCACGCTCTTCGACTCGCTTCTATTTAGCAGAAATGCAGCACATAAGTATCTCTCTCATATGACTAACAATAATATACAAATATATTCCACATACGATTATATTAGCTTAATTAATTTATTTTTAAATTATGATTATTAGAATGGAATTCAATTCCAAGGATCCAAACGGGGCCTTA	365
pD791	DEL	Chr1	30732042	30732407	ATAAGAGCAACTCCAAGAGACTGCTAATCTTACCCCCAATACTTTTTTTAGGAAAAAAGAGAGAAAAAATGAACTCCAACAATCCACCTAAACCTTCCCCAATTTTTTAGCGACGCTAAAAAACAGCCTGCCACCGTGTATATTTTAGCGTTGGCGTTCCTCCCCCAATCCTGATTCCCGCACGCCCGCGCGTCCCTTCCGATGGGCCCAATATGATAACTTGGCCTGTGTTTGAAATATTAGGGGCTATTTATTAGCGATCTGCTGTGGACTGATATGTTTTTGAGGGAAATTTTTTTTAGGAGAATCCCCAATACATAGTTTTGGGGAAGAATTTTTTAGGATACTCTTGGAGTTGCTCTAAG	360
ba347	DEL	Chr1	30820714	30821035	TAAAGTTTAACACCCGTCACATCGGATGTTTGGATGCTAATTAAGAGTATTAAATATAGGCTAATTACAAAACTAATTGCATAGATGGAGTGTAATTCGCGAGACGAATCTATTAAGCCTAATTAGTCCATGATTTGACAATGTGGTGCTACAGTAACCATTTGCTAATGATGGATTAATTAGGCTTAATAGATTCGTCTCGCGAATTAGCACAGGGTTCTGCAATTAGTTTTATAATTAGCTCATATTTAGTTCTTCTAATTAGCATCCGAACATCCGATGTGACACTGTTAAAGTTTAACACCTCGTATCCAAACACCC	344
ba348	DEL	Chr1	30862878	30863038	GCTATAGGCGTGTAACCCAAAACTCTTAAGATAGTGAGATTGTTGCTGGCTAGTGCCCGTGGTTTTTCCCCTTCACATCGGAGGGGTTTTCCACGTTAAATCGTGTGTCTCCTCTGTGGCTTAATTCTTTACTTCATATTTCTATACGTCGTTCATAACA	176
ba352	DEL	Chr1	30874864	30875134	CACAAACGTACCATAGCTGATTTGGAAACGATAAGTTTCACAAGTAAACCATTAGCCCATTACACGTGCTGAGTTTTAGGCTCCCTTTGGCACGGCTCATCCCAAAACGGCTTCACCGGTGAAGCCAAAGCCGGTGAAGCTAAAAAAACTGGTTTCACCCGGCTTCTAGTTCATTTTAGTCCCGGCTTACAAAACAGCTTCACGCTACAGTGTCTCGATTTGCGTGAAATAGATGAAGCTAAAGTCGAAATAAGCCGTGCCAAAGAGGGC	197
ba353	DEL	Chr1	30875367	30875640	GGCCGTGTTTAGTTGGGGAATTTGGGAGGTGCCAAATTACTGTTACAGCACTGTAGCACACTGTAGCGTTTCGTTTGTATTTGTGAATTATTGTCCAAATATTGACTAATTAGGCTCAAAAGATTCGTCTCGCAAAGTACAACAAAACTGTGCAATTAGTTTTTAATTTCATCTACATTTAGTACTCCATGCATGTACCGCAAGTTTGATGTGATGGGGAATCTTCTTTTTGCATAGTGTCAAAGTTGGGAGTTGGGAGTAACTAAACATGGC	272
ba360	DEL	Chr1	30891695	30891839	TTTCTGATTAGATGCTGCACATTATTGATGCAATGCTCATCTCCAAGAAGAATGCAAGGGTTTTATTCAAGCAAAGCTCAAACAGACAAGGGCGGATGCAGGATGGGAGGTTTGGCGGGGGGGGGGGGGGGGGTTCATTTCCCT	167
ba369	DEL	Chr1	31394575	31394926	ATTCCCAGCTCGGGCCTTGTTTAGTTGCCCAACTTTAGACAACCCAAATTCCTGTAGCAACACTGTAGCGTTTCGTTTGTATTTGTGAATTATTGTCCAAACATTGACTAATTAGGCTCAAAAGATTCGTCTCGCAAAGTACAACAAAACTGTGCAATTAGTTTTTAATTTCGTCTACATTTAGTACTCCATACATGTACTGCAAGTTTGATGTGACGAAGAATCTTCTTTTTGCATAGTGCCAAAGTTGTAAGTTGGGGGTGAAGTAAACAAGACCTCGATTCCACCATGGCCATGGTAGAGCCGCCGCCCGCCGACAATCTCTTCAGACTTAAAAGAAACTACAGCAGT	278
ba370	DEL	Chr1	31395519	31395861	GGTGTTTGGTTCCCTTTGCTTATTTTTAAGTAAGTGTCACATCAATGTTTAGATACTAATTAGGAGTATTAAACGTAGGCTATTTACAAAGCCCATTACATAAGTAGAGGCTAAACAGCGAGACGAACCTATTAAGCCTAATTAATCCATCATTAGCAAATGTTTACTGTAGCAACGCATTGTCAAATCATGGACTAATTAGACTTAATAGATTCGTCTCGCCGTTTAGCCTCCACTTATGTAATCGGTTTTGTAAATAGTCTACGTTTAATACTCCTAATTAGTATATAAACATTCGATGTGACGGGTGCTTAAAAATAAGCAAACGAACCAAACCAGGCC	341
ba375	DEL	Chr1	31509473	31509832	AGACAGGACCCGTGGCCGACCAAAATTCGCCTGCATTTACAGTCCAATAACGGCGCTCCTTGGCAGTCAGGCAAGCAGCCTACCTGGGCCATGTTTAGTTAGCCCCAAATTCCCAACTTTGACACTATGCAAAAAGAAAATTCCCCATCACATCAAACTTGCGGTTCATGCATGGAGTACTAAATGTAGACGAAATCAAAAACTAATTGCACAGTTTTGTTGTACTTTACGAGACGAATCTTTTGAGTCTAATTAGTCAATGTTTGGACAATAATTCACAAATACAAACGAAATGCTACAGTTGTGCATTTATGGCAAAATCCCAACTTTGACACTCCCAAATTGGGAACTAAACAAGG	263
ba376	DEL	Chr1	31525883	31526297	TTTAACACCCGTCACATCGGATGTTTGGATGCTAATTAGAAGTATTAAATATAGACTAATTACAAAACTAATTGCACAGTTGGAGTGTAATTCGCGAAACGAATCTATTAAGCCTAATTAGTCCATGATTTGACAATGTGGTGCTACAGTAACCATTTGCTAATGTTGGATTAATTAGGCTTAATGGAATCGTCTCGCGAATTAGCACAGGGTTCTGCAATTAATTTTATAATTAGCTTATGTTTAGTTCTTCTAATTATCATCCGAATATCCGATGTGACACTGTTAAAGTTTAGCACCTCGTATCCAAACACCCCCTGAGCCTCCGGGTAGTTTGCGATAAAATATTTTAGACCAGTCGATAAGAACTTTTTATGCTTGTTAGCTTTCAAAAATGTA…	334
ba379	DEL	Chr1	31583924	31584122	TTTGATACCCGTGCTAAACTTTAGCACCTGTCACATCGGATGTTCGGATGCTAATTAGGAGGATTAAATATAATTTAATTATAAAACTAATTGCACAGATGGAGTCTAACTCGTGAGACGAATCTATTAAGGGTAATTAATCCATCATTAACAAATGATTACTGTAGCACCACATTGTTAAATCATGAACTAATTAGG	175
ba380	DEL	Chr1	31587623	31588157	TATATTTTCTCCAAAGAGTTGTTCCAGCATTTTCATCTAAGAACCTGACAAGAGTATTTTTCCCGGTGATGTTCTTTAGGCGAGAGACTCTGAAATCTATGAGAACCGTGACACAGCAGGTGAATAACCAAATATTTTGTGGCAAATCATTTCTTAAAAAAGGGAGATTGTCGGTGGTTTCAAGCATTTGCCATCTATGGGCCTGTTCGCTTCAGCTTATTCAACCGGCTTATCAGCCACCAAACAGTATTTTCCTCTCACAACAAATCAGCCGTTTCAGCTTTTCAGCCAACTTATAAGCTGAAGCGAACAGGCCCTATGTATTCTTTTCTCTCTTTTCATCGCGACTGCGAGGGGGTGACTTGCCCTACCTGGTAGCCTGCTACGCAGAGGTTGGAG…	132
pD890	DEL	Chr1	31664317	31664443	ACAACTCATGCATTATTCAATCTATAATAGGGTCGCAGGGACACTTTAACCCCAAATGTCATTTTGGTTGGGTGGTTAAGGTGAGCTTATCCCTCTATTCTTGTTCTTTCTTTTGTACTCTTGCAA	122
ba384	DEL	Chr1	31708015	31708290	TCGGCCTTGTTTAGTTGGGGAATTTGGGAGGTGCCAAATTATTGTTACAGCACTGTAGCACACTGTAGCGTTTCGTTTGTATTTGTGAATTATTGTCCAAATATTGACTAATTAGGCTCAAAAGATTCGTCTCGCAAAGTACAACAAAATTGTGCAATTAGTTTTTAATTTCATCTACATTTAGTACTCCATGCATGTACCGCAAGTTTGATGTGATGGGAAATCTTCTTTTTACATAGTGTCAAAGTTGGGAGTTGGGAGTAACTAAACATGGC	272
ba390	DEL	Chr1	31977482	31977790	ACGTAATCTGATTACTGAAGGTAACAAATCCCATTACATATGTTTGGTTGCGGTGGTTTGTAATCAATTGACACTGTAATCGAATCCCTTACCTAAATAATATCTATACAAGTTTGTTACCCCTCCTCCCCCACCGTAATCAGATATAGCACTCACACAGTAATCTGATTACGTTACCAGAGTGCAACCAAACAAAGAGGGCAATCACCTATTCCACCTCCAAATACACTGTAATCTGATTTCCTTTGCGTTTACATTACCTTAGCACGAACCAAACACTATCTAATATATACTCCTGCCCCAAAGTG	301
ba393	DEL	Chr1	32009922	32010414	TCGGGATAGATTCTTAGTTTGCATAGAATGGAGGAAGACGGACTCCTACTAGATTTTTTCTGTAATTTTACTAGGATTCATACCATATAATCCTACATATAATCCTACTAAGATTTCTCCTTATAGCCGACTAGTAATCCTGCCCCCGGAGTATATAAAGGAGGGTAGAGGTTCTTAGATCGGTAGGCCAAGACCTCATGGAAATATAACGGAGGACCAAATCATCAACACTAAACAACATCCAAGCGCAGGGCGCAATATATTACACTACAAACAGGACGTAGGGTATTACGCTACTCTGGCAGTCCGAACTTGTATAAATCAGTGTCAATCCGTGTCTTGTGTTCTCGCTTTTACCTTCGAGTTTCAGGTCCGACGATTCCTCATCAATCAATTTAC…	340
ba402	DEL	Chr1	32214243	32214577	ATAGCAGGTGCTAAACTTTAGCAGTGTCACATTGGATATTCAGATGCTAATTAGGAGGACTAAACATTAGCTAATTGCAAAACTAATTACACAGATGGAGTCTAATTTGCGAGACGACTCTATTAAGCCTAATTAATTCATCATTAGCAAATGGTTACTGTAGCACCACATTATCAAATCATGGACTAATTAGGCTTAATAGATTCATCTCGCGAATTAGACTCCATCTGTGCAATTAGTTTTGTAATTAGCCTATGTTTAATACTCCTAATTAGTATCCAAACATCCGATGTGACGGGTGCTAAACTTTAGCACCTTGGAGCCAAACAGCCCC	241
pD961	DEL	Chr1	32214869	32214987	GCAGCACCTATAACCATATAGAGACAAGCTTTTTAAAGGATATCATCTATAGAGGGGGGGGGGGGGGTTCCAATTAATAAGCTGATCAGTGTGCTCTTCAGCAAGTGAACAACCTTCA	115
ba408	DEL	Chr1	32395421	32395746	GGTAGAGCTTCGGCTTATCATAAAACGGCTTCGGCTTCGGCTTTTTCGGTGGAGTGGCTTTTTTAGTGAAGCTGAAGCCGTTTTGCAAAACATTTGGTAAAACGGCTTCTCAATGGCAATATATGTAATTTTATGATCACTTAATGCTTGGAGAGGGAGGAGAAGCCGGTGAAGCCACTTTTTTCGGCTTCTCCTCTCTAGTGTAAGCCATTTTGCGGCTTCTCCCCGGCTTTGGTGGTGAAGCCGTTTTGAAATTGACCCTTTGGTAGGGCTTCACCAAAAGCCGGTGGAGAAGCACTTTGAGAAGCCCTACCAAACGGGGCCT	325
ba410	DEL	Chr1	32493786	32494076	TTAGATATTAATTAAGAGTATTAAACGTAAACTAATTACAAAATCAATTGCACAGATGGAAACTAATTTGCGAGACGAATCTATTAAGTCTAATTAGTTCATGATTTGACAATGTGATGCTACAGTAAATATGTGCTAATGATGGATTAATTAGGTTTAATAGATTCATCTCGTGAATTAACCTCCATCTGTGTAATTAGTTTCATAATTAGCTCATATTTAATCCTCCTAATTAACATCCGAATATTTAATGTGATATGAATTTTAGGATGTCCCAGAAAACCAAACAC	266
ba411	DEL	Chr1	32494438	32494856	AACCGTGCGTGCAATGCAACCACGAAAGCACGGTGAACAGGCATGGAAACTTGGAAAGGGAGGCAAAACATGGTACTTCCAGAAGCATGTCATGGGAGTTTGGAGTTTTGAGCTCGATGGCGTGGGCCAGATTGGGTGGATATAGCCTTCAGCCTTGTTTAGTTGCTCAACTTTAGGGTGCCAAAATTATTGTAGCGTAACTGTAGTGTTTCGTTTGTATTTGTGAATTATTGTCCAAATATTGACTAATTAGGCTCAAAAGATTCGTCTCGCAAAGTACAACAAAACTGTGCAATTAGTTTTTTATTTCGTCTACATTCAGTACTCCATGCATGTACCGCAAGTTTGATGTGATGGAGAATCTTCTTTTTGCATGGTACCAAAGTTGGAATTTTGAAG…	286
ba414	DEL	Chr1	32603405	32603647	TGTAGCACACTGTAGCGTTTCGTTTGTATTTGTGAATTATTGTCCAAATATTGACTAATTAGGCTCAAAAGATTCGTCTCGCAAAGTACAACAAAACTGTGCAATTAGTTTTTAATTTCATCTACATTTAGTACTCCATGCATGTACCGCAAGTTTGATGTGATGGGGAATCTTCTTTTTGCATAGTGTCAAAGTTGGAAGTTGGGAGTAACTAAACATGGCCTAACTAAACATGGCCTGAC	294
ba417	DEL	Chr1	32668253	32668606	GGGGTGTTTGGGAGGAGGGGGCTAAATTTTAGCCCCCGTCACATTGAATGTTTGGACACTAATTAGGAGTATTAAACTTAGATTAATTACAAAACTAATTACACAACCCCTAGGCTAAATCGCGAGACGAATCTATTAAGCCTAATTAGTGCATGATTTGACAATGTGGTGCTACAGTAACCATTCACTAATGATGGATTAATTAGGCTCAATAGATTCGTCTCGCGATTTAGCCTAGGGGTTCTGCAATTAGTTTTGTAATTAGCTTATGTTTAGTCCTCTTAATTAGTATCCGAACATCCGATGTGACAGGGCTAAAGTTTAGCCTCCTCCTTCCAAACAGCCCCTATATC	352
ba418	DEL	Chr1	32678297	32678634	CCTGATGATGCGATCCGATGTTGGCAATTTCAGCTGCAATAGGAGCCAGATGAAGAAACAACACTTGGTTCTTGTTTAGTTTCCAAATTGGGAGTGGCAAAGTTTACATTTTGTCATAAATGCGCAACTGTAGCATTTCGTTTGTATTTGTGAATTATTGTCCAGACATTGACTAATTAGGCTCAAAAGATTTGTCTCGCAAAGTACAACAAAACTGTGCAATTAGTTTTTGATTTCATCTACATTTAATACTCCATGCATGTACCGCAAGTTTAATATGATAGCGAATATTCTTTTTGCATAGTGTCAAATTTAGGAAAAGGGGACTAAACAACGC	279
ba419	DEL	Chr1	32692383	32692728	TTAGGGGGTGTTTGGGAAACACCTGTTAAAGTTTAACACCTGTCACATCGGATGTTTGGATGCTAATTAGGAGTAGTAAACATAAGCTAATTACAAAACTAATTGCACAGATGGAGTATAATTCGCGAGACGAATCTATTAAGCCTAATTAGTCCATGATTTGACAATGTGGTGCTACAGTAACCATTTGCTAATGATGGATTAATTAGGCTTAATAGATTCGTCTCGCGAATTAGCACAAGGTTCTGCAATTAGTTTTATAATTAGCTCATGTTTAGTCCTCCTAATTAGCATCCGAACATCCGATGTGACACTGTTAAAGTTTAGCACCTCGTATCCAAACAG	354
ba421	DEL	Chr1	33035327	33035676	CATTCAATTTTTATCTATTAAACACCTGTTAAAGTTTAACACCTGTCACATCGGATGTTTGGATGCTAATTAGGAGTAGTAAACATAAGCTAATTACAAAACTAATTGCACAGATGGAGTATAATTCGCGAGACGAATCTATTAAGCCTAATTAGTCCATGATTTGACAATGTGGTGCTACAGTAACCATTTGCTAATGATGGATTAATTAGGCTTAATAGATTCGTCTCGCGAATTAGCACAAGGTTCTGCAATTAGTTTTATAATTAGCTCATGTTTAGTCCTCCTAATTAGCATCCGAACATCCGATGTGACACTGTTAAAGTTTAGCACCTCGTATCCAAACAGC	315
ba424	DEL	Chr1	33100087	33100334	GTGAAACGATCTCATGATTCAGCGATCAGAACACGACGGCTCCAGGTCTGGTGTCCGCTGCCCAGCATCCGGCGTCAAGCAATATATATCCACTGATCAGGTTGATTAGAACCCGGTGCGCGGCCGTGGAAGCTAAAGCTAGGCTGCCGTGGTTCCAGCAGAAATCCACCGCTGGGGAGCGAGGGCCCCAGGCCCCAGCAGCGTCGTTGGCCACCCGTGCCAACAAGCTCCGACCGGCGGGTGAAAC	243
ba426	DEL	Chr1	33193845	33194177	ATACGAGGTGTTAAACTTTAACAGTGTCACATCGGATGTTCGGATGATAATTAGGAGAACTAAACATGAGCTAATTATAAAACTAATTGCAGAACCCTGTGTTAATTCGCGAGACGAATCTATTAAGCCTAATTAATCCATCATTAGCAAATGGTTACTGTAGCACCACATTGTCAAAATCATGGACTAATTAGGCTTAATAGATTCGTCTCGTGAATTATACTCCATCTGTGCAATTAGTTTTGTAATTAGCCTATATTTAATACTCCTAATTAGCATCCAAACATCCGATGTGACGGGTGTTAAAGTTTAACAGCTGGTTGCCAAACAGG	355
ba427	DEL	Chr1	33240498	33240795	TGGATGCTAATTAGGAGTACTAAACATAAGCTAATTACAAAACTAATTGCACAGATGGAGTATAATTCGCGAGACGAATCTATTAAGCCTAATTAGTCCATGATTTGACAATGTGGTGCTACAGTAACCATTTGCTAATGATGGATTAATTAGGCTTAATAGATTCGTCTCTCCAATTAGCACAAGGTTTTGCAATTAGTTTCATACTTAGCTCACGTTTAATCCTCCTGATTAGCATCCAAACATCCGATGTGACACTGTTAAAGTTTAGCACTCGTATCCAAACAGCCCTTTAGT	354
ba429	DEL	Chr1	33383082	33383648	GCCGGGCAGGCGCACCATGCTTTGTTCATATGTCTGTTGCTATTATGAACTTCTTATGCAGCGTCCATGTGAGGATGCACCATGGTTATGAGCTAATGACAATACTAAAGGCCCTAATTGGAGGATATATTATCTCATGTAGCGCTTAAATATTTTGTTAATCGTACATTTGAATGGCTGCAAGTTGCAGATTGCCTGTCATCTGGAGGATATGTTATCCCCACGCTTATTTACAGCCTGTTCGCTTCAGCTTATTCAGCCGGCTTATCAGCCACCAAACAGTGTTTTCCTCTCACAACAAATCAGCCGTTTCAGCTTTTCAGCCGGCTTATAAGCTGAAGTGAACATGCCCTTAGTGGCCTTGTATTTGTTTTTCTGAAACTTAAAGTCATGTTCCTG…	117
ba430	DEL	Chr1	33384959	33385128	ACTGCTCATACTCATAAGTCATAACCCACAAGCCCCACAGCAATGGTTGCGGCCTGTTCGCTTCAGCTTATTCAGCCGGCTTATCAGCCACCAAACAGTGTTTTTCTCTCACAACAAATCAGCCGTTTCAGCTTTTCAGCCAGCTTATAAGCTGAAGCGAACAGGCTCT	117
ba432	DEL	Chr1	33633384	33633719	AACACCTGTTAAAGTTTAACACCTATCACATCGGATGTTTGGATGCTAATTAGGAGTACTAAACATAAGCTAATTACAAAACTAATTGCACGGATGGAGTATAATTCGCGAGACGAATCTATTAAGCCTAATTAGTCCATGATTTGACAATGTGGTGCTACAGTAACCATTTGCTAATGATGGATTAATTAATTAGGCTTAATAGATTCGTCTCGCGAATTAGCACAAGGTTCTGCAATTAGTTTTATAATTAGCTCATGTTTAGTCCTCCTAATTAGCATCCAAACATCCGATGTGACACTGTTAAAGTTTAGCACCTCGTATCCAAACAGCCC	361
ba437	DEL	Chr1	34125197	34125520	TTAAAGTTTAACACCTGTCACATCGGATGTTTGGATGCTAATTAGGAGTACTAAACATAAGCTAATTACAAAACTAATTGCACAGATGGAGTATAATTCGCGAGACGAATCTATTAAGCCTAATTAGTCCATGATTTGACAATGTGGTGCTACAGTAACCATTTGCTAATGATGGATTAATTAGGCTTAATAGATTCGTCTCGCGAATTAGCACAGGGTTCTGCAATTAGTTTTATAATTAGCTCATGTTTAATCCTCCTAATTAGCATCCGAACATCCGATGTGACACTGTTAAAGTTTAGCACCTCGTATCCAAACAGCAC	345
ba438	DEL	Chr1	34257773	34258135	TACGAGGTGCTAAACTTTAACAGTGTCACATCGGATGTTCGGATGCTAATTAGGAGGACTAAACATGAGCTAATTATAAAACTAATTGCAGAACCTTGTGCTAATTCGCGAGACGAATCTATTAAGCCTAATTAATCCATCATTAGCAAATGGTTACTGTAGCACCACATTGTCAAATCATGGACTAATTAGGCTTAATAGATTCGTCTCGCGAATTATAATCCATCTGTGCAATTAGTTTTGTAATTAGCTTATGTTTAGTACTCCTAATTAGTATCCAAACATCCGATGTGACAGGTGTTAAACTTTAACAGGTGTTTCCCAAACACCCCCTATGTATTTGTATCGTATTTCCTGTGGAC	352
ba440	DEL	Chr1	34307048	34307300	GGTGCTAAATTACTGTTACAGCACTGTAGCACACTGTAGCGTTTCGTTTGTATTTGTGAATTATTGTCCAAATATTGACTAATTAGGCTCAAAAGATTCGTCTCGCAAAGTACAACAAAACTGTGCAATTAGTTTTTAATTTCATCTACATTTAGTACTCCATGCATGTACCGCAAGTTTGATGTGATGGGGAATCTTCTTTTTGCATAGTGTCAAAGTTGGGAGTTGGGAGTAACTAAACATGGCCGAAGT	280
ba441	DEL	Chr1	34349783	34350103	ACTTTAACAGTGTCACATCGGATGTTTGGATGCTAATTAGGAGGACTAAACATGAGCTAATTATAAAACTAATTGCAGAACCTTGTGCTAATTCGCGAGACGAATCTATTAAGCCTAATTAATCCATCATTAGCAAATGGTTACTGTAGCACCACATTGTCAAATCATGGACTAATTAGGCTTAATAGATTCGTCTCGCGAATTATACTCCATCTGTGCAATTAGTTTTGTAATTAGCTTATGTTTAGTACTCCTAATTAGCATCCAAACATCCGATGTGACAGGTGTTAAACTTTAACAGGTGTTTCCCAAACACCCCC	345
ba442	DEL	Chr1	34400750	34401133	ATTTGATGAATAAGGGGGTGTTTGGATACGAGGTGCTAAACTTTAACAGTGTCACATCGGATGTTCGGATGCTAATTAGAAGAATTAAACATGAGCTAATTATAAAATTAATTGCAGAACCCTGTGCTAATTCGCAAGACGAATCTATTAAGCCTAATTAATCCACAATTAGCAAATGGTTACTGTAGCACCACATTGTCAAATCATGGACTAATTAGGCTTAATAGATTCGTCTCGCCAATTACACTCCAACTGTACAATTAGTTTTGTAATTAGTCTATATTTAATACTTCTAATTAGCATCCAAACATCCGATGTGACGGGTGTTAAACTTTAATAGGGTGGAGCCAAACAGGCCCTAAATATCTAGATAATGTTTTGGA	342
ba443	DEL	Chr1	34477235	34477561	AAATTTTAGCACCTGTCACATCGTATGTTTGGACACTAATTAGGAGTATTAAACGTAGTCTAATTATAAAACTAATTGCACAACCCCTAAGCTAAATCGCGAGACGAATCTATTAAGCCTAATTAATTCATCATTAGTGAATGGTTACTGTAGCACCACATTGTTAATTCATGGACTGATTAGGCTTAATAGATTCGTCTCGCGATTTAGCCTAGGGGTTGTGCAATTAGTTTTGTAATTAGACTATGTTTAATACTCCTAATTAGTGTCCAAACATTCGATGTGACATGTGCTAAAATTTAGCACATGCCTCCCAAACACCCCCT	348
ba444	DEL	Chr1	34478411	34478748	GATACACCCTACTAAATTTTAGCACCTGTCACATCGAATGTTTGGATACTAATTAGGAATATTAAACATAGTCTAATTATAAAATTAATTGTACAAATGGAGTCTAATTCGCGAGACGAATCTATTAAGCCTAATTAGTTCATGATTTGACAATGTGATGCTACAGTAACCATTTACTATTGATGGATTAATTAGCCTTAATAGATTCGTCTCGCAAATTAGACTCCATCTGTGCAATTATTTTTGTAATTAGCTCATGTTTAGTCCTCCTAATTAGCATCTGAACATCCGATATGACTCTGCTAAAGTTTAGCATCTCGTATCCAAACACCCCCTT	346
ba445	DEL	Chr1	34479547	34479925	CAGGCTGTGTTGCCGCGTCAGTGCGTCACCGTCAGTGTTCGCGTCCCATTACTCCCAGGTCCCAGCCCAATCGCCCCGGGACTGACAGCATCAGCTCACCTCGCCTTGTTTAGTTCCCAATTTGGGAGTGCCAAAGTTGGGAGTTTGTCATAAATGCGCAACTGTAGCATTTCGTTTGTATTTGTGAATTATTGTCCAAAAATTGACTAATTAGGCTCAAAAGATTCGTCTCGCAAAGTACAACAAAACTGTGCAATTAGTTTTTGATTTCATCTACATTTAGTACTCCATGCATGTATCGCAAGTTTGATGTGATGGGGAATCTTCTTTTTGCATAGTGTCAAAGTTGGGATTTTGGTGGAAACTAAACATGGCCTC	287
ba446	DEL	Chr1	34558586	34558918	GGAACACCCTGTTAAAGTTTAACACCTGTCACATCAGATGTTTGGATACTAATTAGGAGTATTAAACATAGGCTAATTATAAAACTAATTGCACGGATGGAGTATAATTCGCGAGACGAATCTATTAAGCCTAATTAGTCCATGATTTGACAATGTGGTGCTACAGTAACCATTTGCTAATGATGGATTAATTAGGCTTAATAGATTCATCTCGCGAATTAGCACAGGATTCTGCAATTAGTATTATAATTAGCTCATATCTAGTCCTCCTAATTAGCATCCGAACATCCGATGTGACACTGTTAAAGTTTAGCACCTCATATCCAAACACC	344
ba447	DEL	Chr1	34597588	34597843	CAAACTCCCAATTTTGACACTATGCAAAAAGAAGATTCCCCGTCACATCAAACTTGCGATACATGCATGGAGTACTAAATGTAGATAAAATTAAAAACTAATTGCACAGTTTTGTTGTACTTTGCGAGACGAATCTTTTGAGCCTAATTAGTCAATATTTGGACAATAATTCACAAATACAAACGAAACGCTACAGTGTGCTACAGTGCTACAGCAGTAATTTTGGACACCCAAATTCAGGGCAACTAAACAAGG	280
ba449	DEL	Chr1	34867197	34867532	GGCAACCAGCTGTTAAACTTTAACACCCGTCACATCGGATGTTTGGATGCTAATTAGGAGTATTAAATATAGGCTAATTACAAAACTAATTGCACAGATGGAGTATAATTCACGAGACGAATCTATTAAGCCTAATTAGTCCATGATTTTGACAATGTGGTGCTACAGTAACCATTTGCTAATGATGGATTAATTAGGCTTAATAGATTCGTCTCGCGAATTAACACAGGGTTCTGCAATTAGTTTTATAATTAGCTCATGTTTAGTTCTCCTAATTATCATCCGAACATCCGATGTGACACTGTTAAAGTTTAACACCTCGTATCCAAACACCC	356
ba454	DEL	Chr1	35013205	35013551	GGGGGTGTTTGGATACGAGGTGTTAAACTTTAACAGTGTCACATCGGATGTTCGGATGCTAATTAGGTGAACTAAACATGAGCTAATTATAAAACTAATTGCAGAATCTTGTGCTAATTCGCGAGATGAATCTATTAAGCCTAATTAATCCATCATTAGCAAATGGTTACTGTAGCACCACATTGTCAAATCGTGGACTAATTAGGCTTAATAGATTCGTCTCGCGAATTACACTCCATCTGTGCAATTAGTTTTGTAATTAGCTTATGTTTAATACTTCTAATTAGCATCCAAATATCTGATGTGACGGGTGTTAAACTTTAACACCTAGTTGCCAAACAGGCCC	343
ba456	DEL	Chr1	35113280	35113582	TTATTTTTAGCACGTGTCACATCGAATGTTTAGATACTAATTAGGAGTAGTAAACGTAGACTATTTACAAAACCAATTACATAAGTGGAATCTAAATGGCGAGACGAATCTATTAAGACTAATTAAGCCTAATTAATCCATCATTAGCAAATATTTACTGTAGCAACACATTGTCAAATCATGGACTAATTAGGCTTAATAGATTCGTCTCGCCGTTTAGATTCGTCTTATGTAATGGGTTTTGTAAATAGTCTACGTTTAATACTCCTAATTGGTATCTAAACATTCGATGTGACGGCTGC	362
ba457	DEL	Chr1	35297144	35297493	TTGGGCCTGTTTGGCTCCCTGGTGTTAAAGTTTAACACCCGTCACATCGAATGTTTGGATGCTAATTAGGAGTATTAAACATAGACTAATTACAAAACTAATTGCATAGATGGAGTGTAATTCGTGAGACGAATCTATTAAGCCTAATTAGTCCATGATTTGACAACGTGGTGCTACAGTAACCATTTGTTAATGATGGATTAATTAGGCTTAATAGATTCGTCACGTGAATTAGCACAGGATTATGCAATTAGTTTTATAATTAGCTCATGTTTAGTTCTCCTAATTAGCATCCGAACATCCGATGTGACACTGTTAAAGTTTAGCACCTCGTATCCAAACACCCCCA	350
ba458	DEL	Chr1	35417886	35418220	GAACACATGTAACGCGTCGCCATACCATATGGGGCCATGTTTAGTTACTCCCAACTTCCAACTTTGACACTATGCAAAAAGAAGATTCCCCATCACATCAAACTTGCGGTACATGTATGGAGTACTAAATGTAGATGAAATTAAAAAGTAATTGTACAGTTTTGTTGTACTTTACGAGACGAATCTTTTGAGCCTAATTAGTTAATATTTGGACAATAATTCACAAATACAAACGAAACGCTACAGTGTGCTACAGTGCTGTAACAGTAATTTGGCACCTCCCAAATTGGCCAACTAAACAAGGCCTGGCTTGCGCTCTTGGACCTGCTGGTCG	281
ba459	DEL	Chr1	35422950	35423237	GGGAAGTGCACTCGAGGCCTTGTTTAGTTGGGGAATTTGGGAGGTGCCAAATTACTGTTACAGCACTGTAGCACACTGTAGCGTTTCGTTTGTATTTGTGAATTATTGTCCAAATATTGACTAATTAGGCTCAAAAGATTCGTCTCGCAAAGTACAACAAAACTGTGCAATTAGTTTTTAATTTCATCTACATTTAGTACTCCATGCATGTACCGCAAGTTTGATGTGATGGGGAATCTTCTTTTTGCATAGTGTTAAAGTTGGGAGTTGGGAGTAACTAAACATGG	248
ba460	DEL	Chr1	35425255	35425609	GATCTAGGGCCTGTTTGGCAACCATGTGTTAAAGTTTAACACCTGTCACATCAGATGTTTGGATGCTAATTAGGAGTATTAAACATAGGCTAATTACAAAACTAATTGCACAGATGGAGTGTAATTCACGAGACGAATCTATTAAACCTAATTAGTCCATGATTTGACAATGTGGTGCTACAGTAACCAATTGCTAATGATGGATTAATTATGCTTAATAGATTCGTCTCGCGAATTAGCACATGGTTCTGCAATTGGTTTTATAATTAGCTCATGTTTAGTTCTCCTAATTAGCATCCGAACATCCGATGTGACACTGTTAAAGTTTAACATCTCGTATCCAAACACCCCCCT	353
ba466	DEL	Chr1	35659388	35659610	AGCACACTGTAACGTTTCGTTTGTATTTGTGAATTATTGTCCAAATATTAACTAATTAGGCTCAAAAGATTCGTCTCACAAAGTACAACAAAACTGTGCAATTAGTTTTTAATTTCATCTACATTTAGTACTACATGCATGTACCGCAAGTTTGATGTGATGGGGAATCTTCTTTTTGCATAGTGTCAAAATTGGGAGTTGGGGAGTAACTAAACATGGCCC	282
ba467	DEL	Chr1	35677161	35677438	AGGCCGTGTTTAGTTGGGGAATTTGGGAGGTGCCAAATTACTGTTACAGCACTGTAGCACACTGTAGCGTTTCGTTTGTATTTGTGAATTATTGTCCAAATATTGACTAATTAGGCTCAAAAGATTCGTCTCGCAAAGTACAACAAAACTGTGCAATTAGTTTTTAATTTCATCTACATTTAGTACTCCATGCATGTACCGCAAGTTTGATGTGATGGGGAATCTTCTTTTTGCATAGTGTCAAAGTTGGGAGTTGGGAGTAACTAAACATGGCCTG	288
ba469	DEL	Chr1	35734140	35734484	GGCTCCACCCTATTAAAGTTTAACACCTGTCACATCGGATGTTTGGATGCTAATTAGAAGTATTAAATATAGACTGATTACAAAACTAATTGCACAGTTGGAGTGTAATTCGCGAGACGAATCTATTAAGCCTAATCAGTCCATGATTTGATAATGTGGTGCTACAGTAACCATTTGCTAATGGTGAATTAATTAGGCTTAATAGATTCGTCTCGCGAATTAGCACAGGGTTCTGCAATTAATTTTATAATTAGCTTATGTTTAATTTTTCTAATTAGGATCCGAACATTCGATGTGACACTATTAAAGTTTAGCACCTCGTATCCAAACACCCCCTAATAGAT	370
ba471	DEL	Chr1	35860345	35860688	TTGGATACGAGGTGTTAAACTTTAACAGTGTCACATCGGATGTTCGGATGCTAATTAGGAGAACTAAATATGAGCTAATTATAAAACTAATTGCAGAACCCTGTGCTAATCCGCGAGACGAATCTATTAAGCCTAATTAATCCATCATTAGCAATTGGTTACTGTAGCACCACATTGTCAAATCATGGACTAATTAGGCTTAATAGATTCGTCTCGTGAATTACACTTCATCTGTGCAATTAGTTTTGTAATTAGCCTATATTTAATACTCCTAATTAGCATCCAAACATCCGATGTGACAGGTGTTAAATTTTAACACTTGGTTGCCAAACAGGCCCTAAGC	342
ba472	DEL	Chr1	35983472	35983728	TGGGAGGTGCCAAATTACTGTTACAGCACTGTAGCACACTGTAGCGTTTCGTTTGTATTTGTGAATTATTGTCCAAATATTGACTAATTAGGCTCAAAAGATTCGTCTCGCAAAGTACAACAAAACTGTGCAATTACTTTTTAATTTCATCTACATTTAGTACTCCATGCATGTACCGCAAGTTTGATGTGATGGGGAATCTTCTTTTTGCATAGTGTCAAAGTTGGAAGTTGGGAGTAACTAAACATGGCCTAAA	289
ba473	DEL	Chr1	35984242	35984585	GTTTGGCAACACCCTGTTAAAGTTTAACACCTGTCACATCGGATGTTTAGATGCTAATTAGGAGTATTAAACATAGGCTAATTACAAAACTAATTGCACAGATGGAGTATAATTCGCGAGACGAATCTATTAAGCCTAATTAGTCCATGATTTGACAGTGTGGTGCTACAGTAACCATTTGCTAATGATGAATTAATTAGGCTTAATAGATTCGTCTCGCGAATTAGGACAGGGTTCTGCAATTAGTTTTATAATTAGCTCATGTTTAGTCCTCCTAATTAGCATCCGAACATCCGATGTGACACTGTTAAAGTTTAGCACCTCGTATCCAAACACCCCCTTA	350
ba475	DEL	Chr1	36254234	36254502	CCCAACTTTGACACTATGCAAAAAGAAGATTCCCCATCACATCAAACTTGCGGTACATGCATGGAGTACTAAATGTAGATGAAATTAAAAACTAATTGCACAGTTTTGTTGTACTTTGCGAGACGAATCTTTTGAGCCTAATTAGTCAATATTTGGACAATAATTCACAAATACAAACGAAACGCTACAGTGTGCTACAGTGCTGTAACAGTAATTTGGCACCTCCCAAATTCCCCAACTAAACAAGGCCTTGCTGGGCCTGACAGGC	282
ba476	DEL	Chr1	36356531	36356894	TGTAACTTACTAAGGGGGTGTTTGGATACGAGGTGTTAAACTTTAACAGTGTCACATCGGATGTTCGGATGATAATTAGGAGAACTAAACATGAGCTAATTATAAAACTAATTGCAGAACCCTGTGTTAATTCGCGAGACGAATCTATTAAGCCTAATTAATCCATCATTAGCAAATGGTTACTGTAGCACCACATTGTCAAAATCATGGACTAATTAGGCTTAATAGATTCGTCTCGTGAATTATACTCCATCTGTGCAATTAGTTTTGTAATTAGCCTATATTTAATACTCCTAATTAGCATCCAAACATCCGATGTGACGGGTGTTAAAGTTTAACAGCTGGTTGCCAAACAGGCCCTAC	344
ba477	DEL	Chr1	36383063	36383348	AACCAAAATCAGGCCTTGTTTAGTTAGGGAATTTGGGAGGTGCCAAATTACTGTTACAGCACTGTAGCACACTGTAGCGTTTCGTTTGTATTTGTGAATTATTGTCCAAATATTGACTAATTAGGCTCAAAAGATTCGTCTCGCAAAGTACAACAAAACTGTGCAATTAGTTTTTAATTTCATCTACATTTAGTACTCCATGCATGTACCGCAAGTTTGATGTGATGGGGAATCTTCTTTTTGCATAGTGTCAAAGTTGGGAGTTGGGAGTAACTAAACATGGCC	277
ba479	DEL	Chr1	36420056	36420349	TTGGATGCTAATTAGGAGTAGTAAACATAAGCTAATTACAAAACTAATTGCACAGATGGAGTATAATTCGCGAGACGAATCTATTAAGCCTAATTAGTCCATGATTTGACAATGTGGTGCTACAGTAACCATTTGCTAATGATGGATTAATTAGGCTTAATAGATTCGTCTCGCGAATTAGCACAAGGTTCTGCAATTAGTTTTATAATTAGCTCATGTTTAGTCCTCCTAATTAGCATCCGAACATCCGATGTGACACTGTTAAAGTTTAGCACCTCGTATCCAAACAGCCC	348
pD1131	DEL	Chr1	36652812	36653095	ACCTGGGCCTTGTTTAGTTGGCCAAATTGGGAGGTGCCAAATTACTGTGCTGGCACTGTAGCACACTGTAGCGTTTCGTTTGTATTTGTGAATTATTGTCCAAACATTGACTAATTAGGCTTAAAAGATTCGTCTCGCAAAGTACAACAAAACTGTGCAATTAGTTTTTAATTTCATCTACATTTAGTACTCCATGCATGTACCGCAAGTTTGATGTGATGGGGAATCTTCTTTTTGCATAGTGTCAAAGTTAGGAGTTGGGAGTGAAGTAAACAAGGCCCTG	278
ba487	DEL	Chr1	36972159	36972435	TTTAGGCCATGTTTAGTTACTCCCAACTCCCAACTTTAACACTATGCAAAAAGAAGATTCCCCATCACATCAAACTTGCGGTACATGCATGGAGTACTAAATGTAGATGAAATTAAAAACTAATTGCACAGTTTTGTTGTACTTTGCGAGACGAATCTTTTGAGCCTAATTAGTCAATATTTGGACAATAATTTACAAATACAAACGAAACGCTACAGTGTGCTACAGTACTGTAACAGTAATTTGGCACCTCCCAAATTCCCCAACTAAACACGG	282
ba488	DEL	Chr1	37162412	37162755	TTTGGATCATTGGAATTGAATTCCATCCTAATAATTATAATTTAGACACAAATTAATTAAGCTAATATAATTGTATGTGGAATATAGTTGTATATTATAGTTGGTGATATGGGAGAGATACTTGTATGCTGCACTTCTACCATAGAGAAGCGAGTCTAAGAGCGTGCTATAAGAATTGAATTCCATTCTAATAACCATAATCTATAGAATCAATTTCCATCTCCCACCCCATGAATTTAAGATAGACTTATATCTAAACTTTGGAAAGTTGTGGAATGCCACATTCCAACATAAATTAGCATACTCCATTAAATAGATTCCAATTCCTTGGACCCAAACGGGG	348
ba489	DEL	Chr1	37177111	37177460	TTTCTTTTGGGCCATGTTTAGTTACTCCCAACTCCCAACTTTGACACTATGCAAAAAGAAGATTCCCCATCACATCAAACTTGCGGTACATGCATGGAGTACTAAATGTAGATGAAATTAAAAACTAATTGCACAGTTTTGTTGTATTTTGCGAGACGAATCTTTTGAGCCTAATTAGTCAATATTTGGACAATAATTCACAAATACAAACGAAACGCTACAGTGTGCTACAGTGCTGTAACAGTAATTTGGCACCTCCCAAATTCCCCAACTAAACAAGGCCTTGATTCATTCATCCAGTATATGCATAAGCAGAGAGACGAGAGCTAGAAGAACAAGGAGAAGAAGA	282
ba490	DEL	Chr1	37181187	37181534	GGGCGTTTTCTTCCCGTGTCTTATTTTTAGCACGTGTCACATCGAATGTTTAGATACTAATTAGGAGTAGTAAACGTAGACTATGTACAAAACCAATTACATAGGTGGAATCTAAACAGCGAGACGAATCTATTAAGCCTAATTAATCTATCATTAGCAAATATTTACTGTAGCAACACATTGTCAAATCATGGACTAATTAGGCTTAATAGATTCGTCTCGCCGTTTAGATTCGTCTTATGTAATGGGTTTTGTAAATAGTCTACGTTTAATACTTCTAATTAGTATCTAAACATTTGATGTGACGGGTGCTAAAGTTTAGCAAGTGGAAGAAAACAGGCCCTAAC	345
ba493	DEL	Chr1	37339387	37340017	TGTAAGTATCTTTGCAGCCTACCTCTCATCTCACCCATATACTAGTGAGCTCTTCAATAACAATACAAGATTTACTTGTCTCTCTCACAAAGTTTCTCGATTTTTCTATCTAAGTGAGATGTAAGTTTACAACCTGCTTCTTCTCTCTCCTCACCTCTCTCCTCCACCTTAGCATTCAGCCTACTCCCAGGCTGCTTGCTCTAAGAGCAAGTTTAATAACGCAGCTAGCAAGCGGGCTGCAAGGTTTCTCTCAGCCTTTTTCTAACCCACTCGTACAATGGTTAGCTCTTCATCATTAATACATGGCCCACAAGTCATTCTCACAAAGTTTCTTGGTTCCTGTGCCCAAGTCGGCTGTAAGCTTACAGCTCGCTTCTCCTCTCTCACCTCTTCTCTCTC…	254
ba497	DEL	Chr1	37414545	37414829	TTGGCCAATTTGGGAGGTGCCAAATTACTGTTACAGCACTGTAGCACACTGTAGCGTTTCGTTTGTATTTGTGAATTATTGTCCAAATATTAACTAATTAGGCTCAAAAGATTCGTCTCGTAAAGTACAACAAAACTGTACAATTACTTTTTAATTTCATCTACATTTAGTACTCCATACATGTACCGCAAGTTTGATGTGATGGGGAATCTTCTTTTTGCATAGTGTCAAAGTTGGAAGTTGGGAGTAACTAAACATGGCCTGAGCATGGAAGTTTCAGATCC	286
ba503	DEL	Chr1	37498169	37498510	GGTGTTTGGGAACACCTTGTTAAAGTTTAACAACTGTCACATCGGATGTTTGGATGCTAATTAGGAGTATTAAACATAGACTAATTACAAAACTAATTACACAGATGGAGTATAATTCGCGAGACGAATCTATTAAACCTAATTAGTCTATGATTTGACAATGTGGTGCTACAGTAACCATTTGCTAATGATGGATTAATTAGGCTTAATAGATTCGTCTAGCGAATTAGCACAGGGTTCTGCAATTAGTTTTATAATTAGCTCATGTTTACTCCTCCTAATTAGCATCCGAACATCCGATGTGACACTGTTAAAGTTTAGCACCTCGTATCCAAACAGCC	356
ba506	DEL	Chr1	37556164	37556456	GCAAAGCGTGCAGTCCAAGCCCTTGTTTACTTCACCCCCAACTCCCAACTTTGGCATTATGCAAAAAGAAGATTTCCCATCATATCAAACTTGCGGTACATGCATGGAGTGCTAAATGTAGACGAAATCAAAAACTAATTGCACAGTTTTGTTGTACTTTGCGAGACGAATCTTTTGAGCCTAATTAGTCAATATTTAGACAATAATTTACAAGTACAAACGAAACGCTACAGTGTCGCATTAATGGTAAAATGCCAATTTTGTCACTCCCAAATTGGGAAGTAAACAAGGC	276
ba508	DEL	Chr1	37580163	37580514	TCTGTCTGTTTTCAGGGGCTGTTTGGATACTAGGTTCTAAACTTTAGCAGTGTCACATCGGATGTTCGGATGCTAATTAGGAGGACTAAATATGAGCTAATTATAAAACTAATTGTAGAACCATGTGCTAATTCGCGAGACGAATCTATTAAGCCTAATTAATCTATCGTTAGCAAATGGTTACTGTAGCACCAAATTATCAAATCATGGACTAATTAGGCTTAATAGATTCGTCTCACGAATTAGACTCCATCTGTGTAATTAATTTTGTAATTAGTCTATGTTTAATACTCCTAATTAGCATCCAAACATATGATGTGACAGGTGCTAAATTTTAGCGGGGTGTTTCCC	343
ba512	DEL	Chr1	37720503	37720765	GTTTGGCGAATTTGGGGGTGCTAAATTACTGTTACAGCACTGTAGCACACTGTAGCGTTTCGTTTGTATTTGTGAATTATTGTCCAAATATTGACTAATTAGGCTCAAAAGATTCGTCTCGCAAAGTACAACAAAACTGTGCAATTAGTTTTTAATTTCATCTACATTTAGTACTCCATGCATGTACCGCAAGTTTGATGTGATGGGGAATCTTCTTTTTGCATAGTGTCAAAGTTGGGAGTTGGGAGTAACTAAACATGGC	276
pD1175	DEL	Chr1	37815883	37816236	TTTAGGGGGTGTTTGGATACGAGGTGTTAAACTTTAACAGTGTCACATCGGATGTTCGGATGCTAATTAGGAGAACTAAACATGAGGTAATTATAAAACTAATTGCAGAACCCTGTGCTAATTCGCGAGACGAATCTATTAAGCCTAATTAATCCATCATTAGCAATTGGTTACTGTAGCACCATATTGTCAAATCATGGACTAATTAGGCTTAATAGATTCGTCTCGTGAATTACACTCCATCTGTGCAATTAGTTTTGTAATTAACCTATGTTTAATACTCCTAATTAGCATCCAAACATCCGATGTGACAGGTGTTAAACTTTAACACTTGATTGCCAAACACGCCCTTA	349
ba513	DEL	Chr1	37816798	37817144	GGTGTTTGGCCAGGAGGGGCTAAATTTTAGCCCCTGTCACATCGGATGTTTGGACACTAATTAGGAGTATTAAACATAGTCTAATTACAAAACTAATTGCACAACCCCTAGGCTAAATCGCGAGACGAATCTATTAAGCCTAATTAGTCCATGATTTGATAATGTGGGGCTACAATAACCATTCCCTCCTGAAGCATTAATTATGATTACTACATACTTTTCGCGATTTAGGCTACGGGTTCTGCAATTAGTTTTATAATTAGCTCATATTTAATCCTCCTAATTAGCATTCGAACGTGTGATGTGACAGGGCTAAAGTTTAGCCCGTGGCATCCAAACGCCCCCA	376
ba516	DEL	Chr1	37943801	37944006	CCAACTCCCAACTTTGACACTATGCAAAAAGAAGATTCCCCATCACATCAAACTTGCGGTACATGCATAGAGTACTAAATGTAGATGAAATTAAAAACTAATTGCACAGTTTTGTTGTACTTTGCGAGACGAATCTTTTGAGCCTAATTAGTCAATATTTGGACAATAATTCACAAATACAAACGAAACGCTACAGTGTGCTACA	281
ba517	DEL	Chr1	37957907	37958235	AAGTTTAACACCCGTCACATCGAATGTTTGGATGCTAATTAGGAGTATTAAACATAGACTAATTACAAAACTAATTGCACAGATGGAGTGTAATTCGTGAGACGAATCTATTAAGCCTAATTAGTCCATGATTTGACAATGTGGTGCTACAGTAACCATTTGCTAATGATGGATTAATTAGGCTTAATAGATTCGTCACGCGAATTAGCACAGGGTTCTGCAATTAGTTTTATAATTAGCTCATGTTTAGTTCTCCTAATTAGCATCCGAACATCCGATGTGACACTGTTAAAGTTTAGCACCTCGTATCCAAACACCCCCTTACCCG	353
ba518	DEL	Chr1	37994422	37994740	AGTTTAACACCCGTCACATCGAATGTTTGGATGCTAATTAGGAGTATTAAACATAGACTAATTACAAAACTAATTGCACAGATGGAGTGTAATTCGTGAGACGAATCTATTAAGCCTAATTAGTCCATGATTTGACAATGTGGTGCTACAGTAACCATTTGCTAATGATGGATTAATTAGGCTTAATAGATTCGTCACGCGAATTAGCACAGGGTTCTGCAATTAGTTTTATAATTAGCTCATGTTTAGTTCTCCTAATTAGCATCCGAACATCCGATGTGACACTGTTAAAGTTTAGCACCTCGTATCCAAACACCC	347
ba519	DEL	Chr1	38104494	38104807	CCCAACTCCCAACTTTGACACTATGCAAAAAGAAGATTCCCCATCACATCAAACTTGCGGTACATGCATGGAATACTAAATGTAGATGAAATTAAAAACTAATTGCACAGTTTTGTTGTACTTTGCGAGACGAATCTTTTGAGCCTAATTAGTCAATATTTGGACAATAATTCACAAATACAAACGAAACGCTACAGTGTGCTACAGTGCTGTAACAGTAATTTGGCACCTCCCAAATTCCCCAACTAAACACGGCCGTGGGCGCGTGCCGTGCGTCGAGTGCCCGCCCGCGCCAGGTGGGTGGAATCATTGC	277
ba522	DEL	Chr1	38293090	38293405	ATTAGGGCCTTGTTTAGTTGCTAAAATTTGAAGTGTCAAAATTAATGTACCAGCACTGTAGCACACTGTAGCGTTTCGTTTGTATTTGTGAATTATTGTCCAAACATTGACTAATTAGGTTCAAAAATTTGTCTCGCAAAGTACAACAAAATTGTACAATTAGTTTTTAATTTCGTCTACATTTAGTACTCCATGCATGTACCGCAAGTTTGATGTGATAGGAAATCTTCTTTTTTCATAGTGATAAAGTTGGGAGTTGGAGGTGAACTGAACAAGAGCTTAGTCTTCTTGGTTAGGCATGGTGTGAGCTAAAGA	320
ba528	DEL	Chr1	38471314	38471681	AAAAGCAACCAAAGCTTCGTTCGGGGGTAGCCGATGCGGGCAAGGAAGCAACTCCGCCGCGACTAGGGCCTTGTTTAGTTGGGGAATTTGGGAGGTGCCAAATTACTGTTACAGCACTGTAGCACACTGTAGCGTTTCGTTTGTATTTGTGAATTATTGTCCAAATATTGACTAATTAGGCTCAAAAGATTCGTCTCGCAAAGTACAACAAAACTGTGCAATTAGTTTTTAATTTCATCTACATTTAGTACTCCATGCATGTACCGCAAGTTTGATGTGATGGGGAATCTTCTTTTTGCATAGTGTCAAAGTTGGAAGTTGGGAGTAACTAAACATGGCCTAGTGTAGCAGCGAACAACTACGCCAA	274
ba530	DEL	Chr1	38552316	38552673	AAAGTTTAACACCCGTCACATCGAATGTTTGGATGCTAATTAGGAGTATTAAACATAGACTAATTACAAAACTAATTGCACAGATGGAGTGTAATTCGTGAGACGAATCTATTAAGCCTAATTAGTCCATGATTTGACAACGTGGTGCTACAGTAACCATTTGTTAATGATGGATTAATTAGGCTTAATAGATTCGTCACGTGAATTAGCACAGGATTATGCAATTAGTTTTATAATTAGCTCATGTTTAGTTCTCCTAATTAGCATCCGAACATCCGATGTGACACTGTTAAAGTTTAGCACCTCGTATCCAAACACCCCCTTAATAGATTCATCTCGTGAATTAGCCTTTATTTG	355
ba531	DEL	Chr1	38771317	38771582	TTAGTTGGCCAATTTGGGAGGTGCCAAATTACTGTTACAGCACTGTAGCACACTGTAGCGTTTCGTTTGTATTTGTGAATTATTGTCCAAATATTGACTAATTAGGCTCAAAAGATTCGTCTCGTAAAGTACAACAAAACTGTGCAATTACTTTTTAATTTCATCTACATTTAGTACTCCATGCATGTACCGCAAGTTTGATGTGATGGGGAATCTTCTTTTTGCATAGTGTCAAAGTTGGAAGTTGGGAGTAACTAAACATGGC	282
ba532	DEL	Chr1	38796088	38796413	CTAAACTTTAACAGTGTCACATCGGATGTTCGGATGCTAATTAGGAGGATTAAACATGAGCTAATTATAAAACTAATTGCAGAACCCTGTGCTAATTCGCGAGACGAATCTATTAAGCCTAATTAATCCATCATTAGCAAATGGTTACTGTAGCACCACATTGTCAAATCATGGACTAATTAGGCTTAATAGATTCGTCTCGCGAATTATACTCCATCTGTGCAATTAGTTTTGTAATTAGCTTATGTTTAGTACTCCTAATTAACATCCAAACATCCGATGTGACAGGTATTAAACTTTAACAGGTGTTTCCCAAACACCCCCT	351
ba534	DEL	Chr1	38811660	38812011	GGGTGTTTGGGAACACCGTGTTAAAGTTTAACACCTGTCACATCGGATGTTTGGATGCTACTTAGGAGTATTAAACATAGGCTAATTATAAAACTAATTGCACAGATGGAGTATAATTTGCGAGATGAATCTATTAAGTCTAATTAGTCCATGATTTGACAATGTGGTGCTACAGTAACCATTTGCTAATGATGGATTAATTAGGCTTAATAGATTCATCTCACCAATTAGCATAGGGTTCTGCAATTAGTTTTATAATTAGCTCATGTTTAGACCATTTAATTAGCATCCGAACATCCGATGTGACACTGTTAAAGTTTAGCACCTCGTATCCAAACACCCCCTTAATCT	356
ba536	DEL	Chr1	39001407	39001735	AAGGCGATTAAGGGGCTGTTTGGAAGGAGGAGGCTAAACTTTAGCCCTGTCACATCGGATGTTCGGATACTAATTAAGAGGACTAAACATAAGCTAATTACAAAACTAATTGCAGAACCCCTAGGCTAAATCGCGAGACGAATCTATTGAGCCTAATTAATCCATCATTAGTGAATGGTTACTGTAGCACCACATTGTCAAATCATGCACTAATTAGGCTTAATAGATTCGTCTCGCGATTTAGCCTAGGGGTTGTGTAATTAGTTTTGTAATTAATCTAAGTTTAATACTCCTAATTAGTGTCCAAACATTCGATGTGACGGGGGCT	348
ba538	DEL	Chr1	39071908	39072333	CATGCGCATGTGGTAACATGGACGCATGATGGGATTAAAGAGGGCAGAAGGAGGTGGTAAACAGCGGAGCCTATGCAACTGAGGGGCTGTTTGGATACGAGGTGCTAAACTTTAACAGTGTCACATCGGATGTTTGGATGCTAATTAGGAGGACTAAACATGAGCTAATTATAAAACTAATTGCAGAACCTTGTGCTAATTCGCGAGACGAATCTATTAAGCCTAATTAATCCATCATTAGCAAATGGTTACTGTAGCACCACATTGTCAAATCATGGACTAATTAGGCTTAATAGATTCGTCTCGCGAATTATACTCCATCTGTGCAATTAGTTTTGTAATTAGCTTATGTTTAGTACTCCTAATTAGCATCCAAACATCCGATGTGACAGGTGTTAA…	354
ba539	DEL	Chr1	39113249	39113613	TTGGCAACCACCTATTAAAGTTTAACACCCGTCACATCGGATGTTTGGATGCTAATTAGGAGTATTAAATATAGGCTAATTATAAAACTAATTGCACAGATGGAGTATAATTCGCGAGACGAATCTATTAAGCCTAATTAGTCCATGATTTGACAATGTGGTGCTACAGTAACCATTTGCTAATGATGGATTAATTAGGCTTAATAGATTTATCTCGCGAATTAACACAGGGTTCTGCAATTAGTTTTATAATTAGCTCATGTTTAGTTCTCCTAATTAGCATCCGAACATCCGATGTGACACTGTTAAAATTTAACACCTCGTATCCAAACACCCCCTTTATTTTCTGCAATTCACAATCTAC	364
ba540	DEL	Chr1	39267132	39267489	GCGACGCCAGGAGGATGCTTCACTTCCCGGTTTGGCAACAGCTGCCCGGAGACCGGGCGATGCTAGTCGTAGAGCAGTTTGGGGCCATGTTTAGTTACTCCCAACTCCCAACTTTGACACTATGCAAAAAGAAGATTCCCCATCACATCAAACTTGCGGTACATGCATGGAGTACTAAATGTAGATGAAATTAAAAACTAATTGCACAGTTTTGTTGTACTTTGCGAGACGAATCTTTTGAGCCTAATTAGTCAATATTTGGACAATAATTCACAAATACAAACGAAACGCTACAGTGTGCTACAGTGCTGTAACAGTAATTTGGCACCTCCCAAATTCCCCAACTAAACAAGGCCT	277
ba541	DEL	Chr1	39318449	39318722	TTAGGCCGTGTTTAGTTTGGCGAATTTGGGGTGCTAAATTACTGTTACAGCACTGTAGCACACTGTAGCGTTTCGTTTGTATTTGTGAATTATTGTCCAAATATTGACTAATTAGGCTCAAAAGATTCGTCTCGCAAAGTACAACAAAACTGTGCAATTAGTTTTTAATTTCATCTATTTAGTACTCCATGCATGTACCGCAAGTTTGATGTGATGGGGAATCTTCTTTTTGCATAGTGTCAAAGTTGGGAGTTGGGAGTAACTAAACATGGC	278
ba554	DEL	Chr1	40915530	40915833	TCCCATTCTCATCCGACCCAAACCCAGGCCGTGTTTAGTTGGGGAATTTGGGAGGTGCCAAATTACTGTTACAGCACTGTAGCACACTGTAGCGTTTCGTTTGTATTTGTGAATTATTGTCCAAATATTGACTAATTAGGCTTAAAAGATTCGTCTCGCAAAGTACAACAAAACTGTGCAATTAGTTTTTAATTTCATCTACATTTAGTACTCCATGCATGTACCGCAAGTTTGATGTGATAGGGAATCTTCTTTTTGCATAGTGTCAAAGTTGGGAGTTGGGAGTAACTAAACATGGCCCCA	278
ba557	DEL	Chr1	40985700	40986064	CGGGTGTGTCGCACGCCTAAGGGCCTGTTTGGCTCACCGGTGTTAAAGTTTAACACCCATCACATCGGATGTTTGAATGCTAATTAGGAGTATTAAACATAGGTTAATTACAAAACTAATTGCACAGATGGAGTGTAATTCGCGAGACGAATCTATTAAGCCTAATTAGTACATGATTTGACAATGTGGTGCTACAGTAACCATTTGCTAATGATGGATTAATTAGGCTTAATAGATTCGTCTCGCGAATTAGCATAGGGTTCTGCAATTAGTTTTATAATTAGCTCATATTTAGTTCTCCTAATTAGCATCCGAACATTTGATGTGACAGTATTAAAGTTTAACACCTCGTATCCAAACACCC	353
ba558	DEL	Chr1	41064285	41064539	CCCAACTTCCAACTTTGACACTATGCAAAAAGAAGATTCCCCATCACATCAAACTTGCGGTACATGCATGGAGTACTAAATATAGATGAAATTAAAAAGTAATTGCACAGTTTTGTTGTACTTTGCGAGACGAATCTTTTGAGCCTAATTAGTCAATATTTGGACAATAATTCACAAATACAAACGAAACGCTACAGTGTGCTACAGTGCTGTAACAGTAATTTGGCACCTCCCAAATTCGCCAACTAAACAAG	274
ba562	DEL	Chr1	41093623	41093993	GGTGTTAAACTTTAACAGTGTCACATCGGATGTTCGGATGCTAATTAGGAGAACTAAACATGAGCTAATTATAAAACTAATTGCAGAACCCTATGTTAATTCACGAGACGAATCTATTAAGCCTAATTAATCCATCATTAGCAAATAGTTACTGTAGCACCACATTGTCAAATCATGGACTAATTAGGCTTAATAGATTCGTCTCGCGAATTATACTCCATCTGTGCAATTAGTTTTGTAATTAGCCTATGTTTAATACTTCTAATTAGCATCCAAACATCCGATGTGACGGGTGTTAAACTTTAACAGCCGGTTGCCAAACAGGCCCTTAAGTGTTTTGCATGGCTGTCACATTGGATCATTTAATTGA	356
ba564	DEL	Chr1	41197162	41197474	CTTCCAACTTTGGCACTATGCAAAAAGAAGATTCCCCATCATATCAAACTTGCGGTGCATGCATGGAGTACTAAATGTAGACGAAATTAAAAACTAATTGCACAGTTTTGTTGTACTTTGCGAGACGAATCTTTTGAGCCTAATTAGTCAATGTTTGAACAATAATTCACAAATACAAACGAAACGCTACAGTGTGCTACAGTGCTGTAACAGTAATTTGGCACCTCCCAACTTCAACAACTAAACAAGGCCTCACACTACTACCGATTAGATTAAATTAAATTGGCTATCAAATCAAATCGCGGATAGATC	279
ba565	DEL	Chr1	41263894	41264199	GGAATTTGGGAGGTGCCAAATTACTGTTACAGCACTGTAGCACACTGTAGCGTTTCGTTTGTATTTGTGAATTATTGTCCAAATATTGACTAATTAGGCTCAAAAGATTCGTCTCGCAAAGTACAACAAAACTGTGCAATTAGTTTTTAATTTCATCTACATTTAGTACTCCATGCATGTACCGCAAGTTTGATGTGATGGGGAATCTTCTTTTTGCATAGTGTCAAAGTTGGGAGTTGGAAGTAACTAAACATGGCCCGAGTGCCGGAGCTAGGCAACTGGCGCTAATCCCCATCCAGGCACAG	283
ba566	DEL	Chr1	41264403	41264679	AAGGCCGTGTTTAGTTGGGGAATTTGGGAGGTGCCAAATTACTGTTACAGCACTGTAGCACACTGTAGCGTTTCGTTTGTATTTGTGAATTATTGTCCAAATATTGACTAATTAGGCTCAAAAGATTCGTCTCGCAAAGTACAACAAAACTGTGCAATTAGTTTTTAATTTCATCTACATTTAGTACTCCATGCATGTACCGCAAGTTTGATGTGATGGGGAATCTTCTTTTTGCATAGTGTCAAAGTTGGGAGTTGGGAGTAACTAAACATGGCC	284
ba567	DEL	Chr1	41458167	41458491	TTAAAGTTTAACACCTGTCACATCGGATGTTTGGATGCTAATTAGGAGTAGTAAACATAAGCTAATTACAAAACTAATTGCACAGATGGAGTATAATTCGCGAGACGAATCTATTAAGCCTAATTAGTCCATGATTTGATAATGTGGTGCTACAGTAACCATTTGCTAATGATGGATTAATTAGGCTTAATAGATTCGTCTCGCGAATTAGCACAAGGTTCTGCAATTAGTTTTATAATTAGCTCATGTTTAGTCCTTCTAATTAGCATCCGAACATCCGATGTGACACTGTTAAAGTTTAGCACCTCGTATCCAAACAGCCCC	348
ba571	DEL	Chr1	41776498	41776858	AGATTAGGGGGTGTTTGGGAACACCCTGTTAAAGTTTAACACCTATCACATCGGATGTTTGGATGCTAATTAGGAGTATTAAACATAGGTTAATTACAAAACTAATTGCACAGATGGAGTATAATTCGCGAGACGAATCTATTAAGCCTAATTAGTCCATGATTTGACAATGTGGTGCTACAGTAACCATTTGCTAATGATGGATTAATTAGGCTTAATAGATTCGTCTCGCAAATTAGCACAGGGTTCTGCAATTAGTTTTATAATTAGCTCATGTTTAGTGCACCTAATTAGTATCCGAACATCCGATGTGACACTGTTAAAGTTTAACACCTCGTATCCAAACACCCCCTTCTCCTA	363
ba572	DEL	Chr1	41779948	41780320	ATCATTCCCTCCCTCCACAAAGGATTAAGGGGGTGTTTGGGAGACAGGGGCTAAACTTTAGTCCTATCACATCGGATGTTCGGATGCTAATTAGGAGGACTAAATATGAGCTAATTACAAAACTAATAGCAGAACCCCTAGGCTAAATCACGAGACGAATTTATTGAGCCTAATTAATCCCTCATTAGCGAATGGTTACTGTAGCACCACATTGTCAAATTATGGACTAAATTAGCTTAATAGATTCGTCTCGCGATTTAGCCTAGGGGTTGTGTAATTAGTTTTGTAATTAGTCTAGGTTTAATATTCATAATTAGTGTCCAAACATTCGATGTGACGGGGGCTAAAATTTAGCCCCCTCCTCCCAAACAC	364
ba582	DEL	Chr2	44056	44397	TGGATCATTGGAATTGAATTCCATCCTAATAATTATAATTTAGACACAAATTAATTAAGCTAATATAATTGTATGTGGAATATAGTTGTATATTATAGTTGGTGATATGGGAGAGATACTTGTATGCTGCACTTCTACCATAGAGAAGCGAGTCTAAGAGCGTGCTATAAGAATTGAATTCCATTCTAATAACCATAATCTATAGAATCAATTTCCATCTCCCACCCCATGAATTTAAGATAGACTTATATCTAAACTTTGGAAAGTTGTGGAATGCCACATTCCAACATAAATTAGCATACTCCATTAAATAGATTCCAATTCCTTGGACCCAAACGGGG	349
ba586	DEL	Chr2	69720	70001	AATATAGGGCCATGTTTAGTTACTCCCAACTTCCAACTTTGACACTATGCAAAAAGAAGATTCCCCATCACATCAAACTTGCGGTACATGTATGGAGTACTAAATGTAGATGAAATTAAAAAGTAATTGTACAGTTTTGTTGTACTTTACGAGACGAATCTTTTGAGCCTAATTAGTTAATATTTGGACAATAATTCACAAATACAAACGAAACGCTACAGTGTGCTACAGTGCTGTAACAGTAATTTGGCACCTCCCAAATTGGCCAACTAAACAAGGCC	279
ba587	DEL	Chr2	105115	105490	GCAGATGATTGCTGCAGTAATTTCGCCCAGCATTGCAGCAGCAGATGCGAAGAGGCCTGCATGTTACTGTCTGACAGGTGAGGGATCTGCTTCTACTTAGGCCATGTTTAGTTACTCCCAACTCCCAACTTTGACACTATGCAAAAAGAAGATTCCCCATCACATCAAACTTGCGGTACATGCATGGAGTACTACATGTAGATGAAATTAAAAACTAATTGCACAGTTTTGTTGTACTTTGCGAGACGAATCTTTTGAGCCTAATTAGTCAATATTTGGACAATAATTCACAAATACAAACGAAACGCTACAGTGTGCTACAGTGCTGTAACAGTAATTTGGCACCTCCCAAATTCCCCAACTAAACACGGCCTT	273
ba591	DEL	Chr2	218944	219282	TGCTCAAGGGACCTATTCTTAGGCCATGTTTAGTTACTCCCAACTCCCAACTTTGACACTATGCAAAAAGAAGATTCCCCATCACATCAAACTTGCGGTACATGCATGGAGTACTAAATGTAGATGAAATTAAAAACTAATTGCACAGTTTTGTTGTACTTTGCGAGACGAATCTTTTGAGCCTAATTAGTCAATATTTGGACAATAATTCACAAATACAAACGAAACGCTACAGTGTGCTACAGTGCTGTAACAGTAATTTGGCACCTCCCAAATTCCCCAACTAAACACGGCCTTAGCTTGTTGCTTCGCATTGATGTTACTTTGTATGATGTTTT	281
ba592	DEL	Chr2	276850	277203	CTGTTTTCTTCCACTTGCTAAACTTTAGCACCCGTCACATCAAATGTTTAGATACTAATTAGGAGTATTAAACGTAGACTATTTACAAAACCCATTACATAAGACGAATCTAAACGGCGAGACGAATCTATTAAGCCTAATTAGTCCATGATTTGACAATGTGTTGCTACAGTAAATATTTTGCTAATGATGGATTAATTAGGCTTAATTAGGCTTAATAGATTCGTCTCGCCGTTTAGATTCCACTTATGTAATTGGTTTTGTAAATAGTCTACGTTTACTACTCCTAATTAGTATCTAAACATTCGATGTGACACGTGCTAAAAATAAGACACGGGAAGAAAACGCCCCCT	360
ba596	DEL	Chr2	666431	666847	TCATCCTCAGAGTCTGAATCTAATAACCAAGCTCGAGACTCGAAGAACACTTCATCCAAAATTAAGGGGGTGTTTGGGAAACCCCTGTTAAAGTTTAACACCTGTCACATCGGATGTTTGGATGCTAATTAGGAGTACTAAACATAAGCTAATTACAAAACTAATTGCACAGATGGAGTATAATTCGCGAGACGAATCTATTAAGCCTAATTAGTCCATGATTTGACAATGTGGTGCTACAGTAACTATTTGCTAATGATGGATTAATTAGGCTTAATAGATGCGTCTCGCGAATTAGCACAAGGTTCTGCAATTAGTTTTATAATTAGCTCATATTTAGTCCTCCTAATTAGCATCCGAACATCCGATGTGACACTGTTAAAGTTTAGCACCTCATAT…	346
ba609	DEL	Chr2	1244051	1244467	CTTCTCTCTGACCTCGTGGACGTGCTCCCATCTCTCATCGATCGGAGAAGATGCATTCTGCTCTTTGAGTTTTATACATGTGCATCATCGGAAAGGGGATCTGCGCATTTTTGCTCACATAAGCCTCGTTTGCCAAGTCAAGATAGGCCCTCGAAACAACTTTCTGTAAAATTGAATCGGCCCAGACCAAGCGCGAGGTAAACACCGCTCGCCTTGGGAAATTGCAGGCGGCAGGAGTGCCAGCCGCCTGGCGGAGCGACAAGGCCGGGCTGCGGCGGCGTGGAGGGGGAGGACGATGGCCGTCCGGCGTCGGCCATGCGCATGCGCAGTAAGGTACGCTCCCCACATCTCACACGCCGCAGTCAAGGTATTCACTTATTGGCGAAGTCGTGGCTTGAG…	269
ba620	DEL	Chr2	1591084	1591416	GAACACCCTGTTAAAGTTTAACACCTGTCACATCAGATGTTTGGATACTAATTAGGAGTATTAAACATAGGCTAATTATAAAACTAATTGCACGGATGGAGTATAATTCGCGAGACGAATCTATTAAGCCTAATTAGTCCATGATTTGACAATGTGGTGCTACAGTAACCATTTGCTAATGATGGATTAATTAGGCTTAATAGATTCATCTCGCGAATTAGCACAGGATTCTGCAATTAGTATTATAATTAGCTCATATCTAGTCCTCCTAATTAGCATCCGAACATCCGATGTGACACTGTTAAAGTTTAGCACCTCATATCCAAACACCC	362
ba623	DEL	Chr2	1913670	1913896	CCAATGTACAAAATAGCAGGCTATGTGATTTAGCGTAGAGTTGTGCTCAACCGCTATAGCTCGCTATAGCCCGCTAATTAGTACAACACTGTTGTGGTGGCAGCTAGCATCAACCGCTATAGCGTCACTATAGCCCGCTATTTCGTACATTGATCTTCACGTGTCTAAACAATGTGATTCACATAAGCTGAGCTAGAACTCTAATATATCCAGTTCCAACTTCCAA	203
ba624	DEL	Chr2	1953527	1953850	GTTAAATTTTAACAGTGTCACATCGGATGTTCGGATGCTAATTAGGAGAACTAAACATGAGCTAATTATAAAACTAATTGCAGAACCCTGTGTTAATTCGCGAGATAAATCTATTAAGCCTAATTAATCCATCATTAGCAAATGGTTACTGTAGCACCACATTGTCAAATCATGGACTAATTAGGCTTAATAGATTCGTCTCGCGAATTATACTCCATCTGTGCAATTAGTTTTATAATTAGACTATATTTAATACTCCTAATTAGCATCCAAACATCCGATGTGACGGGTGTTAAACTTTAATAGGTGGTTGCCAAACAGGC	345
ba625	DEL	Chr2	1975557	1976025	GCAATTTGCCGAGTTGCTTGCTACGAAATAACTCGAACGGGTAGCTTTCCGCAGAGTTCAGTTCCAATTCTGAGCACGCAATTTTGTAGCAACCGAGCATTAACACGTATCACAGGACGGTTAAGGGGGTGTTTGGGAAACACCCGTTAAAGTTTAACACCTATCACATCGAATGTTTGGATGCTAATTAGGAGTACTAAACATAAGCTAATTACAAAACTAATTGCACAGATGGAGTATAATTCGCGAGACGAATCTATTAAGCCTAATTAGTCCATGATTTGACAATGTGGTGCTACAGTAACCATTTGCTAATGATGGATTAATTAGGCTCAATAGATTCGTCTCGCGAATTAGCACAAGGTTCTGCAATTAGTTTTATAATTAGCTCATGTTTAG…	357
ba627	DEL	Chr2	2020492	2020829	GAAACACCTGTTAAAGTTTAACACCTGTCACATCGGATGTTTGGATGCTAATTAGGAGTACTAAACATAAGCTAATTACAAAACTAATTGCACAGATGGAGTATAATTCGCGAGACGAATCTATTAAGCCTAATTAGTCCATGATTTGACAATGTGGTGCTACAGTAACCATTTGCTAATGATGGATTAATTAGGCTTAATAGATTCGTCTCGCGAATTAGCACAAGGTTCTGCAATTAGTTTTATAATTAGCTCATGTTTAGTCCTCCTAATTAGCATCCAAACATCCGATGTGACACTGTTAAAGTTTAGCACCTCGTATCCAAACAGCCCCGTA	343
ba628	DEL	Chr2	2026268	2026589	TTAAACTTTAATACTGTCACATCAAATGTTCGGATGCTAATTAGGAGAACTAAATATGAGCTAATTATAAAACTAATTGCAGAACCCTATGCTAATTCGCGAGACGAATCTATTAAGCCTAATTAATCCATCATTAGCAAATGGTTACTGTAGCACCACATTGTCAAATCATGTACTAATTAGGCTTAATAGATTCGTCTCGCGAATTACACTCCATCTGTGCAATTAGTTTTGTAATTAACCTATGTTTAATACTCCTAATTAGCATTCAAACATCCGATGTGATGGGTGTTAAACTTTAACACCGGTGAGCCAAACAGG	349
ba629	DEL	Chr2	2029294	2029639	TTTTCTTCCACTTGCTAAACTTTAGCACCCGTCACATCGAATGTTAAGATACTAATTAGAAGTATTAAACGTAGACTATTTACAAAACCCATTACATAAGACGAATCTAAACGGCGAGACGAATCTATTAAGCCTAATTAGTCCATGATTTGACAATGTGTTGCTACAGTAAATATTTGCTAATGATGGATTAATTAGGCTTAATTAGACTTAATAGATTCGTCTCGCCGTTTAGATTCCACTTATGTAATTGGTTTTGTAAATAGTCTACGTTTACTACTCCTAATTAGTATCTAAACATTCGATGTGACACGTGCTAAAAATAAGACACGGGAAGAGGAGCTA	351
ba630	DEL	Chr2	2034836	2035160	GCTAAACTTTAACAGTGTCACATCGGATGTTTGGATGCTAATTAGGAGGACTAAACATGAGCTAATTATAAAACTAATTGCAGAACCTTGTGCTAATTCGCGAGACGAATCTATTAAGCCTAATTAATCCATCATTAGCAAATGGTTACTGTAGCACCACATTGTCAAATCATGGACTAATTAGGCTTAATAGATTCGTCTCGCGAATTATACTCCATCTGTGCAATTAGTTTTGTAATTAGCTTATGTTTAGTACTCCTAATTAGCATCCAAACATCCGATGTGACAGGTGTTAAACTTTAACAGGTGTTTCCCAAACACCCC	354
ba632	DEL	Chr2	2080598	2080991	CAGCTAGGACAGTAGCATTTCACTGAGGCCACGTTTGGATACACAATGCTAAATTTTAGCACAGTGCTAAACTTTAGCACTCCTACTTGGGGTTGTTTGGATACAGTGCTAAAGTTTAGCACATTAGGTGAGAAATGACTACACCACCCTCATTTATGATTAGCTTGGGGAAAAGTGGAGAGGAGAGAGAGGGGGCAGCAGAGGAAAAAATGGGCTTGGGACCACTTTTAGCACCTATTAGCACCTTTTAGCACCCCTTAAGGTGTGCTAAAGAAAATAAGGATGCTAAACTTTAGCACACCCCTTTTAGCACCCCTGTTTGGAAGCCCCAGTGCTAAAAGGTGCTAAAAAGTGGGGTGCTAAAGTTTAGCATCCCCTCTTCAAACAGGACCT	370
ba640	DEL	Chr2	2842251	2842612	AATTCCATCCTAATAATCATAATTTAGACACAAATTAATTAAGCTAATATAATTGTATGTGGAATATAGTTGTATATTATAGTTGGTGATATGGGAGAGATACTTGTATGCTGCAGTTCTACTGTAGAGAAGCGAGTCTAAGAGCGTGCTATAAGAATTGAATTCCATCTAATAACCATAATCTATAGAATCAATTTCCATCTCCCACCCCATGAATTTAAGATAGGCTTATATCTAAACTTTGGAAAGTTGTGGAATGCCACATTCCAACATAAATTAGCCTACTCCATTAAATAGATTCCAATTCCTTGGACCCAAACGGGGCCTAATGGAAGGTGTGGATTCTCTATATTAGGATGAG	350
ba656	DEL	Chr2	3256255	3256505	CTTGCCAAATTGGGAGGTGCCAAATTACTGTAGCAACACTGTAGCGTTTCGTTTGTATTTGTGAATTATTGTGCAAACATTGACTAATTAGGCTCAAAAGATTCATCTCGCAAAGTACAACAAAACTGTGCAATTAGTTTTTAATTTCATCTACATTTAGTACTCCATACATGTACCGCAAGTTTGATGTGATGGGGAATCTTCTTTTTGCATAGTGTTAAAGTTGGGAGTTGGGGGTAAAGTGAACAAG	270
ba665	DEL	Chr2	3340845	3341302	TTTAGCACGTGTCACATCGAATGTTTAGATATTAATTAGGAGTATTAAACGTAGACTATTTACAAAACCCATTACATAATACAAAACTGAACGGTAAGAGGGATCGATTAAGGCTAATTAAGCCTAATTAATCCCATCATTATCAAATGATTACTGTAGCAACACGATTGTCAAATCATGGACTAATTAGGCTTAATAGATTCATCTCGCTGTTTAGATTCGTCTTGTGTAATGGGTTTTGTAAATAGTCTACGTTTAATACTCCTAATTAGTATCTAAACATTCGATGTGACGGTTGCTAAAAATAAGTCAGTGGAAGAAAACGGGGCCTAAGCATCAAAAGCAAAGATAGGGAGCAGGAAAAAGCAAGCGCATTCAGAAAAAAAAAAACATATGGAG…	363
ba670	DEL	Chr2	3429432	3429809	GAACATATCCAGTAGAAACCACACCCTTCATGAAAACCTGTGCAAACCAAAATAAAAATTCGTCTAAATTCACAAAAAAAATCACACATGTAGATGATATATGATGATACACATCCTTGTAAAATATCTTGTCCAAACTCAACTTCGTTTGTGAGATATAAAAATAAAAGATTCTAATAAATCATTTGGACAACTTTCAGCCTTGGTATTTGTTATTTTTATATCTCACAAACGAAGTCGAGTTTGGACAAGATATTTTACAAGATTGTTCATCATCATATTATCTATACGTGTGATTTTATTGGTGAATTTATATGACTTTTTTACGTGGTTTGCACAGGTTTTCATGAAGGGTGTGGTTTCTACTAGATATGTTC	389
ba671	DEL	Chr2	3442344	3442506	ATGATACTTCAGTTCAACAGTAATCAGGAAACAATCTAAAATGTTGGAGTATGTGTGTATTATGGCCCAATAAGGCCCATGTATGACTACTGTATAGCTACCCTTCTAGGGTTAGCCCAATAGACAAGGAATTACATCTCTATCAAGGAATTACATCTCTAT	121
ba672	DEL	Chr2	3445948	3446088	TTTATAAATTGGACCAACTTCCTGCTCTAAGTTGGGCTAATCTTTTATTTGCCAAAGAGAGTTGGAGCTATAGATTGGACCAACTTCCTGCTCTAAGTTGGGCTAATCTTTTATTTGCCAAAGAGAGTTGGAGCTAGCTC	114
ba674	DEL	Chr2	3489687	3489971	AACAACTAAACACATCTTATTTGACTACCATGCCAAAGCAATTTTGACACTATGCAAAAAGAAGATTCCCCATCACATCAAACTTGCGGTACATGCATGGAGTACTAAATGTAGACGAAATTAAAAACTAATTGCACAGTTTTGTTGTACTTTGCGAGACGAATCTTTTAAGCCTAATTAGTCAATATTTGGATAATAATTCACAAATACAAACGAAACGCTACAGTGTGCTACAGTGTTGTAACAGTAATTTGGTACCTCCCAAATTTCCCAAGTAAACAAGG	251
ba676	DEL	Chr2	3542448	3542795	GACAGGGCGTTTGGTTCCTTTGCTTATTTTTAAGCAAGTGTCACATCAATGTTTAGATACTAATTAGGAGTATTAAACGTAGGTTATTTACAAAACCCATTACATAAGTGGAGGCTAAACAACGAGACGAACCTATTAAGCCTAATTAATCCATCATTAGCAAATGTTTACTGTAGCAACACATTGTCAAATCATGGACTAATTAGGCTTAATAGATTCGTCTCGCCGTTTAGCCTCCACTTATGTAATGGATTTTGTAAATAGTCTACATTTAATACTCCTAATTAGTATCTAAACATTCGATGTGACGGGTGCTTAAAAATAAGCAAACGAACTAAACCAGGCCA	346
pD1442	DEL	Chr2	3599607	3599887	AACCTGGGCCTTGTTTAGTTGGTTAAATTGGGAGGTGCCAAATTACTGTGCTGGCACTGTAGCACACTGTAGCGTTTCGTTTGTATTTGTGCATTATTGTCCAAACATTGACTAATTAGGCTCAAAAGATTCGTCTCGCAAAGTACAACAAAACTGTGCAATTAGTTTTTAATTTCATCTACATTTAGTACTCCATACATGTACCGCAAGTTTGATGTGATGGGGAATCTTCTTTTTGCATAGTGCCAAAGTTAGGAGTTGGGGGTGAAGTAAACAAGGA	278
ba684	DEL	Chr2	3679108	3679480	GATCATTGGAATTGAATTCCATCCTAATAATTATAATTTAGACACAAATTAATTAAGCTAATATAATTGTATGTGGAATATAGTTGTATATTATAGTTGGTGATATGGGAGAGATACTTATATGCTGCACTTCTACCATAGAGAAGCGAGTCCAAGAGCGTGCTATAAGAATTGAATTCCATTCTAATAACCATAATCTATAGAATCAATTTCCATCTCTCACCCCATGAATTTAAGATAGGTTTATATCTAAACTTTGGAAAGTTGTGGAATGCCACATTCCAACATAAATTAGCCTACTCCATTAAATAGATTCCAATTCCTTCAAAATGAAAGGACCCAAACGGGACCCAAGAGAAGTTGTTTTAGAGG	364
ba685	DEL	Chr2	3684001	3684275	AGTTGCCCTGAATTTGGGTGTCCAAAATTACTGCTGTAGCACTGTAGCACACTGTAGCGTTTCGTTTGTATTTGTAAATTATTGTCCAAATATTGACTAATTAGGCTTAAAAGATTCGTCTCGCAAAGTATAACAAAACTGTGCAATTAGTTTTTAATTTCGTCTACATTTAGTACTTCATGCATGTACCGCAAGTTTGATGTGACGGGGAATCTTCTTTTTGCATAGTGTCAAAATTGGAAGTTTTGGTGTAACTAAACAAGGCCACAGTTTT	230
ba686	DEL	Chr2	3694785	3695200	CTAAACACGTGGTTTCGCAAAATTGACACCCTAAAGATGGACTTCGTAAAATTGACACCCAAAACGTGAACACCTTGATTTTCTTGACATTTTGCATTATTTAGTCATTTTATTTTTTATTTTCCATTTGACAGGCTAGTGCAATGACCAAATTGCCCTTTTGTTACCTGGTACGCTCGGTTGGGCAAATTAATCGCTGCCCAGGTCTTTTGGGCGCCGCCATTCCGATCTTCGACGCCATCGCGAGGAAGACGCGCGCCGAGTCCGGGGAAATCTGTCGCGAGGCAAGACGCCGTTCCAGCAGCTCGGAGTCCGGCGATCCCAGCCGGCCGCGACGAGCTCCGCTGCCTCGTCATCCTCGCTGCGTGTCGTGTGCTACCGTCTCCGGTGAATTCTCGG…	376
ba687	DEL	Chr2	3719346	3719605	CCCCAACTCCTAACTTTGGCACTATGCACAAAGAAGATTCCCCATCACATCAAACTTGCGGTACATGCATGGAGTACTAAATGTAGATGAAATTAAAAACTAATTGCACAATTTTGTTGTACTTTGCGAGACGAATCTTTTGAGCCTAATTAGTCAATGTTTGGACAATAATTCACAAATACAAATGAAACGCTACAGTGTGCTACAGTGCCAGCACAGTAATTTTGCATCTCCCAATTTGGCCAACTAAACAAGGCCG	273
ba694	DEL	Chr2	4090468	4090846	GCCTGCAGCGTCTAGTGTACAGTGTAACTGCAGGTAGGCGTAACTTCACTGCAAAAACATTTTCAGGGGAACACTTATCTGTGTACGTGATCCACCACTCTTCTTCGGCCTTGTTTAGTTGGCCAATTTGGGAGATGCAAAATTCATGTTCCAGCACTGTAGCACACTGTAGCGTTTCGTTTGTATTTGTGAATTATTGTTCAAATATTGACTAATTAGGCTCAAAAGATTCGTCTCGCAAAGTACAATAAAACTGTGCAATTAGTTTTTAATTTCATCTACATTTAGTATTCCATGCATGTACCGCAAGTTTGATGTGATGGAGAATCTTCTTTTTGCATAGTGTCAAAGTTGGGAGTTGGGAGGTAACTAAACATA	276
ba695	DEL	Chr2	4124721	4124845	AGTGCTGGCTGTACAGCAGCAGCCCAGCCCAGCGCGTCAGCCACTCGCTGTGATGAACGCGGGCTGCAGCAGCAGCAGCGCTGCAGCTGTGCAGCCATCACTACGCCCGTGATGTATGAGGCCA	128
ba696	DEL	Chr2	4133181	4133526	TTTGGTTCCTTTGCTTATTTTTAAGCAAGTGTCACATCAATATTTAGATACTAATTAGGAGTATTAAACGTAGGCTAATTGCAAAACCTATTACATAAGTGGAGGCTAAACAGCGAGACGAACCTATTAAGCCTAATTAATCCATCATTAGCAAATGTTTACTGTAGCAACACATTGTCAAATCATGGACTAATTAGGCTTAATAGATTCGTCTCGCCGTTTAGCCTCCACCTATGTAATGGATTTTGTAAATAGTCTACGTTTAATACTCCTAATTAGTATCTAAACATTGATGTGACACTTGCTTAAAAATAAGCTAATGGAACCAAACCAGGCCTAAGTTCG	349
ba698	DEL	Chr2	4150730	4150870	AAAGTTTACTTCAATTTGACATTCTTTGTGCATATCTTCATCTTCACCAAAATAACTCTTATGTAGTTTCAATACCTAATAATATATACTCCCTCTGTCCCAAATTACTATACGTTTTGGCTTTTTCTAGATACATACCT	107
ba699	DEL	Chr2	4165315	4165640	TAAAGTTTAGTCCGTGTCACATCGGATATTCGGATGCTAATTAGGAGGATTAAACATAAGCTAATTACAAAACTAATTGCAGAACCCCTAGGCTAAATTGCGAGACGAATCTATTAAGCCTAATTAATCCATCATTAGCGAATGTTTACTGTAGCAACATATTGTCAAATCATGGACTAATTAGGCTTAATAGATTCGTCTCGCGATTTAGCCTAGGGGTTGTGAAATTGGTTTTATAATTAGTCTATGTTTAATACTCCTAATTAGTGTCCAAACATTCGATGTGACAGGAGCTAAAATTTAGCCCGGGGATCCAAACACCCCC	352
ba733	DEL	Chr2	4354785	4355031	ATGCACCAACTTTACATTGAGGGGCCGGAGTTAACTTGGATCATAGTGTACTGCCAATTTTATTTGCTTTCCTTGCAGCTGTGTGCTCCTTTTGCGGATCATATACTAGGTTTTTTTTGAAACGAACGTGACAGGAGAGCTGCTGATTATATTAAAAAGAAGGAATCCAGACTGGATAAATACAATGGATCAAAAATGAAATGAGGCAAAATTGAGCCAGGAAAAGATCACGTACTAGGTAGGCAT	142
ba735	DEL	Chr2	4363763	4364146	AAAGGTTCCATACTCCAATTTCTTCATATAATAAGGGGGTGTTTGGATACGAGGTGTTAAACTTTAACAGTGTCACATCGGATGTTCGGATGCTAATTAGGAGAACTAAACATGAGCTAATTATAAAACTAATTGCAGAACCCTGTGCTAATTCGCGAGACGAATATATTAAGCCTAATTAATCCATCATTAGCAATTGGTTACTGTAGCACCACATTGTCAAATTATGGACTAATTAGGCTTAATAGATTCGTCTCGTGAATTACACTCCATCTGTGCAATTAGTTTTGTAATTAGCCTATGTTTAATACTCCTAATTAGCATCCAAACATCCGATGTGACAGGTGTTAAACTTTAACCCATGGTTGCCAAACAGGCCCTAA	388
ba737	DEL	Chr2	4378444	4378558	CAACAGCAGCCGTCACTAATATGTCATTGCGGTTTGCCTAGGTGACACGTTTCTACAACCCGCATCACTAATGCTGAACTAGTGATGCATTTTTATCTCACGTCACTAAATATA	120
ba742	DEL	Chr2	4400604	4400961	TACATTAAGGCCCCGTTTGGATCCAAGGAATTGGAATCTATTTAATGGAGTAGGCTAATTTATGTTGGAATGTGGCATTCCACAACTTTCCAAAGTTTAGATATAAGCCTATCTTAAATTCATGGGGTGGGAGATGGAAATTGATTCTATAGATTATGGTTATTAGATGGAATTCAATTCTTATAGCACGCTCTTAGACTCGCTTCTCTATAGTAGAAGTGCAGCATACAAGTATCTCTCCCATATCACCAACTATAATATACAACTATATTCCACATACAATTATATTAGCTTAATCAATTTGTGTCTAAATTATGATTATTAGGATGGAATTCAATTCCAATGATCCAAACGGGG	362
ba743	DEL	Chr2	4413593	4413738	ACCTTAGGGGTTAAATAGTAGAGATTAAGGGCTAGAGCTAGAAATTAATGGTGATTTGAGACTTTATCTACAGTATTTTATAGGTAAAATCGAGCTCTCGGGAGGGGGGGGGGGCTGCAGGCCCTAGCCCCCCTTGGATCCGCCC	173
pD1548	DEL	Chr2	4418369	4418480	CCAAAAACATATCCATGGATGGATATATATGATCCTTCCTTTATATTCGATATTAGCAATGCCATACTCTATATATTTACTCATTCTGACGACGGCTACTACCACCGCAAA	106
ba750	DEL	Chr2	4467829	4468183	AGAGCAACTCCAAGAGGCTGCTAATCTTACCCCAATACCTTTTTTAGGAAAAAAGAGAGAAAAAATGAACTCCAACAATCCACCTAAACATTCCCCAATTTTTTAGCGACGCTAAAAAACAGCCTACCACCGCGTATATTTTAGCGTTGGCGTTCCTCCCCCAATCCTGATTCCCGCACGCCCGCGTGTCTCTTCCGATGGGCCCAATACGATGACGTGGCCTATGTTTGAAATATTGGGGGCTATTTATTAGCGATCTGTTGTGGATTGATATGTTTTTGGGAGAAATTTTTTTTGGAAGAACCCCCAATACATAGTTTTGGGGAAGAATTTTTTAGGATACTCTTGGAGTTG	316
ba755	DEL	Chr2	4491099	4491213	ATGGGCCTGTTCGCTTCAGCTTATAAGCCGGCTGAAAAGCTGAAACGGCTGATTTGTTGTGAGAGGAAAATACTGTTTGGTGGCTGATAAGCCGGCTGAATAAGCTGAACAGGA	112
ba758	DEL	Chr2	4527535	4527955	GACTGAGGAGGTTGACTGAATCTCTGAGCGAACTAGTAGTACCTTCTCTACTGGGTTGACACTGACACTGAGAGACGAGGGGTGTTTGGATACCACCCGCTAAAATTTACCACCTGTCACATCAGATGTTTGGATACTAATTAGAAATACTAAATATAGGCTAATTACAAAACTAATTGTACAGATAGAGTCTAATTCGCGAGACGAATCTATTAAGCCTAATTAGTCCATGATTTGACAATGTTGTGCTACAGTAACCATTTGCTAATGATAGATTAATTAGGCTTAATAGATTCATCTCGCGAATTAGCTTAGGGGTTCTGCAATTAGTTTTATAATTAGCTCATGTTTAATCCTTATAATTAGCATGGAACATCCGATGTGACACTGCTAAAGTTT…	350
ba760	DEL	Chr2	4539824	4540159	CGTTTGGTAGGGCTTCTCAAAGTGCTTCTTCACCGACTTTTGATGAAGCCCTACCAAAGGGTCAATTTCAAAACGGCTTCACCACCAAAGCTAGGGAGAAGCCGCAAAACGGCTTACAGAAGAGAGGAGAAGCCGAAAAAAGTGGCTTCACCGGCTTCTCCTCTCTCTCCAAGCATTAAGTGATCATAAAATTACATATATTACCATTGAGAAGCCGTTTTACCAAACGTTTTGCAAAACGGCTTCAACTTCACTAAAAAAGCCACTCCACCGAAGAAGCTGAGGCCGAAGCCGTTTTATGAGAAGCCGAAGCTCTACCAAATGGGCCCTTATCA	332
pD1596	DEL	Chr2	4729962	4730312	TTAAGGGGTGTTGGATACAAGGTACTAAACTTTAGGAGGGTCACATCGGATGTTCGGATGCTTATTAGGAGGACTAAACATGAGCTAATTATAAAACTAACTGCAGAACCCCTATACTAATTTGCGAGACAAATCTATTAAGCCTAATTAATCCATCATTAGCAAATGGTTACTGTAGCACCACATTGTCAAATCATGGACTAATTAGGTTTAATAGATTCGTCTCGTGAATTAGACTCCATCTGTGCAATTAGTTTTGTAATTAGATTATATTTAATATTTCTAATCAGTATCTAAACATCCGATGTGACATGTCCTAAAATTTAGGACGCCGGATCCAAACGGGCCCT	348
ba824	DEL	Chr2	4891190	4891417	GAGCACGAGGCGGTGCCTATTTCATTGATAGAGTAGGAAAAAACAGAGGAAAACCCGACAGATCGGGGAGAAAAAGAAAGACAAAAGGAAAAAGGCAAAAAGGGGCCAAGATGGGACTACTCGTGTGATAGAAGAATCGCTAGATCTTTGGCCCCCGCCAAGAGCCAAACTGAGGCCTCATCTTTGATTTTCATCATTAGGGTTGTCGGTGATGTTTCGTGCCGGTG	224
ba825	DEL	Chr2	4892532	4892778	CTTGATAGGGATACTATAACCTAGGTCCCTTAACTTGGAATGGATGGCGGAGCGTAGGTGGCAGGCAGTTATATGGATACGGTGCTTTACCCGTAGACGCTTCTCCAGCTCTCGCAAGAATTGTATGGGAGTCGTCCTCGGGGGGACTTCCCGAATGACCGTACCGGGAAATTCTACCGTACTCCGTGCAGCTATGGTTGTTGATCCTACGGAGCCTACCCAAAGGTTCAGGCCGGATTGTAGGAA	324
ba828	DEL	Chr2	5019995	5020303	GAATTAAGTTTAATAAGGCCTCGTTCGGTTTCACCGGATTGGCCCGGAATGAGGTCCATTCCGGATGGTTTGAAGTGACCCGGTTTGAAACCAGACTTGCATTGAAAGTGTTGTTCGTTTTAGTCTGGCCTGGAATGAAAACCGGCCTGGATTGGAATCCTTCTACATTAGATGGCCCGGATTGAAACCATACCTCCTCACCCCTGGAATGAATCCTGACCGGATTGAGTGACACGGGTGGAATCACTCAAACCGGACCTGGAAGTAATCCTAGCTGGAATCCAATCCTGGTGAAACGAACGAGGCCT	287
ba831	DEL	Chr2	5031522	5031635	ATAGCGTATTCTCTTATCTAAGCTTCCTCCCTTCGCTCCCCCCCGCGTGGTCCAATGATCTTTTATACATTTTTTCAGTGCAATTCAAAAAAAAAAGAAAATTAAAATTATCA	133
ba832	DEL	Chr2	5045159	5045414	TTGGGAGGTGCCAAATTGGCATTTTGCCATAAATGCGACACTGTAGCGTTTCGTTTGTATTTGTGAATTATTATCCAAATATTGACTAATTAGGCTCAAAATATTCGTCTTGCAAAGTACAACAAAACTGTGCAATTAGTTTTTGATTTCATCTACATTTAGTACTCCATGCATGTACCGCAAGTTTGATGTGATGGGGAATCTTCTTTTTGCATAGTGTCAAAGTTGGAAGTTTGGAGGGAAGTAAACAAGGGC	282
ba835	DEL	Chr2	5074770	5075066	CAACGAGACTAGTATAAGCCCTTGTTTACTTCCCAAAGTTGGGAGGTGCCAAATTGGCATTTTGCCATAAATGCGACACTGTAGCGTTTCGTTTGTATTTGTGAATTATTGTCCAAATATTAACTAATTAGGCTCAAAAGATTCGTCTCGCAAAGTACAACAAAAATGTGCAATTAGTTTTTGATTTCGTCTACATTTAGTACTCCATGCATGTACCGCAAGTTTGATGTGATGGGGAATCTTCTTTTTGCATAGTGTCAAAGTTGGGAGTTTGAAGGGAAGTAAACAAGGGCTAA	274
ba836	DEL	Chr2	5075584	5075810	AAAGTATATATACTTTTGCTACATTTGATAGATATATTGCAACGATATGTTCTATATTCTGCAGGCCGATATCCGAAATGCTACTTGCTTGTGGCCGTGCGTACGTGCAACCATGGGCCTGTTCGGCTGGACTTATAAGCCGACTAAAAAGCTGAAACGGCTGATTTGTTGTGAGAGAAAAATATTATTCGGTGGCTGATAAGCTGAATCGACCAGGCTACATGTA	230
ba839	DEL	Chr2	5112610	5112978	CAATCTACTCCCTAATTAGATTTTTCTTTTTCGTTTCTTCGCATACAAATTGAATTTTAATTTTAGATTTTGTCAGTTGACTTATAACATGATGCTCCATGTTAAAAAAAAATATATTAGAATTTTTTCATGATTACTTTTCCTACAGTTTTGCATATCTAAGATCAATTTCGTATTAAATATTCCTAACCTATGATGAAAATAACCATGAAAATTCTTAGTATAATTTTCTAACATAAGGTATCATGTTTTGTATATGCTCACAAAATTTGAACTCAAAATTCAACTCATACATGAAGAAACAAAAAGGAGAAATCTAATTAGGGGGTAGATTGGACCAAATGAAATAGTTCAGGGAGCAAAGTAAG	381
ba840	DEL	Chr2	5124867	5125019	CGCTACGAATTAATATTAGGAATAATCTAATTTTTGTTCATTCCCTAGCTGTGATAATGTTGAGTTTGAGCCAAGAGAATATAACAAATTAAAGTAGAGTATGGGAACATGGTTAATGGAATTTTATATATGTTTTTGTAAAAAAAAAAGAA	106
ba861	DEL	Chr2	5408344	5408493	CGGTGAGTGCCCACCGTTCGATACTTACCCAACATTATTACGCATGGAAACATCTACCTGGCCTTTTTTTTTTCGAACTAATGGCAGGAGTACTACCTTTCATTTAAGAGGAAAGAGTTTAGAAAGTACGATTACAATTTTAGCGACTT	115
ba870	DEL	Chr2	5556476	5556739	AGTTCCCTCCAAACTCCCAACTTTGACACTATGCAAAAAGAAGATTCCTCATCACATCAAATTTGCGGTACATGCATGGAGTACTAAATGTAGACGAAATTAAAAATTAATTGCACAGTTTTATTGTACTTTGCAAGACGAATCTTTTGAGCCTAATTAGTCAATGTTTGGATAATAATTTACAAATACAAACAAAATGCTACAGTTGCGTATTTATGGCAAAATGTCAATTTTACCACTCCCAAATTGGGAACTAAACGAGG	276
ba879	DEL	Chr2	5733692	5733942	GGCGCGGGTGTCGAGGACGAGGTCGCTGAAGTGCGGCGCGGAGACGGTGTGCGGCGCAGAGGTAGCAAAGCCGAGGTAGAAGGCGGAGCGCAGCACGTGAGCGTGAGGCAAGAAACGGGTCGACGAGCAACTCGAGCGAGACCGCTCCAGGCAGCTCCAGCACGAATATTGAAGCAGATTGGACGGTAGGAGATAATATGTGGTGCAACGACCGGCTGTGGGATTGTATTTCCGGCCCATCGTGTGTTTC	173
ba880	DEL	Chr2	5737067	5737440	GAAGCCAAAATTCAACAGCTGAGATTAGAAATAAAATATTTGCTCAAAATTAACCACCATACCATTGATTAGTGCATATCAAAATAAGTCAATATGCCGCACATGCCACGTACTCCCTCCGTTCCAAATTATAAGTCATTCCAACTTTCTTGGAGAGTCAAAGCATCTCAAGTTTGATCAAATTTATACAATAAAGTGCTAATATTCATGATATCAAATAGGTACCATTAGTTTCTTCATTAAATATATTTTCATAATATATCTATTCGATGCCATAAACTTTTGTGATTTTCTCTATAATTTTAGTCAAACATAAAAATGTTTGACTCTCCAAGAAAGTTGGAATGACTTATAATTTGGAACGGAGGGAGTA	264
ba881	DEL	Chr2	5740837	5741139	GGTTGGCTCAAATGTAACGTAATCTGATTACTGAAGGTAACGAATCCCATTACATATGTTTGGTTGCGGTGGTTTGTAATCAATTGACACTATAATCGAATCCCTTATCTAAATAGTATCTATACAAGCTTGTTACCCCTCCTCCCCCACCGTAATCGGATATAGCACCCACACAGTAATCTGATTACGTTACCAGAGTGCAACCAAACAAAGAGGGCAATCACCTATTCCACCTCTAAATACACTGTAATTTGATTCCCTTTGCGTTTACATTACCTTAGCACGAACCAAACACTATCTTA	310
ba886	DEL	Chr2	5825492	5825698	AGCCACTGCCCGCCGACGTCGCCGCGCTGCTCCATCACCGTGACTTCGAGGCCTTCGCGCCGCAGCTCGCGCGCTGCCGCCAGCCCGGACATGCCCGCGCCGACGACGCACACCTTCTCCTTGGGCCTGTCCGTAGCCATATCGATCCACGAGATTGATGGATTCACACATGCATGCAACTATTGCCTCTGACATTTTATCAGAAT	109
ba898	DEL	Chr2	8056955	8057280	CTAAATTTTAGCCCCCGTCACATCGAATGTTTGGACACTAATTAGGAGTATTAAACCTAGATTAATTACAAAACTAATTACACAACCCCTAGGCTAAATCGCGAGACGAATCTATTAAGCCTAATTAGTGCATGATTTGACAATGTGGTCCTACAGTAACCATTCACTAATGATGGATTAATTAGGCTCAATAGATTCGTCTCGCGATTTAGCCTAGGGGTTCTGCAATTAGTTTTGTAATTAGCTTATGTTTAGTCCTCCTAATTAGTATCCGAACATCCGATGTGACAGGGCTAAAGTTTAGCCTCCTCCTTCCAAACACCCC	350
ba907	DEL	Chr2	8745020	8745323	AGCCCTTGTTCTCTTACCTTCAAACTCCTAACTTTAACACTATGCAAAAAGAAGATTCCCCATCACATCAAACTTGCGGTACATGCATGGAGTACTAAATGTAGACGAAATCAAAAACTATTTGCACAGTTTTGTTGTACTTTGCGAGACGAATCTTTTGAGCCTAATTAGTCAATATTTGGACAATAATTCACAAATACAAACGAAACGCTACAGTGTTGCTACAGTAATTTGGCACCTCCCAAATTCGCGAAGTAAACAAGGGCTAAATAAATGTATTATCTAGGATCGGCCCGAGGCCAC	262
ba909	DEL	Chr2	8772014	8772387	CCGATGGAAGTGGGCAAGGAAAATAGTATTAGGGGTGTTTGGAAAGGGGTGCTAAACTTTAGCACCCTACTTTTAGCACACTTTTAGCACTTGAACTCCCAAACAGAGGTGCTAAAAGGTGAGTACTAAAGTTTAGCACCCTTGTTTTCTTTAGCACACCCAAGGAGTGCTAAAAGGTGCTAATGGGTGCTAAAAGTGGTTCCAAGTCCACTTTTTCCCTAGTTGCCCCCTCTCTCTCCTCTCCACTTTTCCCCAAGCCAGTCATAAATGAGGGCAATGCAGTCATTTCTCACCTAAGATGCTAAACTTTAGCACTGTATATAAACAACACCAAGTGCTAAACTTTAGCGCTCTATTTCAGGGTGCTAAACTC	345
ba913	DEL	Chr2	9013061	9013438	TTTTGGACCAAAACTGGAAAGTTAGGGCCTGTTTTCTTCCACTTGCTAAACTTTAGCAGCCGTCACATCGAATGTTTAGATACCAATTAGGAGTATTAAACGTAGACTATTTACAAAACCCATTACATAAGACGAATCTAAACGGCGAGACGAATCTATTAAGCCTAATTAGTCCATGATTTGACAATGTGTTGCTACAGTAAATATTTGCTAATGATGGATTAATTAGGCTTAATTAGTCTTAATAGATTCGTCTCGCCATTTAGATTCCACTTATGTAATTGGTTTTGTAAATAGTCTACGTTTACTACTCCTAATTAGTATCTAAACATTCGATGTGACACGTGCTAAAAATAAGACACGGGAAGAAAACGCCC	360
ba914	DEL	Chr2	9037538	9037838	TTAAAGTTTAACACCCATCACATCGGATGTTTGATGTTAATTAGGAGTATTAAACATAGATTAATTATAAAACTAATTGCACAGATGGAGTGTAATTAAGCCTAATTAGTTCATGATTTGACAATGTGGTGCTACAGTAACCATTTGCTAATGATGGATTAATTAGGCTTAATAGATTCGTCTCGCGAATTAGCAAAGGGGTCTGCAATTAGTTTTATAATTAGCTCATGTTTAGTTCTCCTAATTAGTATTCGAACATCCGATGTGACACTGTTAAAGTTTAACACCTCGTATCCAAAC	326
ba916	DEL	Chr2	9041929	9042319	TGAAGCTAGCTGCTATATATGGTATGTAGCTAGTGGATGAGCCACTCAGGGCCTGTTTGGCTATATGGTGTTAAAGTTTAACACCCGTCACATCGGATGTTTGGATACTAATTAGTAGCATTAAATATAGATTAGTTACAAAACTAATTGCACAGATGGAGTGTAATTCGCGAGACGAATCTATTAAGCCTAATTAGTCCATGATTTGACAATGTGGTGCTACAGTAACCATTTGCTAATGATGGATTAATTAGGCTTAATAGATTCGTCTCGCGAATTAGCACAGGGTTCTGCAATTAGTTTTATAATTAGCTCATGTTTAATTCTCCTAATTAGCATCCGAACATCCGATGTGACACTGTTAAAGTTTAGCATCTCGTATCCAAACAC	349
ba923	DEL	Chr2	9600356	9600930	ATATTGGTATAAAACTGATGTAGCTTAATTCACAAACCCAATGGGCTGCAACGTAACAAAGACAACGATGCAGCCTTGACGAGAGGGAATGGTCAGGTATAGTAATGACCATCAAACTGTCAGTTGCAGGTAACCGCACAGATTCATTCCACCGTGAGTTACTTGTAACAGACACCAGTTACAAACTGCGACCAACTGATCCTCACCTGCCCTTTTGCCGCGCTAGTTTGGTCCCAGCTGGGGATCGACACTAGGGGCTGCAAAGTTTCAGCGATATCTACTGTTCCCCATCCAACAAGACTGCCGTCTGAGCACTTCGACTGCTTTCTCCTCCTAGTCACCTGGCAGCTATGGAAGCACCGCAAGGACATGGTGTTGAACGAAGCGCACCCATACCTT…	138
ba935	DEL	Chr2	10104865	10105052	GGTGCACCTCGGTCGGTTTTTGGACGCCGCGAGGCGTAGTTGAGTGTATATAAGGCGCTCTTTCAGTTTACCTCCTACCAGTGTTCTAAGCTCGCAGTGCGCAGCATGTAATTACTTAATTGTTTCGCCTTCGGGCACTCCTCTTTTTTAATACAGCGGCAGCTCTCCTGCCTGCTCGTTTCAAAAA	223
ba938	DEL	Chr2	10277795	10278154	ACCTGGAGTACCATTTAAGGCCTGTTTGGCTCTGGGGTGTTAAAATTTAACACCTGTCACATCGGATGTTTGGATGTTAATTAGGAGTATTAAACATAGGCTAATTATAAAACTAATTACACAAATGGAGTGTAATTTGCGAGACGAATCTATTAAGCCTAATTAGTCCATGATTTGACAATGTGGTGCTACAGTAACCATTTGCTAATGATGGATTAATTAGGCTTAATAGATTCATCTCGCGAATTAACACAGGATTCTGCAATTAGTTTTATAATTAGCTCATGTTTAGTTCTCCTAATTAGCATTCGAACATCCGATGTGACACTGTTAAAGTTTAGCACCTCGTATCCAAACAC	359
ba939	DEL	Chr2	10359003	10359262	AGTTAGGGAATTTGGGAGGTGCCAAATTACTGTTACAGCACTGTAGCACACTGTAGCGTTTCGTTTGTATTTGTGAATTATTGTCCAAATATTGACTAATTAGGCTCAAAAGATTCGTCTCGCAAAGTACAACAAAACTGTGCAATTAGTTTTTAATTTCATCTACATTTAGTACTCCATGCATGTACCGCAAGTTTGATGTGATGGGGAATCTTCTTTTTGCATAGTGTCAAAGTTGGGAGTTGGGAGTAACTAAACA	280
ba945	DEL	Chr2	10455246	10455790	CATAGACTTTAATGTGACTTGAGGGTCCTTTCAGGAACCAGTGCTTACTTTATAACTTGCAGGGACAGGCAAGCCAATATAGAGGATTTATAGACTGTGCTCAAACTATTCTGCGAGAGGAAGGGGCTGGCGCTTTCTTGAAGGTAAAACCTTTTCAATCGAAGTAGATGCAGTAACAAGAATGTACATGAGTTCACAATGATGATGAGAAATGGCATAAACTTTACATCCTGTTGCATTTCAAATACTACGTGGTCCGTGTTTGTGAATTTTCGCTTGTTATACGTCTCCTATCTCAATAATAAAGCAATGAATAGAATAGCTGGGCGCAACTTTGGATTCAATTGTAAATGCTGGGGGCGTGCAATTTGATTGATGTATATACCATTCTGGTGGTGG…	124
ba946	DEL	Chr2	10517677	10517885	CATGTCGAAGTACGAAGATAAGAATGATTTGACCTCGTTAATCACGACAGTGTTAGTCCCAAATATAAGTATATTATCCACATACAAGCACAAGATCATTGTTTGATCCCCACCATGGTGATAATATACACACTTATCTGTTTCGTTTATAGCAAAACTAGCAGACGTTAAGGTTTGATCAAATTTTTCATGCTATTGTTTGGGTGCT	134
ba953	DEL	Chr2	10610288	10610544	TTACTTGGTTAAATTGGAAGGTGCCAAATTACTGTAGCAACATTGTAGCGTTTCGTTTGTATTTGTGAATTATTGTCCAAACATTGACTGATTAGGCTCAAAAGATTCGTCTCGCAAAGTACAACAAAACTGTGCAATTAGTTTTTAATTTCATCTACATTTAGTACTCCATACATGTACCGCAAGTTTGATGTGATGGGGAATCTTCTTTTTGCATAGTGTCAAAGTTGGGAGTTAGGAGTGAAGTAAACAAGGG	272
ba961	DEL	Chr2	10741135	10741252	CAACGGAAAAATATAGAAGCAATCATATCCATTCACGACGCTGGTATCATGTTGAACGTTATTCTTTATCTGTTACATACGAGGAGAATTACTAAACCCAGCGGAAGGAACCATGCA	146
ba970	DEL	Chr2	11020150	11020488	CGTGTCTTATTTTTAGCACGTGTCACATCGAATGTTTAGATACTAATTAGGAGTAGTAAACGTAGACTATTTACAAAACCAATTACATAAGTGGAATCTAAACGGCGAGACGAATCTATTAAGCCTAATTAAGCCTAATTAATCTATCATTAGCAAATATTTACTGTAGCAACACATTGTCAAATCATGGACTAATTAGGCTTAATAGATTCGTCTCGCCGTTTAGATTCGTCTTATGTAATGGGTTTTGTAAATAGTCTGCGTTTAATACTCCTAATTAGTATCTAAACATTCGATGTGACGGGTTCTAAAAATAAGTCAGTGGAAGAAAACGGGGC	366
ba972	DEL	Chr2	11052250	11052614	AGAGTACTCCAAAAAATTCTTCCTCAAAACTATGTATTGGGAGTTCTTCAAAAAAAAATTTCCCAAAAACATATCAATCCACAGCAGATCGCTAATAAATAGCTTCCAATATTTTAAAACAGGTCACGTCATCGTATTGGGTTAATCGGAAGGGACGCGCGAGCTTGCAGGAATCAGGATTAGGGGAGGAATGCCAACGCTAAAATATACGTGGTGGTAGGCTATTTTTTAGCGTTGCTAAAAAATTGGGGAAGGTTTGGAGTTCGTTTTTTCTCCTTTTTTCCTAAAAAAAAGTATTGGGAGTAAGATTAGCCGCCTCTTGGAGTTACTCTTAGAACATATAAATTTTGTATGATCTCAGTTA	340
ba979	DEL	Chr2	11193138	11193465	CTTTGTTGCTCCTTTTAAATATAGCAGGGACAGCGGAGATTGAATGGACGCAAAATCTTTCTAGTTGCTAAAATTTGGAGTGTCAAAATTACTGTGCTAGCACTGTAGCACACTATAACGTTTTGTTTGTATTTGTGAATTATTGTCCAAACATTGACTAATTAGGCTCAAAAGATTCGTCTCGCAAAGTACAACAAAACTGTGCAATTATTTTTTAATTTCATCTACATTTAGTACTCCATGCATGTACCGCAAGTTTGATATGATGGGGAATCTTCTTTTTGCATAGTGTCAAAGTTAGGAGTTGGGGTTGAACTAAACAAGGGC	263
ba983	DEL	Chr2	11258863	11259132	TGGGGCCTATTTAGTTGCCCGATTTTGGACAACCAAAATCATTGTGACTGCATTGTAGCATACTGTAACGTTTCATTTATATTTATGAATTATTGTCCAAATATTGACTAATTAGGCTCAAAAGATTCGTCTCGCAAAGTACAACAAAATTGTACAATTAGTTTTTGATTTCGTCTACATTCAGTACTCCATGCATGTACCGTAAGTTTGATGTGATGAGGAATCTTCTTTTTGCATAATGCCAAAGTTGGGATTTTAGGATAGGCCTT	265
ba987	DEL	Chr2	11442378	11442627	TCCCAACTTTGACACTATGCAAAAAGAAGATTCCCTATCACATCAAACTTGCGGTATATGCATGGAGTACTAAATGTAGACGAAATCAAAAACTAATTGCACAGTTTTGTTGTACTTTGCGAGACGAATCTTTTGAGCCTAATTAGTCAATATTTGGACAATAATTCACAAATACAAACGAACGCTACAGTGTCGCATTTATGGCAAATTGCCAATTTTGCAACTCCCAACTTGGAAAGTAAACAAGGC	283
ba989	DEL	Chr2	11537995	11538368	CCTTTTGTTTGTCTAAAAATCATTTGTTCCTATTTGTTTGTTGTAGTCAAAATGTTCTAGTTTAATAAAAAATATTCACATAAAACATTCATCAAAAAATGGTCAAATATGGTCTTGTTTTCAAGATATTGCCATAACAAGCATAGTGATACAATCGAAATTAAATTTGGATGGCCGGTTTAAGACTTATGATTTTTTTAGTTTCAAAATTGTGTTGAGGGGGGGCTTGACCACAATAGACCATTCCACCAAGATGGCAAGATACATCCCATTCCCATAATGGATCGACATAACTAAAGTAGTTTCACATGAAAACATAGCGAAAGTACATCCTGATGAAAAGTTAAAAAAAAAGGACAATATGAACTTCTGT	107
ba990	DEL	Chr2	11538431	11538690	TACACAATGCACATTAAATTATTGACAAAGCAAATAATAACTTCAAAAAGTTCTGAAATTTGAAGAGAAGTATACCACTAAATTGTTTTGAGGCACTAGCATACGATGTTTTTTCATCTCTTAAAACCGATTGTATGATTTTATCATTACTAATGCTTCTAAATATCTCCTTCTCAACATAGCATATCATCAAATCATTGAGCTATTCATCCCCCATTTTGCTGCGCAAATCTGTCTTTATAAGAGACAGCTGAAAAAA	331
ba991	DEL	Chr2	11581905	11582246	TTAGGCCTGGTTTGGTTCACTGGCCACCCGTCACATCGAATATTTAGATACTAATTAGAAATATTAAACGTAGACTATTTACAAAACCGATTACATAAGTGGAAGCTAAACGGCGAGATGAATCTATTAAGCCTAATTAGTCCATGATTTGACAATGTGTTGCTACAGTAAACATTTGCTAATGATGGATTAATTAGGCTTAATAGATTCGTCTCGCTGTTTAGCCTCCACTTATGTAATGAGTTTTGTAAATAGTCTACGTTTAATACTTCTAATTAGTATCTAAATATTGATGTGACACTTGCTTAAAAAAAGCAAAGGGAACCAAACGGACCCTTACT	345
ba1004	DEL	Chr2	11821572	11821731	TGGGAGGTGCCAAATTACTGTAGCAACACTGTAGCGTTTCGTTTGTATTTGTGAATTATTGTCCAAATATTGACTAATTAGGCTCAAAAGATTCGTCTCGCAAAGTACAACAAAACTGTGCAATTAGTTTTTGATTTCGTCTACATTTAGTACTCCATA	274
ba1005	DEL	Chr2	11846942	11847061	CCTTCTTTAGTTGGCCAAATTGGGAGATGCAAAATTACTGTGCCAGCACTGTAGCACACTGTAGCGTTTCGTTTATATTTGTGAATTATTGTCCAAATATTGACTAATTAGGCTCAAAA	279
ba1008	DEL	Chr2	11878113	11878411	TAGGAGTGGTAAAATTGGCATTTTGCCATAAATGCGCAACTGTAGCGTTTTGTTTGTATTTATGAATTATTGTCCAAATATTGACTAATTAGGCTCAAAAGATTCGTCTCGCAAAGTACAACAAAACTGTGCAATTAGTTTTTGATTTCGTCTACATTTAGTACTCCATACATGTACCGCAAGTTTGATGTGATGGGGATCTTCTTTTTGCATAGTGTCAAAGTTGGAAGTTTGGAGGGAACTAAACATAGCCTAAAATTGAGCACAGAATCTCCACTCCAAAACTAGAGTGAACATG	272
ba1010	DEL	Chr2	11917000	11917374	AGGCCCCGTTTGGGATGAAGGAATTGGAATCTATTTAATGGAGTAGGCTAATTTATGTTGGAATGTGGCATTCCACAACTTTCCAAAGTTTAGATATAAGCCTATCTTAAATTCATGGGGTGGGAGATGGAAATTGATTCTATAGATTATGGTTATTAGAATGGAATTCAATTCTTATAGCACGCTCTTAGACTCGCTTCTCTATAGTAGAAGTGCAGCATATAAGTATCTCTCCCATATCACCAACTATAATATACAACTATATTCCACATACAATTATATGAGCTTAATTAATTTGTGTCTAAATTATAATTATTAGGATGGAATTCAATTCCAATGATCCAAACGGGGCCTAAGAAGAATTCCCTTGAATT	357
ba1013	DEL	Chr2	11994619	11994947	AGCAGGCCATTATAAATAAATATAATTGAGAGTAAATTTTTTTTTTGGCACTTTAAGTACGCTAGCTGGCGAAATTAAGCTACAATTTTCGTACCTCTTCTTAATTTATTATATGTATAAGCTTGAAGACAACGTACTTAGGACAAGATTTCTACAATGCATTATTGTCTCTGGAACAGTAATCATGTTAATAATATAAGATATCTAAATGGCCTCCTGACCTTTATCTTTTTAAAAAAAAAAGAAAAGAAAAGAAAAGAAAAGAAAAACATGACTCGAGTCATTTCTTTCACTATCACTTATTAGCTAATAAATTAAAGAGACAACC	291
ba1016	DEL	Chr2	12036625	12036965	GGTCCAAGGAATTGGAATCTATTTAATGGAGTAGGCTAATTTATGTTGGAATGTGGCATTCCACAACTTTCCAAAGTTTAGATATAAGCCTATCTTAAATTCATGGGGTGGGAGATGGAAATTGATTCTATAGATTATGGTTATTAGATGGAATTCAATTCTTATAGCACGCTCTTAGACTCGCTTCTCTATAGTAGAAGTGCAGCATACAAGTATCTCTCCCATATCACCAACTATAATATACAACTATATTCCACATACAATTATATTAGCTTAATTAATTTGTGTCTAAATTATGATTATTAGGATGGAATTCAATTCCAATGATCCAAACGGGGCC	360
ba1029	DEL	Chr2	12278255	12278556	ATGTGCATATGCCTCGATGCAATTTAGCCCTTGTTTACTTCCCACAAAACTCCCAACTTTGACACTATGCAAAAAGAAGATTCCCCATCACATCAAACTTGCGGTACATGCATGGAGTACTAAATGTAGACGAAATCAAAAACTAATTACACAATTTTGTTGTACTTTGCGAGACGAATCTTTTGAGCCTAATTAGTCAATATTTGGATAATAATTCACAAATACAAACGAAACGCTACAGTGTCGCATTTATGGCAAAATGCCAATTTGGCACCTCCCAACTTCCCAAGTAAACAAGGAC	285
ba1030	DEL	Chr2	12349073	12349390	CGGTACTCGTAAACCCGTTGCTAACCAACCCGAAGGATACCACTCAGTCCCTGTTTAGTTTCTCCTAAAATTTCAACTTTAGCTCTACGCAAAAAGAAGATTCCTCATCACATCAAACTTACGTACATGTATAAAGTACTGAATGTAGATGAAATCAAAAATTAATTGTATAGTTTTGTTGTACTTTGCGAGACGAATCTTTTGAGCCTAATTAGTCAATATTTGGACAATAATTCACAAATATAAACGAAATGCTACAGTTGCACTACAGTAATTTTGGTTGCCCAAAATTGAGCAACTAAACAAGACCTCATTTT	269
ba1046	DEL	Chr2	13909503	13909772	CATGTTTAGTTACTCCCAACTCCCAACTTTGACACTATGCAAAAAGAAGATTCCCCATCACATCAAACTTGCGGTACATGTATGGAGTACTAAATGTAGATGAAATTAAAAACTAATTGCACAGTTTTGTTGTACTTTGCGAGACGAATCTTTTGAGCCTAATTAGTCAATATTTGGATAATAATTCACAAATACAAACGAAACGCTACAGTGTGCTACAGTGCTGTAACAGTAATTTGGCACCTCCCAAATTCCCCAACTAAACACGG	278
ba1051	DEL	Chr2	14073001	14073319	AAAGTTTAACACCTGTCACATCGGATGTTTGGATGCTAATTAGGAGTATTAAACATAGGCTAATTACAAAATTAATTGCACAGATGGAGTGTAATTCGCGAGACGAATCTATTAAGCCTAATTAGTCCATAATTTGACAATGTGGTGCTACAGTAACCATTTGCTAATGATGGATTAATTAGGCTTAATAGATTCGTCTCGCGAATTAGCACAGGGTTCTGCAATTAGTTTTATAATTAGCTCATGTTTAGTTCTCCTAATTAGCATTCGAACATACGATGTGACACTGTTAAAGTTTAGCACCTCGTATCCAAACAG	346
ba1056	DEL	Chr2	14231171	14231438	GACATAGTGCACTGTGATGTGGAAGAGCAGGTGGCAATGTTCTTGCATGTAGTTGGTCACAACCAAAGGTTTAGGGTAATCAATTTATCGATTAGAAGGTCCTTTGAAACCATTAGCAGGCACTCTTAGGAGGTCCTTTATGCAGTTGGTAAGCTTAGACAGGAGATGATCCAACCTCCCTCAACTGGTGTTCATCCCAATATTGGGGGTAGCCGTTGGTGGAACCCATATTTTAAGGTTAGCATATAGAAATTAGTGTATAGGTGC	277
ba1057	DEL	Chr2	14272766	14273045	TCTTAGGTCTTGTTTAGTTGCCAAAGTTTGGAGGTGCCAAATTACTGTTACAGCACTGTAGCACACTGTAGCATTTCGTTTGTATTTGTGAATTATTGTCCAAACATTGACTAATTAGGCTTAAAAGATTCGTCTCGCAAAGTACAACAAAACTGTGCAATTAATTTTTAATTTCGTCTACATTTAGTACTCGTACCGTAAGTTTGATGTGATGGAAAATCTTCTTTTTACATAGTGTCAAAGTTGGGAGTTGGGGGTGAAGTAAACAAGGCCTTAACT	264
ba1069	DEL	Chr2	14614919	14615263	GGATCATTGGAATTGAATTCCATCCTAATAATCATAATTTAGACACAAATTAATTAAGCTAATATAATTGTATGTGGAATATAGTTGTATATTATAGTTGGTGACATGGGAGAGATACTTGTATGCTGCACTTCTACTATAGAGAAGCGAGTCTAAGAGCGTGCTATAAGAATTGAATTCCATCTAATAACCATAATCTATAGAATCAATTTCCATCTCCCACCCCATGAATTTAAGATAGGCTTATATCTAAACTTTGGAAAGTTGTGGAATGCCACATTCCAACATAAATTAGCCTACTCCATTAAATGATTCCAATTCCTTGGACCCAAACGGGGCCTAAA	352
ba1082	DEL	Chr2	14898556	14898738	AAATTGACAATCTCACAAGGATGAAATATCAGTAATTTTCTATTTACTGGTCGATCCCATCTTTTACGGAATCAATTCCTTTTTTGAATGTACAAAAATTTGAGGAGCTCAGCATGTCTGGAAGCACGGGAGAACGTTCTTTTGCTGATATTATTACCAGTACCGTCATCTTCAACGTCAGC	168
ba1084	DEL	Chr2	14968396	14968739	TGTTAAAGTTTAACACCTGTCACATCGGATGTTTGGATGCTAATTAGGAGTACTAAACATAAGCTAATTACAAAACTAATTGCACAGATGGAGTATAATTCGCGAGACGAATCTATTAAGCCTAATTAGTCCATGATTTGACAATGTGGTGCTACAGTAACCATTTGCTAATGATGGATTAATTAGGCTTAATAGATTCATCTCGCGAATTAGCACAAGGTTCTGCAATTAGTTTTATAATTAGCTCATGTTTAGTCCTCCTAATTAGCATCCAAACATCCGATGTGACACTGTTAAAGTTTAGCACCTCGTATCCAAACAGCCCCATAATAAAGAAGAAAAA	341
ba1102	DEL	Chr2	15255195	15255399	CCAGAGGGTAGTCGAACAGCTTCTAGGGGAGGTGCTCACCACCCTAAAGGTGACCCTGAATCTTCGCTCATCAATGGTGAATCTCAGGAATAAAATTAACAGTAACCGTGATGCACGCGACATCATCAACAATCAGCGTTGGGTGCATGAACTTGAAGAAGACTACAGGGGTGATAACAATGATCATTTTCCTACCTTTACAAA	188
ba1103	DEL	Chr2	15278443	15278788	CGTTTGGATCATTGGAATTGAATTCCATCCTAATAATCATAATTTAGACACAAATTAATTAAGCTAATATAATTGTATGTGGAATATAGTTGTATATTATAGTTGGTGATATGGGAGAGATACTTGTATGCTGCACTTCTACCATAGAGAAGCGAGTCTAAGAGCGTGCTATAAGAATTGAATTCCATTCTAATAACCATAATCTATAGAATCAATTTCCATCTCCCACCCCATGAATTTAAGATAGGCTTATATCTAAACTTTGGAAAGTTGTGGAATGCCACATTCCAACATAAATTAGCCTACTCCATTAAATAGATTCCAATTCCTTGGACCCAAACGGGG	349
ba1105	DEL	Chr2	15300699	15301242	TTAGGGCCTATATTCCGATGCCCCATCCTGCACTGGCTCTTGCCTGATAGGTTCAAACTTGGTGTCTCAGCGGCCTGTAATTGCTATTCTCGGAAACCTTTCCAAGTCTTTCGAAGAAAAACTTGCGAGCAAGGCTGAGTTGATACAGGCAAGATCATGGGCACCACTTGCAGCCACACAAAAGCATCTTGTCACGCTCACGGCTCACGCACCCAACCAATCAACTGGCCTGTTCGCTTCAGCTTATAAGCCGACTGAAAAGCTGAAATAGCTTATTTGTTGTGAGAGAAAAATACTGTTTGGTGGCTGATAAGCCGACCGAATAAGCTGAAGCGAACAGACCGACAACTCTCCCCATCCTATCCCAAGCCATATGTAAACCAATCAAACATGCCTTCA…	128
ba1108	DEL	Chr2	15349231	15349587	GGGTGTTTGGCACACAGGGGCTAAATTTTAGCCCCTGTCATATCGGATGTTTGAACACTAATTAGGAGTATTAAACATTGGTTAATTACAAAACTAATTGCACAACCTCTAGACTAAATCGCGAGACGAATCTATTAAGCCTAATTAGTCTATGATTTGACAATGTGGTGCTACAGTAACCATTCGCTAATGATGGATTAATTAGGCTTAATAGATTCGTCTCGCGATTTAGCCTAGAGGTTCTGCTATTAGTTTTGTAATTAGCTCATATTTAGTCATCCTAATTAGTATCCGAACATCCGATGTGACAGGGCTAAAGTTTAGCTCCTGTCTCCCAAACACCCCCGGTTACATAA	351
pD2342	DEL	Chr2	15442671	15442953	TGAAGGCCTTGTTTAGTTGGGGAATTTGGGAGGTGCCAAATTACTGTTACAGCACTGTAGCACACTGTAGCGTTTCGTTTGTATTTGTGAATTATTGTCCAAATATTGACTAATTAGGCTCAAAAGATTCGTCTCGCAAAGTACAACAAAACTGTGCAATTAGTTTTTAATTTCATCTACATTTAGTACTCCATGCATGTACCGCAAGTTTGATGTGATGGGGAATCTTCTTTTTGCATAGTGTCAAAGTTGGGAGTTGGGAGTAACTAAACATGGCCGAAG	277
ba1115	DEL	Chr2	15444621	15445127	GACTTTCTTTTCATCTTCTTTTTTTCCATTCCTCCCTCTCTCTCTCTCTCTCTCTCAACGCAGGGGAGGATTATTACAATCGCTTTCAGGAATTTGCAGAATCTTACATTAAACAAGGTTGGGTGTCACTCCTGTCCGGTCGCAGAATCTTGGCTCGGAGGAAGGGGCTGTTTGGATATGAGGTGCTAAACTTTAACAGTGTCACATCGGATGTTCGGATGCTAATTAGGAGGACTAAATATGAGCTAATTATAAAACTAATTGCAGAACCTTGTGCTAATTCGCGAGACGAATCTATTAAGCCTAATTAATCCATCATTAGCAAATGGTTACTGTAGCACCACATTGTCAATTGTACAAGACATGGGATTAATAGATTCGTCTCGCGAATTATACTCC…	366
ba1117	DEL	Chr2	15464366	15464902	ACTCTCCTTCATAGCTCACTGTGTTTTCCAGGACATGTTGGTTGAAAGGCCTCGACCAAAATCAAGTACCCTGGACAACAACAATGTGGCTACTGTGCCTGTGAAAGAAAGAGCTGGAATGTCTGCGAGAGAACGAGTTGTAAGGAAATGGGGAACGGACTGAAGTAGGTCACAGTAGTGTCTTGTGAGCTATCTGGCCTGTTCGCTTCAGCTTATTCAGCCGGCTTATCAGCCACCAAACAGTATTTTCCTCTCACAACAAATCAGCCGTTTCAGCTTTTCAGCCGGCTTATAAGCTGAAGCGAACAGGCCTGATCATCTTTGTTCAGATTTTTGCAGTCACCGTACCACCACTGTTTGTCATGTTCTTGTCAAGGTGGAAATCGTAGTTCTAATTAG…	131
ba1123	DEL	Chr2	15483043	15483349	ATTTCCAGGCCCAATGTCATTTGGAGTTGTACGCGCGCGCGAGAGGCCGGCCCAGCAAGGCTCCGCTAGGCTGTTGGCTGTGGCTTAGCGCTCGCTCGCGTATACTTCCTTCGTTCTATTTCACCTGACATGATGATCAAGAAATAACTCTACTTATCATCTAATTAATGCAAACAAATTTTTTTACATTAGTCCTCCAATGGTTGCCACGATGACTCCTCGTTGTTGATGCAATTTATTATCACGGTTCACATTGTTGGTAAATAGGACTCTTCATTTGTGAAAATCCGAATTTTAGAAAGGACG	319
ba1126	DEL	Chr2	15515952	15516474	GAATTAGACTCCATCTGTACAATTAGTTTTGTAATTAGACTATGGGGCTGTTTGGATATGAGGTGCTAAACTTTAACAGTGTCACATCGGATGTTCGGATGCTAATTAGGAGGACTAAATATGAGCTAATTATAAAACTAATTGCAGAACCTTGTGCTAATTCGCGAGACGAATCTATTAAGCCTAATTAATCCATCATTAGCAAATGGTTAATGCGCACCACATTGTCAAATCATGGATTAATTAGGCTTATAGGATTCGTCTCGCGAATTATACTCCATCCGTGCAATTAGTTTTGTAATTACCTTATGTTTAGTACTCCTAATTAGCATCCAAACATCCGATGTGACAGGTGTTAAACTTTAACAGGGGTTTCCCAAACACCCCCTATATTTAATA…	385
ba1128	DEL	Chr2	15590011	15590448	CTCCTCAGATTCCACTACTGTTAACAGAGCCAGAGATGCCTTAGGCCCTGTTTGGATACAAACTTCTAAAATTTAGTAGTGTACTAACCCTCAAATTGCTAGTCCTAAAGTTTAGTACAGGGCTGTTTGGATGGACTACTAATCTTTAGGACCTCAAAGGGAAAATGTTATTTTTACCCCCCAATTATTCCTCTAAACTACCCCTGCACTGTTCACGTCATTAATGCATGCAAGGGTAATAGGGGTAAAGGGGAACTTGGGACCACTTTTAGGAGAAATAGAATCCATTAGTACCCCTTGACCCTCCTAATTAAAATGGCCCTCCTAAAGTTTAGGAGTGCACTTTTAAGATCCATATTTGGATGCACAAGTCCTAAAAGTGTCTTAAAAGTGGATTCG…	379
pD2367	DEL	Chr2	15609288	15609639	TTTAGGGGCTGTTTGGATACGAGGTGCTAAACTTTAACAGTGTCACATCGGATGTTTGGATGCTAATTAGGAGGACTAAACATGAGCTAATTATAAACCTAATGCACAACGTACGGTAATTCGCGAGACGAATCTATTAAGCCTAATTAATCCATCATTAGCAAATGGTTACTGTAGCACCACATTGTCAAATCATGGACTAATTAGGCTTAATAGATTCGTCTCGCGAATTATACTCCGTCTGTGCAATTAGTTTTGTAATTAGCTTATGTTTAGTACTCCTAATTAGCATCCAAACATCCGATGTGACAGGTGTTAAACTTTAACAGGTGTTTCCCAAACACCCCCTTA	347
ba1134	DEL	Chr2	15810647	15810879	GGCTATAGCGAGGCTATAGCGGCGCTATAGCGTTTGATGCTAACTGCCGCTACAACACTGTTGTACTAATTAGCGGGCTATAGCGAGGCTATAGCGGCGCTATAGCGTTTGATGCTAACTGCCTCTACAACACTGTTGTACTAATTAGCGGGCTATAGCGGCGCTATAGCGGGCTATAGCGGTTGAGCACAGCTCTACGCTAAATCTCATAGCCCGCTATTTTGTACATTGA	258
ba1142	DEL	Chr2	16135229	16135662	TTTAGGTATTAGGCCCCGTTTGGAGAACATCAGATTCTCAAAATCCAAAATCCAGAATCTGGATTGCCCTCTAAACATGACAGATTCTGACCCAGATTCTACAGTCTAGATTTTGGATTTTGAGAATCCTAGAAGCTGCTCAAAAGTTGATTCTACCAGATTTTGCATGCATATTTTACCATTTTGCCCAGCAACCTTCTAGATAATTATTCAATCTGCCATTGTCCACTCTTTTGGGTAGCAGGGGCATAAAAGACATCTATTCAACAAACTACCATACAATCAGATTTTGGAATCTATGATCCAAACAACATCGTCCAGATTTTGCTTAGAATCTAGATTCTGAAAATCCATCTAAAATCTAGATTTTCAAAATTCACAACTGGATCCAAACGGGCC…	395
ba1143	DEL	Chr2	16136065	16136192	GATTATTTTCAATCTATTCTACTCATATATGAAAGTGGAAGGCTTATGTGGAGCTTGGTAGGTAGAAACAATCCTAACAAAATATTATATATGAAATATTTTCAAACTAAGAGAGAGATCTATTGTG	109
ba1144	DEL	Chr2	16194058	16194414	ATTAAGGTCCCGTTTGGGTCCAAGGAATTGGAATCTATTTAATGGAGTAGGCTAATTTATGTTGGAATGTGGCATTCTACAACTTTCCAAAGTTTAGATATAAGCCTATCTTAAATTCATGGGGTGGGAGATGGAAATTGATTCTATAGATTATGGTTATTAGAATGGAATTCAATTCTTATAGCACGCTTTTAGATTCGCTTCTCTATAGTAGAAGTGCAGCATACAAGTATCTCTCCCATATCACCAACTATAATATGCAACTATATTCCACATACAATTATATTAGCTTAATTAATTTGTGTCTAAATTATGATTATTAGGATGGAATTCAATTCCAATGATCCAAACGGGGC	360
ba1156	DEL	Chr2	16525241	16525501	GAAACCCCTGTTAAAGTTTAACACCTGTCACATCGGATGTTTGGATGCTAATTAGGAGTACTAAACATAAGCTAATTACAAAACTAATTGCACAGATGGAGTATAATTCGCGAGACGAATCTATTAAGCCTAATTAGTCCATGATTTGACAATGTGGTGCTACAGTAACCATTTGCTAATGATGGATTAATTAGGCTTAATAGATTCGTCTCGCGAATTAGCACAAGGTTCTGCAATTAGTTTTATAATTAGCTCATATT	341
ba1161	DEL	Chr2	16649964	16650296	TAAACTTTAGCCCTGTCACATCACACGTTCAGATGCTAATTAGGAGGACTAAATATGAGCTAATTAAAAAACTAATAGCAGAACCCATAGGCTAAATCGCGAGACGAATCTATTAAGCCTAATTAATCCATCATTAGCGAATGGTTACTGTAGCACCACATTGTCAAATCATGGACTAATTAGGCTTAATAGATTCGTCTCGCGATTTAGCCTAGGGGTTGTGCAATTAGTTTTGTAATTAGACTATGTTTAATACTCCTAATTAGTGTCCAAACATCCGATGTGACAGGGGCTAAAATTTAGCCCCTCCCTGCCAAACACCCCCTAAACAA	351
ba1170	DEL	Chr2	16887896	16888100	TTGCTAAACTTTAGCACCCGTCACATCGAATGTTTAGATACTAATTAGGAGTATTAAACGTAGACTATTTACAAACCCATTACATAGACGAATCTAAAAGACGAAATCTATTAAGCCCTAATTAGTCCATGATTTGACAATGTGTTGCTACAGTAAATATTTGCTAATGATGGGTTAATTAGGCTTAATTAGGCTTAATAGATT	352
ba1172	DEL	Chr2	16891323	16891588	CAACTTCAAACCATCCTTACACAGAAGGGATCCGCTAATAAGATTTTTATTTATTGAGGGGACATGCTACACGTTCTTCCGCGCGGTCTTTCTCGAAGTAAACTTCAGATTGATCGTACCAACACCATGAACAGCAGCACCTCAACCATTCCCCATCAACATGGATCCAATCCCTATGACTTGGTAAGAAGAAAACAAAGAAATATCAGCACACATATGTATATATATTAGCTCCGGTGTCAATCCACTAATTTGGTAAATAACA	279
ba1178	DEL	Chr2	17253649	17253984	TTGGATACGAGGTGCTAAACTTTAACAGTGTCACATCGGATGTTTGGATGCTAATTAGGAGGACTAAACATGAGCTAATTATAAAACTAATTGCAGAACCTTGTGCTAATTCGCGAGACGAATCTATTAAGCCTAATTAATCCATCATTAGCAAATGGTTACTGTAGCACCACATTGTCAAATCATGGACTAATTAGGCTTAATAGATTCGTCTCGCGAATTATACTCCATCTGTGCAATTAGTTTTGTAATTAGCTTATGTTTAGTACTCCTAATTAGCATCCAAACATCCGATGTGACAGGTGTTAAACTTTAACAGGTGTTTCCCAAACACC	342
ba1179	DEL	Chr2	17313828	17314303	TAATGTATGCTGCTGACTGCTGTGCTCACCGCTCAGGGTTGCCACGAAGAATTCTTAGCCATGGAACCAACGGACCAGTGGAGCAGGCTACCGTTGGTGTAGCTATGGACTTTCAGACGCACTCGTTCTTCGGGGGTGTTTGGAACACCCCTGTTAAAGTTTAACACCTATCACATCGGATGTTTGGATGCTAATTAGGAGTACTAAATATAAGCTAATTATAAAACTAATTGCACAGATGGAGTATAATTCGCGAGACGAATCTATTAAGCCTAATTAGTCCATGATTTGACAATGTGGTGCTACAGTAACCATTTGCTAATGATGGATTAATTAGGCTTAATAGATTCATCTCGCGAATTAGCACAAGGTTCTGCAATTAGTTTTATAATTAGCTTA…	353
ba1183	DEL	Chr2	18765104	18765321	CAATCTCGACACCTTTCTCATGCACTACAAAGCTCAAGAATTTTCCAACCGATACACCAAAAGCACATTTGAGTGGATTCATCTTCAAACCATACCAATGCATCCTCTCTAATGCAAGTCTCAAATCAGCCAAATGGGGTTCTGGCCCGGCTGATTTTACAATGATGTCGTCGATATATACTTCCACACTACTCCAAGCAAATCATGAAAAATCAAA	176
pD2502	DEL	Chr2	19718540	19718706	ATGCCGAATTTGGGAAATCTAATTTTGCCGAAAACGGCAAAGGGGTTGAATTTCATGTGTAACTTTTTCTGTAGATCAATTTTCATATAAAATTCGCCCCGACCCGAGATCGTACCGAAAAGTTACGGCTGATTTACCGAAGCATACGCAAACGGCAAAAATCCCG	165
ba1200	DEL	Chr2	20490801	20491148	AGGTGCTAAACTTTAACAGTGTCACATCGGATGTTCGGATGCTAATTAGGAGGACTAAACATGAGCTAATTATAAAACTAATTGCAGAACCCTGTCCTAATTCGCGAGACGAATCTATTAAGCCTAATTAATTCATCATTAGCAAATGGTTACTGTAGCACCACACTGTCAAATCATGGACTAATTAGGCTTAATAGATTCGTCTCGCGAATTATACTCCATCTGTGCAATTAGTTTTGTAATTAGCCTATGTTTAATACTCCTAATTAGCATCTAAACATCCGATGTGACAGGTGTTAAACTTTAACAGGGTGTTGCCAAACACCCCCTTAATAATAGGTATAGAT	337
ba1207	DEL	Chr2	21795046	21795428	ATGTTCAGGTTCTGCTAACTTTTCACTCGGGCCCCGTTTGGATCATTGGAATTGAATTCCATCCTAATAATCATAATTTAGACACAAATTAATTAAGCTAATATAATTGTATGTGGAATATAGTTGTATATTATAGTTGGTGATATGGGAGAGATACTTGTATGCTGCACTTCTACTATAGAGAAGCGAGTCTAAGAGCGTGCTATAAGAATTGAATTCCATCTAATAACCATAATCTATAGAATCAATTTCCATCTCCCACCCCATGAATTTAAGATAGGCTTATATCTAAACTTTGGAAAGTTGTGGAATGCCACATTCCAACATAAATTAGCCTACTCCGTTAAATAGATTCCAATTCCTTGGACCCAAACGGGGCCTC	349
ba1209	DEL	Chr2	22073783	22074101	AGTTTAACACCTGTCACATCGGATGTTTGGATGCTAATTAGGAGTATTAAACATAGGTTAATTACAAAACTAATTGCACAGATGGAGTGTAATTCACGAGACGAATCTATTAAGCCTAATTAGTCCATGATTTGACAATATGGTGCTACAGTAACCAATTGCTAATGATGGATTAATTAGGCTTAATAGATTCGTCTCGCGAATTAGCACAGGGTTCTGCAATTAGTTTTATAATTACCTCATGTTTAGTTCTCCTAATTAGCATCCGAACATCCGATGTGACACTGTTAAAGTTTAACACCTCGTATCCAAACACCC	348
ba1210	DEL	Chr2	22126186	22126319	AAGGCCACCTTTTTGCTTTTGCCCATGCGACGCGCAGCACTCATTCACACGCTGACCGGTGGGCCCCCAGCCCGGGAGATTATTAGTTTAGCTGCAGGCTGGCCCGCTGGCGATTGATGCATCAGGGGCATGT	137
ba1217	DEL	Chr2	22715680	22716030	ATTTTGGGCCTGTTTTCTTCCACTTGCTAAACTTTAGCACCCGTCACATCAAATGTTTAGATACTAATTAGAAGTATTAAACGTAGACTATTTACAAAACCCATTACATAAGACGAATCTAAACGGCGAGACGAATCTATTAAGCCTAATTAGTCCATGATTTGACAATGTGTTGCTACAGTAAATATTTGCTAATGATAGATTAATTAGGCTTAATAGATTCGTCTCGCTGTTTAGATTCCACCTATGTAATTGGTTTTGTACATAGTCTACGTTTACTACTCCTAATTAGTATCTAAACATTCGATGTGACACGTGCTAAAAATAAGACACGGGAAGAAAACGCCCCC	350
ba1229	DEL	Chr2	24319981	24320136	AAGAAATTCATCAGCCTTCTTATTTTTCTCCAAAAAAGCACAAATGCATATTAGATTAGGGTTCAATGACATGGAAGTCAAGAACTACAGCATATATACACTTTACAGGCCAAACAATGCTGAACAGCTTGCAGCACTTATATAAAAGAATAATA	172
ba1242	DEL	Chr2	24654515	24654819	TTGATTTTTTTCATTGTACTTGTCCTCAAACAGCTATCTTACTTTGATTTCTTTTTCTTTTAATTTTCTTTGTGTGCCATGCATTTGTATTAACATGCATTTGTATTAACTATTAACGCACGACCCTAACAAAATCAGGATACTTACTTTGAAGAGCTATTAGCTCCTTGAGAGTCGAGCCTAGCCTCGGTAGAGCATTGCCACAAAACGGAAGCGGGGGATTGGCAGGTTTGCGCGTGTACTCCAAGTCAATCAGAATAGGATTACTGTTCTCTTGATTCACATGTTCTTACTACTTGAACCC	292
ba1254	DEL	Chr2	24839600	24840027	GGGGGGCGTTTGGATCTTTAATCCTGACTAAAATTTATGTCACATCGAATATTCGGAGGCTAATTAGGAGGATTAAACATGAGCTAATTATCAAACTAATTACACAGATGGAGGCTAATTCACGAGACGAATCTATTAAGCCTAATTAATTCATCATTAGCACATGTTTACTGTAGCATCACATTGTCAAATCATGGACTAATTAGACTTAATAGATTCGTCTCGCAAATTAGTCTCCGTCCATATAATTAGTTTTGTAGTTAGCCTATATTTAATACTCCTAATTAGTATCTAAACATTCGATGTGACAGGAATTTTAGGAGTTGCTAAAGAAACAAACACCCCCTTAGAGAACCTTGTTTTAGCACCCGTTCGTTCCAAAACCTCTTTAGTCTTGGT…	357
ba1286	DEL	Chr2	25336312	25336711	ATCTATTTTTTCATTAGCGGCGGCCTTGGGTGGCACATCCGTCGGAGGAGATTTGGTTTCAGGGCGTGGAGGGGCAATAGTAGCCTCACGTTGTGTTTCTTTTGGTGGAGACTTACCCTTAACTTCAGGGTGCTGAGATGAGGCCAGGGACAAATCCTCGTCCAGAAAACCCTCGTATTCGTCTTCGTCCACGGCTTTGACAATCCTAGACCCCCCCCCCAACTAGCAATGTCACTACTAACTTCCCAGTCTTTTTCCTAGCCTTCTTCACCTTCATACCAGCAAGAGCGCTGGCAGCCTTGAGTTCAGGTCTTGTAACCACTGGCCTAGCACGGGATTGTGAGTTGCAAGCGCAGGGTTCTTAACAACCAGATCACCAGAGCTTTGGCTGAGCATGCC	364
ba1287	DEL	Chr2	25343564	25343717	AGTTGGCCTGTTCGTTTCAGCTTATTCAGCCGGCTTATCAGCCACTCAGCTTATTCAGCCGGCTTATCAGCCACCAAACAGTGTTTTTCTCTCACAACAAATCAGCCGTTTCATCTTTTCAGCCGGCTTATAAGCTGAAGCGAACAGGACTAG	175
ba1288	DEL	Chr2	25385865	25386254	TGGCACTATGCAAAAAGAAGACTCCCCATCACATCAAACTTGCGGTACATGTATGGAGTACTAAATGTAGATGAAATCAAAAACTAATTGCACAGTTTTGTTGTACTTTGCGATACGAATCTTTTGAGCCTAATTAGTCAATGTTTGGATAATAATTCACAAATACAAACGAAATGCTACAGTTGCGCATTTATGCAAAATTCCAACTTTGGCACTTCCAAATTAGGAACTAAACAAGGCCTTAGTTTCTGCTATTTTCGAATTGTGCTTCAAGACGAGTAGGAAACTAAAAGCCCTACTTTATTAGTTTCTGCTATTTTCGAATTGTGCTTCAAGACGAGTAGGAAACTAAAAGCCCTACTTTATGTATGCAGACTTGCAGCGGACTG	335
pD2718	DEL	Chr2	25508665	25508893	GAGCATAACTTGGGTGGTTTGGATCGGACCGAGGATATTTGCCCAACTTATCTAGGTTTAATCCATGCAATTTCAATCTAGGTGTTTCACCTCTAGTAGGTCCCATCATGGCTGGGTATTTAATTTGTCAAACAAAAAAAGTTAGGGGGGGGGGTGTTCCTTCTTCGTTGTTCTTAAAAATAGTTATATTATATATGCTGAGTATACATGTTTTTCTACTCCCTCTGT	227
ba1293	DEL	Chr2	25545808	25546125	ATGAATAACACTGTCATATCGAATGTTCGGATACTAATTAGGAGGACTAAACATGAGCTAACTATAAAATTAATTGTAGAACCCTGTGCTAATTCGGGAGATGAATCTTTAAGCCTAATTAATCCGTCATTAGCAATGGTTACTGTAGTACCACATTGTCAAATCATGGACTAATTAGGCTTAATAGATTTGTCTCGCAAATTAGACTCCATCTGTGCAATTAGTTTTGTAACTAACCTATATTTAACACTCCTAATTAGCATCCAAACATCCGATGTGATAGATACTAAACTTTAGTGGGGTGTATCCAAACACCC	316
ba1294	DEL	Chr2	25548590	25548797	AATTTGAAGTGTCAAAATTACTGTGCCAGTACTGTAGCATATTGTAGCGTTTCGTTTGTATGTATAAATTATTGTCCAAACATTGACTAATTAGGCTCAAAAGATTCGTCTCACAAAGTACAACAAAACTGTGCAATTAGTTTTTAATTTCGTCTACATTTAGTACTTCATGCATGTACCGCAAGTTTGATGTGATAGGAAATCTTC	265
ba1295	DEL	Chr2	25585186	25585595	GTGTGGAGGAGGGGGCTGCCAGTGCCATCGTTGGCAGTGTCGGTTTTTCGTCGACGGTCACTAAGGGGGTGTTTGAATAGCAGGGGCTAAAGTTTAGCCCTGTCACATCGGATGTTCGGATGCGTAATTAGGAGAACTAAACATGAGCTAATTATAAAACTAATAGCAGAACCCCTAGGCTAAATCGCAAGACGAATCTATTAAGCCTAATTAATCCATCATTAGCGAATGGTTACTGTAGCACCACATTGTCAAATCATGGACTAATTAGGCTTAATAGATTCGTCTCGCGATTTAGCCTAGGGATTGTGCAATTAGTTTTGTAATTAGTCTATATTTAATACTCTTAATTAGTGTCCAAACATCCGATGTGACAGGGGCTAAAATTTAGCCCATGCC…	353
ba1296	DEL	Chr2	25586124	25586463	TCCTGAAACTAAAATTTAGTCCGTGTCACATCGAATATTCGGATGCTAATTAGGAGGACTAAATATGAGCTAATTACAAAACTAATTGCAGAACCCCTAGGCTAAATCGTGAGACGAATCTATTAAGCCTAATTAATCCATCATTAGCAAATATTTACTGTAGCACCATATTGTCAAATCATGGACTAATTAGGCTTAATAGATTCATCTCGTGATTTAGCCTAGGGTTTGTGAAATTGGTTTTGTAATTAGCCTATATTTAATACTCCTAATTAGTGTCCAAATATTCGATGTGACAAGGGCTAAAATTTAGCCCGGGGATCCAAACACCCCCATAGT	346
ba1298	DEL	Chr2	25596416	25596549	ATCTTGAAAAGACTAATCTGCTGGAGCTGTTGTTGCTATAATTCTCAGCAAATGACTGTTGTTGGAGATTGTTCTTGTAGCTAGACGTGCCATTTCCCAGAGGAATTTTGTTGGCACCCAAGAGAGGTGGATA	157
ba1299	DEL	Chr2	25602612	25602977	GGCAATGCCGACGGCAGAAGAGTTCAAGGCCAATTTTGCTGTTATCACTACCGGAAACCGAGCTAATTGTTTTTCCATTTGGCGAGTGCAAACTGTCGCGCACTTGGCAAAATGCATATTTGCCGAGTGTATCAAAATAAACACTTGGCATTAAAAAACACTCGGCAAAACACACATTTGCCGAGTGCAAAAAAAAACCACTCGGCAACTCGACTATTACACTCGGCAAAACGCCATACTCGGCAAAGCTATATCACGTGACAAGCACGCGCAGCCGCCGTTACGCTGCGGGGCCGCCGTTTGTACTTTGCCGAGTGCCCGTTAGCGGCACTCGGCGAACCGTTGCTTTGCTGTTATATATGTTG	315
ba1302	DEL	Chr2	25627552	25627813	CCAAGTTGGGAAGTGCCAAATTGGCATTTTGCCATAAATGCGACACTGTAACGTTTCGTTTGTATTTGTGAATTATTGTCCAAATATTGACTAATTAGGCTCAAAAGATTCGTCTCGCAAAGTACAATAAAACTGTGCAATTAGTTTTTGATTTCGTCTACATTTAGTACTCCATGCATGTACCGCAAGTTTGATGTGATTGGAAATCTTCTTTTTGCATAGTGTCAAAGTTGGGAGTTTGGAGGGAAGTAAACAAGGGGT	281
ba1304	DEL	Chr2	25692166	25692432	TTTGGGTGTCCAAAATTACTGTTGTAGCATTGTAGCACACTGTAGCGTTTCGTTTGTATTTGTGAATTATTGTCCAAATATTGACTAATTAGGCTCAAAAGATTCGTCTCGCAAAGTACAACAAAACTGTGCAATTAGTTTTTGATTTCGTCTACATTTAGTACTCCATGCATGTAGCGCAAGTTTGATGTGACGGGGAATCTTCTTTTTGCATAGTGTCAAAATTGGGAGTTTGGGTGGAACTAAACAAGGCCTGGGATGTACTA	272
ba1308	DEL	Chr2	25764995	25765336	CGTATAGCAACAAAATCAGGACCCAAGTGGGGCCATGCATGCCCCCCTCACGCTCGACGTGCACCACATATACTTGCTATGTTAAGTTGATTATTAGGAGGTCTAAATATTTTGACACCTTTTGTATTACTACGATGAGTATTCATCCTTAACGTCAGTACCGGATGGTTTTTCATCAGTACCCTAACGTGCGAAATTAGTACTGGATAGAAATTTTCGGTCCTTGGAGACCTTTTAGTACCCGCCAATAACACCAACCGGTACTAAATGTCACCATTTTTTTCAACTGTTCGTTTGCGGGGACCTCCCGTCTGTTCGTCAATTTTTTTCTTTATTTTTTG	335
ba1309	DEL	Chr2	25766465	25766970	TTGTGGTAAGAAAACAATATTTGAATCGCGCAAATCCGTTTCATATGTAATTTAATACGGTGAGACAGACCTGTATCTCTCTACTCCTCTCTGTTCCTCTCCGTTTGTCCGGAACATATGCATGCCTCCCCCCCCCCCCCAAACACACACACACACACCAAATGACCTCGAAATGTCTGGTAGTCCTTGCAACTCATCCTATCATCGTATCGCTTTCTGACGCGGAACGCATTCTCTTCTCCCTCTCCTTGCATTGTGGGGGCATCCGCAAACGGACATGCGACAGTCGCGATCGCACGTCCACGTCCTCCTGCGAACGAACGGACATGGCAGCGTCACGTCTGGTCTGAACAAAATCCGGTGAACGGCTCAGAGCATATTGCCGAGGCTAACCGCTTG…	360
ba1313	DEL	Chr2	25835930	25836221	AGCTGCTAGTACTATAAGGCCTTATTTAGTTCCTTCAAAATCCCAACTTTGGCACTATGCAAAAAGAAGATTCCCCATCACATCAAACTTGCGGTACATACATGAAGTACTAAATGTAGACGAAATTAAAAAACTAATTGTACAGTTTTGTTGTACTTTGCGAGACGAATCTTTTGAGCCTAATTAGTCAATGTTTGAACAATAATTCACAAATACAAACGAAATGCTACAGTTGCGCATTTATGGTAAAATCCCAACTTTGGCACTCCCAAATTGGGAACTAAACAAGGC	278
ba1314	DEL	Chr2	25837192	25837450	GGGAGATGCAAAATTACTGTGCTAGCGCTGTAGCACACTGTAGCGTTTCGTTTGTATTTGTGAATTATTATCCAAATATTGACTAATTAGGCTCAAAAGATTCGTCTCGCAAAGTACAATAAAATTGTGCAATTAGTTTTTAATTTCGTTTACATTTAGTACTCCATGCATGTACCGCAAGTTTGATGTGATGTGAAACCTTCTTTTTGCATAGTGTCAAAGTTGGAAGTTGGGAGATAACTAAACATGGCCTTTGCC	241
ba1320	INS	Chr2	25992941	25992962	GATTCGATGCTTAATTAACTA	188
ba1321	DEL	Chr2	26017781	26017964	ATTTTTCATGAAGGGTGGACCTAGCACTCATATTGAAGAACAAGTCGGAGGTGATGAAGTTGAAGCGGAAGAAGATGTGCAGAGTAATGTGGGTGGAAACGAAGAGCTTAACTACGAAGAACAAGAAGGTGGAGATGCAGAACATGATGTAGCATCTCGGGAACCAAATGGAGAGGCTGATGA	118
ba1334	DEL	Chr2	26173613	26174098	GTAGCCTCTAGGAGTCTGCATAATTTTTTTTTTATAAAGGAGTTCATTCAACATTAAAAGCAATGTACACGGTGAAAGGTCAGAAGACCCCAAGTTACAGACTGGAGCGCTGCCAGAATAGCACATCCATGACCATGGTGAAGATTGGAACAGACATTAAGAAGTAGCCCATCAGAAGCAAGAGATCTAGCTGAAACTGCTAGTTGATGTGCTGCCTGATTCTGAACGCTAGAGATTTTAGTCACTTGCAAGATTGGAACAGACATTAAGAAGTAGCCCATCAGAAGCAAGAGATCTAGCTGAAACTGCTAGTTGATGTGCTGCCTGATTCTGAACGCTAGAGATTTTAGTCACTTGCAAACCATCGTGTAAGCCAAGCTCCTGAAAGTGAGAGATCCA…	118
ba1336	DEL	Chr2	26205224	26205572	GGAGTTTCATAGAGATTTCATGCACATTAAATACGGTGCCACATAAGCATATGTGATGACATGGCATGGTAGTTATGAAGGGAAGGAGTTTCATCAGGATGAAAAACTGTGTATACACTGTTTCCAAGACTATGAAACCTATTGAAACTTGCATTGGGAGCTATAGAGTTTCATTTCATCTAACCATATCCAATCACATGCCTCACAATTAAATGTCATGGGCATCCTATGAAATCGTGAAATGAAACTGTGCATTGGGACTCCCTGTTTCATTCATGAGAATACACCTCATGGGATGATGTGGCATCCTTGGAAACAGTGCAATGAAATCTTGCACCGGGACTAGTC	359
ba1350	DEL	Chr2	26327929	26328273	GCTGTTTGGATACGAGGTGCTAAACTTTAACAGTGTCACATCGGATGTTCGGATGCTAATTAGGAGGATTAAACATGAGCTAATTATAAAACTAATTGCAGAACCCTGTGCTAATTCGCGAGACGAATCTATTAAGCCTAATTAATCCATCATTAGCAAATGGTTACTGTAGCACCACATTGTCAAATCATGGACTAATTAGGCTTAATAGATTCGTCTCGCGAATTATACTCCATCTGTGCAATTAGTTTTGTAATTAGCTTATGTTTAGTACTCCTAATTAGCATCCAAACATCCGATGTGACAGGTGTTAAACTTTAACAGGTGTTTCCCAAACACCCCCT	359
ba1354	DEL	Chr2	26389793	26390188	TCACTTGCTTAAATTTAAGCACCCGTCACATCGAATGTTTAGATACTAATTAGGAGTATTAAACGTAGACTATTTACAAAACTGATTACATAAGTGGAGGCTAAACGGCGAGACCAATCTAATAACCCTAAGTAGTCCATGATTAGACGATGTGTGGAACACGAAAGATGAGCTAGAAGCTTCAGTAAATCGCGCAGAAGCTATTCGTCTCGCTGTTTAGCCTCCACTTATGTAATGAATTTTGTAAATAGTCTACGTTTAATACTCCTAATTAGTACCTAAACATTGATGTGACACTTGCTTAAAAATAAGCAAAGGGAACCAAACGGGCCCTAACTTTTCGGTCAGGTGAGAGAGACGACCACTGCTGCGCTTTTGCCGACGTGGAGGTTGTC	353
ba1360	DEL	Chr2	26510243	26510402	GCCTCACCACGCGCTCCATCTACTTCTACAGCGGTGAAGGGAGAGTGACCTCCATGGACTTGAGCACTGCCGGCCGAGTTATCATCGTTCGTGTTACCCCACAACATTGAGGACTGGGATGGCGGCGATGGCCATATGAGCTGGTGCAGCATGACGGTC	167
ba1365	DEL	Chr2	26615163	26615484	CTCCTAAAATTCCTGTCACATCGAATGTTTAGATACTAATTAGGAGTATTAAACATAGTCTAATTATAAAACAATTGCACAGATGGAGACTAATTTGCGAGACGAATCTATTAAGCCTAATTAGTCTATGATTTGACAATATAGTGCTATAGTAAATATGTGCTAATGATGGATTAATTAGGCTTAATAGATTCGTCTCGTGAATTAGCCTCCATCTGTGTAATTAGTTTTATAATTAGATCATGTTTAATCCTCCTAATTAACGTCCGAATATTTGATGTGATATGAATTTTAGTCCGGACTAATGAACCAAACACCCCC	344
ba1380	DEL	Chr2	26820100	26820321	AACAGCTTCTCAATGACAATATATGTAATTTTATGATCACTTAATGCTTGGAGAGAGAGGAGAAGCCGGTGAAGCCACTTTTTTCGGCTTCTCCTCTCTAGTGTAAGCCGTTTTGCGGCTTCTCCTCGGCTTTGGTGGTGAAGCTGTTTTGAAATTGACCCTTTGGTAGAGCTTCATCAAAAACCGGTGGAGAAGCACTTTGAGAAGCCCTATCAAACGGG	334
ba1386	DEL	Chr2	26986751	26987024	GAGGGAGGTGTCGGAGGTGGAGGTGATGAAATCGAGCTGTTGAAGGAAGGAGGCGAACTGCTGATACCACACCCTCGGGGCCTGCTTCAGTCCATACAAGGACTTCTGCTGGAGACAGACGTAATCGGGGGCGGTGGGGTCGACGAAGCCGGGAGGCTGGTGGCAGTAGACGGTCTCCGCAAGGTGTTCGTGAAGAAAGGCATTCTTCACGTCCAGCTGGTGGATCGGCCAGGCGCGAGAGGTGGCGATGCTGAGGACGATCTGTATCATCGC	250
ba1388	DEL	Chr2	27130217	27130347	GGCCGTTTTGACTTTTCTAGATACATAGATATTATTATGTATCTAGACATAGGGTATATCTAAGTACATAACAAAGTCTATGAATCTAATAAAGTCAAAACGACCTATAATTTGGAACGGAGGGAGTACA	151
ba1391	DEL	Chr2	27152860	27153015	TCCAAATTATAGGTCGTTTTGACTTTATTAGATTCATAGACTTTGTTATGCACTTAGATATACCCTATGTCTAGATACATTATAATATCTATGTATCTAGAAAAGTCAAAACGACCTATAATTTGGAACGGAGGGAGTATATATAAGAAGGTACC	152
ba1394	DEL	Chr2	27183377	27183624	CGGCGCCGTGTCCGTTATAGTAAACGACAACTCTCGTTAGAGTATGCTAAATTACATCCTCAGTTGCTATTTTCGTACTTCTATATCTTCGATGCCGCCTGTACGAACAACTGGTACCAACGTACGTCGTTGCTGTTGAGGCGAGCAAAGGGGCAGGATTGAATTGGTCATAGCATCATCATCATGGGCAACTGGCCTTTAAAAACTCTCTGACTAATCTGACTTGATTATCTATGTAACAGCATTT	271
ba1398	DEL	Chr2	27340095	27340457	GGGGCTGTTTGGATACGAGGTGCTAAACTTTAACAGTGTCACATCGGATGTTCGGATGCTAATTAGGAGGACTAAACATGAGCTAATTATAAAACTAATTGCAGAACCTTGTGCTAATTCGCGAGACGAATCTATTGAGCCTAATTAATCCATCATTAGCAAATGGTTACTGTAGCACCACATTGTCAAATCATGGACTAATTAGGCTTAATAGATTCGTCTCGCGAATTATACTCCATCTGTGCAATTAGTTTTGTAATTAGCTTATGTTTAGTACTCCTAATTAGCATCCAAACATTCGATGTGATAGGTGTTAAACTTTAACGGGTGTTTCCCAAACACCCCCTCAATCAAAAAAGTTT	351
ba1402	DEL	Chr2	27823308	27823502	TTCTCCCGTGGTTGTTACGGTCCGGTGGCGCCTTTCTGCGCGTCGATCGTCCCCCGTCTTCTCCCGTGGTTGTTACGGTCCGGTGGCGCCTTTCTATTGGTCTAGACGACTTTTAGACGACGCACACATCTTATGCAACCACACATCCACAAGAAGTCACCAATACGTCGAAATCCATGAAGCTATGCCATCAC	120
ba1407	DEL	Chr2	27980332	27980587	GGAATTTGGGAGGTGCCAAATTACTGTTACAGCACTGTAGCACACTGTAGCGTTTCGTTTGTATTTGTAAATTATTGTCCAAATATTGACTAATTAGGCTCAAAAGATTCGTCTCGCAAAGTACAACAAAACTGTGCAATTAGTTTTTAATTTCATCTACATTTAGTACTCCATGTATGTACCGCAAGTTTGATGTGATGGGGAATCTTCTTTTTGCATAGTGTCAAAGTTGGGAGTTGGGAGTAACTAAACATG	281
ba1408	DEL	Chr2	28205935	28206271	GGCTTCTCATAAAACGGCTTCGGCTTCGACTTTTTCGGTGGAGTGGCTTTTTTAGTCAAGCTGAAGCCGTTGCAAAACATTTGGTAAAACGGCTTCTCAATGGCAATATATGTAATTTTATGATCACTTAATGCTTGGAGAGGGAGGAGAAGCCGGTGAAGCCACTTTTTTCGGCTTCTCCTCTCTAGTGTAAGCCGTTTTGCGGCTTCTCCCCGGCTTTGGTGGTGAAGCCGTTTTGAAATTGACCCTTTGGTAGGGCTTCACCAAAAGCCGGTGGAGAAGCACTTTGAGAAGCCCTACCAAACGGGGCCTTAATGTACAATAATCAGGCATTCT	334
ba1411	DEL	Chr2	28228356	28228529	GGCGAATGCGTGGGCAGGTTTTCATCTTCCCTACTCCATTTAGAAACTGAGAGCCTGTTCGCTTCAGCTTATAAGCCGGCTGAAAAGTCGAAACGGCTGATTTGTTATGAGAGGAAAACATTGTTTGATGACTGATAAGCCGGCTGAATAAGCTGAAGCGAACAGGCCCTGAA	120
ba1418	DEL	Chr2	28384305	28384661	TGTAGGTTAAGGGGGTGTTTGGATAGCAGGTGCTAAACTTTAGCAGTGTCACATCGGATATTCGGATGCTAATTAGGAGGACTAAACACGAGCTAATTATAAAACTAATTGCACAGATGAAGTCTAATTTGCGAGACGAATCTATTAAACCTAATTAATTTATCATTAGCAAATGGTTACTGTAGCACCACATTATCAAATTATGGACTAATTAGGCTTAATAGATTCATCTCGCGAATTAGACTCTATCTGTGCAATTAGTTTTGTAATTAGCCTATGTTTAATACTCCTAATTAGTATCCAAACATCCGATGTGACGGGTGCTAAACTTTAGCACCTTGGAGCCAAACAGCCCC	346
ba1420	DEL	Chr2	28472104	28472361	CCCAACTTCCAACTTTGACACTATGCAAAAAGAAGATTCCCCATCACATCAAACTTGCGGTACATGTATGGAGTACTAAATGTAGATGAAATTAAAAAGTAATTGTACAGTTTTGTTGTACTTTACGAGACGAATCTTTTGAGCCTAATTAGTTAATATTTGGACAATAATTCACAAATACAAACGAAACGCTACAGTGTGCTACAGTGCTGTAACAGTAATTTGGCACCTCCCAAATTGGCCAACTAAACAAGGCC	274
ba1421	DEL	Chr2	28493847	28494230	TTTCATGTGACGAAAGAGTTGTTGCCTTGATCATCCCTACAAATAGCCCAAGAATCTACATGGAAATCATGATTCTCATGACCTGGTCAATCTGGACAGTAAGAAACGATTGGTTGTTCAAAGGAATTGACCCAACAGTCCAACAATGCAAGAGGAAATTCATCTTCGAGTTTTCTACCCTCTTGCACAAAGCAAGACCAACAATGGTTCCCAATATGACAGTTTGGATACAATCCTTATAATAGCTCTTAGCCTCTCATCTTTGGTTAGAAACCCCTGGCTTCCTGCGAAGTCTTTCTGATTCCTTCTTCGCTCTTTCTTACTTTTGTAACTCAACTCTTTCCTTTATTTATTAAAATTCCCCTCCTGTTCTTAAAAAAAAA	338
ba1430	DEL	Chr2	28732636	28733069	TGGGTCCTCTTAGTTGTATTATAATTTATAAGTTACTAATTTGAAATAAGTTAGACCCCGTTTGTTTCTTTAGCACCTCCTAAAATTTCTATCGCATCGAATGTTTAGATACTAATTAGGAGTATTAAATATAGATTAATTATAAAACTAATTGCACATATGGAAACTAATTTGCGAGACGAATCTATTAAGCTTAATTAGTCCATGATTTGACAATGTGGTGCTACAGTAAACATGTGCTAATGATGGATTAATTAGGCTTAATAGATTCGTCTCGGGAATTAGCATCCATCTGTGTAATTAGTTTTATAATTAACTCATATTTAGTCCTCCTAATTAGACTCCAAATATTCGATGTGACATAAATTTTAATCGGGACTAAAGACCCAAACACCCCCT…	347
ba1431	DEL	Chr2	28736074	28736462	GGAGCATTTTTTGGCCTTGTTTGGGAGGAGGGGCTAAAATTTAGCCTTGGGCTAAACTTTAGCCCTCTCAAATGTTGAGGCTAAAGTTTAGCCCTTGGGGTGTTTGGGTAAGGGGCTAAAGTTTAGCACTTATGTTGACAAAAGACCTATTTACCCATGTTGGAGGAGTGAGAGGGAGGAGAGAGAGAGGGGCAAGGGGAGGAATTTTGGATAAGGGGACCACTTTTAGCCTCTTTAGTCCATTTTAGCACCTCTTGAGGGGCTAATGGATTATGGGGGGCTAAAATTTAGCCCCTCCATTTTAGCCTAGGTGTTTGGGAGCACTAGTGGCTAAAGGTGACTAAAATGGGGGTGCTAAAATTTAGCACCCCTCTCCCAAACACCCCAA	375
ba1432	DEL	Chr2	28736815	28737106	TTTCGCATGATTTAGGCCATGTTTAGTTACTCCCAACTTCCAACTTTGACACTATGCAAAAAGAAGATTCCCCATCACATCAAACTTGCGGTACATGCATGGAGTACTAAATGTAGATGAAATTAAAAAGTAATTGCACAGTTTTGTTGTACTTTACGAGACGAATCTTTTGAGCCTAATTAGTCAATATTTGGACAATAATTCACAAATACAAACGAAACGCTACAGTGTGCTACAGTGCTGTAACAGTAATTTGGCACCTCCCAAATTGGCCAACTAAACAAGGCCTTA	272
ba1436	DEL	Chr2	28861633	28861904	AGCATGATCTAGTTTATATTTGATGCTTTGTAGTGGAAGCCATAGGTTAAGATTTTAAGTTTGCATAATTTACTCTCTCCCCTTATTAGGCTACGAGCACCAATTCCTTACACTTACCATCGATCAACCTTAGTTGCACATCTTGATAGTATGATCTAATTTATATTTGATGCTTTGTAGTGGAAGCCATAGGTTAAGGTTTTAAGTTTGCATAATTTACTCTCTTCCCTTATTAGGCTACGAGCACCAATTCCTTACACTTACCATCGCA	151
pD3045	DEL	Chr2	28939077	28939362	TCCCAGGCCTTGTTTAGTTGCCAAAGTTTGGAGGTGCCAAATTACTGTTACAGCACTGTAGCATACTGTAGCGTTTCGTTTGTATTTGTGAATTATTGTTCAAACACTGACTAATTAGGCTCAAAAGATTCGTCTCGCAAAGTACAACAAAACTGTGCAATTAGTTTTTAATTTTGTCTACATTTAGTACTCCATGCATGTACCGCAAGTTTGATGTGATGGGGAATCTTTATTTTTGCATAGTGCCAAAGTTGGGAGTTGGGGGTGAACTAAACAAGGGCCCAG	279
ba1439	DEL	Chr2	28982169	28982495	TAAACTTTAACAGTGTCACATCGGATGTTCGGATGCTAATTAGGAGAACTAAACATGAGGTAATTATAAAACTAATTGCAGAACCCTGTGCTAATTCGCGAGACGAATCTATTAAGCCTAATTAATCCATCATTAGCAATTGGTTACTGTAGCACCATATTGTCAAATCATGGACTAATTAGGCTTAATAGATTCGTCTCGTGAATTACACTCCATCTGTGCAATTAGTTTTGTAATTAACCTATGTTTAATACTCCTAATTAGCATCCAAACATCCGATGTGACAGGTGTTAAACTTTAACACTTGATTGCCAAACACGCCCTTA	353
ba1442	DEL	Chr2	29094839	29095103	TTTAGTTCACCCCAAATTCCAACTTTGACACTATGCAAAAAGAAGATTCCCCATCACATCAAATTTGCAGTACATGCATGGAGTATTAAATGTAGACGAAATTAAAAACTAATTGCACAATTTTGTTGTACTTTGCGAGACGAATCTTTTGAGCCTAATTAGTCAATGTTTGGACAATAATTCACAAATACAAACGAAACGCTACAGTATGCTACAGTGCTAGCACAGTGATTTTGGCACTTCAAAATTGGGCAACTAAACATG	284
ba1445	DEL	Chr2	29126204	29126452	GTGCCCCGCACTCCATATTGGATTAGAGCCAGTTTGGCAGGGCTCCGGCTCCAGCTCCGTGCGCTTACCGAAGCACGGAGGAGCCGGAGCCGCACCAAACGGCATTGGCCGCGGAGTCATTTTTTGGCACATTTGGGAGGAGCCGGAGCCGTTTTAGGTCTGCATGGAGGAGTCCAAAAAAATGGCTCCGCGGCTCCGGCTCCGGCTCCGCACGAGGAGCCCCTCGCGAGGAGCCTGCCAAACTCGCC	231
ba1447	DEL	Chr2	29157022	29157257	AAAAAATAATGGGTGTACATCTGTACACCCATGTCCCTCTACTACGTCCGCCAGTTCTGGACTAACTATGAGCTAGCACATGAATTATACATACTAGCTGCTAGAGTTTTGCAAAAAATAATGGGTGTACATCTGTACACCCATGTCCCTCTACTACGTCCGCCAGTTCTGGACTAACTATGAGCTAGCACATGGATTATACATACTAGCTGCTAGAGTTTTGCAAAAAATAATG	222
ba1448	DEL	Chr2	29201222	29201560	TTGGGAGGAGGGAGCTAAATTTTAGCCCTGTCACATCGGATGTTCGGATGTTAATTAGGAGGACTAAACATAAGCTAATTACAAAACTAATTACAGAACCCCTATGCTAAATCGCGAGACGAATCTATTAAGCCTAATTAATCCATCATTAGTGAATGGTTACTGTAGCATCACATTGTCAAATCATAGACTAATTAGGCTTAATAGATTCGTCTCGCGATTTAGCCTAGGGGTTGTGTAATTAGTTTTGTAATTAGTCTAGATTTAATACTCCTAATTAGTGTCCAAACATTCGATGTGACGGGGGCTAAAATTTAGCCCCCTCCTCCCAAACACCC	351
ba1451	DEL	Chr2	29397594	29397767	CAGTGTGTGTTTGAGTCCGCATAAATTAGTTTCATACACATGCTCAGATCACGGGATTGTCGCGCCGGTCGTCCATCGCTTAGTCGTCAGGTTCAGGCATTCTCTGGCGGCAAACCAAAGAACCCAGAAGAATGCAGCCCAGCCTGAAGAAACGCACACGAAGGCGATAATTG	200
pD3077	DEL	Chr2	29563632	29563914	GCAAGGCCATGTTTAGTTACTCCCAACTTCCAACTTTGACACTATGCAAAAAGAAGATTCCCCATCACATCAAACTTGCGGTACATGCATGGAGTACTAAATGTAGATGAAATTAAAAAGTAATTGCACAGTTTTGTTGTACTTTGCGAGACGAATCTTTTGAGCCTAATTAGTCAATATTTGGACAATAATTCACAAATACAAACGAAACGCTACAGTGTGCTACAGTGCTGTAACAGTAATTTGGCACCTCCCAAATTCGCCAACTAAACAAGGCCCAAG	277
ba1461	DEL	Chr2	30427660	30427995	CTTATTTTTAGCACCCGTCACATCGAATGTTTAGATACTAATTAGGATTATTAAACGTAGACTATTTACAAAACCCATTACATAAGACGAATCTAAACGGCGAGACGAATCTATTAAGCCTAATTAGTCCATGATTTGACAATGTGTTGCTACAGTAAATATTTGCTAATGATGGATTAATTAGACTTAATTAGGCTTAATAGATTCGTCTCGCCGTTTAGCCTCCACTTATGTAATTGGTTTTGTAAATAGTCTACGTTTAATACTCCTAATTAGTATCTAAACATTCGATGTGACACGTGCTAAAAATAAGACAGTGGAAGAAAACGCCCCCT	351
ba1464	DEL	Chr2	30695015	30695160	GTAATAATGTAGGACCTGTTCGCTTCAGCTTATAAGCCGGCTGAAAAGCTGCAACGGCTGATTTGTTGTGAGAGAAAAACACTGTTTGGTGGCTGATAAGCCGGCTGAATAAGCTGAAGCGAACAGGCCCGTAGTATCGCCCAGC	121
pD3104	DEL	Chr2	30746403	30746745	GGGGCCTTGTTTAGTTGTCTAATTTTGGTTGTTCAAAATTACTGTGCTAGTACTGTAGCACACTGTAGCGTTTCGTTTGTATTTGTGAATTATTGTCCAAATATTGACTAATTAGGCTCAAAAGATTCGTCTCGCAAAGTACAACCAAACTGTGCAATTAGTTTTTGATTTCGTCTACATTTAGCACTCCATGCATGTACCGCAAGTCAAAAAGTACAACCAAACTGTGCAATTAGTTTTTGATTTCGTTTACATTTAGCACTTCATGCATGTACCGCAAGTTTGACGTGATGGGGAATCTTCTTTTTGCATAGTATCAAGTGGGGAACTAAACAGGCCCCT	341
ba1470	DEL	Chr2	30961646	30961801	AAACTATACTCCCTCCGTTCCAAATTATAGGTCGTTTTGACTTTTCTAGATACATAGATATTATTATGTATCTAGACATAAGGTATATCTAAGTGCATAACAAAGTCTATAAATCTAATAAAGTCAAAACGACCTATAATTTGGGACGGAGGGAG	139
ba1471	DEL	Chr2	31024840	31025163	GCTAAACTTTAGCACCCGTCACATCAAATGTTTAGATACTAATTAGAAGTATTAAACGTAGACTATTTACAAAACCCATTACATAAGACGAATCTAAACGGCGAGACGAATCTATTAAGCCTAATTAGTCCATGATTTGACAATGTGTTGCTACAGTAAATATTTGCTAATGATAGATTAATTAGGCTTAATAGATTCGTCTCGCTGTTTAGATTCCACCTATGTAATTGGTTTTGTACATAGTCTACGTTTACTACTCCTAATTAGTATCTAAACATTCGATGTGACACGTGCTAAAAATAAGACACGGGAAGAAAACGCCC	356
ba1474	DEL	Chr2	31281482	31281771	TACTCATTAGGAGGACTAAACATAAGCTAATTACAAAACTAATTGCAGAACCCCTAGGCTAAATCGCGAGACGAATCTATTAAGCCTAATTAATCCATCATTAGTGAATGGTTACTGTAGCACCACATTGTCAAATCATGACCTAATTAGGCTTAATAGATTCGTCTCGCGATTTAGCCTAGGGGTTGTGTAATTAATTTTGTAATTAGTCTAGATTTAATACTCCTAATTAGTGTCCAAACATTCGATAGGATGGGGGCTAAAATTTAGCCCCCTCCTCCCAAACACC	348
ba1475	DEL	Chr2	31507131	31507424	TTTCATTAGTAATGCTCGCCTAGGGCCATGTTTAGTTACTCCCAACTCCCAACTTTGACACTATGCAAAAAGAAGATTCCCCATCACATCAAACTTGCGGTACATGCATAGAGTACTAAATGTAGATGAAATTAAAAACTAATTGCACAGTTTTGTTGTACTTTGCGAGACGAATCTTTTGAGCCTAATTAGTCAATATTTGGACAATAATTCACAAATACAAACGAAACGCTACAGTGTGCTACAGTGCTGTAACAGTAATTTGGCACCTCCCAAATTCCCCAACTAAACAA	271
ba1477	DEL	Chr2	31739086	31739437	ATAAGGGCCTGTTTGGCAACCAAGTGTTAAAATTTAACACCTGTCACATCGGATGTTTGGATGCTAATTAGGAGTATTAAATATAGGCTAATTACAAAACTAATTGCACAGATGAAGTGTAATTCACGAGACGAATCTATTAAGCCTAATTAGTCCATGATTTGACAATGTGGTGCTACAGTAACCAATTGCTAATGATGGATTAATTAGGCTTAATAGATTCGTCTCGCGGATTAGCACAGGGTTCTGCAATTAGTTTTATAATTAGCTCATATTTAGTTCTCCTAATTAGCATCCGAACATCCGATGTGACACTGTTAAAGTTTAACACCTCGTATCCAAACACCCCAA	352
ba1481	DEL	Chr2	31975233	31975654	ATGCTAATTAGGAGGACTAAACATGAGCTAATTATAAAACTAATTGCAGAACCTTGTGCTAATTCGCGAGACGAATCTATTGAGCCTAATTAATCCATCATTAGCAAATGGTTACTGTAGCACCACATTGTCAAATCATGGACTAATTAGGCTTAATAGATTCGTCTCGCGAATTATACTCCATCTGTGCAATTAGTTTTGTAATTAGCTTATGTTTAGTACTCCTAATTAGCATCCAAACATTCGATGTGATAGGTGTTAAACTTTAACGGGTGTTTCCCAAACACCCCCTAAGCAAGGCGTGCGTTGCTACAGAGGACTCGCGTGTTCCATGAGGGCGACAAAAGAACATTCTGGATACATACCTAGAAAATAAGATTCCACCGTTTTTACACGTTA…	351
ba1484	DEL	Chr2	32233027	32233373	TGGGGGTGTTTGGGAACACCCTATTAAAATTTAACACCTGTCACATCGAATGTTTGGATGCTAATTAGGAATACTAAACATAAGCTAATTACAAAACTAATTGCACAGATGGAGTATAATTCGCGAGACGAATCTATTAAGTCTAATTAGTCCATGATTTGACAATGTGGTGCTACAGTAACCATTTGCTAATGATGGATTAATTATGCTTAGTAGATTCGTCTCACGAATTAGCACAAGGTTCTGCAATTAGTTTTATAATTAGCTCATGTTTAGTCCTCTTAATTAGCATCCGAATATCCGATGTGACACTGTTAAAGTTTAGCACCTCGTATCCAAACAGCCC	351
ba1485	DEL	Chr2	32444849	32445068	TTCCCCATCACATCAAACTTGCGGTACATACATGGAGTACTAAATGTAGATGAAATTAAAAACTAATTGCACAGTTTTGTTGTACTTTGCGAGACGAATCTTTTGAGCCTAATTAGTCAATATTTGGACAATAATTTACAAATACAAACGAAACGCTACAGTGTGCTACAGTGCTGTAACAGTAATTTGGCACCTCCCAAATTCCCCAACTAAACACGG	289
ba1487	DEL	Chr2	32742566	32742708	GTTCCAAATTATAGGTCGTTTTAGCTCTTTTAGATTCATAGATATTATTATGCATCTAGACATACACTATATCTAGATGCATAATAATATCTATGAACCTAGAAAAGCCAAAACGACCTACAATTTGGAACGGAGGGAGTAG	149
ba1489	DEL	Chr2	33038374	33038746	GCGGCTGCATGGATGGATGCTTTAGGGGGTGTTTGGGAACACCCTGTTAAAGTTTAACACCTATCACATCGGATGTTTGGATGCTAATTAGGAGTATTAAACATAGGTTAATTACAAAACTAATTGCACAGATGGAGTATAATTCGCGAGACGAATCTATTAAGCCTAATTAGTCCATGATTTGACAATGTGGTGCTACAGTAACCATTTGCTAATGATGGATTAATTAGGCTTAATAGATTCGTCTCGCAAATTAGCACAGGGTTCTGCAATTAGTTTTATAATTAGCTCATGTTTAGTGCACCTAATTAGTATCCGAACATCCGATGTGACACTGTTAAAGTTTAACACCTCGTATCCAAACACCCCCTT	358
ba1492	DEL	Chr2	33443432	33443688	CTCCCAACTCCCAACTTTGACACTATGCAAAAAGAAGATTCCCCATCACATCAAACTTGCGGTACATGCATGGAGTACTAAATGTAGATGAAATTAAAAACTAATTGCACAGTTTTGTTGTACTTTGCGAGACGAATCTTTTGAGCCTAATTAGTCAATATTTGGACAATAATTCACAAATACAAACGAAACGCTACAGTGTGCTACAGTACTGTAACAGTAATTTGGCACCTCCCAAATTCCCCAACTAAACACG	277
ba1500	DEL	Chr2	34146587	34146915	ATTGAATTCCATCCTAATAATCATAATTTAGACACAAATTAATTAAGCTAATATAATTGTATGTGGAATATAGTTGCATATTATAGTTGGTGATATGGGAGAGATACTTGTATGCTGCACTTCTACTATAGAGAAGCGAATCTAAAAGCGTGCTATAAGAATTGAATTCCATTCTAATAACCATAATCTATAGAATCAATTTCCATCTCCCACCCCATGAATTTAAGATAGGCTTATATCTAAACTTTGGAAAGTTGTAGAATGCCACATTCCAACATAAATTAGCCTACTCCATTAAATAGATTCCAATTCCTTGGACCCAAACGGG	356
ba1501	DEL	Chr2	34200682	34200925	CATTCCAACTTTCTTGGAGAGTCAAAGCATCTCAAGTTTGACCAAATTTATACAATAAAGTGCTAACATTCATGATATCAAATAGGCACCATTAGTTCCTTCATTAAATATATTTTCATAATATATCTATTCGATGCCATAAACTTTTGTGATTTTCTCTATAATTTTAGTCAAACATAAAAATGTTTGACTCTCCAAGAAAGTTGGAATGACTTATAATTTGGAACGGAGGGAGTATATGCC	261
ba1503	DEL	Chr2	34414997	34415355	AGTTTAGGGGGTGTTTGGGAACACCGTGTTAAAGTTTAACACCTGTCACATCGGATGTTTGGATGCTACTTAGGAGTATTAAACATAGGCTAATTATAAAACTAATTGCACAGATGGAGTATAATTTGCGAGATGAATCTATTAAGTCTAATTAGTCCATGATTTGACAATGTGGTGCTACAGTAACCATTTGCTAATGATGGATTAATTAGGCTTAATAGATTCATCTCACCAATTAGCATAGGGTTCTGCAATTAGTTTTATAATTAGCTCATGTTTAGACCATTTAATTAGCATCCGAACATCCGATGTGACACTGTTAAAGTTTAGCACCTCGTATCCAAACACCCCCTTAGTC	349
ba1504	DEL	Chr2	34450420	34450770	TTGGATACGAGGTGCTAAACTTTAACAGTGTCACATCGGATGTTCGGATGCTAATTAGGAGGACTAAACATGAGCTAATTATAAAACTAATTGCAGAACCTTGTGCTAATTCGCGAGACGAATCTATTGAGCCTAATTAATCCATCATTAGCAAATGGTTACTGTAGCACCACATTGTCAAATCATGGACTAATTAGGCTTAATAGATTCGTCTCGCGAATTATACTCCATCTGTGCAATTAGTTTTGTAATTAGCTTATGTTTAGTACTCCTAATTAGCATCCAAACATTCGATGTGATAGGTGTTAAACTTTAACGGGTGTTTCCCAAACACCCCCTGAATCTAGGTG	345
ba1511	DEL	Chr2	35072324	35072557	CACCACATGATGGTATGCATAGATGATCCTGGATGGGGTGGTTCAACCAATTTGCTTGTAGCATATGGTTCACTCTAATTAGTAGAATAATGTATTAAGTGGGATGATCTCGTCCTGGATGAGTTGGTCCAATTCATCCAACCAAACAAAAGGATCATTATTATTTTGAATCATTTCATACATGAATCAAATGATACAACCAACCAAACACACCCTATATGAGCGTGTTTTGT	241
ba1512	DEL	Chr2	35107327	35107664	GGGGGGGGGGCTCTCCTATATGGCTCGTGGAAGCCAGTTAAGTCTCATAAATTTAAAGCCGATTAGACCCAGGTCATGTTTAGTTCACTCCAAAATACCAACTTTGGCGCTATGCAAAAAGAAGATTCCCCCATCACATCAAACTTGCGGTACATGCATGGAGTACTGAATGTAGACGAAATCAAAAACTAATTGCACAGTTTTGTTGTACTTTGCGAGATGAATCTTTTGAGCCTAATTAGTCAATATTTGAACAATAATTCACAAATACAAACGAAACGCTACAGTGTTGCTACAGTAATTTTGGCACTCCAAAATTGGGCAACTAAACAAGGCC	280
ba1513	DEL	Chr2	35119629	35119946	GGCCATGTTTAGTTACTCCCAACTCCCAACTTTGACACTATGCAAAAAGAAGATTCCACATCACATCAAACTTGCGGTACATGCATGGAGTACTAAATGTAGATAAAATTAAAAACTAATTGCACAGTTTTGTTGTACTTTGCGAGACGAATCTTTTGAGCCTAATTAGTCAATATTTGGACAATAATTCACAAATACAAACGAAACGCTACAGTGTGCTACAGTGCTGTAACAGTAATTTGGCACCTCCCAAATTCCCCAACTAAACACGGCCTTATTATAAAAATTGCATTCTCATTAGCTAAGGACGACGTTGT	284
ba1519	DEL	Chr2	35230218	35230545	GTGGTGTTAAACTTTAACAGTGTCACATCGGATGTTCGAATGCTAATTAGGAGAACTAAACATGAACTAATTATAAAACTAATTGCAGAACCCTGTGCTAATTCGCGAGACGAATCTATTAAGCCTAATTAATCCATCATTAGCAATTGGTTACTGTAGCACCATATTGTTAAATCATGGACTAATTAGGCTTAATAGATTCGTCTCGTGAATTACACTCCATCTGTGCAATTAGTTTTGTAATTAGCCTATATTTAATACTCTAATTAGCATCCAAACATCCGATGTGATAGGTGTTAAACTTTAACACATGGTTGCCAAACAGCC	350
ba1520	DEL	Chr2	35526146	35526517	GGGAAACCCCTGTTAAAGTTTAACACCTGTCACATCGGATGTTTGGATGCTAATTAGGAGTACTAAACATAAGCTAATTACAAAACTAATTGCACAGATGGAGTATAATTCGCGAGACGAATCTATTAAGCCTAATTAGTCCATGATTTGACAATGTGGTGCTACAGTAACCATTTGCTAATGATGGATTAATTAGGCTTAATAGATTCGTCTCGCGAATTAGCACAAGGTTCTGCAATTAGTTTTATAATTAGCTCATATTTAGTCCTCCTAATTAGCATCCGAACATCCGATGTGACACTGTTAAAGTTTAGCACCTCATATCCAAACAGCCCCTAAAGCAAACCGAATAACCGGTGCAAGAATCATTG	341
ba1522	DEL	Chr2	35656539	35656836	GTTACTCCCAACTCCCAACTTTGACACTATGCAAAAAGAAGATTCCCCATCACATCAAACTTGCGGTACATGCATGGAGTACTAAATGTAGATGAAATTAAAAACTAATTGCACAGTTTTGTTGTACTTTGCGAGACGAATCTTTTGAGCCTAATTAGTCAATATTTGGACAATAATTCACAAATACAAACGAAACGCTACAGTGTGCTACAGTGCTGTAACAGTAATTTGGCACCTCCCAAATTCCCCAACTAAACAAGGCCCTAGATTTTTTTTTCTAGAGGGGACAGGACTTCA	284
ba1532	DEL	Chr2	36193382	36193542	CGGAGCTGCGCCCCGGGCTGAGCTGTTGAATCACGCCCAAAACAGTCTAATCTTATCTCCTAAGCCTCATTTTGTTAGGCTAAACACCACATATGTTAAAGGGACTTCATGGTCTCGCTCCGGGCTGCAGCCCGGACAGCCCGAGCCCTAGATCCGCCCC	186
ba1539	DEL	Chr2	36360031	36360249	ATGCATTACATGATGCATGCATGGATGATCCTGGATGGGGTGGTTCAACCAATTTGCTTGTACCATATGGTTCACTCTAATTAGTAGAATAATGTATTAAGTGGGATGGTCTCATCCTGGATGAGTTGGTCCAATTCACCAAACCAAACAAAAGGATCATTATTATTTTGAATCATTTCATATATGAATCAAATGATACAACCAACCAAACACACCCT	240
ba1540	DEL	Chr2	36413683	36414111	ACTTCCCTGATTATCTCTTGCGCAACTATTTTTTATCACAGCCGTAATTTGTCTATCAGACAAGAGATTTACCTCTTAGGCCCCGTTTGGATCATTGGAATTGAATTCCATCCTAATAATTATAATTTAGACACAAATTAATTAAGCTAATATAATTGTATGTGGAATATAGTTGTATATTATAGTTGGTGATATGGGAGAGATACTTGTATGCTGCACTTCTACCATAGAGAAGCGAGTCTAAGAGCGTGCTATAAGAATTGAATTCCATTCTAATAACCATAATCTATAGAATCAATTTCCATCTCCCACCCCATGAATTTAAGATAGACTTATATCTAAACTTTGGAAAGTTGTGGAATGCCACATTCCAACATAAATTAGCATACTCCATTAAAT…	346
ba1547	DEL	Chr2	36627809	36628150	TGGATAGCAGGTGCTAAATTTTAGCACCTGTCACATCGGATGTATGGATACTAATTAGGAGTATTAAACATAGTCTAATTACAAAACTAATTGCACAACCGCTAGGCTAAATCGCGAGACGAATCTATTAAGCCTAATTAATCCATCATTAGCGAATGATTACTGTAGCACCACATTGATTGGAATTGGGGATCGCTCGCTTAATAGATTCGTCTGGATTTAGCCTAGGGGTTGTGCAATTAGTTTTGTAATTAGGCTATGTTTAATACTCCTAATTAGTGTCCAAACATCCGATGTGACAGGTGCTAAAATTTAGCACATGCCTCCCAAACACCCCCTAA	357
ba1549	DEL	Chr2	36705701	36706056	GCGCCCGTCTCGGATCTGTTTATTTTGCTGAAGCACTATATATGGGGGTGTTTGGGAAACACCCGTTAAAGTTTAACACCTATCACATCGAATGTTTGGATGCTAATTAGGAGTACTAAACATAAGCTAATTACAAAACTAATTGCACAGATGGAGTATAATTCGCGAGACGAATCTATTAAGCCTAATTAGTCCATGATTTGACAATGTGGTGCTACAGTAACCATTTGCTAATGATGGATTAATTAGGCTCAATAGATTCGTCTCGCGAATTAGCACAAGGTTCTGCAATTAGTTTTATAATTAGCTCATGTTTAGTCCTCCTAATTAGCATCCGAACATCCGATGTGACACT	314
ba1550	DEL	Chr2	36709001	36709250	CCCAACTTTGACACTATGCAAAAAGAAGATTCCCCATCACATCAAACTTGCGGTACATGCATGGAGTACTAAATGTAGATGAAATTAAAAACTAATTGCACAGTTTTGTTGTACTTTGCGAGACGAATCTTTTGAGCCTAATTAGTCAATATTTGGACAATAATTCACAAATACAAACGAAACGCTACAGTGTGCTACAGTGCTGTAACAGTAATTTGGCACCCCCAAATTCGCCAAACTAAACACGGC	274
ba1551	DEL	Chr2	36719666	36720000	ATTTTTAGCACGTGTCACATCGAATGTTTAGATACTAATTAGGAGTAGTAAACGTAGACTATTTACAAAACCAATTACATAAGTGGAATCTAAACGGCGAGACGAATCTATTAAGTCTAATTAAGCCTAATTAATCCATCATTAGCAAATATTTACTGTAGCAACACATTGTCAAATCATGGACTAATTAGGCTTAATAGATTCGTCTCGCCGTTTAGATTCGTCTTATGTAATGGGTTTTGTAAATAGTCTACGTTTAATACTTCTAATTAGTATCTTAACATTCGATGTGACGGGTGCTAAAGTTTAGCAAGTGGAAGAAAACAGGCTCTTA	360
ba1552	DEL	Chr2	36742107	36742411	CGTGCTAGCCAGCCTGCTATGCTACTAGGGCCTTGTTTAGTTGGGGAATTTGGGAGGTGTCAAATTACTGTTACAGCACTGTAGCACACTGTAGCGTTTCGTTTGTATTTGTGAATTATTGTCCAAATATTGACTAATTAGGCTCAAAAGATTCGTCTCGCAAAGTACAACAAAACTGTGCAATTAGTTTTTAATTTCATCTACATTTAGTACTCCATGCATGTACCGCAAGTTTGATGTGATGGGGAATCTTCTTTTTACATAGTGTCAAAGTTGGGAGTTGGGAGTAACTAAACATGGCCTA	282
ba1553	DEL	Chr2	36771852	36772103	GAGGTGCCAAATTACTGTTACAGCACTGTAGCACACTGTAGCGTTTCGTTTGTATTTGTGAATTATTGTCCAAATATTGACTAATTAGGCTCAAAAGATTCGTCTCGCAAAGTACAACAAAACTGTGCAATTACTTTTTAATTTCATCTACATTTAGTACTCCATGCATGTACCGCAAGTTTGATGTGATGGGGAATCTTCTTTTTGCATAGTGTCAAAGTTGGAAGTTGGGAGTAACTAAACATGGCCTC	272
ba1561	DEL	Chr2	38242256	38242506	TTGGGAGGTGCCAAATTACTGTTACAGCACTGTAGCACACTGTAGCGTTTCGTTTGTATTTGTGAATTATTGTCCAAATATTGACTAATTAGGCTCAAAAGATTCGTCTCGCAAAGTACAACAAAACTGTGCAATTACTTTTTAATTTCATCTACATTTAGTACTCCATGCATGTACCGCAAGTTTGATGTGATGGTGAATCTTCGTGTCAAAGTTGGAAGTTGGGAGTAACTAAACATGGCCAGCTGGT	258
pD3321	DEL	Chr2	38247314	38247417	CTGTGCCATGCATTGACAATTCTGTATGCCATTAGAAATTATATCAATCCCAACCCTCCTATGCCATTGAAAAACTCCACTTCTCTTCCGTGCCGTTAGTTGA	102
pD3322	DEL	Chr2	38255087	38255451	GCTAAGGGCCTGTTTTCTTCCGCTTGCTAAACTTTAGCACCTGTCACATCGAATGTTTAGATACTAATTAGGAGTATTAAATGTAGACTATTTACAAAACCCATTACATAAGACGAATCTAAACGGCGAGACGAATCTATTAAGCTTAATTAGTCCATGATTTGACAATGTGTTGCTACAGTAAATATTTGCTAATGATGGATTAATTAGGCTTAATTAGGCTTAATAGATTCGTCTCGCCGTTTAGATTCCACTTATGTAATTGGTTTTGTAAATAGTCTACGTTTACTACTCCTAATTAGTATCTAAACATTCGATGTGACACGTGCTAAAAATAAGACACGGGAAGAAAACGCCCCCTAAG	358
pD3325	DEL	Chr2	38271110	38271463	TTTTAAGTCCGTTTGGCAACCAGCTGTTAAAGTTTAACACCCGTCACATCGGATGTTTGGATGCTAATTAGGAGTATTAAATATAGACTAATTACAAAACTAATTGCACGGATGGAGTATAATTCGCGAGACGAATCTATTAAGCCTAATTAGTCCATGATTTGACAATATGGTGCTACAGTAACCATTTGCTAATGATGGATTAATTAGGCTTAATAGATTCGTCTCGTGAATTAACACAGGGTTCTGCAATTAGTTTTATAATTAGCTCATGTTTAGTTCTCCTAATTAGCATCCGAACATCCGATGTGACACTGTTAAAGTTTAACACCTCGTATCCAAACACCCCCTTT	349
ba1565	DEL	Chr2	38344457	38344709	TCCAACTTTGACACTATGCAAAAAGAAGATTCCCCATCACATCAAACTTGCGGTACATGCATGGAGTACTAAATGTAGATGAAATTAAAAACTAATTGCACAGTTTTGTTGTACTTTGCGAGACGAATCTTTTGAGCCTAATTAGTCAATATTTGGACAATAATTCACAAATACAAACGAAACGCTACAGTGTGCTACAGTGCTGTAACAGTAATTTGGCACCTCCCAAATTCCCCAACTAAACAAGGCCTA	296
ba1566	DEL	Chr2	38462677	38463016	TGGCAAGTAGGTGTTAAAGTTTAACACCCGTCACATCGGATGTTTGGATGCTAATTAGGAGTATTAAATATAGACTAATTACAAAACTAATTGCACAGATGGAGTGTAATTCGCGAGACGAATCTATTAAGCCTAATTAGTCCATGATTTGACAATGTGGTGCTACAGTAACCATTTGCTAATGATGGATTAATTAGGCTTAATAGATTCGTCTCGTGAATTAACACAGGGTTCTGCAATTAGTTTTATAATTAGTTCATATTTAGTTCTTCTAATTAGCATCCGAACATCCGATGTGACACTGTTAAAGTTTAACACCTCGTATCCAAACACCCCCTA	350
ba1567	DEL	Chr2	38591069	38591479	TTCTTGGATAGTGAAATAATAACACTAAGGGCCTGTTTGGCAACCATGTGTTAAAGTTTAACACCTGTCACATCGGATGTTTGGATGCTAATTAGAAGTATTAAACATAGGCTAATTACAAAACTAATTGCACAAATGGAGTGTAATTCACGAGACGAATCTATTAAGCCTAATTATCCATGATTTGACAATGTGGTGCTACAGTAACCAATTCCTAATGATGGATTAGTTAGGCTTAATAGATTCGTCTCGCGAATTAGCACAGGGTTCTGCAATTAGTTTTATAATTAGCTCATGTTTAGTTCTCCTAATTAGCATCCGAACATTCAATGTGACACTGTTAAAGTTTAACACCTCGTATCCAAACACCCCCTAAGACCAATTGTTTTAAATGGGACA…	346
ba1568	DEL	Chr2	38676601	38676988	AAAGTTTAACACCCGTCACATCGAATGTTTGGATGCTAATTAGGAGTATTAAACATAGACTAATTACAAAACTAATTGCACAGATGGAGTGTAATTCGTGAGACGAATCTATTAAGCCTAATTAGTCCATGATTTGACAACGTGGTGCTACAGTAACCATTTGTTAATGATGGATTAATTAGGCTTAATAGATTCGTCACGTGAATTAGCACAGGATTATGCAATTAGTTTTATAATTAGCTCATGTTTAGTTCTCCTAATTAGCATCCGAACATCCGATGTGACACTGTTAAAGTTTAGCACCTCGTATCCAAACACCAGTATCCCCTCGCCCGGGGGCCGGGGCTCCCCCAGACCCCAGTCTCCTCGCGTGCCCTCCCAGTGCCA	346
ba1572	DEL	Chr2	38854825	38855128	TACTCCCAACTTCCAACTTTGACACTATGTAAAAAGAAGATTCCCCATCACATCAAACTTGCGGTACATGCATGGAGTACTAAATGTAGATGAAATTAAAAACTAATTGCACAGTTTTGTTGTACTTTGCGAGACGAATCTTTTAAGCCTAATTAGTCAATATTTGGACAATAATTCACAAATACAAACGAAACGCTACAGTGTGCTACAGTGCTGTAACAGTAATTTGGCACCTCCCAAATTCCCCAACAAAACACGGCCTAAAGCAAGCCACATCCGCACGCCTATGGCAGTAGGCCCCGG	275
ba1573	DEL	Chr2	38906218	38906538	CCAACTTTGACACTATGCAAAAAGAAGATTCCCCATCACATCAAACTTGCGGTACATGCATGGAGTACTAAATGTAGATGAAATTAAAAACTAATTGTACAGTTTTGTTGTACTTTGCGAGACGAATCTTTTGAGCCTAATTAGTCAATATTTGGACAATAATTCACAAATACAAACGAAACGCTACAGTGTGCTACAGTGCTGTAACAGTAATTTAGCACCCCCAAATTCGCCAAACTAAACACGGCCTAAGTTTTTGGGGTAGGCCGGGGCCAGGCCGGGCCTGACGCGGCTCCTTATTTTAATTTTCAAGTAATGAG	286
ba1575	DEL	Chr2	39123982	39124378	CATTATACGTGACAAAAAACGGTAGCAGAGAACAAGATGCGTGACTCAGGGGGTGTTTGGACACGAGGTGTTAAACTTTAACAGTGTCACATCGGATGTTCGGATGCTAATTAGAAGAACTAAATATGAACTAATTATAAAACTAATTGCAGAACCCTGTGCTAATTCACGAGACGAATCTATTAAGCCTAATTAATCCATCATTAGCAAATGGTTACTGTAGCACCACATTGTCAAATCATGGACTAATTAGGCTTAATAGATTCGTCTCGCGAATTACACTCCATCTGTGCAATTAGTTTTGTAATTAGTCTATATTTAATACTCCTAATTAGCATCCAAACATCCGATGTGACGGGTGTTAAACTTTAACACCTACTTGCCAAACAGGCCCTC	351
ba1576	DEL	Chr2	39181881	39182244	CGTTTGGATGTCAGGGGCTAAACTTTAGCCCTGTCACATCACACGTTCAGATGCTAATTAGGAGGACTAAATATGAGCTAATTAAAAAACCAATAGCAGAACCCATAGGCTAAATCGCGAGACGAATCTATTAAGCCTAATTAATCCATCATTAGCGAATGGTTACTGTAGCACCACATTGTCAAATCATGGACTAATTAGGCTTAATAGATTCGTCTCGCGATTTAGCCTAGGGGTTGTGCAATTAGTTTTGTAATTAGACTATGTTTAATACTCCTAATTAGTGTCCAAACATCCGATGTGACAGGGGCTAAAATTTAGCCCCTCCCTGCCAAACACCCCCTAATTTTGCTATTTGAGCCT	341
ba1577	DEL	Chr2	39264891	39265258	CCTGGTGAACATAGTTAGGGGGTGTTTGGGAAACACCTGTTAAAGTTTAACACCTATCACATCGGATGTTTGGATGCTAATTAGGAGTACTAAACATAAGCTAATTACAAAACTAATTGCACGGATGGAGTATAATTCGCGAGACGAATCTATTAAGCCTAATTAGTCCATGATTTGACAATGTGGTGCTACAGTAACCATTTGCTAATGATGGATTAATTAGGCTTAATAGATTCGTCTCGCGAATTACCACAAAGAGGTGGAATTAGTTTTGTAATTAGCTCATGGTTAGTCCTCCTAATTAGCATCCAAACATCCGATGTGACACTGTTAAAGTTTAGCACCTCGTATCCAAACAGCCCCTTAG	340
ba1579	DEL	Chr2	39539020	39539293	GGCCGTGTTTTAGTTTGGCGAATTTGGGGGTGCTAAATTACTGTTACAGCACTGTAGCACACTGTAGCGTTTCGTTTGTATTTGTGAATTATTGTCCAAATATTGACTAATTAGGCTCAAAAGATTCGTCTCGCAAAGTACAACAAAACTGTGCAATTAGTTTTTAATTTCATCTACATTTAGTACTCCATGCATGTACCGCAAGTTTGATGTGATGGGGAATCTTCTTTTTGCATAGTGTCAAAGTTGGGAGTTGGGAGTAACTAAACATGG	277
ba1580	DEL	Chr2	39689291	39689709	TTAGTCTACCGAGTTTTTTATTAGGACAACACCAACAGAGGACTCTCTTATATAAGAGCAACTCCAAGAGTACTCCAAAAAATTCTTCCCCAAAATTATGTATTGGGGGTTCTTTAAAAAAATTTCCCCCAAAAACATATCAATCCATAGCAGATCGCTAATAAATAGCTCCCAATATTTTAAAATAGGCCATGTCATCGTATTGGCCCATCGGAAGGGACACGCGAGCGTGCGGGAATCAGGATTGGGGGAGGAATGCCAACGCTAAAATATACGCGGTGGTAAGCTGTTTTTTAGCGTTGCTAAAAAATTGGGAAGGTTTGGGTGGACTATTGGAGTTCGTTTTTTCTTCTTTTTTCCTTAAAAAAAAGTATTGGGGTAAGATTAGCAGCCTCTTAA…	364
ba1582	DEL	Chr2	39705428	39705808	AGGGGCTAAATTTTAGCCCCTGTCACATCGGATGTTTGGACACTAATTAGGAGTATTAAACATAGTCTAATTACAAAACTAATTGCACAACCCCTAGGCTAAATCGCCACTTTGTTCAATAAAGCCAAATTAGTCCATGATTTGATAATGTGGTGCTACAGTAACCATTCGCTAATGATGGATTAATTAGGCTTAATAGATTCGTCTCGCGATTTAGCCTAGGGGTTCTGCTATTAGTTTTATAATTAGCTCATATTTAATCCTCCTAATTAGCATTCGAACGTGTGATGTGACAGGGCTAAAGTTTAGCCCGTGGCATCCAAACGCCCCCGAAGGAAACAATGGAAATCCAATCCAGTCGAACTGGAGTGCAGGATAAA	335
ba1583	DEL	Chr2	39712605	39713029	CAACTCCCAACTTTGACACTATGCAAAAAGAAGATTCCCCATCACATCAAACTTGCGGTACATGCATGGAGTACTAAATGTAGATGAAATTAAAAACTAATTGCACAGTTTTGTTGTACTTTGCGAGACGAATCTTTTGAGCCTAATTAGTCAATATTTGGACAATAATTCACAAATACAAACGAAACGCTACAGTGTGCTACAGTGCTGTAACAGTAATTTGGCACCTCCCAAATTCCCCAACTAAACACGGCCCGAATTTTTGCGAGCTCGAGCGGCCACGAGGAGAGGAGAAAGTGTGTGCGCAACTGTTGCGCTTTGAACTCTTTTCGGAGTTGCGCGGCGGAGAGGAGAGCACGAAGCCGAGAGTGTGTGGTTGGCGTGGCCCACGCGTTAGAC…	290
ba1586	DEL	Chr2	39802955	39803414	ACCATGAACCACATACACCTAGGGAGAAGCAGATTCCTGTCTGCTTGGGGCAATGGAACAGTGACTTCAATCTTGTTGTAGCTCTGCCAAAAGTGCAAGGAAGCCTGCATTTTCACTTGTGCTACTGCTAACTACTGTACATGTATAAACTTGTAGACTTGTGATAGTCCTGTCAACAGGGATGGTCATTTGGCTTGTCTGCTACAGGTTCTGTCGTGGATCTATGACTGCTAACTACTGTACATGTATAAACTTGTAGACTTGTGATAGTCCTGTCAACAGGGATGGTCATTTGGCTTGTCTGCTACAGGTTCTGTCGTGGATCTATGACTGACCAGTTGCAGCAACTGATTTCCTGCCCTAAGACTTGTTCCTGGCTGGTAGGATGAAAGTACCATG…	111
ba1587	DEL	Chr2	39847096	39847422	GTGTTAAAATTTAACACCCGTCACATCGGATGTTTGGATGCTAATTAGGAGTATTAAATATAGACTAATTACAAAATTAATTGCATAGATGGAGTGTAATTTGCGAGACGAATCTATTAAGCCTAATTAATCCATGATTTGACAATGTGGTGCTACAGTAACCATTTGCTAATGATGGATTAATTAGGCTTAATAGATTCGTCTCGCGAATTAGCACAGGGTTCTGCAATTAGTTTATAATTAGCTCATGTTTAGTTCTCCTAATTAGCATCCGAACATCCGATGTGACACTGTTAAAGTTTAGCACCTCGTATCCAAACACCCCC	349
pD3394	DEL	Chr2	39847582	39847863	TCCGGGCCATGTTTAGTTACTCCCAACTCCCAACTTTGACACTATGCAAAAAGAAGATTCCCCATCACATCAAACTTGCGGTACATGCATGGAGTACTAAATGTAGATGAAATTAAAAACTAATTGCACAGTTTTGTTGTACTTTGCGAGACGAATCTTTTGAGCCTAATTAGTCAATATTTGGACAATAATTCACAAATACAAACGAAACGCTACAGTGTGCTACAGTGCTGTAACAGTAATTTGACACCTCCCAAATTCCCCAACTAAACAAGGCCCCG	277
ba1593	DEL	Chr2	40228763	40229052	TGGTCTCTTGATTGAGGCCGTGTTTAGTTGGGGAATTTGGGAGGTGCCAAATTACTGTTACAGCACTGTAGCACACTGTAGCGTTTCGTTTGTATTTGTGAATTATTGTCCAAATATTGACTAATTAGGCTCAAAAGATTCGTCTCGCAAAGTACAACAAAACTGTGCAATTAGTTTTTAATTTCATCTACATTTAGTACTCCATGCATGTACCGCAAGTTTGATATGATGGGAAATCTTCTTTTTGCATAGTGTCAAAGTTGGGAGTTGGGAGTAACTAAACATGGCC	264
ba1595	DEL	Chr2	40275402	40275731	AGGTGCTAAATTTTAGCACCTGTCACATCAGATGTTTGGACACTAATTAGGAGTATTAAACATAGTCTAATTACAAAACTAATTGCACAACCCCTAGGCTAAATCGTGAGACGAATCTATTAAGCCTAACTAATCCATCATTAGAGAATGGGTACTGCAGCACCCCCTTGTCAAATCATGGACTAATTAGGCTTCATAGATTCGTCTCGGGATTTAGCCTAGGGGTTGTGCAATTAGTTTTGTAATTAGACTATGTTTAATACTCCTAATTAGTGTCAAACATCCGATGTGACAAGTGCTAAAATTTAGCACATGCCTCCCAAACACCT	353
ba1600	DEL	Chr2	40518588	40518847	TAAAGTTTAACCCGGGATCCAAACACCCCGCCAGTCTTTTTTTTCGTTCATGCATCAGTCAAGGATGTCGATCCTAGAACTGCGCATGCTGCAACTATTTCCTCTACGCACACCGCGTCCTCTTCACGGGGGGGGGGGGGGGGGGGGGGCGCTGCCTCCCGTACGGAAGCGAGGGCTACAGTAGCTGCGACGACTCCGAGGGCACTGACCTCTCGCAACTCGCACAGCGTGGGCGTACACCGGGTGCCAACTTCATGCA	162
ba1601	DEL	Chr2	40541364	40541693	AATTGAATTCCATCCTAATAATCATAATTTAGACACAAATTAATTAAGCTAATATAATTGTATGTGGAATATAGTTGCATATTATAGTTGGTGATATGGGAGAGATACTTGTATGCTGCACTTCTACTATAGAGAAGCGAATCTAAAAGCGTGCTATAAGAATTGAATTCCATTCTAATAACCATAATCTATAGAATCAATTTCCATCTCCCACCCCATGAATTTAAGATAGGCTTATATCTAAACTTTGGAAAGTTGTAGAATGCCACATTCCAACATAAATTAGCCTACTCCATTAAATAGATTCCAATTCCTTGGACCCAAACGGG	354
ba1602	DEL	Chr2	40651341	40651661	AACTTTAACACCCGTCACATCGGATGTTTGGATGCTAATTAGGAGTATTAAATATAGGCTAATTACAAAACTAATTGCACAGATGGAGTATAATTCACGAGACGAATCTATTAAGCCTAATTAGTCCATGATTTTGACAATGTGGTGCTACAGTAACCATTTGCTAATGATGGATTAATTAGGCTTAATAGATTCGTCTCGCGAATTAACACAGGGTTCTGCAATTAGTTTTATAATTAGCTCATGTTTAGTTCTCCTAATTATCATCCGAACATCCGATGTGACACTGTTAAAGTTTAACACCTCGTATCCAAACACCC	369
ba1604	DEL	Chr2	40661973	40662301	ATGTTAAACTTTAACAGTGTCACATCGGATGTTCGGATGCTAATTAGGAGAACTAAACATGAGCTAATTATAAAACTAATTGCAGAACCCTGTGCTAATTCGCGAGACGAATCTATTAAGCCTAATTAATCCATCATTAGCAATTGGTTACTGTAGCACCACATTGTCAAATCATGGACTAATTAGGTTTAATAGATTCGTCTCGTGAATTATACTCCATCTGTGCAATTAGTTTTGTAATTAGCCTATGTTTAATACTCCTAATTAGCATCCAAACATCCGATGTGACAGGTGTTAAACTTTAACACATGGTTGCCAAACAGGCCCT	343
ba1606	DEL	Chr2	40662445	40662775	GTGCTAAACTTTAACAGTGTCACATCGGATGTTCGGATGCTAATTAGGAGAACTAAACATGAGCTAATTATAAAACTAATTGCAGAACCCTGTGCTAATTCGCGTGACGAATCTATTAAGCCTAATTAATCCATCATTAGCAAATGGTTACTGTAGCACCACATTGTCAAATCATGGACTAATTAGGCTTAATAGATTCGTCTCACGAATTACACTCCATCTGTGCAATTAGTTTTGTAATTAGTCTATGTTTAATACTCCTAATTAGCATCCAAACATTCGATGTGACGGGTGTTAAACTTTAACACCATGGAGCCAAACAGGCCCTAA	347
ba1608	DEL	Chr2	40751216	40751554	GGGAACACCCTATTAAAGTTTAACACCTGTCACATCGAATGTTTGGATACTAATTAGGAGTACTAAACATAAGCTAATTACAAAACTAATTGCATAGATAGAGTATAATTCGCGAGACGAATCTATTAAGCCTAATTAGTCCATGATTTGACAATGTGGTGCTACAGTAACCATTTGCTAAAGATGGATTAATTAGCCTTTAATAGATTCGTCTCGCGAATTAGCACACAGTCTCTGCAATTAATGTTATAATTAGCTCATGTTTAGTTCTCCTAATTAGCATCCGAACATCCGATATGACACTGTTAAAGTTTAGCACCTCGTATCCCAAACAGCCC	352
pD3415	DEL	Chr2	40787370	40787724	ACTAAGGGGCTGTTTGGATATGAGGTGCTAAACTTTAACAGTGTCACATCGGATGTTCGGATGCTAATTAGGAGGACTAAACATGATCTAATTATAAAACTAATTGCAGAACCTTGTGCTAATTCGCGAGACGAATCTATTAAGCCTAATTAATCCATCATTAGCAAATGGTTACTGTAGCACCACATTGTCAAATCATGGACTAATTAGGCTTAATAGATTCGTCTTGCGAATTATACTCCATCTATGCAATTAGTTTTGTAATTAGTTTATATTTAGTACTCCTAATTAGCATCCAAACATCCGATGTGACAGGTGTTAAACTTTAACAGGGTGTTTCCAAACACCCCCTAA	349
ba1613	DEL	Chr2	41217838	41218151	GCCAGCCCAGCCAAGCCCAGCGCGTGGCTTAGCCTAACAAGTTCCACCCAAACTCCCAAATTTGACACTATGCAAAAAGAAGATTCCCCGTCATATCAAACTTGCGGTACATGTATGGAGTACTAAATGTAGACGAAATCAAAAACTAATTGCACATTTTTGTTGTACTTTGCGAGACGAATCTTTTGAGCCTAATTAGTCAATATTTGGACAATAATTCACAAATACAAACGAAACGCTACAGTGTGCTACAGTGCTACAACAGTAATTTTGGACATCCAAATTCAGGGCAACTAAACAAGGCTTAATTCCA	276
ba1616	DEL	Chr2	41326534	41326915	TTTTTCTCGCGTCCTTGATGCTTCACACGGAGATTTAGGTGGTGTTTGGTTCCCTTTGCTTATTTTTAGCACGTGTCACATCGAATGTTTAGATACTAATTAGGGGTATTAAACATAGACTATTTACAAAATCCATTACATAAGTGGAGGCTAAACGACGAGACGAATCTATTAAGCCTAATTAATCCATCATTAGCAAATGTTTACTGTAGCAACACATTGTCAAATCATGGACTAATTAGACTTAATAGATTCGTCTCGCCGTTTAGCCTCCACTTATGTAATCGGTTTTGTAAATAGTCTACGTTTAGTACTCCTAATTAATATCTAAACATTCGATGTGACGGGTGCTTAAATTTAAATCAGTGAACCAAACCAGGC	368
ba1617	DEL	Chr2	41381953	41382131	TCAATTTGAGAAACAATCAGAAATTTGTATACTCAGGCTTTTGGAACCAAGAATATGTGGTCTGTTCGTTTCAACTTATAAGTCGGCTGAAAAGCTGAAACAGCTGATTTGTTATGAGAGGAAAACACTGTTTGGTGGCTGATAAGCCGGCTGAATAAGCTGAAGCGAACAAGCCATG	118
ba1619	DEL	Chr2	41400982	41401378	ATACGAGGTACTAAACTTTAGGAGTGTCACATCGGACGTTCGGACCCTAATTAGGAGGACTAAACATGAGCTAATTATAAAACTAACTGCAGAACCCCTATACTAATTCGCGAGACGAATCTATTAAGTCTAATTAATCCATCATTAGCAACTGGTTACTGTAGCACTACATTGTCAAATTATGGACTAATTAGACTTAATAGATTCGTCTCGCGAATTAGATTCCATCTGTGCAATTAGTTTTGTAATTAGACTATATTTAATACTTCTAATTAGTATCCAAACATCCGATGTGACATGTCCTAAAGTTTACGAGGTGTTTCCCAAACACCCCTAGACGGCATTGGAGCCCTTTTTTCTGATGCTTTGTGAAATCTGCAATCCAGGGGCTCTGCC	352
ba1622	DEL	Chr2	41480139	41480318	GTGGCTTATCGGTGGAAATAAGCGAGAATCCCGTCAAACCCTTTGCTTATTTCCACCGATTATTGCTTATGTGGTAAGCCGCTTCAGAGATTTGAACTACGAGAAGCGAGAAGCGAGAAAATCTTTGCTTAGATTATAATCCAAGCGTCGCTAGAAGAAGCGTATCCAAACTGGACCTG	204
ba1624	DEL	Chr2	41507873	41508404	CAATAAACCTTTCGCCCGGATCTGCCGTTGTGGAATCTATTGCGCTGCACTGTCTGGTAACACAAGTTGCGTTATACAAACATAAGATGGCCGCAGGGCACTGGAACATGATATGTCATCAGTTTCTTCTTTTGAGTTGAAATGTTGCAGGCTGAAATCTTGAAATTTGAGGAGCTGCCAGAGAAAGGTTTTGAGTTCCAGAGATTATTCAAATATCTTGATAGTCGACTTGTTCGCTTCAGCTTATTCAGCCGGTTTATCAGCTACCAAACAATATTTTTCTCTCACAACAAATCAGCCGTTTCAGCTTTTCAGCCGGCTTATAAGCTGAAGCGAACAGGCTAGTGTTCCTGTTCCTTTTGACTTCTTTCACCTAAGGAGCGGCTGCAATGCTGCATG…	124
ba1625	DEL	Chr2	41521405	41521647	CATGCGTTCAGTTACTTATTACAAGGCAGAAAGGCAAAGGCCTGTTCGCTTCAGCTTATAAGCCGGCTGAAAAGCTGAAACGGCTGATTTGTTGTGAGAGAAAAATACTGTTTGGTGGCTGATAAGCCGGCTGAATAAGCTGAAGCGAACAGGCTGAAAGGATCCGAGTTGGATTGCCATAGAGAGCTCTCCTTTTCCTCTTTCGGCGCGGCGAGAACTCTTCGTAGTTTCCCAACCATGGA	124
ba1628	DEL	Chr2	41534006	41534345	CACGTTAGCGGTCTCATAGGTCGTCTCATGCAGTGTCATGTAGGATTTTTGATGATGTGGAGGAGAGAGAGCGAGGAGAGAGAAAAAGATCGTTGCTTCGCGAAACAACCACCTCATGAGCTAAATTGTAGGACTACGAGATAACTTAACCACCATTGTACGAGTTATTGTTGCCATGCAACTCATAATATTTTATTTTTCTTATGTACAAATTAAGGAATTATATACCACTACCAGACAACTTGTAGGACAACTCATTGTACATGTTACCTATTGAATCGTCTCAAGATTACGTGTCAATGCATGAGACCACCTATTAGACGACACCAATGTACTTGC	352
pD3477	DEL	Chr2	41581000	41581127	TGTGGGGCTTGTTCGCTTCAGCTTATTCAGCCGGCTTATCAGCCACCAAACAGTGTTTTCCTCTCACAACAAATCAGCCGTTTCAGCTTTTCAGCCGGCTTATAAGCTGAAGCGAACAGACCGGTGG	122
ba1638	DEL	Chr2	41663262	41663610	GGGGTGTTTGGAAGGAGGGGGCTAAATTTTAGCCCCCGTCACATCGAATGTTTGGACACTAAGTAGGAGTATTAAACCTAGATTAATTACAAAACTAATTACACAACCCCTAGGCTAAATCGCGAGACGAATCTATTAAGCCTAATTAGTGCATGATTTGACAATGTGGTGCTACAGTAACCATTCACTAATGATGGATTAATTAGGCTCAATAGATTCGTCTCGCGATTTAGCCTAGGGGTTCTGCAATTAGTTTTGTAATTAGCTTATGTTTAGTCCTCCTAATTAGTATCCGAACATCCGATGTGACAGGGCTAAAGTTTAGCCTCCTCCTTCCAAACACCCCCT	360
ba1639	DEL	Chr2	41715181	41715614	ATCTACTGGTAGTAGCGACCAGCAGGTCTTGTTGCGTGTCGGTGGCGCCTGCTACTGGGGGCCGGATCTGTCGGCGGCTGGCCGGAAGATCGATGCATCAAGCAAAAGCAAATGTGATCTGAGCCTGAACAGCCGAGGTTTTACACGAGCCAAGCGACCAAGGCCATGTTTAGTTACTCCCAACTCCCAACTTTGACACTATGCAAAAAGAAGATTCCCCATCACATCAAACTTGCGGTACATGCATGGAGTACTAAATGTAGATGAAATTCAAAACTAATTGCACAGTTTTGTTGTACTTTGCGAGACGAATCTTTTGAGCCTAATTAGTCAATATTTGGACAATAATTCACAAATACAAACAAAACGCTACAGTGTGCTACAGTGCTGTAACAGTAA…	270
ba1643	DEL	Chr2	41876784	41876928	AAAGGACTCAGAACACCGTTTCCGGGGGCGAATACACTTTGAATTTGATAAATGCATTGCTTGTGAAGTATGTGTTCGCGTATGCCCGATAGATCTACCTCTTGTGGATTGGAGATTTGAAAAGGATATTAAAAGGAAACAATG	131
ba1649	DEL	Chr2	42117160	42117374	TTTAGGACGCATATAGCTAATTAAAATTGCTTTTTTTTCCTGCAAAAATGCTAATTGTTGTTTTTTGTTTTCCAACAACATAATACCAATATATAGATACTCTGTAATCTTTATCCAACTGTGATAAATTCTGGTCATTATTACTACTTATTCTATGTGTTTTTCCATCCATATCCATCATTTTTCCATCTCCATCGCACTAAGGTATACCCTT	217
ba1659	DEL	Chr2	42551266	42551527	GAATTTGGGGGTGCTAAATTACTGTTACAGCACTGTAGCACACTGTAGCGTTTCGTTTGTATTTGTGAATTATTGTCCAAATATTGACTAATTAGGCTCAAAAGATTCGTCTCGCAAAGTACAACAAAACTGTGCAATTAGTTTTTAATTTCATCTACATTTAGTACTCCATGCATGTACCGCAAGTTTGATGTGATGGGGAATCTTCTTTTTGCATAGTGTCAAAGTTGGGAGTTGGGAGTAACTAAACATGGCCTTGGT	289
ba1666	DEL	Chr2	42860881	42861166	AGGTGCTAAACTTTAACAGTGTCACATCGGATGTTCGGATGCTAATTAGAAGGACTAAACATAAGCTAATTATAAAACTAATTGCAGAACCTTGTGCTAATTCGCGAGATGAATCTATTAAGCCTAATTAATCCATCATTAGCAAATGGTTACTGTAGCACCACATTGTCAAATCATGGACTAATTAGGCTTAATAGATTCGTCTCGCGAATTATACTCCATCTGTGCAATTAGTTTTATAATTAGCTTATATTTAGTACTCCTAATTAGCATCCAAACATCCGA	347
ba1667	DEL	Chr2	42955068	42955389	AAACTTTAACAGTGTCACATCGGATGTTCGGATGCTAATTAGGAGGACTAAATATGAGCTAATTATAAAACTAATTGCAGAACCTTGTGCTAATTCGCGAGACGAATCTATTAAGCCTAATTAATCCATCATTAGCAAATGGTTACTGTAGCACCACATTGTCAAATCATGGACTAATTAGGCTTAATAGATTCGTCTCGCGAATTATACTCCATCTGTGCAATTAGTTTTGTAATTAGCTTATGTTTAGTACTCCTAATTAGCATCCAAACATCTGATGTGACAGGTGTTAAACTTTAACAGGGGTTTCCCAAACACCCC	343
ba1670	DEL	Chr2	43442915	43443310	CGCTCTTCTTTTCTTAAGGACACGATTCCTTCACTTGAGAGCAACTTCAAGAGGCTGCTAATCTTACCCCCAATACCTTTTTTAGGAAAAAAAAGAGAAAAAATGAACTCCAACAATCCACCTAAACCTTCCCCAATTTTTTAGCGACGCTAAAAAACAGCCTGCCACCGCGTATATTTTAGCGTTGGCGTTCCTCCCCCAATCCCGATTCCCGCACGCCCGCGTGTCCCTTCCGATGGACCCAATACGATGACGTGGCCTGTGTTTGAAATATTGGGGGCTATTTATTAGCGATCTGTTGTGGACTAATATGTTTTTGGGGGAAATTTTTTTTAGGAGAACCCCCAATACATAGTTTTGGGGAAGAATTTTTTAGGATACTCTTGGAGTTGCTC	359
ba1671	DEL	Chr2	43456130	43456243	CCATAATAAGCAGTAGCAGCTGTTCAGCCAGCTTTTTTTTCTTTCAGCTCTCTCTATTTTTACTGTTCAAATAAGCGGCTGCAGCTTATTTGAAGCTCAGCCGAACACCCCAA	104
ba1673	DEL	Chr2	43459500	43459758	AGACTAACCGAACGAGGAACTTAGGGCCAGTTTGGCAGGGCTCCGGCTCCGGCTCCGGCTCCGTGCGCTTACCGAAGCACGGAGGAGCTGGAGCCGCACCAAACGGTATTGACCGCGGAGCCATTTTTTGGCACATTTGGGAGGAGCCGGAGCCGTTTTAGGCCTGCATGGAGGAGCCCAAAAAAGTGGCTCCGCGGCTCCGGCTCCGGCTCCGCATGAGGAGCCCCTCGCGAGGAGCCCTGCCAAAGGAGCCCTTAT	227
ba1676	DEL	Chr2	43508532	43508837	CCTGACCGTTTAGAAGAGAACATACGGCTCAACTTAGGTCTTGTTTAGTTCCTCCTTTTTTCCAACTTTAGCACTATGCAAAAAGAAGATTCCCATCACATCAAACTTGCGGTACATGCATGGAGTACTAAATGTAGACGAAATTAAAAACTAATTGCACAGTTTTATTGTACTTTGCGAGACGAATCTTTTGAGCCTAATTAGTCAATGTTTGGACAATAATTCACAAATACAAACGAAATACTACAATTGCGCATTTATGGCAAAATGCAAACTTTGCCACTTCCAATTTGGGAACTAAACAA	281
ba1679	DEL	Chr2	43529949	43530411	TGTCAAATAGGGAATTATCTCTTAATTGAGTTTCATTTAGGCCCCGTTTGGATCCAAGGAATTGGAATCTATTTAATGGAGTAGGCTAATTTATGTTGGAACGTGGCATTCCACAACTTTCCAAAGTTTAGATATAAGCCTATCTTAAATTCATGGGGTGGGAGATGGAAATTGATTCTATAGATTATGGTTATTAGAATGGAATTCAATTCTTATAGCACGCTCTTAGACTCGCTTCTCTATAGTAGAAGTGCAGCATACAAGTATCTCTCCCATATCACCAACTATAATATACAACTATATTCCACATACAATTATATTAGCTTAATTAATTTGTGTCTAAATTATGATTATTAGGATGGAATTCAATTCCAATGATCCAAACGGGGCCTTAGGGTA…	356
ba1682	DEL	Chr2	43749768	43749957	TGCCTCTGGCGAGAGCTGCAAGTCAGCTGCAACCCTGCAAGAGAGAGAACAGCGTGCGTGGTCAGGTGTTTCATGCGCGTGACGTGCTGCCAAAGCGATCCTTTTCTCATTCTGGCTGACTGCTAACCACCTTGGCTCCTGACTCCTCACTCAGCGTGCTGCACGATCAGATCATGATCATCCGCCGCC	126
pD3628	DEL	Chr2	43915687	43915841	CTTCACTAACAGCCCACTAGGGATTCTTGGGGAAATTGTTTCTTTTAAGAATTTGAGCCCAAAATGATTCAAGACTGATATTTTTTGTTTAATTTAAATCTTGTACATTGGGTGAGAGGAGTATCACTAACAACCTTCCGAAGACTTGCTTTCA	149
ba1692	DEL	Chr2	44066108	44066420	ACTAGCCCGAAGAGCTCCTTCGTTCCGTCGAGGCAAGCAAGATCGCAGCAGGGAGGGAGGGCAGGACCTAGCATCATCATCCGTGGACGGGCCCAGCAAAGCTGCATCCTCTGCCGTAGGCTGTAGCCTTTGCGAGAATCATACATCGATACACACATGCGTACGCGCGCGCCACACCGCCCACACGTTATCCTGGGCGGGGAACGCCCGCGTCTACTCTACACGCCGCCATGCCGGGGAGCGGTCACGGCATGTTGCTGGAATGATTGGTCGCCCTGGGGCCTGGAAAGCAGCGTCCATCGCGCCTGCCTC	150
ba1696	DEL	Chr2	44337883	44338224	GTTTGGCAGGGAGGGGCTAAATTTTAGCCCCTGTCACATCGGATGTTTGGACACTAATTAGGAGTATTAAACATAGTCTAATTACAAAACTAATTGCACAACCCCTAGGCTAAATCGCGAGACGAATCTATTAAGCCTAATTAGTCCATGATTTGACATGTGGTGCTACAGTAACCATTCGCTAATGATGGATTAATTAGGCTTAATAGATTCGTCTCGCGATTTAGCCTATGGGTTCTGCTATTAGTTTTTTAATTAGCTCATATTTAGTCCTCCTAATTAGCATCTGAACGTGTGATGTGACAGGGCTAAAGTTTAGCCCCTGACATCCAAACGCCCCC	347
ba1700	DEL	Chr2	44490715	44491055	TGTTTGGATACACCCCTATAAATTTTAGTACCCGTCACATCGGATGTTTGGATACTAATTAGGAGTATTAAATATAGTCTAATTACAAAACTAATTACACAGATGGAGTCTAATTCGCGAGACGAATCTATTAAGCCTAATTAGTCCATGATTTGACAATGTGGTGCTACAGTAACCATTTGCTAATGATGGATTAATTAGGCTTAATAGATTCGTCTCGCGAATTAGTATAGAGGTTCTGCAGTTATTTTTATAATTAGCTCATGTTTAGTCCTCCTAATTAGCATCCGAACATCCGATGTGACCCCTCCTAAAGTTTAGTACCCCGCATCCAAACACC	362
ba1701	DEL	Chr2	44509797	44510201	AACAAGAATCCAAAGTAAATCCAGAACTATCAAATCGTATGAACAATTCACTATCTTAGGGGGTGTTTGGGAAACCCCTGTTAAAGTTTAACACCTGTCACATCGGATGTTTGGATGCTAATTAGGAGTACTAAACATAAGCTAATTACAAAACTAATTGCACAGATGGAGTATAATTCGCGAGACGAATCTATTAAGCCTAATTAGTCCATGATTTGACAATGTGGTGCTACAGTAACCATTTGCTAATGATGGATTAATTAGGCTTAATAGATTCGTCTCGCGAATTAGCACAAGGTTCTGCAATTAGTTTTATAATTAGCTCATATTTAGTCCTCCTAATTAGCATCCGAACATCCGATGTGACACTGTTAAAGTTTAGCACCTCATATCCAAACA…	353
ba1703	DEL	Chr2	44598352	44598683	GATGCCACGGGCTAAACTTTAGCCCTGTCACATCACACGTTCGAATGCTAATTAGGAGGATTAAATATGAGCTAATTATAAAACTAATAGCAGAACCCCTAGGCTAAATCGCGAGACGAATCTATTAAGCCTAATTAATCCATCATTAGCGAATGGTTACTGTAGCACCACATTATCAAATCATGGACTAATTAGACTTAATAGATTCGTCTCGCGATTTAGCCTAGGGGTTGTGCAATTAGTTTTGTAATTAGACTATGTTTAATACTCCTAATTAGTGTCCAAACATCCGATGTGACAGGGGCTAAAATTTAGCCTCTCCTGTCCAAGA	357
ba1705	DEL	Chr2	44731109	44731469	GAGGAGGCTAAACTTTAGCCCTGTCACATCGGATGTTCGGATACTAATTAAGAGGACTAAACATAAGCTAATTACAAAACTAATTGCAGAACCCCTAGGCTAAATCGCGAGACGAATCTATTGAGCCTAATTAATCCATCATTAGTGAATGGTTACTGTAGCACCACATTGTCAAATCATGCACTAATTAGGCTTAATAGATTCGTCTCGCGATTTAGCCTAGGGGTTGTGTAATTAGTTTTGTAATTAATCTAAGTTTAATACTCCTAATTAGTGTCCAAACATTCGATGTGACGGGGGCTAAAATTTAGCCCCCTCCTCCCAAACACCCCCTTAAACCGTCGCAATAAATTGCTGCGA	351
ba1707	DEL	Chr2	45172378	45172721	GGGCTGTTTGGATACGAGGTGCTAAACTTTAACAGTGTCACGTCGGATGTTCGGATGCTAATTAGGAGGACTAAACATGAGCTAATTATAAAACTAATTGCAGAACCCTGTGCTAATTCGCTAGACGAATCTATTAAGCCTAATTAATCCATCATTAGCAAATGGTTACTGTAGCACCATATTGTCAAATCATGGACTAATTAGGTTTAGTTGATTCGTCTCGCGAATTATACTCCATCTGTGCAATTACTTTTTTAATTAGTCTATGTTTAATACTCCTAATTAGTATCAAACATCCGATGTGACAGGTGTTAAACTTTAACAGGGCGTTCCCAAACACCCC	355
pD3652	DEL	Chr2	45449725	45450080	TATAGGGGGTGTTTGGATACGAGGTGTTAAACTTTAACAGTGTCACATCGGATGTTCGGATGATAATTAGGAGAACTAAACATGAGCTAATTATAAAACTAATTGCAGAACCCTGTGTTAATTCGCGAGACGAATCTATTAAGCCTAATTAATCCATCATTAGCAAATGGTTACTGTAGCACCACATTGTCAAAATCATGGACTAATTAGGCTTAATAGATTCGTCTCGTGAATTATACTCCATCTGTGCAATTAGTTTTGTAATTAGCCTATATTTAATACTCCTAATTAGCATCCAAACATCCGATGTGACGGGTGTTAAAGTTTAACAGCTGGTTGCCAAACAGGCCCATAG	350
ba1717	DEL	Chr2	45697084	45697351	TTTGGGAGGTGCCAAATTACTGTTACAGCACTGTAGCACACTGTAGCGTTTCGTTTGTATTTGTGAATTATTGTCCAAATATTGACTAATTAGGCTCAAAAGATTCGTCTCGCAAAGTACAACAAAACTGTGCAATTAGTTTTTAATTTCATCTACATTTAGTACTCCATGCATGTACCGCAAGTTTGATGTGATGGGGAATCTTCTTTTTGCATAGTGTCAAAGTTGGGAGTTGGGAGTAACTAAACATGTCCCTAGATGGTATGG	273
ba1719	DEL	Chr2	45750250	45750599	TAGGGGGTGTTTGGGAAACACCTGTTAAAGTTTAACACCTGTCACATCGGATGTTTGGATGCTAATTAGGAGTACTAAACATAAGCTAATTACAAAACTAATTGCACAGATGGAGTATAATTCGCGAGACGAATCTATTAAGCCTAATTAGTCCATGATTTGACAATGTGGTGCTACAGTAACCATTTGCTAATGATGGATTAATTAGGCTTAATAGATTCGTCTCGCGAATTAGCACAAGGTTCTGCAATTAGTTTTATAATTAGCTCATGTTTAGTCCTCCTAATTAGCATCCAAACATCCGATGTGACACTGTTAAAGTTTAGCACCTCGTATCCAAACAGCCCCT	348
pD3664	DEL	Chr2	45905592	45905950	TTAGAGCACCTCCAGGAGTACCTAAAAAAATTCTTCCTCAAAACTATGTATTGGGGTTCTCCTAAAAAAATTTCCCCCAAAAACATATCAATCCACAGCAGATCGCTAATAAATTGCTCCAAATATTTCAAAACAGGCCACGTCATCGTATTGGGCCCATCAGAAGGGATGCACGGGCGTGCAGGAATCAGGATTGGGGGAGGAATACCAACGCTAAAATATACGCGGTGGCAGGCTGTTTTTTAGCGTCGCTAAAAAATTGGGGAAGGTTTAGGTGAACAGTTGGAGTTTGTTTTTTCTCTTTTTCTCCCTAAAAAAGATATTGGGGGTAAGATTAGCAACCTTTTGGAGTTGCTCT	356
ba1725	DEL	Chr2	46036918	46037373	TATCGTCCCAGCATATTGTTCGTGACATTCCTATATTTAAGATTCCTATAGGATTTCTTTTTTTTTGCACTCAAATCCTATGACTTTTCTATTTTTATGTTTTTGGGAATCCTGCATTCCAAAGACCCTAAAACACGAACTAAGTCCACTAGAATTTAAATGTGAGTGGGGGCATGTGCCCTCGACCCTAAGATTTTTATGTAAGACTTTGGAATGAAAGATTCAATTCTATCTATTTTAATTTTTTATGGAATCTAAAACTTCATGAGAATTTTATTGGAAAATAACCATGAGGTCCAAACTCATGTTTTCTTTTCTTTGTATTTCAGGATTTCTATATTCATCATGCCATCGTCCCATCAGATTGTTCGTGACATTCATACATTTAAGATTCTTGTA…	341
ba1726	DEL	Chr2	46046330	46046449	GTGCCTTTTAGAAATGCCCGGCGGGTTTTTGTCTTCTTTATAATCTTCTTAAATACCCTAGGTTTTTTTAATAGTAGAGGCAATCCTCAAGAGTTTTCTATAAGTAACAGATGCTTTTT	106
ba1729	DEL	Chr2	46216961	46217292	GCTAAAGTTTAGTCCGTGTCACATCGAATATTCGGATGCTAATTAGAAGGACTAAATATGAACTAATTACAAAACTAATTGCAGAACCCCTAGGCTAAATCGCGAGATGAATCTATTAAGCCTAATTAATCCATCATTAGCGAATATTTACTGTAGCATCATGTTGTCAAATCATGGACTAATTAGACTTAATAGATTCGTCTCGCGATTTAGCCTAGGGGTCGTGAAATTGGTTTTGTAATTAGCCTATGTTTAATACTCCTAATTAGTGTCCAAACATTCGACGTGACAGGAGCTAAAATTTAGCCCGGGGATCCAAACACCCCCTAAA	351
ba1735	DEL	Chr2	47720389	47720708	AAACTTTAACAGTGTCACATCGGATGTTCGGATGCTAATTAGAAGGACTAAACATGAGCTAATTATAAAACTAATTGCAGAACCTTGTGCTAATTCGCGAGACGAATCTATTAAGCCTAATTAATCCATCATTAGCAAATGGTTACTGTAGCACCACATTATCAAATCATGGACTAATTAGGCTTAATAGATTCGTCTCGCGAATTATACTCCATCTGTGCAATTAGTTTTGTAATTAGCTTATGTTTACTACTCCTAATTAGCATCCAAACATCCGATGTGACAGGTGTTAAACTTTAATAGGGTGTTCCCAAACACC	352
ba1738	DEL	Chr2	47911545	47911817	AGCCGTGTTTAGTTGGGGAATTTGGGAGGTGCCAAATTACTGTTACAGCACTGTAGCACACTGTAGCGTTTCGTTTGTATTTGTGAATTATTGTCCAAATATTGACTAATTAGGCTTAAAAGATTCGTCTCGCAAAGTACAACAAAACTGTGCAATTAGTTTTTAATTTCATCTACATTTAGTACTCCATGCATGTACCGCAAGTTTGATGTGATGGGGAATCTTCTTTTTGCATAGTGTCAAAGTTGGAAGTTGGGAGTAACTAAACATGG	275
ba1739	DEL	Chr2	47916754	47917089	GGGGGCTAAATTTTAGCCCCCGTCACATCGAATGTTTGGACACTAATTATGAATATTAAACCTAGACTAATTACAAAACTAATTACACAACCCCTAGGCTAAATCGCGAGACGAATCTATTAAGCTAATTTAGTCCATAATTTGACAATGTGGTGCTACAGTAACCATTCGCTAATGAGGGATTAATTAGGCTCAATAAATTCGTCTCGTGATTTAGCCTAGGGGTTCTGCTATTAGTTTTGTAATTAGCTCATATTTAGTCCTCCTAATTAGCATCCGAACATCCGATGTGATAGGACTAAAGTTTAGCCCCTGTCTCCCAAACACCCCCTTAG	354
ba1741	DEL	Chr2	47948239	47948568	CTATTAAAGTTTAACACCCGTCACATCGGATGTTTGGATGCTAATTAGAAGTATTAAATATAGACTAATTACAAAACTAATTGTACAGTTGGAGTGTAATTGGCGAGACGAATCTATTAAGCCTAATTAGTCCATGATTTGACAATGTGGTGCTACAGTAACCATTTGCTAATTGTGGATTAATTAGGCTTAATAGATTCGTCTCGCGAATTAGCACAGGGTTCTGCAATTAATTTTATAATTAGCTCATGTTTAATTCTTCTAATTAGCATCCGAACATCCGATGTGACACTGTTAAAGTTTAGCACCTCGTATCCAAACACCCCCTA	350
ba1742	DEL	Chr2	48030323	48030669	TTTTAGCACGTGTCACATCGAATGTTTAGATACTAATTAGGAGTAGTAAACGTAGACTATGTACAAAACCAATTACATAGGTGGAATCTAAACAGCGAGACGAATCTATTAAGCCTAATTAATCTATCATTAGCAAATATTTACTGTAGCAACACATTGTCAAATCATGGACTAATTAGGCTTAATAGATTCGTCTCGCCGTTTAGATTCGTCTTATGTAATGAGTTTTGTAAATAGTCTACGTTTAATACTTCTAATTAGTATCTAAACATTTGATGTGACGGGTGCTAAAGTTTAGCAAGTGGAAGAAAACAGGCCCTTAGACTTTAAGCAGCTTGGGCCAAGG	361
ba1744	DEL	Chr2	48075814	48076292	TCTCTTATCCAGGGAAAAGGAAGCAGTAAAACAGTTTTCAGCATGCTAGGTATGTGAGCATTGGTAGTAACTATCAACGAGACCATGCGAAAGCATCAACTCAGCTTAGCCAGCAATATGCAAGCAAAGTGTTCTGGAGGACTGCGGCTCAACTTAGCAACGGGACAAACCATATTTCGCATGCACAGGCCAAGTACGGAGGTATGCTCCATCTCCATGCCTTACATTTCCAGAAGAGACTGCTGAAGCTCATACAGGACACAAAACTAAACCCGTTCCTTGAATGAGCCATTTTCTGCATGCTTCATGTGATCAAATCTGATACTCTCCCACTGAACCTATATAAGGAAAACATACTGTTAAATTGTACAGTTCATCACAGCAGATATAACACAAATC…	101
ba1745	DEL	Chr2	48107981	48108444	CTCCCACGAAAAAAATCAAACACATTTGATTAGACGACGAACCAGTGGTAGAGAAACGAGCATTAGTCCCGGTTGGGAAACCTAATAGATCTCAATTTTCCTAACCGGAATTAATCATTCGGGACTAAGGGGGTGTTTACTTCCACCTTGCTAAATTTTAGTTGCTAAAGTTTAGCAACTTTTAGCTGCTAAACTGCCAAACACCCTTGCTAAAACTTTCTAAAGTTGAGTTGCTAAAGTTTAGCACTTTAGCAAGTTTTTGATTGCTAAAACTTGCTAAAAGGTGGGCTGGACAACATATACCCCTCATTTATTGCTTGTCTCCCCCCTCCTGCGCACCTTTAATAAGGGTAGATAGGTCCTTTTACAGCTCATTAAATGCCTTTTAGCAAGAGTATC…	356
ba1747	DEL	Chr2	48157246	48157496	CCCAACTTTGACACTATGCAAAAAGAAGATTCCCCATCACATCAAACTTGCGATACATGCATGGAGTACTAAATGTAGATGAAATCAAAAACTAATTGCACAGTTTTGTTGTACTTTGCGAGACGAATCTTTTGAGCCTAATTAGTCAATTTTTGGACAATAATTCACAAATACAAACGAAATGCTACAGTTGCGCATTTATGACAAACTCCCAACTTTGACACTCCCAAATTGGGAACTAAACAAGGCC	288
ba1750	DEL	Chr2	48228123	48228284	TGTTCGCTTCAGCTTATTCAGCCGGCTTATCAGCCACAAAACAGTGTTTTCCTCTCACAACAAATCAGCCGTTTCAGCTTTTCAGCCAGCTTATAAGTTGAAGCGAACAGGCCCATATTGATAACATTTCAAAAGTTCTTGTCCAGCTTTTTGATACTTGT	129
ba1751	DEL	Chr2	48231833	48232329	GCACAACTTTCAGAGCCCCTCACAATGCAATTATCATGATGGCACGAACGCAATTACACAACCATTCCAAGCTTTAGACTGAAGGACAGCGTCTCTTTCAGATCCACGATCCAACAGGTACAAAAGCTGCTACCGATCGCTAGAGAACTGGACACGAAGCAATGGTACGGTTGGCCGTCAGTAACTACGCTACACTGCTTTATCCAACAGATGCAAAGCCTGTCGGCTGAAAAACTGAAACGGCTGATTTGTTGTGAGAGAAAAATACTGTTCGGTGGCTGATAAGTCGGCTGATAAGCTGAAGCGAAGGCAACCAACTTCACGGGTCCTTGCGCCTCCAGCTCCATTATTGTACAGCTCCCTTCCCTGCGTTTCTATTGGGTGCGTGCATGCTTCCGG…	103
ba1753	DEL	Chr2	48333382	48333723	TGTTTGGATATGAGGTGCTAAACTTTAACAGTGTCACATCGGATGTTCGGATGTTAATTAGGAGGACTAAACATGATCTAATTATAAAACTAATTGCAGAACCTTGTGCTAATTCGCGAGACGAATCTATTAAGCCTAATTAATCCATCATTAGCAAATGGTTACTGTAGCACCACATTGTCAAATCATGGACTAATTAGGCTTAATAGATTCGTCTTGCGAATTATACTCCATCTATGCAATTAGTTTTGTAATTAGTTTATATTTAGTACTCCTAATTAGCATCCAAACATCCGATGTGACAGGTGTTAAACTTTAACAGGGTGTTTCCAAACACCCCC	353
ba1759	DEL	Chr2	48539125	48539382	GGAATTTGGGAGGTGCCAAATTACTGTTACAGTACTGTAGCACACTGTAGCGTTTCGTTTGTATTTGTGAATTATTGTCCAAATATTGACTAATTAGGCTCAAAAGATTCGTCTCGCAAAGTACAACAAAACTGTGCAATTAGTTTTTAATTTCATCTACATTTAGTACTCCATGCATGTACCGCAAGTTTGATGTGATGGGGAATCTTCTTTTTGCATAGTGTCAAAGTTGGGAGTTGGGAGTAACTAAACATGGC	287
ba1760	DEL	Chr2	48568012	48568445	AGCAAGACAGTACAGTAACCTACTAACCTAGGAATAGCTATGTGTGACAATGATGTTTTAGGGGGTGTTTGGGAGGAGGGGGCTAAATTTTAGCCCCCGTCACATCGAATGTTTGGACACTAATTATGAATATTAAACCTAGACTAATTACAAAACTAATTACACAACCCCTAGGCTAAATCGCGAGACGAATCTATTAAGCTAATTTAGTCCATAATTTGACAATGTGGTGCTACAGTAACCATTCGCTAATGAGGGATTAATTAGGCTCAATAAATTCGTCTCGTGATTTAGCCTAGGGGTTCTGCTATTAGTTTTGTAATTAGCTCATATTTAGTCCTCCTAATTAGCATCCGAACATCCGATGTGATAGGACTAAAGTTTAGCCCCTGTCTCCCA…	384
ba1762	DEL	Chr2	48881535	48881769	TTAGGGTGCGTTTGGTTGGTTGTATCATTTGATTCATGTATGAAATGATTCAAAATAATAATGATCCTTTTGTTTGGTTGGGTGAATTGAACCAACTCATCCAGGATGAGTCCATCCCACTTAATACATTATTCTACTAATTAGAGTGAACCATATGGTACAAGCAAATTGGTTGAACCATCCCATCCAGGATCATCCATACATGCATCATGTGGTGCATGCAACCAAACACAC	238
ba1766	DEL	Chr2	48943909	48944315	ATTGATGGTCAGGATCTTACTCCAATACCATATGGTCCAGCTACCGAGCCACCCCGCTTCAGGGGCTGTTTGGATACGAGGTGCTAAACTTTAACAGTGTCACATCGGATGTTTGGATGCTAATTAGGAGGACTAAACATGAGCTAATTATAAAACTAATTGCAGAACCTTGTGCTAATTCGCGAGACGAATCTATTAAGCCTAATTAATCCATCATTAGCAAATGGTTACTGTAGCACCACATTGTCAAATCATGGACTAATTAGGCTTAATAGATTCGTCTCGCGAATTATACTCCATCCGTGCAATTAGTTTTGTAATTAGCTTATGTTTAGTACTCCTAATTAGCATCCAAACATCCGATGTGACATGTGTTAAACTTTAACAGGTGTTTCCCAA…	349
ba1772	DEL	Chr3	153806	154074	TGATGGCCATCTTGGACCCTGTACATATAGTTCAAGAGAATTAGTTTAGTGAGATAAATCTCAAATGTGTACCTTGTAGATATTTATGCACTCACTGTTTCAGGTGGGCAAGAAATTATCAGAACTGATCCGCGATACCAGTGCCCAGACATCTGGGGGTGATAGTGGAAGATGGCAAGCTGAGCTGACCCAAGTGGCAATTGAACTAATTGGGGTAAGATCTTACGTCTTATGTGATTGTAGATATAACTTTTCCGTATTTAGAACC	125
ba1776	DEL	Chr3	393497	393617	CGAGAGAAAAACGGTAGCCAGGGGAAATCTTTGACCAGTTCACATCTGTTTATTATTAGGTTAACCCGCCCCCCCTCTTTTTTTTTCCCTTGCAAATTAAATTTGCAGTAGGATCGTAGC	146
ba1777	DEL	Chr3	394121	394251	GACGCAACAAGAGGCTTTGCTGTCTCATCTGTCAAACGGCCTGAACGCATATGCAAAGACAAAGGCAGACAAGATAGAAATATAATGTGGTTGTGACGAGCGAGGGGACAAACAAAACACTTATTCCTCC	106
ba1781	DEL	Chr3	519379	519619	TATTATTGGATTAACCTACCAGTAATACTAATAATGATCTGGAGTGTAGCACTAGCAGGGGATTTATCATGCATGGCTATCCGCTGCTACAAACATACCAAAGCAATTAATAAAATATATATTTGTATTATTGGATTAACCTACCAGTAATACTAATAATGATCTAACCAACAACAGGCATTTCGCTGTGGGCGAAGACTGGATGCATGGGCAATTGGCCATACCAAAGCATGTAGTACA	101
ba1783	DEL	Chr3	544279	544732	CCATTCTCCTTATTGCTAAGGGCCTGTTTGGCAACCAAGTGTTAAAATTTAACACCTGTCACATCGGATGTTTGGATGCTAATTAGGAGTATTAAATATAGGCTAATTACAAAACTAATTGCACAGATGAAGTGTAATTCACGAGACGAATCTATTAAGCCTAATTAGTCCATGATTTGACAATGTGGTGCTACAGTAACCAATTGCTAATGATGGATTAATTAGGCTTAATAGATTCGTCTCGCGGATTAGCACAGGGTTCTGCAATTAGTTTTATAATTAGCTCATATTTAGTTCTCCTAATTAGCATCCGAACATCCGATGTGACACTGTTAAAGTTTAACACCTCGTATCCAAACACCCCCTAAATCAAACCATCTAATCACCATCTTTTTTTTT…	353
pD3809	DEL	Chr3	756172	756541	ATTATCCCAACGGGAGTTTCATAGAGGTTTCATGCACATTAAATAAAGTGACATATCAGCATATGTGATAACATGGCATGGTAGTTATGAAGTGAGAGAGGGAAGGAGTTTCATCAGGATGAAACTGTGTATACACTGTTTCTAAGACTATAAAACCTATTGAAACTTGCATTGGGGACTATAGAGTTTCATTTCATCTAACCATATACAATCACATGCCTCACAATTAAATGTCATGAGCATCCTATGAAATCGTGAAATGAAACTGTGCACTGGGACTCCCTGTTTCATTCATGAGAATACACCTCATAGGATGATGTGGTATCCTTGGAAACAGTGCAATGAAACCTTGCATTGGGACTAGCCTTA	365
pD3829	DEL	Chr3	1220427	1220779	CTTAGGGGGTGTTTGGGAAACACCTGTTAAAGTTTAATACCTGTCACATCGGATGTTTGGATGTTAATTAGGAGTACTAAACATAAGCTAATTACAAAACTAATTGCACAGATGGAGTATAATTCGCGAGACGAATCTATTAAGCCTAATTAGTCCATGATTTGACAATGTGGTGCTACAGTAACCATTTGCTAATGATGGATTAATTAGGCTTAATAGATTCGTCTCGCGAATTAGCACAGGGTTCTGCAATTAGTTTTATAATTAGCTCATGTTTAATCCTCCTAATTAGCATCCGAACATCCGATGTGACACTGTTAAAGTTTAGCACCTCGTATCCAAACAGCCCCTA	351
ba1790	DEL	Chr3	1727387	1727622	CCATGTTTAGTTACTCCCAACTCCCAACTTTGACACTATGCAAAAAGAAGATTCCCCATCACATCAAACTTGCGGTACATGCATGGAGTACTAAATGTAGATGAAATTAAAAACTAATTGCACAGTTTTGTTGTACTTTGCGAGATGAATCTTTTGAGCCTAATTAGTCAATATTTGGACAATAATTCACAAATACAAACGAAACGCTACAGTGTGCTACAGTGCTGTAACAGTA	280
ba1791	DEL	Chr3	1950680	1951052	GGGGTGTTTGGGAACACCCTATTAAAATTTAACACCTGTCACATCGGATGTTTGGATGCTAATTAGGAGTACTAAACATAAGCTAATTACAAAACTAATTGCACAGATGGAGTATAATTCGCGAGACGAATCTATTAAGCCTAATTAGTCCATGATTTGACAATGTGGTGCTACAGTAACCATTTGCTAATGATGGATTAATTAGGCTTAATAGATTCGTCTCACAAATTAGCACAAGGTTCTGCAATTAGTTTTATAATTAGATCATGTTTAGTCCTCCTAATTAGCATCCGAACATCCGATGTGACACTGTTAAAGTTTAGCACCTCGTATCCAAACAGCCCCTCAGTGTTGCGATGCATCAACCCAAAA	349
ba1793	DEL	Chr3	2071971	2072420	ACCGTCAGGATAGGGATTTAACCAGGATTGGTGATGATGCAGCAGGAGGGCACCTTAGGTCCCGTTTGGATACACAATGCTAAACTTTAGCACAGTGCTAAACTTTAGCATCCTCAAATGGAGTGCTAAAGTTTAGCACTTGGGGTTGTTTGGATACAGTGCTAAAGTTTAGCACATTGGGTGAGAAATGACTACATTACCCTCATTTATGACTGGCTTGGGGAAAAGTGGAGAAGAGAGAGGGGGGCAGCAGGGGAAAAAATGGGCTTGGGACCACTTTTAGCACCCATTAGCACCTTTTAGCACCCCTTGGGTGTGCTAAAGAAAATGGGGGTGCTAAACTTTAGCACACCCCTTTTAGCACCCCTGTTTGGGAGCCCAAGTGCTAAAAGGTGCTAA…	389
ba1794	DEL	Chr3	2144099	2144478	GACCACGCGGCACGGCAGCCACAACGATGATGCTTGGGGGGTGTTTGGGAACACCCTATTAAAATTTAACACCTGTCACATCGGATGTTTGGATGCTAATTAGGAGTACTAAACATAAGCTAATTACAAAACTAATTGCACAGATGGAGTATAATTCGCGAGACGAATCTATTAAGCCTAATTAGTCCATGATTTGACAATGTGGTGCTACAGTAACCATTTGCTAATGATGGATTAATTAGGCTTAATAGATTCGTCTCACAAATTAGCACAAGGTTCTGCAATTAGTTTTATAATTAGATCATGTTTAGTCCTCCTAATTAGCATCCGAACATCCGATGTGACACTGTTAAAGTTTAGCACCTCGTATCCAAACAGC	350
ba1804	DEL	Chr3	2719799	2720132	GATACGAGGTGTTAAATTTTAACAGTGTCACATCGGATGTTCGGATGCTAATTAGGAGAACTAAACATGAGCTAATTATAAAACTAATTGCAGAACCCTGTGTTAATTCGCGAGATAAATCTATTAAGCCTAATTAATCCATCATTAGCAAATGGTTACTGTAGCACCACATTGTCAAATCATGGACTAATTAGGCTTAATAGATTCGTCTCGCGAATTATACTCCATCTGTGCAATTAGTTTTATAATTAGCCTATATTTAATACTCCTAATTAGCATCCAAACATCCGATGTGACGGGTGTTAAACTTTAATAGGTGGTTGCCAAACAGGC	358
ba1805	DEL	Chr3	2814967	2815338	TTCTTTGGACCTCCATGGATTCTATGGGGGTGTTTGGATACCAAGGGCTAAACTTTAGCCCTGTCACGTCGGATGTTCGGATGCTAATTAGGAGGATTAAACATGAGCTAATTACAAAACTAATAGCAGAACCCCTAGGCTAAATCACGAGACGAATCTATTAAGCCTAGTTAATCCATCATTAGCGAATGGTTACTGTAGCACCACATTGTTAAATCATGGACTAATTAGGCTTAATAGATTCGTCTCACGATTTAGCCTAGGGGTTGTGCAATTAGTTTTGTAATTAAACTACGTTTAATACTCCTAATTAGTATCCAAACATACGATGTGACAGGGGCTAAAATTTAGCCCCTGTCTTCCAAACACCC	344
ba1806	DEL	Chr3	2828608	2828881	TGTTTGGATACGAGGTGTTAAACTTTAACAGTGTCACATCGAATGTTCGGATGCTAATTAGGAGAACTAAATATGAGCTAATTATAAAACCAATTGCAGAACCCTATGCTAATTCGCGAGACGAATCTATTAAGCCTAATTAATCCATCATTAGCAAATGGTTACTGTAGCACCACATTATCAAATCATGTACTAATTAGGCTTAATAGATTCGTCTCGCGAATTACACTCCATCTGTGCAATTAGTTTTATAATTAGCCTATGTTTAATACT	350
ba1808	DEL	Chr3	2867136	2867499	CCATGCTTTTGGGGGCGTTTGGATGTCAGGGTCTAAACTTTAGCCCTGTCACATCACACGTTCAGATGCTAATTAGGAGGACTAAATATGAGCTAATTAAAAAACCAATAGCAGAACCCATAGGCTAAATCGCGAGACGAATCTATTAAGCCTAATTAATCCATCATTAGCGAATGGTTACTGTAGCACCACATTGTCAAATCATGGACTAATTAGGCTTAATAGATTCGTCTCGCGATTTAGCCTAGGGGTTGTGCAATTAGTTTTGTAATTAGACTATGTTTAATACTCCTAATTAGTGTCCAAACATCCGATGTGACAGGGGCTAAAATTTAGCCCCTCCCTGCCAAACACCCCCAAATT	365
ba1809	DEL	Chr3	2911386	2911642	AACTTCCAACTTTGACACTATGCAAAAAGAAGATTCCCCATCACATCAAACTTGCGGTACATGCATGGAGTACTAAATGTAGATGAAATTAAAAAGTAATTGCACAGTTTTGTTGTACTTTACGAGACGAATCTTTTGAGCCTAATTAGTCAATATTTGGACAATAATTCACAAATACAAACGAAACGCTACAGTGTGCTACAGTGCTGTAACAGTAATTTGGCACCTCCCAAATTGGCCAACTAAACAAGGCCTT	275
ba1810	DEL	Chr3	3009383	3009641	GGCGAATTTGGGAGGTGCCAAATTACTGTTACAGCACTGTAGCACACTGTAGCGTTTCGTTTGTATTTGTGAATTATTGTCCAAATATTGACTAATTAGGCTCAAAAGATTCGTCTCGCAAAGTACAACAAAACTGTGCAATTACTTTTTAATTTCATCTACATTTAGTACTCCATGCATGTACCGCAAGTTTGATGTGATGGGGAATCTTCTTTTTGCATAGTGTCAAAGTTGGAAGTTGGGAGTAACTAAACATGG	281
ba1812	DEL	Chr3	3065985	3066235	CTCCCAACTTTGACACTATGCAAAAAGAAGATTCCCCATCACATCAAACTTGCGGTACATGCATGGAGTACTAAATGTAGATGAAATTAAAAACTAATTGCACAGTTTTGTTGTACTTTGCGAGACGAATCTTTTGAGCCTAATTAGTCAATATTTGGACAATAATTCACAAATACAAACGAAACGCTACAGTGTGCTACAGTGCTGTAACAGTAATTTAGCACCCCCAAATTCGCCAAACTAAACACGG	279
ba1798	DEL	Chr3	3120735	3120958	GTGGCGCAGCGTGGCCGTTGCGCTGGCCGACATGCAATATGATGGATTAATTAGGCTTAATAGATTCGTCTCGCGATTTAGCCTAGGGGTTCTGCTATTAGTTTTATAATTAGCTCATATTTAATCCTCCTAATTAGCATCCGAACGTGTGATGTGACAGGGCTAAAGTTTAGCCCCTGGCATCCAAACGCCCCCAAATCTTTTGTCGCAGATTGAGACATTA	103
ba1813	DEL	Chr3	3243423	3243672	GGGAGGTGCCAAATTACTGTTACAGCACTGTAGCACACTGTAGCGTTTCGTTTGTATTTGTGAATTATTGTCCAAATATTGACTAATTAGGCTCAAAAGATTCGTCTCGCAAAGTACAACAAAACTGTGCAATTAGTTTTTAATTTCATCTACATTTAGTACTCCATGCATGTACCGCAAGTTTGATGTGATGGGGAATCTTCTTTTTGCATAGTGTCAAAGTTGGGAGTTGGAAGTAACTAAACATGG	275
ba1814	DEL	Chr3	3294100	3294247	ACTCTTAATGCTGTGTAAGTCAAAGTACACATATGTACGTACGTACGTATATATATACATATACATATACATATACATATACATATACATATACATATACATATACATATACATATACATATACATATACATATACATATACATATA	100
ba1815	DEL	Chr3	3358716	3359003	TCCTAGTGCCTTCTGAGGCCGTGTTTAGTTGGGGAATTTGGGAGGTGCCAAATTACTGTTACAGCACTGTAGCACACTGTAGCGTTTCGTTTGTATTTGTGAATTATTGTCCAAATATTGACTAATTAGGCTCAAAAGATTCGTCTCGCAAAGTACAACAAAACTGTGCAATTAGTTTTTAATTTCATCTACATTTAGTACTCCATGCATGTACCGCAAGTTTGATGTGATGGGGAATCTTCTTTTTGCATAGTGTCAAAGTTGGGAGTTGGGAGTAACTAAACATG	279
ba1816	DEL	Chr3	3376814	3377083	CATGTTTAGTTACTCCCAACTCCCAACTTTGACACTATGCAAAAAGAAGATTCCCCATCACATCAAACTTGCGGTACATGCATGGAGTACTAAATGTAGATGAAATTAAAAACTAATTGCACAGTTTTGTTGTACTTTGCGAGACGAATCTTTTGAGCCTAATTAGTCAATATTTGGACAATAATTCACAAATACAAACGAAACGCTACAGTGTGCTACAGTGCTGTAACAGTAATTTGGCACCTCCCAAATTCCCCAACTAAACACGG	283
ba1817	DEL	Chr3	3400995	3401256	GAATTTGGGAGGTGCCAAATTACTGTTACAGCACTGTAGCACACTGTAGCGTTTCGTTTGTATTTGTGAATTATTGTCCAAATATTGACTAATTAGGCTCAAAAGATTCGTCTCGCAAAGTACAACAAAACTGTGCAATTAGTTTTTAATTTCATCTACATTTAGTACTCCATGCATGTACCGCAAGTTTGATGTGATGGGGAATCTTCTTTTTGCATAGTGTCAAAGTTGGGAGTTGGGAGTAACTAAACATGGCCACAG	277
ba1824	DEL	Chr3	4103490	4103747	GTTGCCCAACTTGGGTGCACCCAAATTACTGTAGCAACACTGTAGCGTTTCGTTTGTATTTGTGAATTATTGTCCAAATATTGACTAATTAGGCTTAAAAGATTCGTCTCGCAAAGTACAACAAAATTGTGCAATTAGTTTTTGATTTCGTCTACGTTTAGTACTCCATGCATGTACCGCAAATTTGATGTGATGGGGAATCTTCTTTTTGCATAGTGCCAAAGTTGGGAGTTGGGGGTGAACTAAACATGGCCTAA	265
ba1826	DEL	Chr3	4418842	4419184	GTTTGGGTCAAGGGAATTGGAATCTATTTAATGGAGTAGGCTAATTTATGTTGGAATGTGGCATTCCACAACTTTCCAAAGTTTAGATATAAGCCTATCTTAAATTCATGGGGTGGGAGATGGAAATTGATTCTATAGATTATGGTTATTAGATGGAATTCAATTCTTATAGCACGCTCTTAGACTCGCTTCTCTATAGTAGAAGTGCAGCATACAAGTATCTCTCCCATATCACCAACTATAATATACAACTATATTCCACATACAATTATATTAGCTTAATTAATCTGTGTCTAAATTATGATTATTAGGATGGAATTCAATTCCATCGAAACAAACGGG	359
ba1827	DEL	Chr3	4429543	4429932	GGGAGGGGCTAAATTTTAGCCCCTGTCACATCGGATGTTTGGACACTAATTAGGAGTATTAAACATAGTCTAATTACAAAACTAATTGCACAACCCCTAGGCTAAATCGCGAGACGAATCTATTAAGCCTAATTAGTCCATGATTTGACAATGTGGTGCTACAGTAACCATTCGCTAATGATGGATTAATTAGGCTTAATAGATTCGTCTCGCGATTTAGCCTATGGGTTCTGCTATTAGTTTTTTAATTAGCTCATATTTAGTCCTCCTAATTAGCATCTGAACGTGTGATGTGACAGGGCTAAAGTTTAGCCCCTGACATCCAAACGCCCCCTAAGGCGCCAGATTTAGGCTCTGGTCCGAAAGGGCGTGGGTTCAAATCCCACAGC	358
ba1829	DEL	Chr3	4736819	4737114	GACCCCAAACACAGTTCATTTTAGGCCATGTTTAGTTACTCCCAACTTCCAACTTTGACACTATGCAAAAAGAAGATTCCCCATCACATCAAACTTGCGGTACATGTATGGAGTACTAAATGTAGATGAAATTAAAAAGTAATTGTACAGTTTTGTTGTACTTTACGAGACGAATCTTTTGAGCCTAATTAGTCAATATTTGGACAATAATTCACAAATACAAACGAAACGCTACAGTGTGCTACAGTGCTGTAACAGTAATTTGGCACCTCCAAAATTGGCCAACTAAACAAGG	276
ba1831	DEL	Chr3	5050435	5050846	TATTAGGCTAATCCTAGTGGGAGTGTGATGACATGGCATGGTAGTTATGAAGTGAGAGAGGGAAGGAGTTTCATCAGGATGAAACTGTGTATACACTGTTTCCAAAACTATGAAACCTATTGAAACTTGCATTGGGGACTATAGAGTTTCATTTCATCTAACCATATCCAATCACATGCCTCACAATTAAATGTCATGAGCATCCTATGAAATCGTGAAAGAAACTGTGCACTGGGACTCCTTGTTTCATTCATGAGAATACACTTCATGGGATGATGTGGCATCTTTAGAAACAGTGCAATGAAACCTTGCACTGGACTAGCCTTACTATTCTCCAAAACTTTGTTACCGTAACGGTATTGACAAACCTGCGCGATGACATATCCATTCAAAGATTTG…	319
pD3918	DEL	Chr3	5098230	5098568	GCTAAGGGCAAGTACATTGCTACACGTCAGCGGTCTCATAGGTCGTCTCATACAGTGCCACGTAGGATTTTTGATGATGTGGAGGAGAGAAAGCGAGGAGAGAGAAAGATGCCGTTGCTTCGCGAAACAACCACCTCATGAGCTAAATTGTAGGACTACGAGACAACTTAACAACCATTATACAAGTTATTGTTGCCATGCAACTCATAATATTTTATTTTTCTTATACACAAATTAAGGAATTATATACCACTACCAGACAACTTATAGGACAACTCATTGTACATGTTACCTGTTGAGACCGTCTATTAGACAACAACAATGTACTTGCCCCTAAG	332
ba1838	DEL	Chr3	5112498	5112844	TAATGGGATTATATGTTGGATAGATGAGCACTTTTAGATAAACCGGCAAAAGGAAGCTGCGCCCCCGCCGGATTATGGCGAACCATTCACGCAGGGGCCACGCACCCGCACCCTTCGCCCAGCGAGGCGAGATGAGCAAGTGCGCACGCATGTGGAACTCTCCTTCCCTCCCCACACACATAGCTTGAAGGAATGGAGACAACTTCCATATTTAAGTTGGTCATCCCTCCCCTCCACTAGCAATGTGGGACTAAAGACTTGCACCACTCCATCTCTTGCCCATATGGGCCTTTGAGATTTATTTAAAATTCTGAAATTACTTATGGGCTAGGGCCATTATTTCAAC	334
ba1839	DEL	Chr3	5135056	5135387	ACCCTGTTAAAGTTTAACACCTATCACATCGGATGTTTGGATGCTAATTAGGAGTATTAAACATAGGTTAATTACAAAACTAATTGCACAGATGGAGTATAATTCGCGAGACGAATCTATTAAGCCTAATTAGTCCATGATTTGACAATGTGGTGCTACAGTAACCATTTGCTAATGATGGATTAATTAGGCTTAATAGATTCGTCTCGCAAATTAGCACAGGGTTCTGCAATTAGTTTTATAATTAGCTCATGTTTAGTGCACCTAATTAGTATCCGAACATCCGATGTGACACTGTTAAAGTTTAACACCTCGTATCCAAACACCCCCT	344
ba1841	DEL	Chr3	5161537	5161888	AACTTTAGTACCTGTCACATCGGATGCTTGATACTAATTAAGAGTATTAAATATAGTCTAATTACAAAACTAATTGCACAGATGGAGTTTAATTCGCGAGACGAATCTATTAAGCCTAATTAGTCCATGATTTGACATTGTGGTGCTACAGTAACCATTTGCTAATGATGGATTAATTAGGCTTAATAGATTCGTATCGCGAATTAGTATAGGGATTCTGCAGTTAATTTTATAATTAGCTCATGTTTAATCCTCCTAATTAGCGTCCGAACATTCGATGTGACCCTTTTTAGTACCTCGTATCCAAACACCCCGTAATTAAATTAGAAATTCCCCGCTCGGGAGTCCCAC	341
ba1845	DEL	Chr3	5235758	5236183	ACGAGTGCAAGAAATATCTCACGCAATCATGTGGAAGTAAATTCATCGAGGGTTAGAAATCCATACACGCTCTCTTTAGGGTGTTTGGATACCCCATGTTAAAGTTTAGCACATGTCACATCGGATGTTTGGAAGCTAATTAGAAGTATTAAACATAGGCTAATTACAAAACTAATTGCACAGATGGAGTCTAATTCGCGAAACGAATCTATTAAGCCTAATTAGTCCATGATTTGACAATGTAGTGCTACAGTAACCATTTGCTAATGATGGATTAATTAGGCTTAATAGATTCGTCTCGCGAAATAGCATAGGGGTTCTGCAATTAGTTTTATAATTAGCTCATGTTTAGTCCTCCTAATTAGCATCCGAACATCCAATGTGACACTGCTAAAGTTT…	361
ba1854	DEL	Chr3	5512088	5512412	GTCCCTCCTAAAATTTCTGTCACATCGAATGTTTAGATACTAATTAGGAGTATTAAATATAAACTAATTACAAAACCAATTGCACAGATGGAGACTAATTTGCAAGACGAATCTTTTAAGCCTAATTAGTCCATGTTTTAACAATGTGATGCTACAGTAAACATGTGCTAATGATGGATTAATTAGGCTTAATAGATTCGTCTCGTGAATTAGCCTCCATCTGTGTAATTAGTTTCATAATTAGCTCATATTTAGTCCTTCTAATTAGCCTCCGAATATTTGATGTGACATGAATTTTAGGAGGTCCTAAATATGCAAACACCC	350
ba1855	DEL	Chr3	5529933	5530058	CAATCTAGACGATTGGTAAAACTTAAAAATCCACTACAGAGCATAAGAAAGCAGAGAGCAACATGTCATCAAATATAATCTGTTAGGAAGCTTGCACCTGAACATCAGACAATCTAGACGATTGG	106
ba1859	DEL	Chr3	5598822	5599335	TGGCTTCGTCAACAGATCTCTCTTGCCTCGGCCCTCTGTATGCTACCTAGATGCCACAAGTCCTGTTGGCCATGCCGCACGGCACGCCGGCTTTGCGGCGCGAAAACTCCCCGTGCGCATCCGCCAAGGCGGCAAGTCAGGGGGGGCCAGCGGGAGTGCGGGATCGAACCCAGGAGGAGCATGCAGGCCGCGTCCCGCTCGGCGTCCCACTAGGCCACCACCCCACCCAACCAGCAAGCATGACCGCGCCAATGATGGCGCCCTGCGCGCTCCCATTCGCCCACGTCTTGCTGCTTACCTGGCCTGCCGTCGCGTCACGCCCCCACTTCCACTCTCGGGCTCATCTCATTCCCATCTCTCTCGGTTAAGGTCCTAGAGGTGTTTGATCCACTGGCTAAA…	120
ba1860	DEL	Chr3	5612782	5613104	GGCCACTAGGTCCTTGTTTACTTCACCTCCAACTCCCAACTTTGGCACTATGCAAAAAGAAGATTCTCCATCACATCAAACTTGCGGTGCATGCATGGAGTACTAAATGTAGACGAAATTAAAAACTAATTGCACAGTTTTGTTATACTTTGCGAGACGAATCTTTTGAGCCTAATTAGTCAATGTTTGGACAATAATTCACAAATACAAATAAAACACTACAGTGTGCTACAGTGCTGTAACAGTAATTTAGCACCTCCCAACTTCAGCAACTAAACAAGGCCTGGGCCACCATCAACAGTGCCGGGCAGGCCTGAATCCC	279
ba1865	DEL	Chr3	5685518	5685853	TGAGTTTGTGCTATTCAGATTCACGGACCATGGACGATGCAACCTATATGGACTAGTATATCAACCTACGGTCCGGGTTAATTGCCTATACTTGTCTTCATAAATTTCAATTAATATGTATTTTAAAATGCTATTAATATTTTCTGTTATTTTTCAGAGAATTTGTTATGCACATTTTTTTCTTGAGTACATGTATGTATTCACCACCTAAAGTGATGCCACATGTATGCATTATATCCATTTTCAATTATCTTAAATGATACATAACTTAGACCAACCGCTGTATAATTCAGGACTGTCCTGCTTGTGTTATTTTACGTTGCCTCCCACTAGCA	324
pD4027	DEL	Chr3	5686833	5687131	ACTGGCATTATTGAGTGCCGGCTCGTAACCAAATACTGCGACACGATGTAAAATGTTGTGCACACCTAGAGGAAAGAGATGACATAATAAAGAGCGAAGTCCCCTTTATGTAAATAGTTTCCATTGCTTCTGTACTTATTAGCAGGCCATTATACATGTTTACAGCAAGTCAGAAACAGCAATTTCCATGCATCTAGTTTATTTTAACAATTTATCTTGTTGGAGAACGAAGAGCAGCTTATGTAATCTAGAAAATGTTAGTTAATACTATTTCGATATAGTTTTCGGATACCACCTG	297
ba1872	DEL	Chr3	5738452	5738573	TGGACCTGTTCGCTTCAGCTTATAAGCTGGCTGAAAAGCTGAAACGGCTGATTTGTTGTGAGAGAAAAACACTGTTTGGTGGCTGATAAGCCGAATGAATAAGCTGAAGCGAACAGGCCGT	120
ba1880	DEL	Chr3	5935323	5935610	GTATTTTGATCAATCAAAAGTCAAACTTTACAAACTTTGACTAACAATTAGTCAAATTATAAGCATATTTAGTATATAAATTTTGCATCAACATATTTGTACTTAAATTTATTTTGAGATGACATTGAGTTTTTAGTGATTGACATTATATTATAAGAGAAATTAAGAGTCAAAATCTACTTTGAAAGAATTTTCCCCAGTTCAAATGCGCCAATCATTTCTGGACGGAGGGAGTAGCAAGCTATGACCTTTAGCGTTTGGGTTTTTCTAAAAAAGCTATAGCCGGC	263
pD4093	DEL	Chr3	6069858	6070091	TTGTGCTCCGGTGAAACCATCCTGATCTCCATCTATGCCATGGGTAGAATGGAATCCCTGTGGGGCAAGGATTGCCATGTGTACCGTCCGGAGAGGTGGCTGTCCGAGGACGGTGCTAAACTGCGTTACGTGCCGTCCAATAAATTCATGGCGTTTAACACAGGGCCGAGGATGTGCCTTGGCAAGGACATAGCAATTGCGCAGATGAAGACCATCGTTGCCGCGGTGGTGTG	228
ba1889	DEL	Chr3	6237467	6238012	AGAATTTGACTCACCAAATAAACAAATGATCTCCTTTTGTGTTGTACAAAGAAAGAGGGTGAACATCAAACAAGACATTTACTTCTGATTTTCGTGCTAGCATTGCACTCAGGATATTTGTGCAGGCACAAGCTAAATCTACTGATTCACACTTACGTGTCTTCAATGTGATGCAAGTAGTTAGGTGAACAATTTGTTTCCGAGAACAAGATTGGGCCTGTTCGCTTTAGCTTATAAGCCGGCTGAAAAGCTGAAACGGTTGATTTTTTGTGAGAGGAAAACACTGTTTGGTGGCTGATAAGCCGGCTAAATAAGCTGAAGCGAACAGGCCGAATCATATATTCTGTTATATATCGTGCTATGTTCAAACAATGCTAAATCAGCATTACAGTTTCCTTT…	130
ba1890	DEL	Chr3	6246215	6246535	TCTATTTAATGGAGTAGGCTAATTTATGTTGGAATGTGGCATTCCACAACTTTCCAAAGTTTAGATATAAGCCTATCTTAAATTCATGGGGTGGGAGATGGAAATTGATTCTATAGATTATGGTTATTAGATGGAATTCAATTCTTATAGCACGCTCTTAGACTCGCTTCTCTATAGTAGAAGTGCAGCATACAAGTATCTCTCCCATATCACCAACTATAATATACAACTATATTCCACATACAATTATATTAGCTTAATTAATTTGTGTCTAAATTATGATTATTAGGATGGAATTCAATTCCAATGATCCAAACGGG	357
ba1891	DEL	Chr3	6375972	6376330	GCTGAGAGCAACTCCAAGAGTATCCTAAAAAATTCTTCCCCAAAACTATATATTGGGGGTTCTCCTAAAAAAAATTTCCCCCAAAAACATATCAGTCCACAGCAGATCGCTAATAAATAGCCCCCAATATTTCAAACACAGGCCACGTCATCGTATTGGGCCCATCGGAAGGGACGCGCGGGCGTGCGGGAATCAAGATTGGGGGAGGAACGTCAACGCTAAAATATACGCGGTGGCAGACTGTTTTTTAGCGTCGCTAAAAAATTGGGAAAGGTTTAGGTGGATTGTTGGAGTTTATTTTTTCTTTTTTTTTTCCTAAAAATGGTATTGGGGTAAGATTAGCAGCCTCTTGGAGTTG	361
ba1898	DEL	Chr3	6748237	6748569	CCCTGCTAAACTTTAGCACCTGTCACATCGGATGTTTGGATGCTAATTAGGAGTATTAAACATAGGCTAATTATAAAACTAATTGCACAGATGGAGTCTAATTCGCGAGACGAATCTATTAAGCCTAATTAGTCCATGATTTGACAATGTGGTGCTACAGTAACCATTGCTAATGATGGATTAATTAGGCTTAATAGATTCGTCTCGCGAATTAGCACAGTGGTTCTGCAATTAGTTTTATAATTAGCTCATGTTTAGTCCTCCTAATTAGTATCCGAACATCCGATGTGACACTGCTAAAGTTTAGCACCAGGTATCCAAACAACCCCTTA	351
ba1899	DEL	Chr3	6759788	6760152	ATTTGGGAGGTGCCAAATTACTGTTACAGCACTGTAGCACACTGTAGCGTTTCGTTTGTATTTGTGAATTATTGTCCAAATATTGACTAATTAGGCTTAAAAGATTCGTCTCGCAAAGTACAACAAAACTGTGCAATTAGTTTTTAATTTCATCTACATTTAGTACTCCATGCATGTACCGCAAGTTTGATGTGATAGGGAATCTTCTTTTTGCATAGTGTCAAAGTTGGGAGTTGGGAGTAACTAAACATGGCCCGTCTCCCGTTTCCAAAAGCTGCCTCATCGAGTTAATTTGTAATTTTTTATAAGTTGATGGTTTCAAAATATTGTATGAATACTAGATTAAGGAACTATTTATACTAAT	268
ba1900	DEL	Chr3	6788065	6788418	AGTATAAGGGGGTGTTTGGATACGAGATGTTAAACTTTAACAGTGTCACATCGAATGTTCGGATGCTAATTAGGAGAACTAAACATGAGCTAATTATAAAACCAATTGCAGAACCATGTGCTAATTCGCGAGACGAATCTATTAAGCATAATTAATCCATCATTAGCAATTGGTTACTGTAGCACCACATTGTCAAATCATGGACTAATTAGGTTTAATAGATTCGTCTCGTGAATTACACTCCATCTGTGCAATTAGTTTTGTAATTAGCCTATGTTTAATACTCCTAATTAGCATCCAAACATCTGATGTGACAGGTGTTAAACTTTAACACATGGTTGCCAAACAGGCCC	361
pD4199	DEL	Chr3	6808533	6808670	TTGGTTACGGTGTTGAACTTTTCATGTGCTAATGGTTACTATGTTGAACTTTTCATGTGTTGATGGTTTCTTCCTACTGCTACTTTTCATGTGCTACTGCTTATGAACCTTGCTGCTACTGCTACTGATTGCTGCTG	134
ba1908	DEL	Chr3	6820284	6820608	CTGTGAGCATATATGCTCCAGGCTCCACCGGCGTGGTAAACAAAACAATGTCGGCGAACTTAGCCCTTGTTTACTTCACCCCCAACTCCCAACTTTAGCACTATGCAAAAAGAAGATTCCCCATCACATCAAACTTGCGGTACATGCATGGAGTACTAAATGTAGATGAAATTAAAAACTAATTGCACAGTTTTATTGTACTTTGCGAGACGAATCTTTTGAGCCTAATTAGTTAATGTTTGGACAATAATTCACAAATACAAACGAAACGCTACAGTATGCTACAGTGCCAGTGCCAGTACAGTAATTTGGCACCTCCCAGGC	267
ba1910	DEL	Chr3	6850966	6851189	GCTGCTAATCTTACCCCCAATACCTTTTTTAGGAAAAAAGAGAGAAAAAATGAACTCCAACAATCCACCTAAACCTTCCCCAATTTTTTAGCGACGCTAAAAAACAGCCTGCCACCGCGTATATTTTAGCGTTGGCGTTCCTCCCCCAATCCTGATTCCCGCATACCCGCGCGTCCCTTCCGATGGGCCCAATACGATGACGTGGCCTGTGTTTGAAATATTG	358
ba1911	DEL	Chr3	6923193	6923558	CTAGAGAGAAGAGAGATCTTCACATTGGGGGTGTTTGGCAACACCCTGTTAAAGTTTAACACCTGTCACATCGGATGTTTAGATGCTAATTAGGAGTATTAAACATAGGCTAATTACAAAACTAATTGCACAGATGGAGTATAATTCGCGAGACGAATCTATTAAGCCTAATTAGTCCATGATTTGACAGTGTGGTGCTACAGTAACCATTTGCTAATGATGAATTAATTAGGCTTAATAGATTCGTCTCGCGAATTAGGACAGGGTTCTGCAATTAGTTTTATAATTAGCTCATGTTTAGTCCTCCTAATTAGCATCCGAACATCCGATGTGACACTGTTAAAGTTTAGCACCTCGTATCCAAA	313
ba1912	DEL	Chr3	6969280	6969693	TTGCCTACTCATCATTTCAGTTTCAAACTTGCGGTTCATGAAGAAAATGAAAATGTTGATCCGGCAGAACTTAAAAGGTGAAAGAGAGACGCTGGCTAGCCCGGTGGCCGAGGGGAACGGGGGGAAAGGGTTGCGGACCCTAATTATACTCGTTCTTTGGGAAATCTGGCTAGAGAGAAATCGGAGGGTCTTCCAACACAAACACAAGACGGTTACCCAGATAACCGACAGCATCAAGAACCAAGCTGTGATGTGGGTTGCTGCGGGAGCTAAACACTTGGGGGACTTTCTCTCAGGTTGAGTGTCCTGTTTTGTACTAGTTTCATAAGCGGAGTTCTGCCTCCCCATTTCGGGGATGCGAGTGTACAGCTTGTATAGTACGTTTGTATTCAGCCCGTC…	387
ba1915	DEL	Chr3	6986278	6986498	AGGTAGTATTGTACGTAGTAAGGATCTTTTGGACCTGAGACTAGTGGGCCTGTTCGCTTCAGCTTATAAGCCGACTGAAAAGTTAAAATAGCTGATTTATTGTGAGAGAAAAATACTGTTTGGTGGTGGCTGATAAGTCAGCTGAATAAGCTGAAGCGAACTGGTCGGCGAACAAGTCCAGTGTGATTCTGCGGCCCTGCCGCCGTTCTGCAAACAAAAC	143
ba1919	DEL	Chr3	7023171	7023509	TGGTTTGGTTCCATTTGCTTATTTTTAAGCAAGTGTCACATCAATGTTTAGATACTAATTAGGAGTATTAAACGTAGACTATTTACAAAATCCATTACATAAGTGGAGGCTAAACGGCGAGACGAATCTATTAAGCCTAATTAGTCCATGATTTGACAATGTGTTGCTACAGTAAACATTTGCTAATGATGGATTAATTAGGCTTAATAGGTTCGTCTCGCTGTTTAGCCTCCACTTATGTAATGGGTTTTGTAAATAGCCTACGTTTAATACTCCTAATTAGTATCTAAACATTGATGTGACACCTGCTTAAAAATAAGCAAAGGAACCAAACGCCC	352
pD4230	DEL	Chr3	7180509	7180639	CTTTGGGCATCAGTCTCAGTCTCGACCACAGTATTCCCATGCCACACTCAATGGCTGTCCTGCTAACACCTCCAAGACATGCCATCACTTCTGCTTGCACAGTTTTCAGAACATATTCAAGACGTCGTTT	126
ba1922	DEL	Chr3	7197489	7197823	GATAAGCTTATTTTGGTACGCGTTGAACTAGCGGACGAACGCACCGCCGAAATTTGCTAAGGCCGTGTTTAGTTGGGGAATTTGGGAGGTGCCAAATTACTGTTACAGCACTGTAGCACACTGTAGCGTTTCGTTTGTATTTGTGAATTATTATCCAAATATTGACTAATTAGGCTCAAAAGATTCGTCTCGCAAAGTACAACAAAACTGTGCAATTAGTTTTTAATTTCATCTACATTTAGTACTCCATACATGTACCGCAAGTTTGATGTGATGGGGAATCTTCTTTTTGCATAGTGTCAAAGTTGGGAGTTGGGAGTAACTAAACATGGCC	278
ba1924	DEL	Chr3	7292074	7292558	AGGGGGCGTTTTCTTCCTGTGTCTTATTTTTAGCACGTGTCACATCGAATGTTTAGATACTAATTAGGAGTATTAAACGTAGACTATTTACAAAACCAATTACATAAGTGGAATCTAAACGGCGAGACGAATCTATTAAGCCTAATTAAGCCTAATTAATCCATCATTAGCAAATGTTTACTGTAGCAACACATTGTCAAATCATGGACTAATTAGGCTTAATAGATTCGTCTTGCTGTTTAGATTCGTCTTATGTAATGGGTTTTGTAAATAGTCTGCGTTTAATACTACTAATTAGTATCTAAACATTCGATGTGACGGGTGCTAAAAATAAGTCAGTGGAGGAAAACGGGACCTTATTGTTTGGAACATGTCGCTACGTAATGTGAAAGCATTTGA…	355
ba1925	DEL	Chr3	7320719	7321108	CGTTTGGGTCCAAGGAATTGGAATCTATTTAATGGAGTAGGCTAATTTATGTTGGAATGTGGCATTCCACAACTTTCCAAAGTTTAGATATAAGCCTATCTTAAATTCATGGGGTGGGAGATGGAAATTGATTCTATAGATTATGGTTATTAGATGGAATTCAATTCTTATAGCACGCTCTTACACTCGCTTCTCTATAGTAGAAGTGCAGCATACAAGTATCTCTCCCATATCACCAACTATAATATACAACTATATTCCACATACAATTATATTAGCTTAATTAATTTGTGTCTAAATTATGATTATTAGGATGGAATTCAATTCCAATGATCCAAACGGGGCCTCAGATTCTTTTCGTGGAGCCTACCTACTGATTCTAATTTTAT	364
ba1927	DEL	Chr3	7347440	7347949	ATCCCTTAATCTCTAATATAAGTAATCAATTTATCATTAGGATCTCCAACGAGTCACATACCATTGATATTTAAATGATTTAAACTGTGTGATGAGTAATAATGAAAATTGCTATTTAGGTAATAAATTTACTGTATTGTGACCGAAAACATATAACATATCTATACAGGGGCGGATCCAGGGCCCGGGCTGCCCGGGCTGCAGCCCGGGGCGAGCCCGTGTAGTCCCTTTAACATATGTGGTGTTTAACTAAAAAACTATGATCTCAATTAGAGAAAAGGAGGCTCAGGAGGCGTGAATCAACAACTTAGCCCGGGACGCAGCCTCGTTCTGTATCTGCCCCTGTATCTATACCTACATGGATTAAAAAAAATACGCAACTGCGTTCGTAGGTTTTTA…	183
ba1929	DEL	Chr3	7349529	7349856	TGCTTATTTTTAGCACATGTCACGTCGAATGTTTAGATACTAATTAGGAGTATTAAACGTAGACTATTTACAAAACTCATTACATAAGTGGAGGCTAAACGGCGAGACGAATCTATTAAGCCTAATTAATCCATCATTAGCAATGTTTACTGTAGCAACATATTATCAAATCATACTCCCAATGAAACTATTGGATTCGTCTCGCTGTATAGCCTCCACTTATGTAAGAGGTTTTGTAAATAGTTTACGTTTAATACTCCTAATTAGTATCTAAACATTCGATGTGATGGGTGCTGAAAATAAGCAAGAGGAACCAAACCAGGCCTA	338
ba1933	DEL	Chr3	7373588	7373975	CTAAAAAATTCTTCCCCAAAACTATGTATTGGGGTTTTTCTAAAAAAAATTTCCCCTAAAAATATATCAGTCCACAGCATATCGCTAATAAATAGCCCCCAATATTTCAAACACAGGCCACATCATCGTATTGGGCCCATCGGAAGGGACGCGCGGGCGTGCGGGAATCAGGATTGGGGGAGGAACGCCAACGCTAAAATATACGCGGTGGCAAGTTATTTTTTAGCGTCGCTAAAAAATTGGGAAAGGTTTAGGTGGATTGTTGGAGTTCATTTTTTCTCTCCTTTTTCCTAAAAAAAGGTATTGGGGTAATATTAGTAGCCTCTTGGAGTTGCTCTAAGCTTCTTGCAAAAAAAAAATGATCGTGTAAGCTTCTTGGATGACCAA	356
ba1934	DEL	Chr3	7376821	7377151	TTTAGTCGCTCCTAAAATTTCTGTCACATCGAATGTTTAGATACTAATTAGGAGTATTAAATATAGACTAATTACAAAACTAATTGCACAGATGGAGACTAATTGGCGAGACGAATCTATTAAGCCTAATTAGTTCATGATTTGACAATGTGATGCTACAGTAAACATGTGCTAATGATGGATTAATTAGGCTTAATAGATTCGTCTCGTGAATTAGCCTCCATCTGTGTAATTAGTTTTATAATTAGCTCATATTTAGTCCTCCTAATTAGCCTCCAAATATTCGATGTGACATAAATTTTAGGAGGTCCTAAAGATCCAAACACCCCC	350
ba1935	DEL	Chr3	7385161	7385568	AGGCTGGGCAAACCTTGCCCAGCTAGCTTAGGGGGCGTTTGTTTCTTTAGCACCTTTTAAAATTCATGTCACATCGAATGTTTAGATACTAATTAGGAGTATTAAATATAGGCTAACTACAAAACTAATTACACGGACAGAGACTAATTTGCGAGACGAATCTATTAAGTCTAATTAGTCCATGATTTGACAATGTGATGCTACAGCAAACATGTGCTAATGATGGATTAATTAGGTTTAATAGATTCGTCTCATGAATTAGCCTCCATCTGTGTAATTAGTTTTATAATTAGTTCATATTTAATCCTCCTAATTAGCCTTCGAATATTCGATGTGACATAAATTTTAGTCAGTACTAAAGATCCAAACACCCCTAAAGCTAGCAAAGGATCCAAGCAG…	345
ba1937	DEL	Chr3	7393041	7393392	ATTTGAGGAACTCCAAAAGGCTGCTAATCTTACCCTCAATACTCTTTTTAGGGAAAAAGAAGAAAAAACGAACTCCAACAGTCCACTCAAACCTTCCCCAATTTTTTAGCAACGCTAAAAAATAACCTACCACCGCGTATATTTTAGCGTTAGCATTCCTCCTCCAATCCTGATTCTCGCACGCTCGCGCGTCCCTTCCGATGGGCCCAATACGATGACGTGACCTGTTTTAAAATATTGGGGGCTATTTATTAGCAATCTGCTGTGGATTGATATATTTTGGGGAAATTTTTTTTTGGAAGAACCTCCAATATATAGTTTTGGGGAAGAATTTTTTGGAGTACTCTCTAT	345
ba1940	DEL	Chr3	7418185	7418303	TCGCTTCAGCTTATAAGCCGGCTGAAAAGCTGAAACGGCTGATTTGTTGTGAGAGAAAAATACTGTTTGATGGCTGATAAGCCGGCTGAACAAGCTGAAACGAACAGGTCCGTAGCTG	116
ba1941	DEL	Chr3	7448616	7448893	CGTGCAGCCGTGCACGGCTGTTTTCACGGATAAAAGTTTAGTTACTATCACAATACTAATTAACAATACTAATTAAAAGCATTAAATATAAATTAATTATAAAATTAATTGTATAAATGAAAGCAAATTTGTAAGATGAATCTATTAAATCTAATTAGTTTATGATTTAATCTTGTGATCCTATGGTAAAAATGTGCTAATTATGAATTAATTAGATTTAATAGATTTGTCTCACGAATTAGCCAGATTTATACAATTAGTTTTATAATTAATTCAC	156
ba1942	DEL	Chr3	7449759	7449904	AGCCGGCTGAAAAGCTGAAACGGCTGATTTGTTGTGAGAGAAAAATACTGTTTGATGGCTGATAAGCCGGCTGAATAAGCAGAAGCGAACAGGCCGAACATTTGCAACATCAAAAATCTATCGTTGCAACATTGAAAAATATGCG	124
ba1949	DEL	Chr3	7474222	7474346	CAGCCTGTTCGCTTCAGCTTCAGCTTATTCAGCAAGTTTATCAGCCACCAAACAGTATTTTTCTCTCATAATAAATCAGCCGTTTCGGCTTTTCAGCCGGCTTATAAGCTGAAGCGAACAGGTC	128
ba1952	DEL	Chr3	7557302	7557540	TTTTCTAAATACATAATTTTTTATATGCACCTAGACATACACGCATGTCTACATGCATATTAGAAGCTATGTATTAAAAAAACTAAAACGAATAATAATTTGGAACATCCTAAATTACTATTCATTTTGACTTTTCTAAATACATAATTTTTTATATGCACCTAGACATACACGCATGTCTACATGCATATTAGAAGCTATGTATTAAAAAAGCTAAAACGAATAATAATTTGGGACG	133
ba1953	DEL	Chr3	7574440	7574714	TTACTTCCCAAGTTGGGAGTTGCAAAATTGACATTTTGCCATAAATGCGACACTGTAGCATTTCATTTGTATTTGTGAATTATTGTCCAAATATTGACTAATTAGGCTCAAAAGATTCGTCTCGCAAAGTACAACAAAATTGTGCAATTAGTTTTTGATTTCGTCTACATTTAGTACTCCATACATGTACTGCAAGTTTGATGTGATGGGAAATCTTCTTTTTGCATAGTGTCAAAGTTGGGAGTTTGGAGGGAAGTAAACAAGGACTTCAACG	280
ba1958	DEL	Chr3	7611310	7611441	AGCGACCGTGGAGGCTATACGTCGCATATGCGACACATAGTAGTACAATTCAACAAAAAGCAACGACACACGTGCTTCCCACCACGAGAGAAGAGGGAGACCAGACAGAGAGAGCGACCGTGGAGGCTATA	113
ba1960	DEL	Chr3	7616961	7617223	TACTTCCCAACTTCCAACTTTGACACTATGCAAAAAGAAGATTCCCCATCACATCAAACTTGCGGTACATGCATGGAGTACTAAATGTAGATGAAATTAAAAAGTAATTGCACAGTTTTGTTGTACTTTACGAGACGAATCTTTTGAGCCTAATTAGTCAATATTTGGACAATAATTCACAAATACAAACGAAACGCTACAGTGTGCTACAGTGCTGTAACAGTAATTTGGCACCTCCCAAATTGGCCAACTAAACAAGGCC	281
ba1967	DEL	Chr3	8151148	8151443	CCCCCAACTTCCAACTTTGACACTATGCAAAAAGAAGATTCCCCATCACATCAAACTTGCGGTACATGTATGGAGTACTAAATGTAGATGAAATTAAAAATCAATTGCACAGTTTTGTTGTACTTTGCGAGACGAATCTTTTGAGCCTAATTAGTCAATATTTGGACAATAATTCACAAATACAAACGAAGTGCTATAGTGTGCTACAGTGCTGGAACAGGAATTTTGCATCTCCAAAATTGACCAACTAAACAAGGCCCAAAATCCGAAAGCGTTTGACCGCGGCGGCACGTGC	271
ba1969	DEL	Chr3	8211537	8211773	AACTTTTACACTATGCAAAAAGAAGATTCCCCATCACATCAAACTTGCGGTACATGCATGGAGTACTAAATGTAGACGAAATTAAAAACTAATTGCACAGTTTTGTTGTACTTTGCGAGACGAATCTTTTGAGCCTAATTAGTCAATATTTGGACAGTAATTCACAAATACAAACGAAATGCTACAGTGTTGCTACAGTAATTTGGCACCTCCCAAATTCGCGAAGTAAACAAGGG	266
pD4332	DEL	Chr3	8216074	8216358	ACCTAGGCCTTGTTTAGTTTCACCAAAACTCCCAATTTTAACACTATGCAAAAAGAAGATTTCCCGTCACATCAAACTTGTGGTACATGCATGAAGTACTAAATGTAGACGAAATTAAAAACTAATTCCACAGTTTTGTTGTACTTTGCGAGACGAATCTTTTGAGCCTAATTAGTCAATATTTGGACAATAATTCACAAATACAAACGAAACGCTACAGTGTGCAACAGTGCTACAACAGTAATTTTGGACACCCAAATTCAGGGCAACTAAACAAGGCCCTA	279
ba1973	DEL	Chr3	8312003	8312330	GGAGCTAAAGTTTAGTTTGTGTCACATCAGATATTCGGATGCTAATTAGGAGGACTAAACATTAGCTAATTACAAAACTAATTGCAGAACCCCTAGGCTAAATCGCGAGATGAATCTATTAAGCCTAATTAATCCATCATTAGTGAATGTTTACTGTAGCACCATATTGTCAAATCATGGACTAATTAGGCTTAATAGATTCATCTCGCGATTTAGCCTAGGGGTTGTGAAATTGGTTTTGTAATTAGCCTATGTTTAATACTCCTAATTAGTGTCCAAATATTCGACGTGACAGGGACTAAAATTTAGCTCGGGATCCAAACACCC	355
ba1974	DEL	Chr3	8313898	8314219	TACTCCAGCTCTCTGTCCGTCCGTCCGTTCTCCTCGGCACCTAGGCCATGTTTAGTTACTCCCAACTCCCAACTTTGACACTATGCAAAAAGAAGATTCCCCATCACATCAAACTTGCGGTACATGCATGGAGTACTAAATGTAGATGAAATTAAAAACTAATTGCACAGTTTTGTTGTACTTTGCAAGACGAATCTTTTGAGCCTAATTAGTCAATATTTGGACAATAATTCACAAATACAAACGAAACGCTACAGTGTGCTACAGTGCTGTAACAGTAATTTGGCACCTCCCAAATTCCCCAACTAAACAAGGCCCTAG	285
ba1975	DEL	Chr3	8345997	8346182	AGTCTCTTACTGCCCTGGGCAGGGGTGTGCAACTGAGTTAGGACTAGACGAACAGTGATGTAACGCCGAGGCCGACGGGCACGCCATCGAGTTTAATTTCTCTATATGCCAACAATGTGGTGATTTTCTTGTCCCAATAGCAACAAGACCACCATGGTAGCGCCAATTAGGTGCTGGAACGTCAA	196
ba1976	DEL	Chr3	8348218	8348410	GAGAAACATACTCCCTCCGTTTCAAATTGTAGATCATTTTAGTTTTTTTAAATTCATAGACATTATTATGCATTTAGATATAGTGTATGTCTAGGTGCATAATAATATCTATGAACCTAGAAAAGTCTAGGTGCATAATAATATCTATGAACCTAGAAAAGTCAAAACGACCTACAATTAGGAACGGAGGAA	182
ba1978	DEL	Chr3	8378529	8378834	CCAACTTTGGCACTATGCAAAAAGAAAATTCCCCATCACATCAAACTTGCGGTACATGTATGGAGTACTAAATGTAGATGAAATTAAAAACTAATTGCACAGTTTTGTTGTACTTTGCGAGACGAATCTTTTGAGTCTAATTAGTCAATGTTTGGACAATAATTCACAAATACAAACGAAACGCTACAGTGTTGCTACATTAATTTGGCGCCTCCCACATTCCCCAAGTAAACAAGGGCCATGATCAGACGGGAGGGGGCAGTCACCAACCATTGCGCATCTTGGTCCAATCATTTTCTACTCTG	271
ba1984	DEL	Chr3	8422775	8423148	ATTCGAAGTTGTGTTCACTAAGGCCCCGTTTGGGTCCAAGGAATTGGAATCTATTTAATGGAGTATGCTAATTTATGTTGGAATGTGGCATTCCACAACTTTCCAAAGTTTAGATATAAGTCTATCTTAAATTCATGGGGTGGGAGATGGAAATTGATTCTATAGATTATGGTTATTAGAATGGAATTCAATTCTTATAGCACGCTCTTAGACTCGCTTCTCTATGGTAGAAGTGCAGCATACAAGTATCTCTCCCATATCACCAACTATAATATACAACTATATTCCACATACAATTATATTAGCTTAATTAATTTGTGTCTAAATTATAATTATTAGGATGGAATTCAATTCCAATGATCCAAACGGGGCC	351
pD4371	DEL	Chr3	8423531	8423813	TGTAGGCCGTGTTTAGTTGGGGAATTTGGGAGGTGCCAAATTACTGTTACAGCACTGTAGCACACTGTAGCGTTTCGTTTGTATTTGTGAATTATTGTCCAAATATTGACTAATTAGGCTCAAAAGATTCGTCTCGCAAAGTACAACAAAACTGTGCAATTAGTTTTTAATTTCATCTACATGTAGTACTCCATGCATGTACCGCAAGTTTGATGTGATGGGGAATCTTCTTTTTGCATAGTGTCAAAGTTGGGAGTTGGGAGTAACTAAACATGGCCGTAG	277
ba1990	DEL	Chr3	8431448	8431946	ATCGAGAGATGCCGCTGGCCCGACGGTAGCGGAGGCTCCGAAATACATGACACGAGGTTTAGAACAAACCATTTAGTTTATTTTTGAATTAAATAGTTTATCTTTAAACATCATATATCCATGTACGGGAATAGTACAAACATCAAAGGGTGCAGAACAACGGGGTGTTTGGGAGGAGGGGGCTAAACTTTAGCCCTGTCACATCGGATGTTCGGATACTAATTAGGAGGACTAAACATAAGCTAATTACAAAACTAATTGCAGAACTCCTAGGCTAAATCGCGAGACGAATTTATTAAACCTAATTAATCCATCATTAGCGAATAGTTACTGTAGCACCATATTGTCAAATCATGGACTAATTAGGCTTAATAGATTCGTCTCGCGATTTAGCCTAGG…	353
ba1993	DEL	Chr3	8484756	8485151	TTTGGATGTCAGGGGCTAAACTTTAGCCCTGTCACATCACACGTTCAGATGCTAATTAGGAGGACTAAATATGAGCTAATTAAAAAACTAATAGCAGAACCCATAGGCTAAATCGCGAGACGAATCTATTAAGCCTAATTAATCCATCATTAGCGAATGGTTACTGTAGCACCACATTGTCAAATCATGGACTAATTAGGCTTAATAGATTCGTCTCGCGATTTAGCCTAGGGGTTGTGCAATTAGTTTTGTAATTAGACTATGTTTAATACTCCTAATTAGTGTCCAAACATCCGATGTGACAGGGGCTAAAATTTAGCCCCTCCCTGCCAAACACCCCCATATAGATCCTTGAGATGGACTGATAGAGCACAACTGAATCTGGAGGCAGTGTG	305
ba1995	DEL	Chr3	8494881	8495128	TTTCATGGAGACAAAATTAGGTTCATGTAGACATTATGGTTTTAGAACTGAATACATGGATTCAGGGGCGGATCCAGAACGGGGCTGCGCCCCGAGCTGAGCTGTTGAATCACACCTAAAATAGTCTAATTTTGTCTCCTAAGCCTCATTTTGTTAGGCTAAACAACACATAGGTTAAAGGGACTCCATGGTCTCGCCCCGGGCTGCAGCCAGGGCAGCCCGGGCCCTGGATCCGCCCCTGCATGGA	187
ba1998	DEL	Chr3	8549717	8550016	TGAAATCAAAATCGAGAACCCTTATTGGGCCATGTTTAGTTACTCCCAACTCCCAACTTTGACACTATGCAAAAAGAAGATTCCCCATCACATCAAACTTGCGGTACATGCATGGAGTACTAAATGTAGATGAAATTAAAAACTAATTGCACAGTTTTGTTGTACTTTGCGAGACGAATCTTTTGAGCCTAATTAGTCAATATTTGGACAATAATTCACAAATACAAACGAAACGCTACAGTGTGCTACAGTGCTGTAACAGTAATTTGGCACCTCCCAAATTCCCCAACTAAACAAGG	273
pD4396	DEL	Chr3	8614842	8615156	ACTATGATGTGATCACGCTTCGTACATCATTCCATATAATGTGAGAACATTTCGATTGAACTAAACTACACCTGATATGCTAAGATTTTTGTGTTGGATCAAGAACATGCCCCGCTAAGACGATGGCACCGGACTCTTCTTCCACCACGAAGAAGATGAATGGATGATCTGCAACGAAGTCGACAGATACCGACTGACGCTTCGTCCGTTGCACCGTCGGCGACAGGCCTTCCTCACCCACCTCGAAAACCGCCTTGTGCAGGATGTCCGATAGGAACAGCGGCTCGTGCGATCCGTCGAGCTCTAACATGTCT	311
ba2005	DEL	Chr3	8707827	8708258	TATATTTAGTCCTCTAATTAGGGGCTGTTTGGATACGAGGTGCTAAACTTTAACAGTGTCATATCGGATGTTCGGATGCTAATTAGGAGAACTAAACATGAGCTAATTATAAAATTAATTGCAGAACCTTGTGCTAATTCGCGAGACGAATCTATTAAGCCTAATTAATCCATCATTAGCAAATGGTTACTGTAGCACCATATTGTCAAATCATGGACTAATTAGGCTTAATAGATTCGTCTCGCGAATTATACTCTATCTATGCAATTAGTTTTGTAATTAGCTTATGTTTAGTACTCCTAATTAGTATCCAAACATTCGATGTGACAGGTGTTAAATTTTAATAGGGTGTTCCCAAACACCCCCTTAGTCTCTGAATATTTAATGTAACACGGGCTC…	344
ba2009	DEL	Chr3	8772512	8772834	GTTAAAATTTAACACCCGTCACATCGGATGTTTGGATGCTAATTAGGAGTATTAAATATAGACTAATTACAAAATTAATTGCATAGATGGAGTGTAATTTGCGAGACGAATCTATTAAGCCTAATTAATCCATGATTTGACAATGTGGTGCTACAGTAACCATTTGCTAATGATGGATTAATTAGGCTTAATAGATTCGTCTCGCGAATTAGCACAGGGTTCTGCAATTAGTTTATAATTAGCTCATGTTTAGTTCTCCTAATTAGCATCCGAACATCCGATGTGACACTGTTAAAGTTTAGCACCTCGTATCCAAACACCC	349
ba2011	DEL	Chr3	8820558	8820995	TTTCGGACGGACACTATGGGGGTGTTTGGGAAACACCTGTTAAAGTTTAACACATGTCACATCGGATGTTTGGATGCTAATTCGGAGCAGTAAACATAAGCTAATTACAAAACTAATTGCACAGCCGGAGTATAATTCGCGAGACGAATCTATTAAGCCTAATTAGTCCATGATTTGACAATGTGGTGCTACAGTAACCATTTGCTAATGATGGATTAATTAGGCTTAATAGATTCGTCTCGCGAATTAGCACAAGGTTCTGCAATTAGTTTTATAATTAGCTTATGTTTAGTCCTCCTAATTAGCATCCAAACATCCGATGTGACACTGTTAAAGTTTAGCACCTCGTATCCAAACAGCCCCTATATAAGGGCGCCATTTTTTTTTAAAAAAAAACGC…	341
ba2015	DEL	Chr3	9058550	9058770	GATGGAAGAAGAACGACAACTAGTGAGTTCATCGGCGTGTTCGCTGCAGCTTATTCAACCGGTTTATCAGCCACCAAACAGTATTTTCTCTCACAACAAATCAGCCGTTTCAGCTTTTCAGCCAGCTTATAAGCTGAAGCGAACAGGCTGCATGAGTTCAGGTAAAAATTCCATGACCGGGTAGGGAGGCAAAATTCCCAAGTGGAGTAGCCAATTTTTT	126
ba2016	DEL	Chr3	9064301	9064565	AGTTACTCCCAACTCCCAACTTTGACACTATGCAAAAAGAAGATTCCCCATCACATCAAACTTGCGGTACATGCATGGAGTACTAAATGTAGATGAAATTAAAAACTAATTGCACAGTTTTGTTGTACTTTGCGAGACGAATCTTTTGAGCCTAATTAGTCAATATTTGGACAATAATTCACAAATACAAACGAAACGCTACAGTGTGCTACAGTGCTGTAACAGTAATTTGGCACCTCCCAAATTCCCTAACTAAACAAGGCC	286
ba2019	DEL	Chr3	9469416	9469712	GGCTGTCGGATTAAACGGGAAACAGACAGTTCGCCGAGTGCCTGGGGCCAGAAAACCCTCGGCGAAACGTTTGCCGAGTGTAACACTCGGCAAACGACACACGGCAAAATCTTGACGGCAAACACTGGTTCGCCGAGTGTTTTGTGTCGGGCACTCGGCAAAGACTTTGCCGAGTGCCCAGAAAACACTCGGCGAACAATTATTGAAAAAATAAAAAAAAATCATGCACCGCCACCTACTCCGCCGCCGCGGGGCGGTTTTTGACGTCGACGTGACGGATCGCGTCGCCTTGCCGC	224
pD4448	DEL	Chr3	10216343	10216698	ACTAAGTGGGTGTTTGGATACGAGGTGTTAAACTTTAATAGTGTCACATCGGATGTTCGGATGCTAATTAGGAGAACTAAACATGAGCTAATTATAAAACTAATTGCAGAACCCTGTGCTAATTCGCGAGACGAATCTATTAAGCCTAATTAATCCATCATTAGCAAATGGTTACTGTAGCACCACATTGTCAAATCATGGACTAATTAGGCTTAATAGATTCGTCTCGTGAATTACACTCCATCTGTGCAATTAGTTTTGTAATTAGCCTATGTTTAATACTCCTAATTAGCATCCAAACATCCGATGTGACAGGTGTTAAACTTTAACACATGGTTGCCAAACAGGCCCTAAG	349
ba2029	DEL	Chr3	10481654	10481769	TTCCACTGACTTATTTTTAGTACCCGTCACATCGAATGTTTAGATACTAATTATTAGTATCTAAACATTCGATGTGACACGTGCTAAAAATAAGTCACTGGAAGAAAACACCCCC	136
ba2034	DEL	Chr3	11377253	11377508	GCCAATTTGGGAGGTGCCAAATTACTGTTACAGCACTGTAGCACACTGTAGCGTTTCGTTTGTATTTGTGAATTATTGTCCAAATATTGACTAATTAGGCTCAAAAGATTCGTCTCGTAAAGTACAACAAAACTGTGCAATTACTTTTTAATTTCATCTACATTTAGTACTCCATGCATGTACCGCAAGTTTGATGTGATGGGGAATCTTCTTTTTGCATAGTGTCAAAGTTGGAAGTTGGGAGTAACTAAACAT	281
ba2036	DEL	Chr3	11413921	11414250	AGGTGTTAAACTTTAACAGTGTCACATCGGATGTTCGGATGCTAATTAGGAGAACTAAATATGAGCTAATTATAAAACTAATTGCAGAACCCTGTGCTAATCCGCGAGACGAATCTATTAAGCCTAATTAATCCATCATTAGCAATTGGTTACTGTAGCACCACATTGTCAAATCATGGACTAATTAGGCTTAATAGATTCGTCTCGTGAATTACACTTCATCTGTGCAATTAGTTTTGTAATTAGCCTATATTTAATACTCCTAATTAGCATCCAAACATCCGATGTGACAGGTGTTAAATTTTAACACTTGGTTGCCAAACAGGCCC	358
ba2041	DEL	Chr3	11534605	11534965	GCTAAATTTTAGCACCCCCATTTTAGTCACTTTTAGCCACTAGTGCTCCCAAACACCTAGGCTAAAATGGAGGGGCTAAATTTTAGCCCCCCATAATCCATTAGCCCCTCAAGAGGTGCTAAAATGGACTAAAGGGGCTAAAAGTGGTCCCCTTATCCAAAATTCCTCCCCTTGCCCCTCTCTCTCTCCTCCCTCTCACTCCTCCAACATGGGTAAATAGGTCTTTTGTCAACATAAGTGCTAAACTTTAGCCCCTTACCCAAACACCCCAAGGGCTAAACTTTAGCCTCAACATTTGAGAGGGCTAAAGTTTAGCCCAAGGCTAAATTTTAGCCCCTCCTCCCAAACAAGGCCTTCATC	380
ba2051	DEL	Chr3	12926228	12926547	CCATGTTTAGTTACTCCCAACTCCCAACTTTAACACTATGCAAAAAGAAGATTCCCCATCACATCAAACTTGCGGTACATGCATGGAGTACTAAATGTAGATGAAATTAAAAACTAATTGCACAGTTTTGTTGTACTTTGCGAGACGAATCTTTTGAGCCTAATTAGTCAATATTTGGACAATAATTTACAAATACAAACGAAACGCTACAGTGTGCTACAGTACTGTAACAGTAATTTGGCACCTCCCAAATTCCCCAACTAAACACGGCCTTACTCTGCCGGGCTCTGCGAGGGCTTTCGGTTTTGGCCTCTGTGCT	285
ba2052	DEL	Chr3	12928790	12929132	GTTTGGATACGAGGTGCTAAACTTTAACAGTGTCACATCGGATGTTTGGATGCTAATTAGGAGGACTAAACATGAGCTAATTATAAAACTAATTGCAGAACCTTGTGCTAATTCGCGAGACGAATCTATTAAGCCTAATTAATCCATCATTAGCAAATGGTTACTGTAGCACCACATTGTCAAATCATGGACTAATTAGGCTTAATAGATTCGTCTCGCGAATTATACTCCATCTGTGCAATTAGTTTTGTAATTAGCTTATGTTTAGTACTCCTAATTAGCATCCAAACATCCGATGTGACAGGTGTTAAACTTTAACAGGTGTTTCCCAAACACCCCCTA	348
ba2053	DEL	Chr3	12931735	12932002	TTGGGAGGTGCCAAATTACTGTTACAGCACTGTAGCACACTGTAGCGTTTCGTTTGTATTTGTAAATTATTATCCAAATATTGACTAATTAGGCTCAAAAGATTCGTCTCGCAAAGTACAACAAAACTGTGCAATTAGTTTTTAATTTCGTCTACATTTAGTACTCCATGCATGTACCGCAAGTTTGATGTGATGGGGAATCTTCTTTTTGCATAGTGTCAAAGTTGGGAGTTGGAGGATAACTAAACATGGCCTAAATGCTGGCGT	277
ba2054	DEL	Chr3	12961086	12961375	TATTAAAGTTTAACACCTGTCACATCGGATGTTTGGATGCTAATTAGGAGTAGTAAACATAAGCTAATTACAAAACTAATTGCACAGATGGAGTATAATTCGCGAGACGAATCTATTAAGCCTAATTAGTCCATGATTTGATAATGTGGTGCTACAGTAACCATTTGCTAATGATGGATTAATTAGGCTTAATAGATTCGTCTCGCGAATTAGCACAAGGTTCTGCAATTAGTTTTATAATTAGCTCATGTTTAGTCCTTCTAATTAGCATCCGAACATCCGATGTGAC	348
ba2055	DEL	Chr3	12963605	12963923	ACTTTAACAGTGTCATATCGGATGTTCGGATGCTAATTAGGAGAACTAAACATGAGCTAATTATAAAATTAATTGCAGAACCTTGTGCTAATTCGCGAGACGAATCTATTAAGCCTAATTAATCCATCATTAGCAAATGGTTACTGTAGCACCATATTGTCAAATCATGGACTAATTAGGCTTAATAGATTCGTCTCGCGAATTATACTCTATCTATGCAATTAGTTTTGTAATTAGCTTATGTTTAGTACTCCTAATTAGTATCCAAACATTCGATGTGACAGGTGTTAAACTTTAATAGGGTGTTCCCAAACACCC	354
ba2067	DEL	Chr3	13695273	13695614	TCCGCTTGCTAAACTTTAGCACCTGTCACATCGAATGTTTAGATACTAATTAGGAGTATTAAATGTAGACTATTTACAAAACCCATTACATAAGACGAATCTAAACGGCGAGACGAATCTATTAAGCTTAATTAGTCCATGATTTGACAATGTGTTGCTACAGTAAATATTTGCTAATGATGGATTAATTAGGCTTAATTAGGCTTAATAGATTCGTCTCGCCGTTTAGATTCCACTTATGTAATTGGTTTTGTAAATAGTCTACGTTTACTACTCCTAATTAGTATCTAAACATTCGATGTGACACGTGCTAAAAATAAGACACGGGAAGAAAACGCCCC	353
ba2070	DEL	Chr3	13747058	13747551	AGGATCATTAGATAAATGACATTTATACTTAAGTTGAGTTTGCTCAAAGTCACCAATAATAAAAACAATGAAAAGGAAAAGGTAGCAATAGAATTGAAGAACTTCAAAACCTATAGCGGAACCAAAGGAGTGTACTACCGCTATGGTTATATATGAGTATATATCATGGTGGATTTACTCAGCTCGTTCGCTTGGCTGCTGCGTTCGGTTTCTGGCTGCTGCGGCAGAGAGCCGAGCAGCAGCAGCCAGCTGCAAAGCAGCCAGCCGAACGAGGCCACTGAAACCAAATTAATGTTGCAGATGTCGGTGTATATTTCTATACATGTGTTTTAGATAAGTTTGATTTAAGATAAAATAAAATATTCTATGTTTTGGAATAATGAGGATAAGGTCATCCTG…	103
ba2073	DEL	Chr3	13775186	13775684	GAGCGCGATGGGGACGTTACGTTGCAGTGCAGAGGGGTCGGTCCTCCTTCCCGCTTTCCTCGCGGCATTGGCGCCATGTGCGGTGCCTGCATTAGACACCGTTCTTTATCCTCCCCTGTTCAGGAGACAAAGCTAGGGTTTCTAAAAGCTGATCTGATGTGAAGTGGGGCTGGGGTGTTTGCTAAAATTCCTATCACATCAAATGTTTAGATACTAATTAGGAGTATTAAATATAGACTAATTACAAAACCAATTGCACAGATGGAGACTAATTTGCGAAACGAATCTATTAATCCTAATTAGTCCATGATTTGACAATGTGATGCTACAGTAAACATGTGCTAATGATGGATTAATTAGGCTTAATAGATTCGTCTCGTGAATTAGCCTCCATCTGTG…	335
ba2084	DEL	Chr3	13975271	13975651	AATTCTGCTTCATGTTAGGCCCCGTTTGGATCATTGGAATTGAATTCCATCCTAATAATCATAATTTAGACACAAATTAATTAAGCTAATATAATTGTATGTGGAATATAGTTGTATATTATAGTTGGTGATATAGGAGAGATACTTATATGCTGCACTTCTACTATAGAGAAGCGAGTCTAAGAGCGTGCTATAAGAATTGAATTCCATTCTAATAACCATAATCTATAGAATCAATTTCTATCTCTCACCCCATGAATTTAAGATAGGCTTATATCTAAACTTTGGAAAGTTGTGGAATGCCACATTCCAACATAAATTAGCCTACTCCATTAAATAGATTCCAATTCCTTCAAAATGAAGGGACCCAAACGGGACCT	373
ba2089	DEL	Chr3	14108444	14108852	ACTTAAGGGGGTGTTTGGGAACACCGTGCTAAACTTTAGCACATGTCACATCGGATGTTTGTATACTAATTAGGAGTATTAAACATAGTCTAATTACAAAACTAATTGCACAGATGGAGTTTAATTCGCGAGACGAATCTATTAAACCTAGTTAGTCCATGATTTGACAATGTGGTGCTACAGTAACCATTTGCTAATGATGGATTAATTAGTCTTAATAGATTCGCTCGCGAATTAGACTCCATCTATGCAATTAGTTTTGTAATTAGCTCATGTTTAGTCTTGTAATTAGCTCATATTTAATCCTTCTAGTATATGAACATCCGATGTGACTGTTAAAGTTTAGCACCTCGTATCCAATCGTACTCAGGTGATATGGCACATGTTAATTAGGCCTCC…	329
ba2090	DEL	Chr3	14119451	14119667	ACTTGCGGTACATGCATGGAGTACTAAATGTAGACGAAATAAAAAATTAATTGCACAGTTTTGTTGTACTTTGCGAGACGAATCTTTTGAGCCTAATTAGTCAATATTTGGACAATAATTCACAAATACAAACGAAACCCTACAGTGTGCTACAGTGCTACAACAGTAATTTTGGACACCCAAATTCAGGGCAACTAAACAAGGCCCAAGAAGCTA	282
ba2092	DEL	Chr3	14122297	14122489	GCTTATAAGCGGCTTATCGGTGGAAATAAGCAAGAATCCCGCCAAACGCTTTGCTTATTTCCACCGATTCTCGCTTATGTGGTAAGCCGCTTCAACGATTTGAACTACGAGAAGCGAAAAGCGAGAAGCGAGAAAATCTTCGCTTAGATTATAATCTAAGTGTGACTAGGAAAAGCGTATACAAACAGGGCC	198
pD4590	DEL	Chr3	14208045	14208342	GGAGACAGGGACTAAACTTTAGCCCTGTTACATCGGATGTTCGGATGCTAATTAGCACGACTAAATATGAGCTAATTACAAAACTAATACTAGAACTCCCAGGCTAAATCGCGAGACGAATCTATTAAGCCTAATTAATCCATCATTAGCGAATGGTTACTGTAGCACCACATTGTCAAATCATAGACTAATTAGGCTTAATAGATTCGTCTCGCGATTTAGCCTCGGGGTTGTGCAATTAGTTTTGTAATTGACCAATGTTTAATACTCCTAATTAGTGTCAAACATCCGATGTGA	294
ba2094	DEL	Chr3	14236427	14236766	TTGGCTCCCTGGTGTTAAAGTTTAACACCCGTCACATCGAATGTTTGGATGCTAATTAGGAGTATTAAACATAGACTAATTACAAAGCTAATTGCACAGATGGAGTGTAATTCGTGAGACGAATCTATTAAGCCTAATTAGTCCATGATTTGACAACGTGGTGCTACAGTAACCATTTGTTAATGATGGATTAATTAGGCTTAATAGATTCGTCACGTGAATTAGCACAGGATTATGCAATTAGTTTTATAATTAGCTCATGTTTAGTTCTCCTAATTAGCATCCGAACATCCGATGTGACACTGTTAAAGTTTAGCACCTCGTATCCAAACACCCCCT	354
ba2096	DEL	Chr3	14537822	14537957	AATTATAAGTCACTTTAACTTTTTTTTACATCCACCTTACTATACATCTAGACATATTGTTATATCTACATACATAGCAAAGTGAATGTATCAAAAAAGTCAAAGCGACTTATAATTTGGGATGGAGGGAGTAGT	141
ba2106	DEL	Chr3	14845490	14845779	AAGGTGCACACAAGTCTCAGGCCTTGTTTAGTTGGGGAATTTGGGAGGTGCCAAATTACTGTTACAACACTGTAGCACACTGTAGCGTTTCGTTTGTATTTGTGAATTATTGTCCAAATATTGACTAATTAGGCTCAAAAGATTCGTCTCGCAAAGTACAACAAAACTGTGCAATTAGTTTTTAATTTCATCTACATTTAGTACTCCATGCATGTACCGCAAGTTTGATGTGATGGGGAATCTTCTTTTTGCATAGTGTCAAAGTTGGGAGTTGGGAGTAACTAAACAG	303
ba2107	DEL	Chr3	14860518	14860765	GTGGTAAAATTGGCATTTTGCCATAAATGCGCAACTGTAGCGTTTCGTTTGTATTTGTGAATTATTGTCCAAATATTGACTAATTAGGCTCAAAAGATTCGTCTCGCAAAGTACAACAAAACTGTGCAATTAGTTTTTAATTTCGTCTACATTTAGTACTCCATGCATGTACCGCAAATTTGATGTGATGGGTAATCTTCTTTTTGCATAGTGTCAAAGTTGGGAGTTTGGAGGGAACTAAATATGG	277
pD4626	DEL	Chr3	14861700	14862002	GGTACTAAACTTTAGGAGTGCCACATCGGATGTTCGGATGCTAATTAGAAGGACTAAATATGAGCTAATTATAAAACTAATTGCAGAACCCCTATACTAATTCGCGAGATGAATTTATTGAGTCTAATTAATTCATGATTAGCACATGTTTACTGTAGCAGCACATTGTCAAATCATGGACTAATTAGGCTAATAGATTCGTCTCGCGAATTAGACTCCATCTGTGCAATGGGTTTTGTAGGGTTTTGTAAATAGTCTATATTTAATACTTCGAATTAGTATTCAAATATCCGATGTGACAG	300
ba2108	DEL	Chr3	14862197	14862391	TGGGAAACAGCTTCTCGATCACATTCAGTGCAGTATGTATCAATATGGAAAAAAACCCTACTACTTGAAAATCACATCTGTGTCTACCCTCTTCGGTTGACTAAGGCGAGAATAAGTTTGTGGGAAACAGCTTCTCGATCACATTCAGTGCAGTATGTATCAATATGGAAAAAAAAGCTACTACTTGAAAATTA	118
ba2110	DEL	Chr3	14934219	14934520	CCATCCCAGGGAGTATTCTTCAGGCCTTGTTTAGTTGGCAAAATTGGGAGGTGCTAAATTACTGTTACAGCACTGTAGCACACTGTAGCGTTTCATTTGTATTTGTGAATTATTATCCAAATATTGACTAATTAGGCTCAAAAGATTCGTCTCGCAAAGTACAACAAAACTGTGCAATTAGTTTTTAATTTCGTCTACATTTAGTACTCCATGCATGTACCACAAGTTTGATGTGATGGAGAATCTTCTTTTTGCATAGTGTTAAAGTTGGGAGTTGGGAGTGAAGTAAACAAGGGGTCAG	277
ba2111	DEL	Chr3	14949787	14949974	TCGTAGCCACGCTTGGATTATAATCTAAGCGAAGATTTTCTCGCTTCTCGCTTTTCGCTTCTCGTAGTTCAAATCGTTGAAGCGGCTTACCACATAAGCGAGAATCGGTAGAAATAAGCAAAGCGTTTGGCGGGATTCTCGCTTATTTTCACCGATAAGCCGCTTATAAGCGGATACAAACGGGGCC	202
pD4649	DEL	Chr3	14952200	14952482	GTAAGGCCATGTTTAGTTTCTCCCAAAATCCTAACTTTGACACTATGCAAAAAGAAGATTCTCCGTTACATCAAACTTGCGATACATGCATGGAGTACTAAATGTAGATGAAATTAAAAACTAATTGCACAGTTTTGTTGTACTTTGCGAGACGAATCTTTTGAGCCTAATTAGTCAATGTTTGGATAATAATTCACAAATACAAACGAAATGCTACAGTTGCGCATTTATGGCAAACTCCCAACTTTAGCACTCCCAAATTGGGAACTAAACAAGGACTAA	278
ba2113	DEL	Chr3	14976651	14976959	GTCTCCATCTTTCAAAATGGAAAGCGAGCTGTCGCCTCCTTGTTTAGTTCACCCCCAACTCCCAACTTTGGCACTATGCAAAAAGAAGATTCCTCATCACATCAAACTTGCGGTACATGCATGGAGTACTAAATGTAGACGAAATTAAAAACTAATTGCACAGTTTTGTTGTACTTTGCGAGACGAATCTTTTGAGCCTAATTAGTCAATGTTTGGACAATAATTCAAAAATACAAATGAAACGCTACAGTGTGCTACAGTGCTGTAACAGTAATTTGGTACCTCCAAACTTTGGCAACTAAACAAGA	263
ba2115	DEL	Chr3	15055251	15055588	TTTGAAGTAATTGGAATCTATTTAATGGAGTAGGCTAATTTATGTTGGAATGTGGCATTCCACAACTTTCCAAAGTTTAGATATAAGCCTATCTTAAATTCATGGGGTGGGAGATGGAAATTGATTCTATAGATTATGGTTATTAGAATGGAATTCAATTCTTATAGCACGCTCTTGGACTCGCTTCTCTATAGTAGAAGTGCAGCATATAAGTATCTCTCCCATATCACCAACTATAATATACAACTATATTCCACATACAATTATATTAGCTTAATTAATTTGTGTCTAAATTATGATTATTAGGATGGAATTCAATTCCAATGATCCAAACGGG	326
ba2120	DEL	Chr3	15271357	15271677	AATCATTCCAAGAATCTTGGAGAGTCAAAGCATCTCAAGTTTGACCAAAATTATAGAGAAAATTATAAAGATTTATGACATCAAATAGGTATACTATGAAATAATTGATGAAGAATCTAATGATACTTAGATGACATCATAAATGTTATTATATTATCATATAAATTTGGTCAAACTTAAGATACTTTGACTCTCCAAGATTCTTGGAATGACTTATTTTGGGATGGATGAGTACCATTAGTTTCTTCATTAAATATATTTTCATAGTATATCTATTCGATGTCATAAATTTTTGTGATCTATAATTTTAGTTAAATATA	266
ba2121	DEL	Chr3	15495350	15495616	GTTTAGTTACCCCCAACTCCCAACTTTGACACTATGCAAAAAGAAGATTCCCCATCACATCAAACTTGCGGTACATGCATGGAGTACTAAATGTAGACGAAATTAAAAATTAATTGCACAGTTTTGTTGTACTTTGCGAGACGAATCTTTTGAGCCTAATTAGTCAATATTTGGACAATAATTCACAAATACAAACGAAACGCTACAGTGTGCTACAGTGCTGGCACAGTGATTTTGCATCTCCCAAATTGGCCAACTAAACAAGG	272
ba2122	DEL	Chr3	15531578	15531746	ATGACCAACGACCAGGGCTGGGCCTTAGACCTATGCTTTGGCGTGGGAGATGAGGGGATTTTTTTAACCCTAGCTTGAAATTCGCTCCCACGGGGAGTCGAACCCAGAACCTGAGGAGTGCTACTAGAGCCACCTAACCAGGACCTGAGGAGTTTGACTTTAACTTTT	160
ba2141	DEL	Chr3	15687728	15688156	TAGTTGGCCAAATTGGGAGGTGCCAAATTACTGTGCTGGCACTGTAGCATACTGTAGCGTTTCGTTTGTATTTGTAAATTATTGTCCAAACATTGACTAATTAGGCTCAAAAGATTCGTCTCGCAAAGTACAACAAAACTGTGCAATTAGTTTTTAATTTCATCTACATTTAGTACTCCATGTATGTACCGTAAGTTTGATGTGATGGGGAATCTTCTTTTTGCATAGTGCCAAAGTTGGGAGTTGGGGGTGAACTAAACATGACCTAACACGATGGCAACTGCTCCCTCGATTCAGTGTAGCCAAATCTAGACCTGCCTATTAAAACGGAGGGAGTAGATGGGATCACACGGGTGAGGGTGACGGCTGCGGTTCGCACGCGAAGCTGCTTCTTGCACT…	272
ba2145	DEL	Chr3	15777779	15778105	TAAACTTTAGCACCCGTCACATCGAATGTTTAGATACTAATTAGGAGTATTAAACGTAGACTATTTACAAAACCCATTACATAAGACGAATCTAACTGGCGAGACGAATCTGTTAACTGGCGCTTACTGCCTTGCTAATGTGTTGCTACAGTAAATATTTGCTAATGATGGATTAATTAGGCTTAATTAAGCTTAATAGATTCGTCTCGCCGTTTAGATTCCACTTATGTAATTGGTTTTGTAAATAGTCTACGTTTACTACTCCTAATTAGTATCTAAACATTCGATGTGACACGTGCTAAAAATAAGACACGGGAAGAAAACGC	364
ba2147	DEL	Chr3	15816505	15816721	TCAGATATCGGGACATATAATACATTACAACCTTATTTTCCTTTCATTGGATCAATTACTGCCTGTGGCAACTCTAAGATAGCTGGTATCCCAGGATACCGACTAAGGAGCTACAATACAAAAATTACAAGGAACACCTCCCAAATAATGGCATCTTTGAGAAGCTCGCTGGGTGCACGATACAGCCTCATCACGAGGATTCTTCTAGCATCGTTA	237
ba2150	DEL	Chr3	15833250	15833455	CTGAAATCAAACGTTTGTGAACTACTCCCTCCGTTCCAAATTATAGGTCGTTTTGACTTTTCTAGATACATAGATATTATCATGCATCTAGACATAGGGTATATCTAAACGTATAACAAAATCTATGAATCTAATAAAATCAAAACGACCTATAATTTGGGACGGAGGGAGTAGTATATGTCACTATATCTATATATGGGTGAGG	145
ba2152	DEL	Chr3	15834974	15835199	CAGCTAGCAAGCGGGCTACAAGGTTTCTCTCAGCTTTTTTTCTAGCCCACTCGTACAATGGTTAGTTCTTCACCATTAATACATGGTCCACAAGTCATTCTCACAAAGTTTCTTGATTCCTATGCTCAAGTCGGCTGTAAGCTTATAGCCCGCTTCTCCTCTCTCACCTCTTCTCTCTCCTCCACGTCAGCATTCAGCCAGCTTACGATCCCTTATTATACTTGC	241
pD4746	DEL	Chr3	16043785	16043893	ATCCTTGGAGAATATTTGATTGCAAGTGAATAAACACAAAATGATGGAGAGAGCACCCTATATGGATCCAGGAAACATGCTTCTGACCACTAGGAGGTTGCCACGTGT	106
ba2161	DEL	Chr3	16069108	16069314	AGGTCCTGTTTGTATACGCTTTTTCTAGCCACACTTAGATTATAATCTAAGCGAAGATTTTCTCGCTTCTCGCTTTTCGCTTCTCGTAGTTCAAATCGTTGAAGCGGCTTACCACATAAGCGAGAATCGGTGGAAATAAGCAAAGCGTTTAGCAGGATTCTCGCTTATTTCCACCGATAAGCTGCTTATAAGCGGATACAAACGGG	208
ba2170	DEL	Chr3	16301216	16301533	GGTGCTAAACTTTAGCAGTGTCACATCGGATGTTCTGATGCTAATTATGAGGATTAAATATAAGCTAATTACAAAACTAATTGCACAGATAGAGTCTAATTCGCGAGACAAATCTATTAAGCGTAATTAATCCATCATTAGCAAATGGTTACTGTAGCACCACATTGTCAAATCATAGACTAATTAGACTTATTAGATTCGTCTCGCGAATTAGACTCCATCTGTGCAATTAGTTTTGTAATTAGGTTATATTTAATACTCCTAATTAGTATCAAACATTCAATGTGACGGATTTAGCACCTTGAGCCAAACAGCCC	350
ba2184	DEL	Chr3	16472569	16472856	ATTTAGTTTCTCAATTAGGAATGGTAAAGTTTGCATTTTGCCATAAATTCGTAACTGTAACATTTCGTTTGTATTTATGAATTATTGTTCAAATATTGACTAATTAGGCTCAAAAGATTCGTCTCGCAAAGTACAACAAAACTGTGCAATTAGTTTTCGATTTCGTCTACATTTAGTACTCCATGCATGTACAGTAAGTTTAAGGTGATGGGAAATCTTCTTTTTACATAGTGTCAAAGTTGGGAAAAAGGAGAACTAAACAAGTCCTGGATCTCTGTGTCCAAACT	276
ba2185	DEL	Chr3	16485575	16485810	GACGCACACTGTGGCAAACAGCCGGAGACCTGAGCGACCAGTACCAGAATAACAATTTAGTACTAAATGTAGATGAAATTAAAAACTAATTGCACAGTTTTGTTGTACTTTGCGAGATGAATCTTTTGAGCCTAATTAGTCAATGTTTGCACAATAATTCACAAATACAAACGAAACGCTACAGTGTTGCTACAGTAATTTGGCACCTCCCAATTTGGCCAAGTGAACAAGGGCC	264
ba2190	DEL	Chr3	16999094	16999458	TTCTTCCGGTGACTTATTTTTAGCACATGAGTATTAAACGTAGACTATTTACAAAACTCATTACATAAGTGGAGGCTAAATAGCGAGACGAATCTATTAAGCCTAATTAATCCATCATTAGCAAATGTTTACTGTAGCAACACATTGTCAAATCATGGATTAATTAGGCTTAATAGGTTCGTCTCGCCGTTTAACCTCCACTTATGTAATGAGTTTTGTAAATAGCCTACGTTTAATACTCCTAATTAGTATCTAAATATTTGATGTGACACTTGCTAAAAATAAGCAAAGATAACCAAACGCGCCTAAAGGTAAACTCCAGAGTCTGCAGTAAAATCAGGCGTTGTAAACTCCACTTATGTAA	326
ba2192	DEL	Chr3	17049605	17050175	AGTTAGCAGTCGATGACAGAGAAAGGAGCTGCTTTATCCCCTGTAGTCTCCAACCACAGTGACAACGAAATTCTCTAGTCCAGCGTCAGGGTGCGCCTAATCCTTTTTTGTGGTGCTTTCACACGGCGACCCGATTTGTAGTTCCAATCTTTCCCTCCAACAAATCAAACCTGAAGTATGAAAGGAGCATCCATGATTGAACACAATAGCTTAACATGAAATTGAAACTCGATCACTTCTAGTGTTTTGTCAGAGGGCCTGTTCGCTTCAGCTTATAAGCCGGCTGAAAAGCTGAAACGGCTGATTTGTTGTGAGAGGAAAACACTGTTTGATGGCTGATAAGCCGACTGAATAAGCTGAAGCGAACAGGGCGAGAATCAATTACAAATGCAGCAACTG…	129
pD4824	DEL	Chr3	17272754	17272888	AAATTCTTGTTTCTCCGAAGAATCTGTAGATTTCTCTGGAAATTCTGTAAGTTGCGAAATTTTCGGAACGATCTCTGGAAACTCCGGAAGTTGCTGATAAACTTGTTCGAAGTTGTAAAAATTCTCAAGTTCGA	132
ba2198	DEL	Chr3	17360934	17361297	AGGCGTTCATTTATGTCCTGGATTTCTTAGGATCCGTTTGGTTGCTTTTGCTTATTTTTAAGCAAGTGTTTAGATACTAATTAGAAGTATTAAACGTAGACTATTTACAAAACTCATTACATAAGTGGAGGCTAAACAGCGAGATGAATCTATTAAGCCTAATTAATCCATCATTAGCAAATGTTTACTGTAGCAACACATTGTCAAATCATGGGACTAATTAGGCTTAATAGATTCGTCTCGTCGTTTAGCCTCCACTTATGTAATCGGTTTTGTAAATAGTCTACGTTTAATACTCCTAATTAGTATCTAAACATTCGATGTGATGGGTGCTTAAATTTAAGCAAGTGAACCAAACCAGGC	344
ba2201	DEL	Chr3	17452947	17453364	GCGAGAGGAAAGAGCCAAAATGCCACGAACGTGCCCCTGTTTCTCGAGGGAGGGACAGGGCACGCTACTTTAGGGGGTGTTTGGGAAACCCCTGTTAAAGTTTAACACCTGTCACATCGGATGTTTGGATGCTAATTAGGAGTACTAAACATAAGCTAATTACAAAACTAATTGCACAGATGGAGTATAATTCGCGAGACGAATCTATTAAGCCTAATTAGTCCATGATTTGACAATGTGGTGCTACAGTAACCATTTGCTAATGATGGATTAATTAGGCTTAATAGATTCGTCTCGCGAATTAGCACAAGGTTCTGCAATTAGTTTTATAATTAGCTCATATTTAGTCCTCCTAATTAGCATCCGAACATCCGATGTGACACTGTTAAAGTTTAGCAC…	360
ba2202	DEL	Chr3	17455070	17455455	GAGAAAAAGGAGGAATTTGGTGCGCAAAGAGATAGGGGGCGTTTTCTTCCCGTGTCTTATTTTTAGCACGTGTCACATCGAATGTTTAGATACTAATTAGGGAGTAGTAAACGTAGACTATTTACCAAACCAATTACACAAGTGGAATCTAAACGGCGAGACGAATCTATTAAGCCTAATTAATCCCATCATCAGCTAAATATTTACTGTAGCAACACATTGTCAAATCATGGACTAATTAGGCTTAATAGATTCGTCTCGCCGTTTAGATTCGTCTTATGTAATGGGTTTTGTAAATAATCTACGTTTAATACTCCTAATTAGTATCTAAACATTCGATGTGACGGGTGCTAAAGTTTAGCAAGTGGAAGAAAACAGGCCTATA	359
ba2206	DEL	Chr3	17499551	17499819	TTTTCATCAGATATTGGTTAATGAAGAAGATCAGTACAAAACTATTTTTCAAACACATTTCGGCCATTTTGAGTATAAGCTTATGCCATATGGGTTAACAGGAGCACCATCTACATTCCAAGCTATTATGAACCACATATTGGCACCTCTGCTCAGGAAGTGTGTGGTAGTCTTCATTGATGATATACTTATATACAGTAAGAGCTATGAAGAGCACGTGCAACATGTAAGATGGTCTTTGACTTGTTGAAAGAACATCAATTTAAAG	236
ba2216	DEL	Chr3	17557306	17557460	GGGTGGGTACAAGATCTTACCCGACTAAACCTGATAGATACCTGAAACCTGTCGGATACCCAGTGGGTGGGTACAAGATCTTACCCGACTAAACCTGATAGATACCTGAAACCCACCCGTTGGATACCCAATGGGTGGGTACAAGATCTTACCC	132
ba2217	DEL	Chr3	17582245	17582525	CAAAATCCCAACTTTGACACTATGCAAAAAGAAGATTCCCCATCACATCAAACTTGCGATACATGCATGGAGTACTAAATGTAGATGAAATCAAAAACTAATTGCACAGTTTTGTTGTACTTTGCGAGACGAATCTTTTGAGCCTAATTAGTCAATTTTTGGACAATAATTCACAAATACAAACGAAATGCTACAGTTGCACATTTATGACAAACTCCCAACTTACAGTTACGCATTTATGACAAACTCCCAACTTTGGCACTCCCAAATTGGGAACAAG	312
ba2225	DEL	Chr3	18015203	18015414	CCGGAACTAAAACGGCACGTTAAGCTTCAGCTTATTCAGCTGGCTTATCAGCCACCGAACAGTGTTTTTCTCTCACAACAAATCAGCCGTTTCAGCTTTTCAGCCAGCTTATAAGCTGAAGCGAACAGACCCAAAGAGGTCACGGGAGCCTCAGGGACCTATCCATTAGACCCGATACTAATGCTTACATCATTATCGAGTCAAAACCAAC	159
ba2229	DEL	Chr3	18125834	18126217	AGCCCCCTCTTTCTTTCTTTGCCTGGGGGCCTGTTTGGCTCACCGGTGTTAAAGTTTAACACCCGTCACATCGGATGTTTGAATGCTAATTAGGAGTATTAAACATAGGTTAATTACAAAACTAATTGCATAGATGGAGTGTAATTCGCGAGACGAATCTATTAAGCCTAATTAGTACATGATTTGACAATGTGGTGCTACAGTAACCATTTGCTAATGATGGATTAATTAGGCTTAATAGATTCGTCTCGCGAGTTACTATCGGGGTGTGCGATTAGTTTTATAATTAGCTCATATTTAGTTCTCCTAATTAGCATCCGAACATTTGATGTGACACTGTTAAAGTTTAACACCTCGTATCCAAACACCCCCTGGGTCTCCCT	347
ba2232	DEL	Chr3	18808184	18808532	TCGGGTGTTAAAATTTAACACCCGTCACATCGGATGTTTGGATGCTAATTAGGAGTATTAAATATAGACTAATTACAAAATTAATTGCATAGATGGAGTGTAATTTGCGAGACGAATCTATTAAGCCTAATTAATCCATGATTTGACAATGTGGTGCTACAGTAACCATTTGCTAATGATGGATTAATTAGGCTTAATAGATTCGTCTCGCGAATTAGCACAGGGTTCTGCAATTAGTTTATAATTAGCTCATGTTTAGTTCTCCTAATTAGCATCCGAACATCCGATGTGACACTGTTAAAGTTTAGCACCTCGTATCCAAACACCCCCTTAGCGTGCCGCTACTTC	348
ba2242	DEL	Chr3	19553470	19553597	TTATAGGTCGTTTTGACTTTTCTAGATACATAGATATTATTATGTATCTAGACATAGGGTATATCTAAGTGCATAATAAAGTCTATGAATCTAATAAAGTCAAAACGACCTATAATTTGGAACGGAG	149
ba2252	DEL	Chr3	21317301	21317642	GTTTGGATACGAGGTGCTAAACTTTAACAGTGTCACATCGGATGTTCGGATGCTAATTAGGAGGACTAAACATGAGCTAATTATAAAACTAATTGCAGAACCTTGTGCTAATTCGCGAGACGAATCTATTAAGCCTAATTAATCCATCATTAGCAAATGGTTACTGTAGCACCACATTGTCAAATCATGGACTAATTAGGCTTAATAGATTCGTCTCGCGAATTATAATCCATCTGTGCAATTAGTTTTGTAATTAGCTTATGTTTAGTACTCCTAATTAGTATCCAAACATCCGATGTGACAGGTGTTAAACTTTAACAGGTGTTTCCCAAACACCCCCG	350
ba2253	DEL	Chr3	21438396	21438719	ACTTATTTTTAAAGCACCCGTCACATCGAATATTTAGATACTAATTAGAGTATTAAACGTAGACTATTTACAAAACCCATTACATAAGTGGAGGCTAAACGGCTAGACGAATCTATTAAGCCTAATTAGTCCATGATTTTAAAATGTGTTGCTACAGTAAACATTTGCTAATGATGGATTAATTAGGCTTAATAGATTCATCTCGTCGTTTAGCCTCCACTTATGTAATGGGTTTTGTAAATAGTCTACGTTTAATACTCCTAATTAGTATCTAAACATTCAATATGACACGTGCTAAAAAATAAGCAGAGGAACCAAACACC	344
ba2254	DEL	Chr3	21454637	21454886	AGTTTTAATCCACCAGGATAAGCAGGAACAGCATCATAGATTCTTCAGGTTAGTTGAGGAATGTTTCAAATAGCGCTAGGCACTAGGCAGAGCGTGGCTGATTGTTCATTTTGCCAGCAGCTAGAATAATGCATTAACAGAAAGGTGGCTAAAACAATGAAAACTGGTACAGTAACATGACGTGATGAAGTTTTAATCCACCAGGATAAGCAGGAACAGCATCATAGATTCTTCAGGTTAGTTGAGGAA	185
ba2255	DEL	Chr3	21466783	21466940	AGTGCTGCCGCACTGACGTGTTATTCAGATTCAGCCGCCGCTGGCCTGTTCGCTTCAGCTTATAAGCCGGCTGAAAAGCCGAAACGGCTGATTTATTGTGAGAGAAAAATACTGTTTGATGGCTGATAAGCCAGCTGAATAAGCTGAAGCGAACAGG	108
ba2263	DEL	Chr3	22127190	22127519	ACTCCCAACTTTGACACTATGCAAAAAGAAGATTCCCCATCACATCAAACTTGCGGTACATACATGGAGTACTAAATGTAGATGAAATTAAAAACTAATTGCACAGTTTTGTTGTACTTTGCGAGACGAATCTTTTGAGCCTAATTAGTCAATATTTGGACAATAATTTACAAATACAAACGAAACGCTACAGTGTGCTACAGTGCTGTAACAGTAATTTGGCACCTCCCAAATTCCCCAACTAAACACGGCCTGGGTGTTGCTCTTAAAACACAGCAACATGGGGTACATCGGCAAGGGCATTCGTGATTCGTGATCCGTGCGAGATT	285
ba2267	DEL	Chr3	22214936	22215188	ATTTGGGAGGTGCCAAATTACTGTTACAGCACTGTAGCACACTGTAGCGTTTCGTTTGTATTTGTGAATTATTGTCCAAATATTGACTAATTAGGCTCAAAAGATTCGTCTCGCAAAGTACAACAAAACTGTGCAATTAGTTTTTAATTTCATCTACATTTAGTACTCCATGCATGTACCGCAAGTTTGATGTGATGGGGAATCTTCTTTTTGCATAGTGTCAAAGTTGGGAGTTGGGAGTAACTAAACATG	278
ba2268	DEL	Chr3	22270040	22270458	CGCAGGCCTGGCTGTTTTACCCGAGCCAGACTTGCACAGGGCTCCGGCGGGATGTCCTTGGGCCACGCGGGGGTGTTTGGGAAACACCTGTTAAAGTTTAACACCTGTCACATCGGATGTTTGGATGCTAATTAGGAGTACTAAACATAAGCTAATTACAAAACTAATTGCACAGATGGAGTATAATTCGCGAGACGAATCTATTAAGCCTAATTAGTCCATGATTTGACAATGTGGTGCTACAGTAACCATTTGCTAATGATGGATTAATTAGGCTTAATAGATTCGTCTCGCGAATTAGCACAAGGTTCTGCAATTAGTTTTATAATTAGCTCATGTTTAGTCCTCCTAATTAGCATCCAAACATCCGATGTGACACTGTTAAAGTTTAGCACCTCG…	357
ba2269	DEL	Chr3	22403088	22403420	GATCCCGGAGCTAAAGTTTAGTCTGTGTCACATCGGATATTCGGATGCTAATTAGGAGAACTAAATATGAGCTAATTACAAAACTAATTGCAGAACCCCTAGGCTAAATCGCAAGACGAATCTATTAAGCCTAATTAATCCATCATTAGCGAATGTTTACTGTAGCACCATATTGTCAAATCATGGACTAATTAGGCTTAATAGATTCGTCTCGCGATTTAGCTTAGGGGTTGCGAAATTGATTTTGTAATTAGCCTATGTTTAATACTTCTAATTAGTGTCCAAACATTTAATGTGACAAGGGCTAAAATTTAGCCCGAGGATCCAAACAC	334
ba2274	DEL	Chr3	22500661	22500911	CCAACTTTGACACTATGCAAAAAGAAGATTCCCCATCACATCAAACTTGCGGTACATGCATGGAGTACTAAATGTAGATGAAATTAAAAACTAATTGCACAGTTTTGTTGTACTTTGCGAGACGAATCTTTTGAGCCTAATTAGTCAATATTTGGACAATAATTCACAAATACAAACGAAACGCTACAGTGTGCTACAGTGCTGTAACAGTAATTTGGCACCTCCCAAATTCCCCAACTAAACACGGCCT	274
ba2277	DEL	Chr3	22571951	22572247	GTGAAACTTGAAAACCGAACCAAGGCCATGTTTAGTTACTCCCAACTCCCAACTTTAACACTATGCAAAAAGAAGATTCCCCATCACATCAAACTTGCGGTACATGCATGGAGTACTAAATGTAGATGAAATTAAAAACTAATTGCACAGTTTTGTTGTACTTTGCGAGACGAATCTTTTGAGCCTAATTAGTCAATATTTGGACAATAATTCACAAATACAAACGAAACGCTACAGTGTGCTACAGTGCTGTAACAGTAATTTGGCACCTCCCAAATTCCCCAACTAAACAAGGC	296
ba2278	DEL	Chr3	22576039	22576304	TTAGTTACTCCCAACTCCCAACTTTGACACTATGCAAAAAGAAGATTCCCCATCACATCAAACTTGCGGTACATGCATGGAGTACTAAATGTAGATGAAATTAAAAACTAATTGCACAGTTTTGTTGTACTTTGCGAGACGAATCTTTTGAGCCTAATTAGTCAATATTTGGACAATAATTCACAAATACAAACGAAACGCTACAGTGTGCTACAGTGCTGTAACAGTAATTTGGCACCTCCCAAATTCCATAACTAAACAAGGC	276
ba2279	DEL	Chr3	22576579	22576850	TCCCAACTTTGACACTATGCAAAAAGAAGATTCCCCATCACATCAAACTTGCGGTACATGCATGGAGTACTAAATGTAGATGAAATTAAAAACTAATTGCACAGTTTTGTTGTATTTTGCGAGACGAATCTTTTGAGCCTAATTAGTCAATATTTGGACAATAATTCACAAATACAAACGAAACGCTACAGTGTGCTACAGTGCTGTAACAGTAATTTGGCACCTCCCAAATTCCCCAACTAAACAAGGCCTAGATTTTGTTTCGTCCATG	276
ba2281	DEL	Chr3	22621536	22621757	CAAGTGGCAACCACGGATATTCACATGGATTCGGAAATAATTCGTCTGAGCGGAATTTGGCACCGATGCCGGAACAACTTCGGATGCTAAATTTATTTTACTTCCTCCGTCCTAAATTGTAGGTCGTTTTGATTTTTGTCGTTTTGGTATTTCTAGGCCTAGATATAGTCTAGTCTAAATATATAACAATATCTATAAACTTAGAAAAGCTAAAACGACCT	144
ba2288	DEL	Chr3	22689930	22690323	GTTTTCATGACTAAGGGGGTGTTTGGATCCTGGAGCTAAAATTTAGTCCGTGTCACATCGGATATTCGGATGCTAATTAGGAGGACTAAACATGAGCTAATTACAAAACTAATTGCAGAACCCCTAGGCTAAATCGCGAAACGAATCTATTAAGCCTAATTAATCCATCATTAGTGAATGTTTACTGTAGCACCATATTGTCAAATCATGGACAAATTAGGCTTAATAGATGTCGTCTCGTGATTTAGCCTAGGGGTTGTGAAATTGGTTTTGTAATTAGCCTATGTTTAATACTCCTAATTAGTGTCCAAATATTCGATGTGACAAGGGCTAAAATTTAGCCTGGGATCCAAACACCCCCTTTAGCCCGGGGATCCAAACACCTCTAAAAAA	394
ba2289	DEL	Chr3	22696194	22696497	TCCGATCGATGCTTCTGATTTCTTCAAAGCCTCTATGCCCTTGTTTACTTTGCGAATTTGGGAGGTGCCAAATTACTATAGCAACACTGTAGCGTTTCGTTTGTATTTGTGAATTATTGTCTAAATATTGACTAATTAGGCTCAAAAGATTCATCTCGCAAAGTACAATAAAACTGTGCAATTAGTTTTTGATTTCGTCTACATTTTGTACTCCATGCATGTACCGCAAGTTTGATGTGATAGGGAATCTTCTTTTTGCATAGTGCCAAAGTTGGGAGTTTTGTAGGAAGTGAACAAGGGCTA	266
pD5005	DEL	Chr3	22708323	22708679	GAGCAACTCCAAGAGGCTGCTAATCTTACCCCCAATACCTTTTTTAGGAAAAAAGAGAGAAAAAATGAACTCCAACAATCCACCTAAACCTTCCCAATTTTTTAGCGACGCTAAAAAACAGCCTGCCACCGCGTATATTTTAGCGTTGGCGTTCCTCCCCCAATCCTGATTCCCGCACGCCCGCGCGTCCCTTCCGATGGGCCCAATACGATGACGTGGCCTGTGTTTGAAATATTGGGAGCTATTTATTAGCGATCTGCTGTGGACTAATATGTTTTTGGGGGAAATTTTTTTTAGGAGAACCCCCAATACTATGTATTGGGGAAGAATTTTTTAGGATACTCTTGGAGTTGCTC	355
ba2295	DEL	Chr3	22770003	22770312	AACTCCCAACTTTTGCACTATGCAAAAAGAAGATTCCCCATCATATCAAACTTGCGGTACATGTATGGAGTACTAAATGTAGACGAAATTAAAAACTAATTGCACAGTTTTGTTGTACTTTGCGAGACGAATCTTTTGAGCCTAATTAGTTAATATTTGGACAATAATTCACAAATACAAACGAAACGCTACAGTGTTGCTACAGTAATTTGGCACCTCCCAAATTCCCCAAGTGAACAAGGGCGAAATCGCTCTCGATCAGCAGCCGTCGCGGTTTCTGGTCGATCGGTACTCCATGCCCGTTATGAT	287
ba2296	DEL	Chr3	22790469	22790966	GCCTAGCTAGCTCGTCCTGCCGCTCTCCGATCTCCACGAGGCATCGTCGTCATGGTCGACCCACACACAGATTCTGCTGCGCGGAAGCTTCGCGGCTGCTTCGTTTCTCAGATTTCCGGGCCGCGCCAGTGGGTACGGAGATCGATCTCTTTCTCTCCGGTCGCCGCTGATCCACGAGCCTGCACCTGCAGCAGAGGCCTATTCGCTTCAGCTTATTCAGCTAGCTTATCAGCTACCAAATAGTATTTTTCTCTCACAACAAATCAGTCGTTTCAGCTTTTCAGCCGGTTTATAAGTTGAAGCAAAAATCAGCTCTGCACGGTGCAGCTGATTTGGGACAGTACAAGGCAAATCCGCGATTAATGAGTAATGACACACACAGGTCGTCCTGCTGACGCG…	112
ba2297	DEL	Chr3	22795168	22795625	TTTACTTCACCCTAACTCTCAACTTTGGCACTATGCAAAAAGAAGATTCCCCATCACATCAAACTTGCGGTACATGCATGGAGTACTAAATGTAGGTGAAATTAAAAACTAATTGCACAGTTTTGTTGTACTTTGCGAGATGAATCTTTTAAGCCTAATTAGTCAATATTTGGACAATAATTCACAAATACAAACGAAACGCTACAGTTGCGCATTTATGGCAAAATGCCAATTTGACCGCTCCCGAATTGGGAACTAAACAAGGCACGAAAGTTCACCCTGGAATCGCACGAAAATCGGCCGTTCGTCGCCCGAATTTGCGAATCGTCCGATCCCAGCTAACTCTTTTCTCGATCGTTGCTCTCAGGCTTGTGTCGCAAACGTTTCCAGACCCTTCCG…	399
ba2302	DEL	Chr3	22888473	22888671	TTTGGAGGTGCTAAATTACTGTTACAGCACTGTAGTATATTGTAGCGTTTCGTTTGTATTTGTGAATTATTGCCCAAACATTAACTAATTAGGCTCAAAAGATTCGTCTCGCAAAGTACAACAAAACTGTGCAATTAGTTTTTGATTTCGTCTTTGCATAGTGCTAAAGTTGGGAGTTGGGGGTGAACTAAATAAGGG	220
ba2314	DEL	Chr3	23286933	23287156	CGACTAAATAAACATAGGGGGTGTTTGGGAGGAGGGGGCTAAATTTTAGCCCCCGTCACATCGAATGTTTGGACACTAATTAGGAGTATTAAACCTAGACTAATTACAAAACTAATTACACAACCCCTAGGCTAAATCACAAGATGAATCTATTAAGCCTAATTAGTCCATGATTTGACAATGTGGTGCTACAGTAACCATTCACTAATGATGGATTAATTAG	350
ba2315	DEL	Chr3	23343991	23344355	TCGAGAGAGAGAAAACTAAGGGGGTGTTTGTTTCTTTAGTCCCTCCTAAAATTTCTGTCACATCGAATGTTTAGATACTAATTAGGAGTATTAAATATAGACTAATTACAAAACTAATTGCACAGATGGAGACTAATTCACGAGACGAATCTATTAAGCCTAATTAGTTCATGATTTGATAATGTGATGCTACAGTAAACATGTGCTAATGATGGATTAATTAGGCTTAATAGATTCGTCTCGTGAATTAGCCTCCATCTGTGTAATTAGTTTTATAATTAGCTCATATTTAGTCCTCCTAATTAACCTCCGAATATTCGATGTGACATAAATTTTAGGAGGTCCTAAAGATCCAAACACCCCC	350
ba2326	DEL	Chr3	25191523	25191860	TGTTTGTTTCTTTAGTCACTCCTAAAATTCCTGTCACATCGAATGTTTAGATACTAATTAGAAATATTAAATATAGATTAATTACAAAACTAATTACACAGATGGAGACTAATTTGCGAGATGAATCTATTAAGTCTAATTAGTCCATGATTTGACAATGTGACGCTACAGTAAACATGTGCTAATGATGGATTAATTAGGCTTAATACATTCGTCTCGTGAATTAGTCTCCATCTGTGTAATTAGTTTTATAATTAGCTCATGTTTAGTCCTCCTAATTAGCCTTCGAATATTCGATGTGATATAAATTTTAGTCCGGATTAAAGATCCAAACACC	359
ba2328	DEL	Chr3	25507058	25507397	TTGGATACGAGGTGTTAAACTTTAACAGTGTCACATCGGATGTTCGGATGCTAATTAGGAGAACTAAACATGAGGTAATTATAAAACTAATTGCAGAACCCTGTGCTAATTCGCGAGACGAATCTATTAAGCCTAATTAATCCATCATTAGCAATTGGTTACTGTAGCACCATATTGTCAAATCATGGACTAATTAGGCTTAATAGATTCGTCTCGTGAATTACACTCCATCTGTGCAATTAGTTTTGTAATTAACCTATGTTTAATACTCCTAATTAGCATCCAAACATCCGATGTGACAGGTGTTAAACTTTAACACTTGATTGCCAAACACGCCCT	359
ba2331	DEL	Chr3	26063501	26063852	GGCGTTTGGATGTCAGGGGCTAAACTTTAGCCCTGTCACATCACACGTTCAGATGCTAATTAGGAGGACTAAATATGAGCTAATTAAAAAACCAATAGCAGAACCCATAGGCTAAATCGCGAGACGAATCTATTAAGCCTAATTAATCCATCATTAGCGAATGGTTACTGTAGCACCACATTGTCAAATCATGGACTAATTAGGCTTAATAGATTCGTCTCGCGATTTAGCCTAGGGGTTGTGCAATTAGTTTTGTAATTAGACTATGTTTAATACTCCTAATTAGTGTCCAAACATCCGATGTGACAGGGGCTAAAATTTAGCCCCTCCCTGCCAAACACCCCCCGTCTG	287
ba2332	DEL	Chr3	26201745	26202092	TGTTTGGATACGAGGTGCTAAACTTTAACAGTGTCACATCGGATGTTCGGATGCTAATTAGGAGGACTAAACATGAGCTAATTATAAAACTAATTGCAGAACCCTGTCCTAATTCGCGAGACGAATCTATTAAGCCTAATTAATTCATCATTAGCAAATGGTTACTGTAGCACCACACTGTCAAATCATGGACTAATTAGGCTTAATAGATTCGTCTCGCGAATTATACTCCATCTGTGCAATTAGTTTTGTAATTAGCCTATGTTTAATACTCCTAATTAGCATCTAAACATCCGATGTGACAGGTGTTAAACTTTAACAGGGTGTTGCCAAACACCCCCTTATTC	345
ba2345	DEL	Chr3	26691381	26691746	GTGTTAAAATTTAACACCCTAGTTTTAACACTTTTTAACACTTTGAGATCCAAACAGATGTGTTAAAACTTAGGTGTTAAAGTTTAACACCCCCAAAAACTTTAACACCTCAAGGGGGTGTTAAAAGTTGTTAAACTTGTTAAAAGTGGTCCCTCTCTTCACTTTTTTCCACCATTACCCCTTCTCTCTCCTTCCTCTCTCTCCGCCGGCCATAAATGAGGGGGCAATAGAGTCATTTCCCATCAAAGGTGTTAAAGTTTAACACACCATCCAAACACCCCAATGTGTTAAACTTTAGCACTCCATTTGAGAGTGTTAAAATTTTAACACTTGTTAAACTTTAACATGAGGTATCCAAACAGGCC	388
pD5103	DEL	Chr3	26859352	26859522	GACCAGCTAGGTCGCCACCGACCCCACCGTGTCGTTCGAGATGGCCATCTGGTTCTGGATAACGCCGCAGAGTCGTCCAAGCCGTCGTGACACGCCGTCATGACGGGGCAGTGGACGCCGTCGGCAGCCGACACCGCGGCGGGGATCGGAGGTTGCTGGGGTATGGCGTC	169
ba2358	DEL	Chr3	27079717	27080083	AAATTATTTAATGGGCGTTTTCTTCCCGTGTCTTATTTTTAGCACGTGTCACATCGAATGTTTAGATACTAATTAGGAGTAGTAAACGTAGACTATTTACAAAACCAATTACATAAGTGGAATCTAAACGGCGAGACGAATCTATTAAGCCTAATTAAGCCTAATTAATCCATCATTAGTAAATATTTACTGTAGCAACACATTGTCAAATCATGAACTAATTAGGCTTAATAGATTCGTCTCGCCGTTTAGATTCGTCTTATGTAATGGATTTTGTAAATAGTCTACGTTTAATACTTCTAATTAGTATCTAAACATTCGATGTGACGGGTGCTAAAGTTTAGCAAGCGGAAGAAAACAGGCCCC	359
pD5130	DEL	Chr3	27137356	27137630	ATAGGGCCTTGTTTAGTTGCCAAAGTTTGTAGGTGCCAAATTAGTATTACAGCACTGTAGCGTTTCGTTTGTATTTGTGAATTATTGTCTAAACATTGACTAATTAGGCTTAAAAGATTCGTCTCACAAAGTACAACAAAAATTGTGCAATTAATTTTTAATTTCATCTACATTTAGTACTCCATGCATGTACCGCAAGTTTGATGTGATGGTGAATCTTCTTTTTGCATAGTGACAAAGTTGTGAGTTGGGGGTGAACTAAACAAGGGCTAGG	269
ba2361	DEL	Chr3	27152995	27153136	CAAATTATAGATCGTTTTGACTTTATTAGATTCATAGATTTTGTTATGCACTTAGATATACCTTATGTCTAGATGCATAATAATATCTATGTATCTACAAAAGTCAAAACGACCTATAATTTGAAACGGAGGGAGTACTTT	158
ba2380	DEL	Chr3	27653849	27654302	TTTAGTACAGTTGCTAACTTAGGGCCTGTTTTCTTCCACTTGCTAAACTTTAGCACCCGTCACATCGAATGTTTAGATACTAATTAGGAGTATTAAACGTAGACTATTTACAAAACCCATTACATAAGACGAATCTAAACGGCGAGACGAATCTATTAAGCCTAATTAGTCCATGATTTGACAATGTGTTGCTACAGTAAATATTTGCTAATGATGGATTAATTAGGCTTAATTAGGCTTAATAGATTCGTCTCGCCGTTTAGATTCCACTTATGTAATTGGTTTTGTAAATAGTCTACGTTTACTACTCCTAATTAGTATCTAAACATTCGATGTGACACGTGCTAAAAATAAGACACGGGAAGAAAACGCCCCCTTAGATAGATAAATGAACTTAGA…	371
ba2395	DEL	Chr3	32433705	32434060	TAATCCTAAGGGGGTGTTTGGATACGAGGTGCTAAACTTTAACAGTGTCACATCGGATGTTCGGATGCTAATTAGGAGGACTAAACATGAGCTAATTATAAAACTAATTGCAGAACCCTGTCCTAATTCGCGAGACGAATCTATTAAGCCTAATTAATCCATCATTAGCAAATGGTTACTGTAGCACCACATTGTCAAATCATGGACTAATTAGGCTTAATAGATTCGTCTCGCGAATTATACTCCATCTGTGCAATTAGTTTTGTAATTAGCCTATATTTAATACTCCTAATTAGTACCCAAACATTCGATGTGACAGGTGTTAAACTTTAACAGGGGTGTTCCAAACACCCCC	347
ba2424	DEL	Chr3	41226788	41227038	CTCCCAACTTTGACACTATGCAAAAAGAAGATTCCCCATCACATCAAACTTGCGGTACATGCATGGAGTACTAAATGTAGATGAAATTAAAAATTAATTGCACAGTTTTGTTGTACTTTGCGAGACGAATCTTTTGAGCCTAATTAGTCAATATTTGGACAATAATTCACAAATACAAACGAAACGCTACAGTGTGCTACAGTGCTGTAACAGTAATTTGGCACCTCCCAAATTCCCCAACTAAACACGG	278
ba2425	DEL	Chr3	41260356	41260677	AATTTTAGCCCCCGTCACATCGAATGTTTGGACACTAATTAGGAGTATTAAACTTAGATTAATTACAAAACTAATTACACAACCCCTAGGCTAAATCGCGAGACGAATCTATTAAGCCTAATTAGTGCATGATTTGACAATGTGGTGCTACAGTAACCATTCACTAATGATGGATTAATTAGGCTCAATAGATTCGTCTCGCGATTTAGCCTAGGGGTTCTGCAATTAGTTTTGTAATTAGCTTATGTTTAGTCCTCTTAATTAGTATCCGAACATCCGATGTGACAGGGCTAAAGTTTAGCCTCCTCCTTCCAAACAGCC	346
ba2437	DEL	Chr3	42388323	42388649	AAAATCCTAACTTTGACACTATGCAAAAAGAAGATTCCCCATCACATCAAACTTGCGGTACATGTATGGAGTACTGAATGTAGACAAAATCAAAAACTAATTGCACAGTTTTGTTGTACTTTGCGAGACAAATTTTTTGAGCCTAATTAGTCAATATTTGGATAATAATTCACAAATACAAACGAAACGCTACTACAGTAATTTTGGCACCGCAAAGTTGGGCAAGGGCTTAGGCTTTGTCCGACCGCTGAGGCGCTGAGCGGTTGGAGTAGAGTAGAGTAGTCGCGTCGGCAGCTGGTGGTTGGGTACTTGCGTGATCCGATCAG	251
ba2438	DEL	Chr3	42746311	42746454	GTTCCAAATTATAGGTCGTTTTGGCTTTTATAGATACATAGATATTATTATGCATCTAGACATAGGGTATATCTAAGTACATAACAAAGTTTATGAATCTAATAAAGTCAAAACGACCTATAATTTGGGACGGAGGGAGTACT	144
pD5233	DEL	Chr3	42747816	42748098	TTGAGGCCGTGTTTAGTTGGGGAATTTGGGAGGTGCCAAATTACTGTTACAGCACTGTAGCACACTGTAGCGTTTCGTTTGTATTTGTGAATTATTGTCCAAATATTGACTAATTAGGCTCAAAAGATTCGTCTCGCAAAGTACAACAAAACTGTGCAATTAGTTTTTAATTTCATCTACATTTAGTACTCCATGCATGTACCGCAAGTTTGATGTGATGGGGAATCTTCTTTTTGCATAGTGTCAAAGTTGGGAGTTGGGAGTAACTAAACATGGCCTGAG	277
pD5246	DEL	Chr3	42801363	42801729	TCCAGAGGATGTTTGCCTCTTTCACAGGGTGTTTGAATATGAGATGCTAAACTTTAGGAAAGTCACATCGAATCGAATGCTAATTAGAAGGACTAAACATGATCTAATTATAAAATTAACTGCAGAACCCCTATACTAATTCGTGAGACGAATCTATTAAGCCTAATTAATCCATCATTAGCAAATGGTTACTGTAGCACCACATTGTCAAATCATGGACTAATTAGGCTTAATAGATTCATCTCGCGAATTAGACTCCATCTGTGCAATGGGTTTTATAATTAATCTATATTTAATACTCCTAATTAGTATCCAAACATCCGATGTGACGGGTACTAAACTTTAGGAGGTGTATCCAAACACCCC	364
ba2447	DEL	Chr3	42808283	42808658	GCACGCGCCCTCCCACACCCTGACGGTCCCGACTTGCTCATCGGTCGCTGCCGCCCGACCTCCCCACCTCCCCCTGTGCTGCCTCCTCCGCCTTCGCCCCCTGTCTCCGCCTGCTTCGCCGCCGCCCGACGTCCTGCTGGCCCCATCCCCGCTTCCTCGACCGCCGTCCTTGCCTCGCCTCCCTCAGGAGTCCACACTTGGGTGAATCTACATGTAGCGGCCACAGGGGATGTCATATCCGCCCGTCTCTAGCTGCGGATGAGGGGGCGCTGCCTAGGGTGCCGCCTACCCCCTAGGCGAGGCGGTACCCTGCCGCCCAGCGCATAAGCGCGTCTAGGCGAGCGCGAAATAGCGCCTTTTGTAACACTACTAATG	381
ba2450	DEL	Chr3	42815078	42815252	CAGAGCACAGCCCGCACAGCAGCTCAGAGAAGTCTGAAATACAGAGAACTGGGCAAAAAGAAAAGATTAACTACTCTCTTGATCCCGTCTTCATGTTGTTCCTCTTAGGAGTTCAGCGTTGTAGTCTCCAGGGGGGGGGGGGGGGGGGGGGGGGGGGGTTCATTTTTCCCCCTG	120
ba2457	DEL	Chr3	43147154	43147409	CAAATTATAAGTCATTCCAACTTTCTTGGAGAGTCAAACTATTTTATGTTTGATCAAAATTATAGAGAAAATCACACAAGTTTGTGACACCGAATAGATATACTATGAAAATATATTTAATGAAGAAACTAATGGTACCTATTTGATATCATGAATGTTAACATTTTATTGTATAAATTTGATCAAACTTGATATGCTTTGACTCTCCAAGAAAATTGGAATGACTTATAATTTGGAACGGAGGGAGTATTTAAC	268
ba2458	DEL	Chr3	43163998	43164202	CCTGACAAAAAAAAAACCTTCACCGTATTTCTATTGTTACTACAGCGGATCGGAGATTCGTAGTGCACATTGTTAACCAGCATGTGAATTCATATGAACTCATCTGAATTTACGAGTACTTCTTGAACAAGTGCAGACTTGTTCTCGAGTAGTTCAATTGCAAATCTCTCTCCTTGAAGCTGCCAAGCCTTATTGCCACTGAGT	222
pD5283	DEL	Chr3	43198530	43198897	ACCTTAGGGCAAGTACATTGCTACACGACAGCGGTCTCATAGGTCGTCTCATGCAGTGCCACGTAGGATTTTTGATGATGTGGAGGAGAGAGAGCGAGGAGAGAGAAAGAGGTCGTTGCTTCGCGAAACAACCACCTCATGAGCTAAATTGTAGGACTACGAGACAACTTAACAACCATTGTACGAGTTATTGTTGCCATGCAACTCATAATATTTTATTTTTCTTATGCACAAATTAAGGAATTATATACCACCACCAGACAACTTATAGGACAACCCATTGTATGGGTTGCCTGTTGAATCGTCTCAAGATTACGTGTCAATGCATGAGACCGCCTATTAGACAACACCAATGTACTTGCCCTTA	361
ba2461	DEL	Chr3	43203211	43203592	GGCCTGTTTTCTTCCACCTTGCTAAACTTTAGTTGCTAAAAGTTGCTAAACTTTAGTTATTAAATTTTAGCAAAGTTGTTTGGATACTCTTGCTAAAAGGCATTTAATGAGCTGTAAAAGGACCTATCTACCCTTATTAAAGGTGCGCAGGAGGGGGGAGACAAGCAATAAATGAGGGGTATATGTTGTCCAGCCTACCTTTTAGCAAGTTTTAGCAACAAAAAACTTGCTAAAGTGCTAAACTTTAGCAACTCAACTTTAGCAAGTTTTAGCAAGGGTGTTTGGCAGTTTAGCAGCTAAAAGTTACTAAAGTTTAGCAACTAAAGTTTAGCAAGGTGGAAGTAAACACCCCCTTACACATATGAGCAGAAAGAGGAAACA	352
ba2464	DEL	Chr3	43222111	43222438	GAAACTTTGCAGGTCAAGGAATTCCACCACCTTTTCAGGAGCAGACAACTCTGCTTTCAGTTGGGCCTGACTGGCAACAAAATGCACAAGTCCCCACGAATTCTCCTGACCTGTTTGAGGAGGTGATGCATATGCACAACTATTTTCATATCCATTGCCGGCATGACGCTCTGCATTCATTCTGTGCCTGCATAAAATGAGCACCACCAGACTGTTAGTTAGCTCATGGCTGCGCATTTGTTTTTGCAGTTCAACCTCTGCTCAATCCAACATTGAATCGCATCACCTTCGTCAACCCCATCAAATGGCGCCTGCTGCTCCACAAGC	344
ba2469	DEL	Chr3	43267031	43267408	TCTTATCCCCAATACCTTTTTTAGAAAAAAAAGTAAAAAATAAACTCCAACAATCCACCTAAACTTTCCCTAATTTTTTAGCGACGCTAAAAAACAGCCTGCACTGCGTATATTTTAGTGTTGGCGTTCCTCCCCCAATCCTGATTCCCGCACGCCCGCACGTCCCTTCCGATGGGCCCAATACGATGACGTGGCCTGTGTTTAAAATATTGGGGGCTATTTATTAGTGATCTTCTATGGACTGATATGTTTTTTGGGGAAATTTTTTTTGGGAGAACCCCCAATACATAGTTTTGGGAAAGAATTTTTTAGGATACTCCTGGAGTTGCTCTTAGGCACGTTCCCGAAAAGGAAAGCGACAAGAATTCAAAGTCCTT	358
ba2470	DEL	Chr3	43297642	43297955	CCCTGAGCGTGGAGAAAAGAGCATGTATGCCGAAGTGTAGGCCATGTTTAGTTCCCTCCAAACTCCCAACTTTAACACTATGCAAAAAAAAGATTCTCATCACATCAAATTTGTGGTACATGCATGGAGTACTAAATGTAGACGAAATCAAAAACTAATTGCACGGTTTTGTTGTACTTTACGAGACGAATCTTTTAAGCCTAATTAGTCAATATTTGGACAATAATTCACAAATACAAACGAAACGCTACAGTTGTGCATTTATGGCAAAATGTCAATTTTGCTACTTCCAGATTAGGAACTAAACAGGGCC	273
ba2476	DEL	Chr3	43328644	43328961	ACGAGGTGCTAAACTTTAACAGTGTCACATCGGATGTTCGGATGCTAATTAGGAGGACTAAATATGATCTAATTATAAAACTAATTGCAAAACCTTGTGCTAATTCGCGAGACGAATCTATTAAGCCTAATTAATCCATCATTAGCAATGGTTACTGTAGCACCACATTGTCAAATCATGGACTAATAGATTCGTTTCGCGAATTATACTCCATCTATGCAATTAGTTTTGTAATTAACTTATGTTTAGTACTTCTAATTAGCATCCAAACATCCGATGTGACAGGTGTTAAACTTTAATAGGGTGTTCCAAACACC	346
pD5348	DEL	Chr3	43945896	43946021	ACTGCATATGCACGAGGCTGCTGCTGCTTTGTTCATCTTGAGATGACGACGAAACTTGTTTAGGGGCCGGAATAATGCCTACTCAGCTTCTTCTTCGGCGCAAGTGAAGTAGGTGGGCCTGCTGC	123
ba2519	DEL	Chr3	44217963	44218337	ATAACCTATGTAGCTTTTATTTAGGGGCTGTTTGGATACGAGGTGCTAAACTTTAACAGTGTCACATCGGATGTTCGGATGCTAATTAGGAGGACTAAACATGAGCTAATTATAAAACTAATTGCAAAACCTTGTGCTAATTCGCGAGACGAATCTATTAAGCCTAATTAATCCATCATTAGCAAATGGTTACTGTAGCACCACATTGTCAAATCATGGACTAAGTAGGCTTAATAGATTCGTCTCGCGAATTATACTCCATCTGTGTAATTAGTTTTGTAATTAACTTACGTTTAGTACTCCTAATTAGCATCCAAACATCCGATGTGACAGGTGTTAAACTTTAACAGGTGTTTCCCAAACACCCCCTTAGA	344
ba2527	DEL	Chr3	44326740	44326929	TGACTTATTTTTAGCACGTGTCACATTGAATGTTTAGATACTAATTAGGAGTATTAAATGTAGACTATTTAGAAAACCCATTACATAAGTGGAGGCTAAATGGCGAGACGAATCTATTAAGCCTAATTAATCCATCATTAGCAAATGTTTACTGTAGGAATACATTGGCAAATCATGGACTAGGTTAGG	346
pD5402	DEL	Chr3	44376097	44376327	TATATATATATATATATATATATATATATATATATATATATATATATATATATATATATATATATATATATATATATCTCTCTCTCTCTCTCTCTCTCTCTCTCTCTCTCTCTCTCTCTCTCTCTCTCTCTCTCTCTCTCTCTCTCTCTATATATATATATATATATATATATATATATATATATATATATATATATATATATATATATATATATATATATAGAGAGAGA	228
ba2535	DEL	Chr3	44473194	44473530	TTGGATCCCCAGGCTAAATTTTAGTTCCTGTCACATCGAATGTTTGAACACTAATTAGGAGTATTAAACATAGGCTAATTACAAAACCAATTTCACAACCCCTAGGCTAAATCGCGAGACGAATCCATTAAGCCTAATTAGTCTATGATTTGACAATATGGTGCTACAGTAAACATTCGCTAATGATGGATTAATTAGGCTTAATAGATTCGTCTCGCGATTTAGTCTAGTGGTTCCGCAATTAGTTTTGTAATTAGCTCATGTTTAGTCCTCCTAATTAGCATCCGAATATCTAATGTGACACGGACTAAATTTTAGCTCCAGGATCCAAACACC	354
ba2537	DEL	Chr3	44507162	44507512	CGGACGTGTGTACTGTAGCATTACCGAAAAGTAGGAACATTAGCTTTGGTTGAATGAAAGTCGCAATTTTTTCGTTAGCTGAAACAATCGCATCCCATAAGAAGTGCCATGAGAACATTTATAATGCTGTATCACCTTAAAGTTTGCAGACATGTTCAAATCGAATCCCTATGTGGAAAAAAAAAAAAGAAAACGGCGATGTTGAGAATATACGTTAGCCATCCAATTTTTAAAAATTCCGAACGTGTGTACTGTAGCATTACCGAAAAGTAGGAACATTAGCTTTGGTTGAATGAAAGTCGCAGTTTTTTCGTCAGCTGGAACAATCGCATCTCATAAGAAGTGCCATG	230
ba2539	DEL	Chr3	44527147	44527576	TTAGCTCGACGGCACAGTAGAATTGAACAGGAGTTTTGCTCGCAGCTCGCTGCCTTTTGCGACCATAACATGCAAGAAAACTTAGGGGGTGTTTGGCAGGGAGGGGCTAAATTTTAGCCCCTGTCACATCGGATGTTTGGACACTAATTAGGAGCATTAAACATAGTTTAATTACAAAATTAATTGCACAACCCCTAGGCTAAATCGCGAGACGAATCTATTAAGCCTAATTAGTCCATGATTTGACAATGTGGTGCTACAGTAACCATTCGCTAATGATGGATTAATTAGGCTTAATAGATTCGTCTCGTGATTTAGCCTAGGGGTTCTGCTATTAGTTTTGTAATTAGCTCATATTTAGTCCTTCTAATTAGCATCCGAATGTGTGATGTGACAGGG…	350
ba2561	DEL	Chr3	45081121	45081266	CTTTGCTTATTTTTAAGCAAGTGTCACATCAATATTTAGATAGTATTAAACGTAGGCTATTTACAAAACCCATTACATAAGTGGAGGCTAAACAACGAGACGAACCTATTAAGCCTAATTAATCAAACCAGACCTTTGTTAGCGT	131
ba2562	DEL	Chr3	45097035	45097312	TATAAGTCATTCCAACTTTCTTGGAGAGTCAAACATTTTTATGTTTGACTAAAATTATAGAGAAAATCACAAAAGTTTATGACACCGAACAGATATACTATGAAAATATATTTAATGAAGAAACTAATGGTACCTATTTGATATCATGAATGTTAGCACTTTATTGTATAAATTTGGTCAAACTTGAGATGCTTTGACTCTCCAAGAAAGTTGGAATGACTTATAATTTGGAACGGAGGGAGTAGACCATATCATTCTCACGGAATTTAGTATGGGA	255
ba2563	DEL	Chr3	45111782	45112101	GATTCCAGCCAGGATTACTTCCAGGTCCGGTTTGAGTGATTCCACCCGTGTCACTCAATCCGGCCAGGATTCATTCCAGGGGTGAGGAGGTATGGTTTCAATCCGAGCCATCTAATGTAGAAGTATTCCAATCCAGGCCGATTTTCGTTCCAGATCAGACTAAAACGAACAACACTTTCAATGCAAGTCTGGTTTCAAACCGGATCACTTCAAACCACCCGGAATGGACCTCGTTCCGGGTCAATCCGGTGAAAACGAACGAGGCCTTAAGAAGTTTCTAGTAACTTATCATGAATTTAGTTAAAAATATTGGCAATAT	297
ba2567	DEL	Chr3	45206875	45207019	TAGTTCGTTACTCAATTATACTACTTGTCAGGACAGTTGGTCTATTCGGCTGGACTTATAAGTCGGCTGAAAAGCTGAAACGGTTGATTTGTTGTGAGAGAAAAATACTATTTGGTGGCTGATAAGCTGAAGCGAACATCTCTA	115
ba2574	DEL	Chr3	45337331	45337489	AATGATCATTTTTTACATCTACACAGTGAACATGATCGGAACTTTTACCTCACACAATGCATTTTTCATCAAAGAACAGTAAGACATTGCACTTGCATCAAACTCAAATAACAGTAAATCACTTGATGAATGATCAGTTTTTACATCTACACAGTGAC	123
ba2576	DEL	Chr3	45354675	45354999	CTCAGGGGGTGTTTGGATACACCCCACTAAAGTTTAGCACCAGTCACATCGGATGTCTGGATGCTCATTAGGAGTATTAAACATAGGCTAATTACAAAACTAATTGCACAGATGGAGTCTAATTCGCGAGACGAATCTATTAAGCCTAATTAGTCCATGATTTGACAATGTGGTGCTACAGTAACCATTTGCTAATGATGGATTAATTAGGCTTAATAGATTCGTCTCACGAATTAGCACAGGGTTCTGCAATTATTTTTATAATTAGCTCATGTTTAGTCCTCCTAATTAGCATCAGTTTAGCACCAAGTATCCAAACATCCC	334
ba2583	DEL	Chr3	45455081	45455525	ACGAGCGGTATAGAAATACAAAGAGTACGGCTTTTGTACTACCTTGATCTCTAGATTGCATGAATCATGATGCTATAGTTCTGCTTTTAGGTCATTGCTATTTAGGGCGTTTGGTTACTTTTGCTTATTTTTAGCACGTGTCACATCGAATGTTTAGATACTAATTAGTAGTATTAAACGTAGATTATTTATAAAACTCATTACATAAATGGAGGCTAAACGGCGAGACGAATCTATTAAGCCTAATTAAGCCTAATTAATCCATTATTAGCAAATTGTTACTGTAGCAACACATTGTCAAATCATGGATTAATTAGGCTTAATAGATTCGTCTCGCCGTTTAGCCTCCACTTATATAATGGATTTTGTAAATAGTCTACATTTAATACTTCTAATTAG…	355
ba2585	DEL	Chr3	45481433	45481838	AAGTTAATTAATCAAATTGAACGGTAGACATGTTTTTACAAGTAGACTTCCATCAAGGCCCGTTTGGTAGAGCTTCGGCTTCTCATAAAATAGTTTCGGCTTCGGCTTCTTCGGTGGAGTGACTTTTTTAGTGAAGCTGAAGCCGTTTTGCAAAACGTTTGGTAAAACGGCTTCTCAATGGCAATATACGTAATTTTATGATCACTTAATGCTTGGAGAGAGAAGCCGGTGAAGCCAGTTTTTTCGACTTCTCCTCTCTAGTGTAAGCCGTTTTGCAGCTTCTTCCCGGCTTTAGTGGTGAAGCTTTTTTGAAATTGGTCCTTTGGTAGGGCTTCACCAAAAACCGGTGGAGAAGCACTTTGAGAAGCCCTACCAAACGGGGCCTCAGTAGTCAAAATG…	329
ba2587	DEL	Chr3	45809447	45809835	TGATAGTCCGGTTGAATGGCAGAAATGCGGAACTTGGTCGAGATGACATGAACTTCGTTCTAAGCTTCTATTGAAAGCCCCAAATCTCAAAGTGTCATGAGATCCCCATACGTCTATGTCACGGTTTTTGGCTTTGGGCTGGTGGATTAATATACAGCTGAAACGTGTGGCCAAGCCATGCCCGTACGATTCATTCTCATATGTTTCTGTGCATTTTCAATATACTTTCCAATAACACATTGCCATGTTAGTATCCCCACTTTTATTATTTTTACCAAACATATGCCTAGCTTGGAATAAAATCAGGAATCAGCAAACTAACCAGCACATGTTGGTCAAAGGAAGCTTTGTGTTGTGCCGCTCGCAGCTTACTGCAGCTCATTCATCG	385
ba2588	DEL	Chr3	45813679	45813970	TAGAAGGATGGAATTGTATCCAAGGAACAGGGGATGCAAAAAGAAGTAAATAAAATTTGGTCCAAGGAACATGGGCGTGATATCGAGTTTGGAGCCATGCTAGAAGACATATGTAGTGACGTGTCCATTACCTTGATGCTTGACACCTCCACCTCGCAGATTAGTAACATATATGGAGAGCATGCGTGGATGAATAAAGATTTTACAGGGAGCGGTATATGATATCCTGTGTTCCTATACCGAGGTGCATATCACGTGGCAGGTGCTCTGCAGTTATGTCGCATCGTGTAC	243
ba2592	DEL	Chr3	45829444	45829671	TATGCGTCGGACGGTGTCGGTCTTCCTGACGGCCTGGTGCCGTCGATCGAGCGTGACACCGAGCAGGTCCCCCACAGTATAGCCTGGTCCAACACATGCTCCGCTTTTATTTTATAACATCTTCCTATTTTTTCCCCTTTTATAACATATAGTTCCTGGCCCACAAAATATAGAAACCGTTTCCTCTCACTTTTTAATCGTTGGATCTAGACTCATGGACGGCTCTT	281
ba2597	DEL	Chr3	45955241	45955586	GTGGATACCCCCGGCTAAACTTTAGCACCTGTCACATCGGATGTTTGATACTAATTAGAAGTATTAAACATAGTCTAATTACAAAACTAATTGCACAGATGGAGTCTAATTCGCGAGACGAATCTATTAAGCCTAATTAGTCCATGATTTGATAATGTGGTGTTACAGTAACTATTTGCTAATGATGGATTAATTAGCCTTAAAAGATTCATCTCGCGAATTAGACTCCATCTGTGCAATTAGTTTTATAATTAGCTCATATTTAGTCCTCCTAATTAGTATCCGAACATCTGATGTGACCCTGTTAAAGTTTAGCACCTCGTATCCAAACACTTCTGAATCACC	344
ba2604	DEL	Chr3	46074816	46074932	GTTTTCATATTACCACTTTTAGTTATAGAAGAAATATATTCGCTAAAGAAAATAAATCGGCCTTTGGTAGGAGCTTGTAGATTGGCATGTGCTTGAAACATCACAGGGTTCTCATG	111
ba2608	DEL	Chr3	46134661	46135005	GGGGGTGTTTGGGAAACCCCTGTTAAAGTTTAACACCTGTCACATCGGATGTTTGGATGCTAATTAGGAGTACTAAACATAAGCTAATTACAAAACTAATTGCACAGATGGAGTATAATTCGCGAGACGAATCTATTAAGCCTAATTAGTCCATGATTTGACAATGTGGTGCTACAGTAACCATTTGCTAATGATGGATTAATTAGGCTTAATAGATTCGTCTCGCGAATTAGCACAAGGTTCTGCAATTAGTTTTATAATTAGCTCATATTTAGTCCTCCTAATTAGCATCCGAACATCCGATGTGACACTGTTAAAGTTTAGCACCTCATATCCAAACAGCC	344
ba2619	DEL	Chr3	46503979	46504247	CTTGTATTTTGATCTATATATTTGTTGAAATGCGGCAATGGATTTGATTCTGGAGTTGACACATGGATCGACAACGCCATCAAGATGAGGGGGGTTTGATTTCAGCAACTGGGCCTGCATATTAGGGTGGTTTTTGCATGGCCTGGTTAGCTAGAGTTGGTTTTACTTGTGCAATATAGGTAACTGATAAGAGCCTGACGTGCTGCAACTGTAGCTTCGTGAGCAAATATTGAGTGATTAAGCAGTCGACAAGTCAGCCTGACATGGG	188
ba2620	DEL	Chr3	46539896	46540236	CCTGTTTGGCAACAACGTGTTAAAAGTTTAACACCCGTCACATCGGATGTTTGATGCTAATTAGGAGTATTAAATATAGGCTAATTACAAAACTAATTGCACAGATGGAGTGTAACTCGCGAGACGAATCTATTAAGCCTAATTAGTCCATGATTTGACAATGTGGTGCTACAGTAACCATTGCTAATGATGGATTAATTAGGCTTAATAGATTTGTCTCACGAATTAGCACAGGGTTCTGCAATTAGTTTTATAATTAGCTCATGTTTAGTTCTTCTAATTAGCATCCGAACATCCGATGTGACACTGTTAAAGTTTAACACCTTATATCCAAATACCC	331
ba2624	DEL	Chr3	46553909	46554227	ACTTTAGCCCTGTCACATCGGATGTTCGGATACTAATTAGGAGGACTAAACATAAGCTAATTACAAAACTAATTGCAGAACCCCTAGGCTAAATCGCGAGATGAATCTATTAAGCCTAATTAATCCATCATTAGCGAATGGTTACTGTAGCACCACATTGTCAAATCATGAACTAATTAGGCTTAATAGATTCGTCTCGCGATTTAGCCTAGGATTGTGTAATTAGTTTGTAATTAGTCTAGGTTTAATACTCCTAATTAGTGTCCAAACATTCGATGTGACGGGGACTAAAATTTAGTCCCCTCCTCCCAAACACCC	352
ba2625	DEL	Chr3	46583776	46583950	GCATTATTCAATTAAGAGGAAGTTAATACAAAGTTTGTACAACGCGGGCTGTTAACCGGGCACTCGCACACGGTATTGGAAATAGACAGGGATTACATATGCTAAAGGGGGGCGTCTAGGAGCCGAATTTAAGACATAAGAGTCGTAACGCTAGCTAGAGGTCAGGGGGCTGCC	227
ba2629	DEL	Chr3	46730086	46730457	GTCCGGACGGCTGACCGGACAGTCAAATTAGGGGCGTTTGGATGTCAGGGGCTAAACTTTAGCCCTGTCACATCACACGTTCAGATGCTAATTAGGAGGACTAAATATGAGCTAATTAAAAAACTAATAGCAGAACCCATAGGCTAAATCGCGAGACGAATCTATTAAGCCTAATTAATCCATCATTAGCGAATGGTTACTGTAGCACCACATTGTCAAATCATGGACTAATTAGGCTTAATAGATTCGTCTCGCGATTTAGCCTAGGGGTTGTGCAATTAGTTTTGTAATTAGACTATGTTTAATACTCCTAATTAGTGTCCAAACATCCGATGTGACAGGGGCTAAAATTTAGCCCCTCCCTGCCAAAC	338
ba2631	DEL	Chr3	46779349	46779628	TTGTTTAGTTCCCAATTTGGGAGTGGCAAAATTGGCATTTTGCCATAAATGTGCAACTGTAGCATTTCGTTTGTATTTGTGAAATATTGTCCAAACATTGACTAATTAGGCTTAAAAGATTCGTCTCGCAAAGTACAACAAAACTGTGCAATTAGTTTTTGATTTCGTCTACATTTAGTATTTCATGCATGTACCGCAAGTTTGATGTGATGGGGAATCTTCTTTTTGCATAGTGCCAAAGTTGGAAATTTGGGAGTAATTAAACATGGCCTCACAATC	216
ba2632	DEL	Chr3	46790760	46791000	TTATCTCAAGAAGTGCTTTCGTAAGAACTGCAAGTCACCAAACCCGTGTGCGTGCGCCCGGATAGGCCCGCGATGTACAATTCGTTTTTCTTCTTAATACAAAGATACGCAGCTCTCCTGCGTATTCACGAAAAAAAGAACTGCAATGTGATTTCGGAGAGTATCACTGAACACATGGGCGGTTGGAGTAACACTAGAGTTAGTAGAAACGAGAAAGACATGCCGGGTCCAATTTTCCAT	108
ba2649	DEL	Chr3	47024751	47025196	CTGCCATCAAAGTACTGGATCTGAAAGCTGAATGTCATTCACCACCCTCTGCATGCAATATAATCTGGGTATCTCATTAACAATGTTGTGAACCCTATTAGGGGGTGTTTGGATCCTAGAGCTAAAGTTTAGTCCGTGTCATATCGGATATTCGGGTGGTAATTAAGAGGATTAAACATGAGCTAATTACAAAACTAATTGCAGAACCCCTAGGCTAAATCGCGAGATAAATCTATTAAGCCTAATTAATCCATCATTAGCGAATGTTTACTGTAGCACCTTATTATCAAATCATGGACTAATTAGGCTTAATAGATTTGTCTTCCGATTTAGCCTAGGGGTTGTGAAATTGGTTTTGTAATTAGCCTATGTTTAAAACTCCTAATTAGTGTCCAAACA…	351
ba2650	DEL	Chr3	47025947	47026109	GCATTAGCAGGGCTGTTCGCTTCGGCTTATAAGCCGGCTGAAAAGTTGAAAGGGTTGATTTGTTGTGAGTGGAAAATACTATTTGGTGGCTGATAAGCCGACTGAATAAGCTGAAGCGAACAGGCTCGCAATCTGCCAATCTGCTTCCTGGGTGCAGTAATA	118
ba2651	DEL	Chr3	47034883	47035189	TCCTCCAGCTTTGTTTTTCCAGCAAATAGCTTTGCTTCAGCCCTTGTTTACTTGGCCAAATTGGGAGGTGCCAAATTACTGTAGCAACACTGTAGCGTTTCGTTTGTATTTGTGAATTATTGTCCAAACATTGACTAATTAGGCTCAAAAAGATTCGTCTCGCAAAGTACAACAAAACTGTGCAATTAGTTTTTAATTTCATCTACATTTAGTACTCCATACATATACCGCAAATTTGATGTGATGGGGAATCTTCTTTTTGCATAGTGCTAAAGTTGGGAGTTGGGAGTGAAGTAAACAAGAGCT	270
pD5732	DEL	Chr3	47609092	47609215	GCTTTACCCGGTACTAAATTCAAAGCCAAATTTTTTTTACAGATTTGAACACTACTGAAAAACTCAGCATTCATCCCGAGGCTCAGTACCGGGTGAAGCCTCCACCCGGTACTAAAGGGGCTC	121
ba2677	DEL	Chr3	47617709	47618011	TCAAACATGGCCGTGTTTAGTTGGGGAATTTGGGAGGTGCCAAATTACTGTTACAGCACTGTAGCACACTGTAGCGTTTCGTTTGTATTTGTGAATTATTGTCCAAATATTGACTAATTAGGCTCAAAAGATTCGTCTCGCAAAGTACAACAAAACTGTGCAATTAGTTTTTAATTTCATCTACATTTAGTACTCCATGCATGTACCGCAAGTTTGATGTGATGGGGAATCTTCTTTTTGCATAGTGTCAAAGTTGGGAGTTGGGAGTAACTAAACATGGCCATGCTCTCAAGTGTCAACTC	291
ba2678	DEL	Chr3	47618610	47618975	GTACTAAGCATTTTTTAGGGGGCGTTTGGATGTCAGGGGCTAAACTTTAGCCCTGTCACATCACACGTTCAGATGCTAATTAGGAGGACTAAATATGAGCTAATTAAAAAACTAATAGCAGAACCCATAGGCTAAATCGCGAGACGAATCTATTAAGCCTAATTAATCCATCATTAGCGAATGGTTACTGTAGCACCACATTGTCAAATCATGGACTAATTAGGCTTAATAGATTCGTCTCGCGATTTAGCCTAGGGGTTGTGCAATTAGTTTTGTAATTAGACTATGTTTAATACTCCTAATTAGTGTCCAAACATCCGATGTGACAGGGGCTAAAATTTAGCCCCTCCCTGCCAAACACCCCG	344
ba2679	DEL	Chr3	47631612	47631948	GGGGCTAAATTTTAGCCCCTGTCTCCCAAACATCCCCGGCTATAAAAGGAGCTCAGTTTCAGTTCAGGTCTATTCCTCACCTCTTCCCTGTCATTAATAGGCTAAATCGCGAGACGAATCTATTAAGCCTAATTAGTCCATGATTTGACAATGTGGTGCTACAGTAACCATTCGCTAATGATGGATTAATTAGGCTTAATAGACTCGTCTCGCGATTTAGCCTAGGGGTTCTGCTATTAGTTTTGTAATTAGCTCATATTTAATCGTCCTAATTAGCATCCAAACATCCGATGTGACAGGGCTAAAGTTTAGCCCCTGTCTCCCAAACATCCCCGG	346
ba2680	DEL	Chr3	47632979	47633308	AAAATTAGAAGTGCTAAAATTACTGTGCCGGCACTGTAGCACATTATAGCGTTTCGTTTGTATTTGTGAATTATTGTTCAAACATTGACTAATTAGGCTCAAAAGATTCGTCTCGCAAAGTACAACAAAACTGTGCAATTAGTTTTTAATTTCATCTACATTTAGTACTCCATGCATATACCGCAAGTTTGATGTGACGAGGAATCATCTTTTTGCATAGTGTCAAAGTTGGAAGTTGGGGTGAAGTAAACAAGGATTAGATTCTCAATAAAAGTAATCATGCCATGCCTTTTTCTGCATCTATTTTCAGTGAAGCTATGATTACCAAC	315
ba2684	DEL	Chr3	47699456	47699770	TCCCTGCAAGGTGGCGAATCTCTCTCACCAGTACTCTGTATACTACATACTCCCTCCGTTCCAAATTATAAGTCATTCCAACTTTCTTGGAGAGTCAAACATTTTTATGTTTGACTAAAATTATAGAGAAAATCACAAAAGTTTATGGCATCGAATAGATATATTATGAAAATATATTTAATGAAGGAACTAATGGTGCCTATTTGATATCATGAATGTTAGCACTTTATTGTATAAATTTGGTCAAACTTGAGATGCTTTGACTCTCCAAGAAAGTTGGAATGACTTATAATTTGGAACGGAGGGAGTATAAT	265
ba2687	DEL	Chr3	48138163	48138526	GGCCTTATTTTGGGGGTGTTTGGGAGGAGGGGGCTAAATTTTAGCCCCCGTCACATCGAATGTTTGGACACTAATTAGGAGTATTAAACTTAGATTAATTACAAAACTAATTACACAACCCCTAGGCTAAATCGCGAGACGAATCTATTAAGCCTAATTAGTGCATGATTTGACAATGTGGTGCTACAGTAACCATTCACTAATGATGGATTAATTAGGCTCAATAGATTCGTCTCGCGATTTAGCCTAGGGGTTCTGCAATTAGTTTTGTAATTAGCTTATGTTTAGTCCTCTTAATTAGTATCCGAACATCCGATGTGACAGGGCTAAAGTTTAGCCTCCTCCTTCCAAACAGCCCCAAAT	359
ba2688	DEL	Chr3	48153969	48154282	GGTGTTTGGCAGGAGGGCTAAATTTTAGCCCTGTCACATCGGATGTTTGCACTTATTTGGGACGTAGTAAACATTGTCTAATTACAAAAACCAAGTGCACAACCCATAGGCTAAAATCGCGAGAACGAATTCTATTATCCCTAATTAGTACATGATTTGACAATGTGGTGCTACAGTAACCATTCGCTAATGATGGATTAATTAGGCTTAATAGATTCGTCTCGCGATTTAGCCTATGGGTTCTGCTATTGGTTTTTTAATTAGCTCATATTTAGTCCTCCTAATTAGCATCTGAACGTGTGATGTGACAGGG	196
ba2694	DEL	Chr3	48718466	48718700	CATTCCAACTTTCTTGGAGAGTCAAAGCATCTCAAGTTTGACCAAATTTATACAATAAAGTGCTAACATTCATGATATCAAATAGGTACCATTGATTTCTTCATTAAATATATTTTCATAGTATATCTATTCGGTGCCATAAACTTTTGTAATTTTCTCTATAATTTTGGTCAACCATAAAAATGTTTGACTCTCCAAGAAAGTTGGAATGACTTATAATTTGGAACGGAGGGA	269
ba2696	DEL	Chr3	48723554	48723950	TTGCTAAACTTTAGTTGCTAAACTTTAGCAAAAGTTGTTTGGATACTCTTGCTAAAAGGCATTTAATGAGCTGTAAAAAGACCTATCTACCCTTATTAAAGGTGCGCAGGAGGGGGGAGACAAGCAATAAATGAGGGGTATAGGTTGTCCAGCCCACCTTTTAGCAACAAAAAACTTGCTAAAGTGCTAAACTTTAGCAACTCAACTTTAGCAAGTTTTAGCAAGGGTGTTTGGCAGTTTAGCAGCTAAAAGTTGCTAAACTTTAAAGTTTAGCAAAGTGGAACCAAACACCCCCTAAATTTGTCTCTCCAAACAAAATTCATAGTTTGTTTGGTATGCATCAGAACATAGCGACATCTTATTAGAGGCATCATCTGCTAAATTTGTCTCTCCAAA	399
ba2697	DEL	Chr3	48724818	48724957	TATTGTGGCGATACTCGGTCGTCAGGCTCCCCTCGTGTATTCTTATAAGCTTTTAGTTTGCACTCACGGAGGTCTGACCAATGGTCTCCTGGTAGTGATGTGAATGGTCATTAGTTCATTAACGGCTTCTGTATTTTCG	150
ba2710	DEL	Chr3	49098103	49098269	CAATGTTTTTTACTCCCTCCGTCCCAAATTATAGGTCGTTTTGACTTTATTAGATTCATAGATTTTGTTATGCACTTAGATATACCCTATGTCTAGATGCATAATAATATCTATGTATCTAAAAAAGTCAAAACGACCTATAATTTGGAACGGAGGGAGTATTTAT	152
ba2722	DEL	Chr3	49404432	49404691	TACTCCCAACTCCCAACTTTGACACTATGCAAAAAGAAGATTCTCCATCACATCAAACTTGCGGTACATGCATGGAGTACTAAATGTAGATGAAATTAAAAACTAATTGCACAGTTTTGTTGTACTTTGCGAGACGAATCTTTTGAGCCTAATTAGTCAATATTTGGACAATAATTCACAAATACAAACGAAACGCTACAGTGTGCTACAGTGCTGTAACAGTAATTTAGCACCCCCAAATTCGCCAAACTAAACACGG	280
ba2723	DEL	Chr3	49407595	49407873	ATTTAGGCCATGTTTAGTTACTCCCAACTCCCAACTTTGACACTATGCAAAAAGAAGATTCCCCATCACATCAAATTTGCGGTACATGCATGGAGTACTAAATGTAGATGAAATTAAAAACTAATTGCATAGTTTTGTTGTACTTTGCGAGACGAATCTTTTGAGCCTAATTAGTCAATATTTGGACAATAATTCACAAATACAAACGAAACGCTACAGTGTGCTACAGTGCTGTAGCAGTAATTTGGCACCTCCCAAATTCCCCAACTAAACACGGC	278
ba2724	DEL	Chr3	49410950	49411144	ATGCTACGTGGACGATGGCTGGGTCAAATTTTGCTGGCTCAATTTTTGCTTTTTTTAAAAAAAAATCTTTCAACGGCTTGTTCGGCTGGACTTATAAGTCGGCTGAAAAGCTGAAACGGCTCATTTATTGTGAAAGAAAAAAACTGTTCGGTGGCTGATAAGCCGGCTGAATAAGCTGAAGCGAACATGCTGGA	121
ba2726	DEL	Chr3	49539430	49539719	CGTTCAAAACAAAATCAAGGCCATGTTTAGTTACTCCCAACTTCCAACTTTGACACTATGCAAAAAGAAGATTCCCCATCACATCAAACTTGCGGTACATGCATGGAGTACTAAATGTAGATGAAATTAAAAACTAATTGCACAGTTTTGTTGTACTTTGCGAGACGAATCTTTTAAGCCTAATTAGTCAATATTTGGACAATAATTCACAAATACAAACGAAACGCTACAGTGTGCTACAGTGCTGTAACAGTAATTTGGCACCTCCCAAATTCCCCAACTAAACACG	275
ba2727	DEL	Chr3	49540253	49540581	CTAAACTTTAGCCCTGTCACATCACACGTTCAGATGCTAATTAGGAGGACTAAATATGAGCTAATTAAAAAACCAATAGCAGAACCCATAGGCTAAATCGCGAGACGAATCTATTAAGCCTAATTAATCCATCATTAGCGAATGGTTACTGTAGCACCACATTGTCAAATCATGGACTAATTAGGCTTAATAGATTCGTCTCGCGATTTAGCCTAGGGGTTGTGCAATTAGTTTTGTAATTAGACTATGTTTAATACTCCTAATTAGTGTCCAAACATCCGATGTGACAGGGGCTAAAATTTAGCCCCTCCCTGCCAAACACCCCCGT	350
ba2741	DEL	Chr3	49638569	49638830	GTTGGGGAATTTGGGAGGTGCCAAATTACTGTTACAGCACTGTAGCACACTGTAGCGTTTCGTTTGTATTTGTGAATTATTGTCCAAATATTGACTAATTAGGCTCAAAAGATTCGTCTCGCAAAGTACAACAAAACTGTGCAATTAGTTTTTAATTTCATCTACATTTAGTACTCCATGCATGTACCGCAAGTTTGATGTGATGGGGAATCTTCTTTTTGCATAGTGTCAAAGTTGGGAGTTGGGAGTAACTAAACATGG	278
ba2747	DEL	Chr3	49797027	49797168	TATGTTTGAACCGTCGCTGATGTGTTGCAGGCAAATTAAAGCGCCGATGGGATGGACTGAATTAATTCAAGCCTGAAGCATGAAGATTTGGAGTCTATACAGCGATCAATTTTGGGGTCTGTCAGGCTTGGATGTCATCAG	146
ba2752	DEL	Chr3	49847719	49848061	CGGAGGAGCTACTGATTATATTAAATACTCCCTCCATTTCAAATTGTAAGTCATTCCAAGAATCTTGAAGAGTCAAAGCATCTCAAGTTTGATCAAATTTATATGATAATATAATAACATTTATGATGTCAACTAAGTATCATTAGATTCTTTATCAATTATATTTTCATAGTATATCTATTTGATGTCATAAATCTTTATATTTTTCTCTATAATTTTGGTCAAACTTGAGGTACTTTGACTCTCCAAGATTCTTGGAATGACTTACAATTTGGAACGGAGGGAGTAATAAAGACCACGTGAACTCCAATTAATAATCATCGGTTGAACCAATTTAAACCC	280
ba2753	DEL	Chr3	49852396	49852793	CATGAGAGAAGAAGAGAGATAGGCTATGGGAATTGAATAGAAAGAGGTCGGATTAATTTCATTTCCATCAAACAACATATCCATAGCCAGATGGGGGAAGAAAGCACATGAATTTGGACAGATGGAGTCAGGAGGTCGATCGAGGGTTCTATTATTATTGATAGATCGACGAAGCAAAACACCATTTTTGGTATAACAATTATTATTGTAAAAACCACATTGGGCGATATCGATCATGAGCACGGTGTAGAAAACTTGGTCTACGGACGCCGTTCCATTAATGAATATGGTCTTCTTATCATTCTACTAGTAGTTGGTTTGAAGTGATGCTATGCTACTTGCTTGAGCTGTCAGTTCGATCAGTTCACACGCGCCCCCAACGTGCACGACGAAGATT	394
ba2754	DEL	Chr3	49853792	49854300	CATTCTTCATTTTTGTCAAGATGTGTATTGTCGGAGCTCGGACAATCCAGTTTCATTTGTTTGGTTCGACCTGAAATCTTTCTTGTCATCTACCTACGGTTCCAGGATTTAAAGCAGGCATCAGATTTACATGAGACAAATCAGCAGTCTTGCTACTGCAATATGTGCCCCTGCTTCCTTCCCTCCGCTGTTTCGGATTGTTGTTTTGCTTTCACCCAATTTCTATTGACCCAATATTGCAACGTGTCATCATATATCATTGGTATAAAAATCACTCGAGTGATGGCTAGTCACTCCCGGAGGACATCACTTGGGTTGCCATCTCCTCTTGCCTGATGAAATGAAATTGAGCACCGAGTTTCTGCGTTCGTTCCGTCTGAATCAATATAGGTCGTCGAT…	110
ba2755	DEL	Chr3	49863564	49863911	CAAGAGTACTCCAAAAAATTCTTCCCCAAAACTATGTATTGGGGGTTCTTTCAAAAAAAAATTCCCCCAAAAACATATCAATCCACAGTAGATCGCTAATAAATAGCCCCCAATATTTTAAAATAGGCCACGTCATCGTATTGGGCCCATCAGAAGGGACGCGCGAGCGTGCGGGAATCAGGATTGGGGGAGGAATGCCAACGCTAAAATATACGCGGTGGTAGGCTGTTTTTTAGCGTTGCTAAAAAATTGGGGAAGGTTTGGGTGGACTGTTGGAGTTCGTTTTTTCTCCTTTTTTCCCTAAAAAAAGTATTGGGGGTAAGATTAGCGGCCTCTTGGAGTTGCTC	340
ba2758	DEL	Chr3	49973754	49974258	GCTATACTAGCTACTCCCTTCGTCCGTTCCAAATTATAGTAGGTCCTTTTGATTTTATTAGATTCATAGACTTTGTTATGCACTTAGATATACCTTATATATGTCTAGATGCATAATAATATCTATGCATCTAGAAAAGTTAAAAATAACCTATAATTTAGGGCCTGTTTGGCTATATGGTGTTAAAGTTTAACACCCGTCACATCGGATGTTTGGATGCTAATTAGTAGCATTAAATATAGATTAGTTACAAAACTAATTGCACAGATGGAGTGTAATTCGCGAGACGAATCTATTAAGCCTAATTAGTCCATGATTTGACAATGTGGTGCTACAGTAACCATTTGCTAATGATGGATTAATTAGGCTTAATAGATTCGTCTCGCGAATTAGCACAGG…	349
ba2774	DEL	Chr3	50175184	50175502	CCTAAAATTCATGTCAGATCGAATATTCGGATGTTAATTAGGAGGACTAAATATAAGCTAATTATAAAACTAATTACACAGATGGAGACTAATTCACGAGACGAATCTATTAAATCTAATTAATCCATCATTAGCACATGTTTACTGTAGCATCATATTGTCAAATCATGGACTAATTAGGCTTAATAGATTCGTTTCGCAAATTAGTCTCCATCTGTGCAATTGGTTTTATAATTAGTCTATATTTAATACTCCTAATTAATATCTAAACATTCGATGTGACAGGAATTTTAGAAGGTGCTAAAGAAACAAACAACC	350
ba2786	DEL	Chr3	50230517	50230720	TTTGACTAAAATTATAGAGAAAATCACAAAAGTTTATGGCACCGAATAGATATATTATGAAAATATATTTAATGAAGAAACTAATGGTACCTATTTGATATCATGAATGTTAGCACTTTATTGTATAAATTTGGTCAAACTTGAGATGCTTTGACTCTCCAAGAAAGTTGGAATGACTTATAATTTGAAACGGAGGGAGTAGT	224
ba2793	DEL	Chr3	50300177	50300503	TTAAACTTTAACAGTGTCACATCGGATGTTCGGATACTAATTAGGAGGACTAAACATGAGCTAATTATAAAACTAACTGCAGAACCCCTATACTAATTCGCGAGACGAATCTATTAAGCCTAATTAATCCATCATTAGCAAATGGTTACTGTAGCACCACATTGTCAAATCATGGACTAATTAGGCTTAATAGATTCGTCTCGCGAATTATACTCCATCTGTACAATTAGTTTTGTAATTAGCTTATATTTAGTACTCCTAATTAGCATCCAAACATCCGATGTGACAGGTGTTAAAGTTTAATAGGGTGTTCCCAAACACCCCCT	346
ba2794	DEL	Chr3	50304423	50304687	TACTCCCAACTCCCAACTTTGACACTATGCAAAAAGAAGATTCCCCATCACATCAAACTTGCGGTACATGCATGGAGTACTAAATGTAGATGAAATTAAAAACTAATTGCACAGTTTTGTTGTACTTTGCGAGACGAATCTTTTGAGCCTAATTAGTCAATATTTGGACAATAATTCACAAATACAAACGAAACGCTACAGTGTGCTACAGTGCTGTAACAGTAATTTGGCACCTCCCAAATTCCCCAACTAAACAAGGCCTAA	304
ba2795	DEL	Chr3	50317889	50318214	GGGTACTAAACTTTAGAAGGGGTCACATCGGATGTTCGAACGCTAATTAGGAGGATTAAACATGAACTAATTATAAAACTAACTGCATAACCCCTATACTAATTCGCGAGACGAATCTATTAAGCCTAATTAATCCATCATTAGCAAACGGTTACTGTAGCACCACATTGTCAAATCATGGACTAATTAGGCTTAATAGATTCGTCTCGTGAATTAGACTCCATCTGTGTAATTAGTTTTGTAATTAGACTATATTTAATACTTCTAATTAGTATCCAAACATCCGATGTGATAGGTGCTTTATGAGCCTGTATCCAAACAGGCC	348
ba2797	DEL	Chr3	50319803	50319941	CCCTTTCAACTCAGATCGCCTTTCCCTGACACTCGCATAGCCTGGCTCTCCCGGCAGCATTTGTCTTCAGTAGTTATATATGCCCCGAATCCGTCCGATTCCTCCTGCTTCCTCTGATTTAGCCTTCTAGGCAAGGTA	114
ba2798	DEL	Chr3	50340788	50341151	ACACATTCAAATTATGATAGGGCCTGTTTGGCAACCACCTATTAAAGTTTAACACCCGTCACATCGGATGTTTGGATGCTAATTAGGAGTATTAAATATAGGCTAATTATAAAACTAATTGCACAGATGGAGTATAATTCGCGAGACGAATCTATTAAGCCTAATTAGTCCATGATTTGACAATGTGGTGCTACAGTAACCATTTGCTAATGATGGATTAATTAGGCTTAATAGATTTATCTCGCGAATTAACACAGGGTTCTGCAATTAGTTTTATAATTAGCTCATGTTTAGTTCTCCTAATTAGCATCCGAACATCCGATGTGACACTGTTAAAATTTAACACCTCGTATCCAAACACCC	344
pD6015	DEL	Chr3	50347617	50347947	CGGATGCGTTTGGTTCACCTGGCTTATTTTTAGTCCATGTCACATCCAAAATTCAAAATAATATGAGTTAATTATAAAACTAATGGTACAGATGGAGACTAAACGACAAAACAAATTTATTAAGCCTAATTAATCCATCATTAGCAAATGTTTACTGTAGCAACACATTGTCAAATCATAGACTAATTAGGTTTAATAGATTCGTCTCGCAGTTTAGCCTCCACTTATGTAATAGATTTTATAAATAATCTACGTTTAATACTTCTAATTACTATCTAAACATTCGATGTGACGAGTGCTGAAAATAAGTCAAAGTAACCAAACGGGGCT	329
ba2803	DEL	Chr3	50462906	50463192	GCACGGAGCTTTATGTTGGATTTTTAAGTTAGGTTTGGCCCATTTATTTCTAATTAAATCAATTAAAAAAATCAAAGGCTCATCATGTATTGAAAGTTGACCCCTACCTGGTAATGTTGTAATGTTGCTGATGAACTCTCTCGATCGAATGTAATCGGTTGTTAACCATGGTTGCTCTGCTTTTGCTATGTTGTGCTCTGCTCTCGCCTCTATAGTTTTGCCAAATTCAGATGGACACTATCATGAAATTTGGTGTCACAAAACAGCAAAATAATAGTAATATATA	208
ba2809	DEL	Chr3	50524938	50525268	GGTGCTAAACTTTAACAGTGTCACATCGGATGTTCGGATGCTAATTAGGAGGACTAAACATGAGCTAATTATAAAACTAATTGCAGAACCTTGTGCTAATTCGCGAGACGAATCTATTAAGCCTAATTAATCCATCATTAGCAAATGGTTACTGTAGCACCACATTGTCAAATCATGGACTAATTAGGCTTAATAGATTCGTCTCGCGAATTATACTCCATCTGTGCAATTAGTTTTGTAATTAGCTTATATTTACTACTCCTAATTAGCATCCAAACATCCGATGTGACAGGTGTTAAACTTTAACAGGTGTTTCCCAAACACCCCCTA	356
ba2811	DEL	Chr3	50539205	50539612	TACTCTTGAGTTGGAAAAGAGTTCTAAATAGCGTTCTAAATAGCGGGCTAAGAGCAACTCCAAGAGTATCTAAAAGATTCTTCCCCAAAACTATGTATTGGGGGTTCTCCCAAAAAAAAATTTCCCCCCAAAAACATATCAGTCCACAGCAGATCGCTAATAAATAGCCCCTAATATTTCAAACCCAGACCACATCATCGTATTGGGCCCATCGGAAGGGACACGCGGGCGTGCGGGAATCAGGATTGGGGGAGGAACGTCAACGCTAAAATATACGCGGTGGCAGGCTGTTTTTTAGCGTCGCTAAAAAATTGGGGAAGGTTTAGGTGGATTGTTGGAGTTCATTTTTTCTCTCTTTTTTCCTAAAAAAGATATTGGGGGTAAGATTAGCAGCCTCTT…	379
ba2816	DEL	Chr3	50606165	50606819	TTTATTTTCATAACCCTTTTAGTTAACTTATTCTATGACCACTGGTACTATTCACATGCGGCTCCTAGAGTGGATATCTGCGGCGAGTTAGTGATACTTAGCTTCGCAAAAAAAGAAGAATTAGTGATACTTAGGCTTCAAGGTTGGACCCTATTAGAGTATGTATACTCATGTTTCTTGTACACCAAGCCTATATGGCTATATATATGAAAGGTCACCCCCCTCCAAGGGCGTGCGGTGTTTCCTATCTCTCTACATGGTATCATGAGTCCGGGTACCCCCTGATTCGTCCACCCTTCTGCTGCCCTAGCCGCCATGCGCTTCGCACGCGTGCCACCCACCAGCAACACCGATCCTCCTGGCACCGCCTTCTCCACCCCCTGCCGATCCAATCTGATC…	111
ba2831	DEL	Chr4	373789	373912	GACCCGCCTAGGCGAACAGGTTCAATGCAACCAAATTAAGTAGGGTTTATTAATCAGCAATTTTATGCTAACGGATAGCTCTATGTGGAATCTGTAGCGGTACTAGAGTGTGAGTGACACATG	109
ba2836	DEL	Chr4	462184	462415	CTTTAATACGATATTTGATTTGTAACAAATGATACTATATTCTAACATGTGTAGAGTCAGGGGCGAATCTAGGGTCCGGGCTGCCCGGGCTGCAGCTCGGGGTGAGATCATGGAGTCCATTTAACATATGTGGTGTTTAACCTAATAAAATGAGGCTTAGGAGACAAGATTAGACTGTTTTGGGCGTGATTCAACAGCTCAGCCCGGGGCGCAGCCCCGTTCTGAATCCGC	187
ba2837	DEL	Chr4	470613	471126	CTTGATGCGCTTCCTTTCTGACGAGGCTATGTCCGAGATTGAGTTGCCAAGATTCTAAAGGTACTTGTCTCTGTGCTTTTCTTCCACTGCGTAGCTGGTGATCTTCAACATTGTCTATGTGCTTTTTCTAGGAAAAACAATATTGCTGTATGAGTTGCCCATTGATGTGGCATAGACTGAATAAATAAGCATTAAACATTTTCTAATGCCGGCTGAAAAGCTGAAACGGCTGATTTATTATGAGAGAAAAATACTGTTCGGTGGCTGATAAGCTGGCTGAATAAGCTGAAACAAACACGCCGACTAATGTTAAGAGTCCTAGTTCTGGTGTTAAGAAGTCATGTCCTTTTTGGATGGTCTCTAGTGCTATTAGGAGTACTCCACTACTGTGCACCTGCA…	101
pD6106	DEL	Chr4	493960	494336	ACTAAGGCTAGTCCCAGTGCATGATTTCATTGTACTGTTTCCAAGGATGTCACATCATCTCATGAGATGTATTCTCATGAATGAAACGGGGAGTTCCAGTGCACAGTTTCATTTCACGATTTCATAGGATGCCCATGACATTTAATTGTGAGGCATGTGATTGGATATGGTTAGATGAAATGAAACTCTATAGCCCCCAATGCAAGTTTGAATAGGTTTCATAGTCTTGGAAACAGTGTATACACAGTTTTATCCTGATGAAACTCCTTCCCTCTCTCACTTCATAACTACCATGCCATGTCATCACATATGCTGATGTGTCACCGTATTTAATGTGCATGAAACCTCTATGAAATTCCCACTGGGATTAGCCTAA	371
ba2846	DEL	Chr4	666264	666375	CGGATCCACGCACGGCCCGATGCACACGCTCCCCATCCTCTGGTGCATGCTGTTTGCTGCACCTGCCGACTGCCGTCGGCTTGAGCTCCTGGCTCAGCTATGGCCGAAGGG	118
ba2853	INS	Chr4	874787	874830	TCTTCTAAAGACAAGACATAAGTATGAGGGACTATTCTAGAGA	137
ba2877	INS	Chr4	1156285	1156382	ACTTCCAGCTTTCCTCATGTTTGCTTCTAGTAGTGTGCAATTGAACGTGGATCCATAATCGGAACTTTGTTTCAAATTCCTCTCCCTGTTTTTTTTT	107
ba2879	DEL	Chr4	1166231	1166563	CATTCCCGTCAGATGAGCGTTAGTCACATTTCTATCAGATGGCGCATCTCTCTACCGTCGAAGCGTTCTACACCGACGACCTGCCTGCCTGCCGCCGCGTCGACCGCTCGACGCACCACTGCATGCACGCACTGCACCAGACACCGCTCCTCCATGCAAACGTCCTCTTCCACGCCATTCTTCTCTTGAATTGCAGCAGCCAGCAGTATATGATCTGGCATTTTTGTTCATGCTTATGTTACTAATGGTCATGCTAGTTGCATTGCTCACACCTAAGTTGCTCGTCAAATGTACCATTTAAGCTAGCATGGTCCTTGCTTGCCACATTGTTG	328
ba2897	DEL	Chr4	1443468	1443741	TGTTTAGTTACTCCCAACTCCCAACTTTGACACTATGCAAAAAGAAGATTCCCCATCACATCAAACTTGCGGTACATGCATGGAGTACTAAATGTAGATGAAATTAAAAAGTAATTGCATAGTTTTATTGTACTTTGCGAGATGAATCTTTTGAGCCTAATTAGTCAATATTTGGACAATAATTCACAAATACAAACGAAACGCTACAGTGTGCTACAGTGCTGTAACAGTAATTTGGCACCTCCCAAATTCACCAACTAAACAAGGCCTCAC	281
ba2899	DEL	Chr4	1476922	1477252	TGTTAAAGTTTAACACCCGTCACATCGAATGTTTGGATGCTAATTAGGAGTATTAAACATAGACTAATTACAAAACTAATTGCACAGATGGAGTGTAATTCGTGAGACGAATCTATTAAGCCTAATTAGTCCATGATTTGACAACGTGGTGCTACAGTAACCATTTGTTAATGATGGATTAATTAGGCTTAATAGATTCGTCACGTGAATTAGCACAGGATTATGCAATTAGTTTTATAATTAGCTCATGTTTAGTTCTCCTAATTAGCATCCGAACATCCGATGTGACACTGTTAAAGTTTAGCACCTCGTATCCAAACACCCCCTTAG	363
ba2900	DEL	Chr4	1589379	1589705	AAAGTTTAACACCCGTCACATCGGATGTTTGGATGCTAATTAGAAGTATTAAATATAGACTAATTACAAAACTAATTGTACAGTTGGAGTGTAATTGGCGAGACGAATCTATTAAGCCTAATTAGTCCATGATTTGACAATGTGGTGCTACAGTAACCATTTGCTAATTGTGGATTAATTAGGCTTAATAGATTCGTCTCGCGAATTAGCACAGGGTTCTGCAATTAATTTTATAATTAGCTCATGTTTAATTCTTCTAATTAGCATCCGAACATCCGATGTGACACTGTTAAAGTTTAGCACCTCGTATCCAAACACCCCCTCAA	345
ba2910	DEL	Chr4	1725413	1725738	GGTTAAATTTTAGCCCCCGTCACATCGAATGTTTGGACACTAATTAGGAGTATTAAACCTAGACTAATTACAAAACTAATTACACAACCCCTAGGCTAAATCGCAAGACGAACCTATTAAACCTAATTAGTCCTTGATTTGACAATGTGGTGCTACAGTAACCATTCACTAATGATGGATTAATTAGGCTTAACAGATTCGTCTCGCGATTTAGCCTAGGGGTTCTGCAATTAGTTTTGTAATTAGCTTATATTTAGTCCTCCTAATTAGTATCCGAACATCCGATGTGACAGGGCTAAAATTTAGCCTCCTCCTTCCAAACACC	351
ba2913	DEL	Chr4	1827963	1828213	TCCCAACTTTGGCACTATGCAAAAAGAAGATTCCCCATCACATCAAACTTGCGGTACATGCATGGAGTACTAAATGTAGATGAAATTAAAAACTAATTGCACAGTTTTGTTGTACTTTGCGAGACGAATCTTTTGAGCCTAATTAGTCAATGTTTGGACAATAATTCACAAATACAAACGAAACGCTACAGTGTGCTACAGTGCCAGCACAGTAATTTGGCACCTCCCAATTTAGCCAACTAAACAAGGC	281
ba2917	DEL	Chr4	2242375	2242757	AAAATTCTTCCCCAAAACTATGTATTGGGGATTCTCCTAAAAAAAATTTCCCCCAAAAACATATCAGTCCACAGCAGATCGCTAATAAATAGCCCCTAATATTTCAAACACAGGCCAAGTTATCATATTGGGCCCATCGGAAGGGACGCGCGGGCGTGCGGGAATCAGGATTGGGGGAGGAACGCCAACGCTAAAATATACACGGTGGCAGGCTGTTTTTTAGCGTCGCTAAAAAATTGGGGAAGGTTTAGGTGGATTGTTGGAGTTCATTTTTTCTCTCTTTTTTCCTAAAAAAAGTATTGGGGGTAAGATTAGCAGTCTCTTGGAGTTGCTCTTACAAACGAAAAACAGATGGCACGCAGTGCGCTACGTCACCTCCAAG	363
ba2918	DEL	Chr4	2426212	2426510	GTTTAGTTGGCAAAATTGGGAGTGCCAAAATTACTGTGCTGGCACTGTAGCATACTGTAGCGTTTCGTTTGTATTTGTGAATTATTGTCCAAACATTGACTAATTAGGCTCAAAAGATTCCTCTCGTAAAGTACAACAAAACTGTGCAATTAGTTTTTAATTTCATCTACATTTAGTACTCCATGCATGTACCGCAAGTTTAATGTGATGAGAAATCTTCTTTTGGCATAGTGACAAAGTTGGGAGTTGGGGATGAACTAAGTTGGGAGTTGCGTACAACGTGATATGTCCCGGACGG	326
ba2922	DEL	Chr4	2484323	2484774	AACCAAGCAGTCTGCCTTTATTTCTTGCACTCTATATGCATTTAAAGTTCAAAACTACAATTCAATAAACTTTTCATGTAAAATGCAAGGCCCCGTTTGGATCCCTTCATTTTGAAGGAATTGGAATCTACTTAATGGAGTAGGCTAATTTATCTTGGAATGTTGCATTCCACAACTTTCCAAAGTTTAGATATAAACCTATCTTAAATTCGGTGGGAGATGGAAATTAATTCTATAGATTATGATTATTAGAATGGAATTCAATTCTTATAGCATGCTCTTGGACTCGCTTCCCTATAGCAGAAGTGCAGCACATAAGTATTTCTCCCATATCGCCAACAATAATATACAAATATATTCCACATACAATTATATTAGCTTAATTAATTTGTGTCTAAA…	378
ba2925	DEL	Chr4	2500369	2500568	TCCGGCTCCGTGCGCTTACCGAAGCACGGAGGAGCCGGAGCCGCACCAAACGGCATTGACCACGGAGCCATTTTTTGACACATTTAGGAGGAGCCGGAGCCGTTTTAGGCCTGCATGGAGGAGCCCAAAAAAGTGGCTCCGCGGCTCCGGCTCCGGCTCCGCACGAGGAGCCCCTCGCGAGGAGCCCTGCCAAAGGAGC	228
ba2930	DEL	Chr4	2545229	2545516	CTATTGCGCTGTACGGTCATGAACTTTGTGGGTTCTAGATTATCTGCAAAGGAAAAATCTCTGTCCAGCTTGCCCAACGTTTGTCGCCCTGGCTATTATAGTGCGATTATTTTTTTAATTGTATATACTCTCCTTTTTCCTGCTATCTGACTGCGGTTCTTCTCAGAGAAACGAGTTCCTGTCCACAAACTGGAAAAAAAAAAGGGAAAAGATGAAAATGACTAAAAACAGGAGGAGAGCTTGAGAGTATGCACCTCAGTCTCACGAAAATTTCAATCTAGCTCCCA	278
pD6287	DEL	Chr4	3359041	3359169	GAGTAGGGTTTTCTATCTAGCTAAACAGATCTAATCCTATCATGAAGCATGAATTGCATATAAAGGTAAACCCAATCGTGAGATAAGTATTATAGACAGGGTAAACAGATCACATCCATATATATAAG	125
ba2946	DEL	Chr4	3383700	3384054	TAAGCCCCGTCTCCGTAGCCTCCAAAATGCAAAAAAACCCCCGCCGCTCAGCAATAAAGGAGGAAAGAGAAGATGAGCGTCGCCTCACCACGCGACGGCCCGAGCTCGTGCTCCCAGGCCAAGACGCTGGCTCGCCACGCGTTGTACGGAGGTGTCGCCTCGCTTCGTCGCCTCGCGGATCCAGCTGCGCGCGCGAGAGAGGTGAAGATTGCCGCCAAAATCCGAGCATTAAAACACTTGCAGACAACTAAACAGACAGCCTCTGTCTGTGGGTTGTACGTAGTGTCTGTTTACCCGTCTGTATTGTTGATCCCAATAACATACAGACAGGAGGCTGTCTCACCGTTGTACATA	369
ba2947	DEL	Chr4	3396553	3396951	CGTAAATCTATGGGGCTGTTTGGATACGAGGTGCTAAACTTTAACAGTGTCACATCGGATGTTTGGATGCTAATTAGGAGGACTAAACATGAGCTAATTATAAAACTAATTGCAGAACCTTGTGCTAATTCGCGAGACGAATCTATTAAGCCTAATTAATCCATCATTAGCAAATGGTTACTGTAGCACCACATTGTCAAATCATGGACTAATTAGGCTTAATAGATTCGTCTCGCGAATTATACTCCATCTGTGCAATTAGTTTTGTAATTAGCTTATGTTTAGTACTCCTAATTAGCATCCAAACATCCGATGTGACAGGTGTTAAACTTTAACAGGTGTTTCCCAAACACCCCCTATGTATCACAATGGTACAAGTTTTAAGGGCCGCATATGTA	339
ba2950	DEL	Chr4	3499859	3500221	GGGCTGTTTGGATACAAGGTGTTAAACTTTAACAGTGTTACATCGGATGTTCGGATACTAATTAGGAGGACTAAACATGAGCTATTATAAACTAACTGCAGAACCCCTATACTATTCGCGAGACGAATCTATTAAGCCTAATTAATCCATCATTAGCAAATGGTTACTGTAGCACCACATTGTCAAATCATGGACTAATTAGGCTTAATAGATTCGTCTCGCGAATTATACTCCATCTGTACAATTAGTTTTGTAATTAGCTTATATTTAGTACTCCTAATTAGCATCCAAACATCCGATGTGACAGGTGTTAAAGTTTAATAGGGTGTTCCCAAACACCCCCTTAGTCTTCATTTATATCA	345
ba2954	DEL	Chr4	3980150	3980417	GTTAGTTACCCCAACTCCAACTTTAACACTATGCAAAAAGAAGATTCCCCATCACATCAAATTTGCGGTACATGCATGTAGTACTAAATGTAGACGAAATTAAAAACTAATTGCACAGTTTTGTTGTACTTTGCGAGACGAATCTTTTAAGCCTAATTAGTCAATATTTGGACAATAATTCACAAATACAAACGAAACGCTACAGTGTGCTACAGTGCTGGAACAGGAATTTTGCATCTCCCAAATTGGCCAACTAAACAAGACCCT	274
ba2961	DEL	Chr4	4059506	4059955	TTGCCTCTCAAACTAAAAAATCATGTGAAAACTCAATAATGCCAAGTATTGTTAACCTAACCGAATAGTATATCTTACATTGATTATTGTACGTGATCATGAGATCTTTGAATTGTCTTTTAACCCGAATCCTGTGCAAATAGCGTATTTTGGAGTTTGTGGAGTTAGACGTGTTTGGCAGGAAGTTTTGTGAAGTTGATGGAGTGAAGCTATTTTTTCTAGAGTGGAATGCTGCCAAACATCCTCTAATCTCTTATCCACTGAGGATATTCTGCATGTGTCGAAGGCCAAGACCAAAGCGTGAAAGAAATGACTGGTATATGTCACCTTGCGCGCTCATGTTCTGTCTAATTCCCACACACTTCACTTTGATATTTTAGAAAGAACACTTAATGAGAA…	100
ba2965	DEL	Chr4	4083044	4083445	GATTAAAGCTAAGCACCTGCATCAGCGACCACCTTGCCTTCTTTTCCATTTTCTTAGGGCGCAACCATGTGTTAAAGTTTAACACCTGTCACATCGGATGTTTGGATGCTAATTAGAAGTATTAAATATAGGCTAATTACAAAACTAATTGCACAGATGGAGTGTAATTCACGAGACGAATCTATTAAGCCTAATTAGTCCATGATTTGACAATGTGGTGCTACAGTAACCAATTGCTAATGATGGATTAATTAGGCTTAATAGATTCGTCTCGCGAATTAGCACAGGGTTCTGCAATTAGTTTTATAATTAGCTCATGTTTAGTTCTCCTAATTAGTATCCAAACATCCGATGTGACACTGTTAAAGTTTAACACCTCGTATTCAAACACCCCCTTAG…	340
ba2971	DEL	Chr4	4205679	4205826	CGTTAGCCAAACAGGTTCATAGCTTCCTATTTTCCTGGAGTTGGTGGAGTGGAGCTACAAAAAGGTGGAGTTGGTGGAGTGGAGCTGTTTTTTTTTTAGTGGAGCAGTCCCAAACACGCCCTATATCTAGCTTAGCTAAAATATACA	111
ba2975	DEL	Chr4	4234100	4234390	TGGGAGGTGCCAAATTACTGTTACAGCACTGTAGCACACTGTAGCGTTTCGTTTGTATTTGTGAATTATTGTCCAAATATTGACTAATTAGGCTCAAAAGATTCGTCTCGCAAAGTACAACAAAACTGTGCAATTAGTTTTTAATTTCATCTACATTTAGTACTCCATGCATGTACCGCAAGTTTGATGTGATGGGGAATCTTCTTTTTGCATAGTGTCAAAGTTGGGAGTTGGGAGTAACTAAACAGGGCCCAAGCTGTGTGCGTGTGTGTGGACCTAGGAGGGAGACT	279
ba2976	DEL	Chr4	4237325	4237647	GAGTGCATCGAACAGGGAAAGCTGGCCTTGTTTAGTTGGTCAAATTGGAAGATGCAAAATTACTGTACCAGCACTGTAGCACACTGTAGCATTTCGTTTGTATTTGTGAATTATTATCCAAATATTGACTAATTAGGCTCAAAAGATTCGTCTCGCAAAGTACAACAAAACTGTGCAATTAGTTTTTAATTTCGTCTACATTTAGTACTCCATACATGTACCGCAAGTTTGATGTGATGGAGAATCTTCTTTTTGCATAGTGTCAAAGTTGGAAGTTGGGAGGTAACTAGACATGGCCCTAGAGCAGGATTTGTGACAAGTA	284
ba2980	DEL	Chr4	4429893	4430258	GGGCGTTTGGATGTCAGGGGCTAAACTTTAGCCCTGTCACATCACACGTTCAGATGCTAATTAGGAGGACTAAATATGAGCTAATTAAAAAACCAATAGCAGAACCCATAGGCTAAATCGCGAGACGAATCTATTAAGCCTAATTAATCCATCATTAGCGAATGGTTACTGTAGCACCACATTGTCAAATCATGGACTAATTAGGCTTAATAGATTCGTCTCGCGATTTAGCCTAGGGGTTGTGCAATTAGTTTTGTAATTAGACTATGTTTAATACTCCTAATTAGTGTCCAAACATCCGATGTGACAGGGGCTAAAATTTAGCCCCTCCCTGCCAAACACCCCCTGAGTAAATTTCACTCGCA	346
ba2981	DEL	Chr4	4476229	4476583	ATTTATGGGGTGTTTGGGAGGAGGGAGCTAAATTTTAGCCCTGTCACATCGGATGTTCGGATGTTAATTAGGAGGACTAAACATAAGCTAATTACAAAACTAATTACAGAACCCCTATGCTAAATCGCGAGACGAATCTATTAAGCCTAATTAATCCATCATTAGTGAATGGTTACTGTAGCATCACATTGTCAAATCATAGACTAATTAGGCTTAATAGATTCGTCTCGCGATTTAGCCTAGGGGTTGTGTAATTAGTTTTGTAATTAGTCTAGATTTAATACTCCTAATTAGTGTCCAAACATTCGATGTGACGGGGGCTAAAATTTAGCCCCCTCCTCCCAAACACCCCCT	361
ba2982	DEL	Chr4	4480763	4481097	CTTATTTTTAGCACGTGTCACATCGAATGTTTAGATACTAATTAGGAGTAGTAAACGTAGACTATTTACAAAACCAATTACATAAGTGGAATCTAAACGGCGAGACGAATCTATTAAGTCTAATTAAGCCTAATTAATCCATCATTAGCAAATATTTACTGTAGCAACACATTGTCAAATCATGGACTAATTAGGCTTAATAGATTCGTCTCGCCGTTTAGATTCGTCTTATGTAATGGGTTTTGTAAATAGTCTACGTTTAATACTTCTAATTAGTATCTTAACATTCGATGTGACGGGTGCTAAAGTTTAGCAAGTGGAAGAAAACAGGCTC	360
ba2983	DEL	Chr4	4481836	4482118	CGTAGGGGTAAGGCCTTGTTTACTTCCCAACTTGGGAGTGGCAAAATTAGTACTTTGCCATAAATGCGCAACTGTAGCGTTTCGTTTGTATTTGTGAATTATTGTCCAAATATTGACTAATTAGGCTCAAAAGATTCATCTCGCAAAGTACAACAAAACTGTGCAATTAGTTTTTGATTTCATCTACATTTAGTACTTCATGCATGTACCGCAAGTTTGATGTGATGGGGAATCTTCTTTTTGCATAGTGTCAAAGTTGGGAGTTGGGAAGAAACTAAACAT	279
ba2986	DEL	Chr4	4796852	4797176	TAAATTGGAGGGAGAAATAATCTTCTAAAATGGAGAGTAACTAGCTAGGGCCATGTTTAGTTACTCCCAACTTCCAACTTTGACACTATGCAAAAAGAAGATTCCCCATCACATCAAACTTGCGGTACATGCATGGAGTACTAAATGTAGATGAAATTAAAAAGTAATTGCACAGTTTTGTTGTACTTTGCGAGACGAATCTTTTGAGCCTAATTAGTCAATATTTGGACAATAATTCACAAATACAAACGAAACGCTACAGTGTGCTACAGTGCTGTAACAGTAATTTGGCACCTCCCAAATTCGCCAACTAAACAAGGCCTA	280
ba2987	DEL	Chr4	5083562	5083897	GGATACGAGGTGTTAAACTTTAACAGTGTCACATCGGATGTTCGGATGATAATTAGGAGAACTAAACATGAGCTAATTATAAAACTAATTGCAGAACCCTGTGTTAATTCGCGAGACGAATCTATTAAGCCTAATTAATCCATCATTAGCAAATGGTTACTGTAGCACCACATTGTCAAAATCATGGACTAATTAGGCTTAATAGATTCGTCTCGTGAATTATACTCCATCTGTGCAATTAGTTTTGTAATTAGCCTATATTTAATACTCCTAATTAGCATCCAAACATCCGATGTGACGGGTGTTAAAGTTTAACAGCTGGTTGCCAAACAGGC	349
ba3001	DEL	Chr4	5290893	5291209	ACTTTAACAGTGTCACATCGGATGTTCGGATGCTAATTAGGAGGACTAAATATGAGCTAATTATAAAACTAATTGCAGAACCTTGTGCTAATTCGCGAGACGAATCTATTAAGCCTAATTAATCCATCATTAGCAAATGGTTACTGTAGCACCACATTGTCAAATCATGGACTAATTAGGCTTAATAGATTCGTCTCGCGAATTATACTCCATCTGTGCAATTAGTTTTGTAATTAGCTTATGTTTAGTACTCCTAATTAGCATCCAAACATCCGATGTGACAGGTGTTAAACTTTAACAGGGGTTTCCCAAACAC	350
ba3008	DEL	Chr4	5592645	5592991	GGGTGTTTGGGAAACACCTGTTAAAGTTTAACACCTGTCACATCGGATGTTTGGATGCTAATTAGGAGTAGTAAACATAAGCTAATTACAAAACTAATTGCACAGATGGAGTATAATTCGCGAGACGAATCTATTAAGCCTAATTAGTCCATGATTTGACAATGTGGTGCTACAGTAACCATTTGCTAATGATGGATTAATTAGGCTTAATAGATTCGTCTCGCGAAATTAGCACAAGGTTCTGCAATTAGTTTTATAATTAGCTCATGTTTAGTCCTCCTAATTAGCATCCGAACATCCGATGTGACACTGTATAAAGTTTAGCACCTCGTATCCAAACAGCCCC	356
ba3012	DEL	Chr4	5722760	5723102	TCCTAAAAAATTCTTCCCCAATACATAGTATTGGGGGTTCTCCTAAAAAAAATTTCCCCCAAAAACATATTAGTCCACAGCAGATCGCTAATAAATAGCCCCCAATATTTCAAACACAGGCCACGTCATCGTATTGGGCCCATCGGAAGGGACGCGCGGGCGTGCGGGAATCAGGATTGGGGGAGGAACGCCAACGCTAAAATATACGCGGTGGCAGGCTGTTTTTTAGCGTCGCTAAAAAATTGGGAAGGTTTAGGTGGATTGTTGGAGTTCATTTTTTCTCTCTTTTTTCCTAAAAAAGGTATTGGGGGTAAGATTAGCAGCCTCTTGGAGTTGCTCTGA	352
ba3015	DEL	Chr4	5886007	5886486	TCCCATTTTCTTGAGCGAAGTAAAGCCGCTAAAGTGAAGCTTCCGTCAAAATTCATCTGCTCATGGAAGCAATCCGTTTTCTGGTTAAAAGCATCTGGTACAAATATTCTCCTCTCATCTGGTACAAATATTCGTCAGAATCCCGCACTTTTGCACTTCAACCCCTCTCTTTTTTTTGAAAGGAACGGCAAAAGCTTTGCCGTAAATTTTATTAGAAGAGAAAAAAGGAAAAAAGAACAAGTCTGTACAACAGGAGTCTGTACAACAGGCAGTATCCCATCCACTTCGACCCCTCTCATCTGCCACAAATATTCTCTTCTCCTCCCCATCGACCTCGCACACCACCGCGGACCACGGGCACCACCACCTGCTCGGAGAGGCTTTAAACCCTCGCACGCT…	126
ba3017	DEL	Chr4	5904106	5904229	ACATTCAAGCTGTAACTGTTGGTGTACTATGTGTATTAGGGCCCAATAGGCCCATGTAAGACATCTACATAGCTACCCTCTAGGGTTAGCCCATAATCTATCTATTACCTTATAGTAGTAACC	118
ba3018	DEL	Chr4	5908677	5909018	TTGGGAAACACCTGTTAAAGTTTAATACCTGTCACATCGGATGTTTGGATGTTAATTAGGAGTACTAAACATAAGCTAATTACAAAACTAATTGCACAGATGGAGTATAATTCGCGAGACGAATCTATTAAGCCTAATTAGTCCATGATTTGACAATGTGGTGCTACAGTAACCATTTGCTAATGATGGATTAATTAGGCTTAATAGATTCGTCTCGCGAATTAGCACAGGGTTCTGCAATTAGTTTTATAATTAGCTCATGTTTAATCCTCCTAATTAGCATCCGAACATCCGATGTGACACTGTTAAAGTTTAGCACCTCGTATCCAAACAGCCCCTAA	331
ba3020	DEL	Chr4	5973918	5974278	TACGTGGCGTTTGGATGCCACGGGCTAAACTTTAGCCCTGTCACATCACACGTTCGAATGCTAATTAGGAGGATTAAATATGAGCTAATTATAAAACTAATAGCAGAACCCCTAGGCTAAATCGCGAGACGAATCTATTAAGCCTAATTAAATTAATCCATCATTAGCGAATGGCTTTTGTAGCTCCACATTATCAAATCATGGACAAATTAGGCTTAATAGATTCGTCTCGCGATTTAGCCTAGGGGTTGTGCAATTAGTTTTGTAATTAGACTATGTTTAATACTCCTAATTAGTGTCCAAACATCCGATGTGACAGGGGCTAAAATTTAGCCCCTCCTGGCCAAACACCCCCATATG	376
pD6422	DEL	Chr4	6078615	6078785	AACTAGAAAAACAGGTAAAACCTACAATTCTAGTAAATATCGATAACTAGTGAATAAATCTAAACGAAACAACAGCGATGCGCCCGAAGTTAAAGCTTAGAATTTACTCGGTAAACGGAACTTACAAGATCGGCCGGAGATCAAGTTGTTGCAGCCCTGCCAACCCGTAC	169
ba3023	DEL	Chr4	6129056	6129431	CTTCAGTTATAACAAGTTTGTAAGCCTATTCAACTCTTGGCTCCCACCTTTCCCTGTCTATTCAGATAAAACCATAACACTCATAGGGAAAAGATTGTAAGGCCTTGTTTAGTTGGCCAATTTGGGAGGTGCCAAATTACTGTTACAGCACTGTAGCACACTGTAGCGTTTCGTTTGTATTTGTGAATTATTGTCCAAATATTGACTAATTAGGCTCAAAAGATTCGTCTCGTAAAGTACAACAAAACTGTGCAATTACTTTTTAATTTCATCTACATTTAGTACTCCATGCATGTACCGCAAGTTTGATGTGATGGGGAATCTTCTTTTTGCATAGTGTCAAAGTTGGAAGTTGGGAGTAACTAAACATGGCCT	284
ba3038	DEL	Chr4	6177202	6177619	TTAAACTTTAACAGTGTCACATCGGATGTTCGGATGCTAATTAGGAGAACTAAACATGAGCTAATTATAAAACTAATTGCAGAACCCTGTGCTAATTCGCGAGACGAATCTATTAAGCCTAATTAATCCATCATTAGCAATTGGTTACTGTAGCACCACATTGTCAAATCATGGACTAATTAGGCTTAATAGATTCGTCTCGTGAATTACACTCCATCTGTGCAATTAGTTTTGTAATTAGTCTATGTTTAATACTTCTAATTAGCATCCAAACATCCGATGTGACAGGTGTTAAATTTTAACACATGGTTGCCAAACAGGCCCTAAGGTTTTTGTGTGGGGTTTTGGTGCAGGTGCAGGACTGCAAGCTCATGCTCATGAGCTCATCCAGAGTTATCT…	348
ba3039	DEL	Chr4	6196311	6196628	CTTTAACAGTGTCACATCGGATGTTCGGATGCTAATTAGGAGGACTAAACATGAGCTAATTATAAAACTAATTGCAGAACCCTGTCCTAATTCGCGAGACGAATCTATTAAGCCTAATTAATTCATCATTAGCAAATGGTTACTGTAGCACCACACTGTCAAATCATGGACTAATTAGGCTTAATAGATTCGTCTCGCGAATTATACTCCATCTGTGCAATTAGTTTTGTAATTAGCCTATGTTTAATACTCCTAATTAGCATCTAAACATCCGATGTGACAGGTGTTAAACTTTAACAGGGTGTTGCCAAACACCC	357
ba3040	DEL	Chr4	6220574	6220945	CTTTTTCATTAGCACAAAGTTAGGTGGTGTTTGGATCCTGGAGCTAAAGTTTAGTCCGTGTCACATCAGACATTCAAATGCTAATTAGGAGGACTAAACATGAACTAATTACAAAACTAATTGCAGAACCCCTAGGCTAAATCGTGAGACGAATCTATTAAGCCTAATTAATCCATCATTAGCGAATGTTTACTGTAGCATCATAGTGTCAAATTATGGACTAATTAGGCTTAATAGATTCGTCTCGCGATTTAGCCTAGGAGTTGTGAAATTGGTTTTGTAATTAGCCTATATTTAATACTCCTAATTAGTGTCCAAACATTCGATGTGACAGGGGCTAAAATTTAGCCCGGGGATCCAAACACCCCTTA	332
ba3031	DEL	Chr4	6224193	6224494	CCAACTCCCAACTTTGACACTATGCAAAAAGAAGATTCCCATCACATCAAACTTATGGTACATGCATGGAGTACTAAATGTAGATAAAATTAAAAACTAATTGCACAGTTTTGTTGTACTTTGCGAGACGAATCTTTTGAGCCTAATTAGTCAATATTTGGACAATAATTCACAAATACAAACGAAACACTACAGTGTGCTACAGTACCGGCACAGTAATTTTGGCACCTCCAATTTTAACAACTAAACAAGGCCTAGAACGCTGATCCTTGTGCTTGTAGGAATCAGTTATGTAGCTATG	271
ba3043	DEL	Chr4	6235710	6236053	TGTTTGGCAACCAAGTGTTAAAGTTTAACACCCGTCACATCGGATGTTTGGATGCTAATTAAGAGTATTAAATATAGGCTAATTACAAAACTAATTGCATAGATGGAGTGTAATTCGCGAGACGAATCTATTAAGCCTAATTAGTCCATGATTTGACAATGTGGTGCTACAGTAACCATTTGCTAATGATGGATTAATTAGGCTTAATAGATTCGTCTCGCGAATTAGCACAGGGTTCTGCAATTAGTTTTATAATTAGCTCATATTTAGTTCTTCTAATTAGCATCCGAACATCCGATGTGACACTGTTAAAGTTTAACACCTCGTATCCAAACACCCCCTA	350
ba3048	DEL	Chr4	6335199	6335470	AAAGTTGGGAGGTGCCAAATTACTGTTACAGCACTGTAGCACACTGTAGCGTTTCGTTTGTATTTGTGAATTATTGTCCAAACATTGACTAATTAGGCTCAAAAGATTCGTCTCGCAAAGTACAACAAAACTGTGCAATTAGTTTTTAATTTCATCTACATTTAGTACTGTATGCATGCACCGCAAGTTTGATATGATGGGGAATCTTCTTTTTGCATAGTGCTAAAGTTGGAAGTTGGGGGTGAAGTAAACAAGGGCCTCGGTTGATCCC	280
ba3052	DEL	Chr4	6516774	6516922	TTATTCAGCCGGCTTATCAGCCACCAAACAGTATTTTCCTCTCACAACAAATCAGCCGTTTCAGCTTTTCAGCCGGCTTATAAGCTGAAGCGAACAGACCCTTAATCTTTCGAAGGTGCTTATAGAGGTAGGGTTGCGTGTATGTTCG	119
ba3056	DEL	Chr4	6611823	6611950	CAGCTTATTCAGTCGACTTATCAGCCACCAAACAGTGTTTTCCTCTCACAATAAATCAGCCGTTTCAGCTTTTCAGCCGGCTTATAAGCTGAAGCGAACAGACCTTGTCATCTTTGATTAACAATTA	118
ba3057	DEL	Chr4	6642093	6642416	TCGTTTGGATACACAATGCTAAACTTTAGCACAGTGCTAAACTTTAGCATCCTCAAATGGACTGCTAAAGTTTAACACTTGGGGTTGTTTGGATACAATGCTAAAGTTTAGCACCTTGGGTGAGAAATGACTACATTGCCCTCATTTATGACTGCTTGGGGAAAAGTGGAGAGGAGAGAGAGGGGACAACTAGGGAAAAAGTGGGCTTGGGGACCACTTTTAGCACCCATTAGCACTTGGGTGTGCTAAAAAAATAAGGATGCTAAACTTTAGCACCTCACTTTTAGCACACTTTTAGCACTTGACCTCCTTTCCAAACACCC	329
pD6493	DEL	Chr4	6664971	6665255	GCTTAGGCCTTGTTTAGTTGGCCAAATTGGGAGATGCCAAATTACTGTGCCAGCACTGTAGCACACTGTAGCGTTTCGTTTGTATTTGTGAATTATTGTCCAAATATTGACTAATTAGGCTCAAAAGATTCGTCTCGTAAAGTACAACAAAACTGTGCAATTAGTTTTTAATTTCGTCTACATTTAGTATTTCATGCATGTACCGCAAGTTTGATGTGATGGGGAATCTTCTTTTTGCATAGTGCCAAAGTTGGGTGTTGGGAGGTAACTAAACATGGCCTTAG	278
ba3061	DEL	Chr4	6689567	6689968	AGCGTGGAATCCAACTTGGCATTCCACGCCCTCGGTGCCTGCCGCAGGCCATAGAGGGCCTTGCGCAAGCGCAGCACCTTGCCCTCCTTGCCTGGGATCGCAAAACCCGGCGGCTGGTGCACGTAGACCTCCTCCTTCAAGTCGTCGTTAAGAAACACCGACTTGACGTCCATGTGATGAACGCGCCAGCCTTCCTGGGTGGCCAGCGCAAGGAGGAGTCGCACGGACTCCATCCGTGCCACGGGGACGAAAGCATCGTCGAAGTCGATCCCTTCCTGCTGCACGAACCCACGTTCCACCAAGCGAGCCTTGTGCTTAACGATGGCACCGGCTTCATCCCTCTTCAGCTTGAACACCCACTTAAGGGTGATCACGCGGTAACCACGAGGGAGGTCAGCA…	325
pD6495	DEL	Chr4	6697938	6698295	TCCTAAGGGGTGTTCGGAAGGAGAGGGTTAAACTTTAGCCCTGTCACATCGAATGTTCGGATACTAATTAAGAGAACTAAACATAAGCTAATTACAAAATTAATTGCAGAACCCCTAGGCTAAATCGCGAGACGAATCTATTAAGCCTAATTAATCCATCATTAGTGAATGGTTACTGTAGCACCACATTGTCAAATCATGGACTAATTAGGCTTAATAGATTCGTCTCGAGATTTAGCCTAGGGTTTGTGTAATTAGTTTTGTAATTAGTCTAGGTTTAATACTCCTAATTAGTGTCCAAACATTCGATGTGACGGGGGCTAAAATTTAACCCCCTCCTCTCAAACACCCCCTAAG	350
ba3035	DEL	Chr4	6711344	6711742	AGAGCTTTGGGGTTAGTCAAAAGGATATTGGAGAAAACCCAATCATTCCTAGGGGGCGTTTGGATGTCAGGGGCTAAACTTTAGCCCTGTCACATCACACGTTCAGATGCTAATTAGGAGGACTAAATATGAGCTAATTAAAAAACCAATAGCAGAACCCATAGGCTAAATCGCGAGACGAATCTATTAAGCCTAATTAATCCATCATTAGCGAATGGTTACTGTAGCACCACATTGTCAAATCATGGACTAATTAGGCTTAATAGATTCGTCTCGCGATTTAGCCTAGGGGTTGTGCAATTAGTTTTGTAATTAGACTATGTTTAATACTCCTAATTAGTGTCCAAACATCCGATGTGACAGGGGCTAAAATTTAGCCCCTCCCTGCCAAACACCCC	344
ba3064	DEL	Chr4	6729925	6730210	TCCCAACTTTGACACTATGCAAAAAGAAGATTCCCCATCACATCAAACTTGCGGTACATGCATGGAGTACTAAATGTAGACGAAATTAAAAACTAATTGCACAGTTTTGTTGTACTTTGCGAGACGAATCTTTTAAGCCTAATTAGTCAATATTTGGATAATAATTCACAAATACAAACAAAACGCTACAGTGCTGTAACAGTAATTTGGCACCTCCCAAATTTGCCAAGTAAACAAGGGCCTAATGGCCTCCATGGTATCTTGCTGGTGTAGAGGACATGAAAT	264
ba3065	DEL	Chr4	6730480	6730725	GACATTACCGATAATTTTTAACCTTTTTTATTATTTTGCTATTTCATCCTCGTTTTACTCCAGATGTTGCCACTCAGATATGTTGATCATTTAGTTCATCCACAATTTAAAGTTAGGACCAATTTTATGAATCTGCGATGTTGCTACTCAATTATGTGTTATGAATCGATAACTTAGCTTGTTAAAAAACTTACCCTTCAAATTTTTTGAATATCCATGCTTGAAATCTTAGGACCACCCCCTCT	115
ba3067	DEL	Chr4	6812281	6812596	CAACAGCCTTGTTTAGTTGTTAAAGTTGGGAGGTGCCAAATTACTGTTACAACACTGTAGCACACTGTAGCGTTTCGTTTGTATTTGTGAATTATTATCCAAACATTGACTAATTAGGCTCAAAAGATTCGTCTCGCAAAGTATAACAAAACTATGCAATTAGTTTTTAATTCCGTCTACATTTAGTACTCCATGCATGCACCGTAAGTTTGATGTGATGGGGAATCTTCTTTTTGCATAGTGCCAAAGTTGGGAGTTGGGGGTGAAGTAAACGGGGCCAAGCAATATTGGTCGAACTTGATAGATTTGACCTCT	275
ba3069	DEL	Chr4	6830619	6830939	TCCAGTTGTTTCTTTTAGTCTTAACTTTTAGTTGACTAAAATTTCAGGCCATGTTTAGTTACTCCCAACTCCCAACTTTGACACTATGCAAAAAGAAGATTCCCCATCACATCAAACTTGCGGTACATGCATGGAGTACTAAATGTAGATGAAATTAAAAACTAATTGCACAGTTTTGTTGTACTTTGCGAGACGAATCTTTTGAGCCTAATTAGTCAATATTTGGACAATAATTCACAAATACAAACGAAACGCTACAGTGTGCTACAGTGCTGTAACAGTAATTTGGCACCTCCCAAATTCCCTAACTAAACAAGGCC	272
pD6523	DEL	Chr4	6907258	6907540	TTTTGGCCATGTTTAGTTACTCCCAACTCCCAACTTTGACACTATGCAAAAAGAAGATTCCCCATCACATCAAACTTGCGGTACATGCATGGAGTACTAAATGTAGATGAAATTAAAAACTAATTGCACAGTTTTGTTGTACTTTGCGAGACGAATCTTTTGAGCCTAATTAGTCAATATTTGGACAATAATTCACAAATACAAACGAAACGCTACAGTGTGCTACAGTACTGTAACAGTAATTTGGCACCTCCCAAATTCCCCAACTAAACACGGCCTTTG	277
ba3084	DEL	Chr4	6926879	6927069	TCCTAAACTTTAGCACATGTCACATCGGATATTTAGATACTAATTAGAAGTATTAAATATAATCTAATTATAAAACTAATTGCACAGATGGAGTCTAATTCGCGAGACGAATCTATTAAGCCTAATTAGTCCATGATTTGACAATAGGAATCCTGGTTCATTATTCTTCAACTCATCTTATCTCCGCTAC	205
ba3087	DEL	Chr4	6966984	6967444	ATATATGTTTCTATGATTTTTGCATTAATTCTTTTTTTACTCAAGTCAGTAGCCCAATCAAACTCTAGCATGCTAATGCTACTCATGTGCTCTAAGGCTAGTCCCAGTGCAAGGTTTCATTGCACTGTTTCCAAGGATGCCACATCATTCCATGAGGTGTATTCTCATGAATGAAATAGGGAGTCCCAATGCACAGTTTCATTTCACAATTTCATAGGATGCCCATAACATTTAATTGTGAGGCATGTGATTGGATATGATTAGATGAAATGAAACTCTATAGCCCCCAATGCAAGTTTCAATAGGTTTCATAGTCTTGGAAACCGTGTATACACAGTTTCATCCTGATGAAACTCCTTCCCTCTCTCACTTCATAACTATCATGCCATATCATCACAT…	363
ba3089	DEL	Chr4	7012577	7012830	CCCAACTTTGACACTATGCAAAAAGAAGATTCTCCATCACATCAAACTTGCGGTACATGCATGGAGTACTAAATGTAGACGAAATCAAAAACTAATTGCACAGTTTTGTTGTACTTTGCGAGACGAATCTTTTGAGCCTAATTAGTCAATATTTGGATAATAATTCACAAATACAAACGAAACGCTACAGTATCACATTTATGGCAAAATGCCAATTTGGCACCTCCCAACTTGGGAAGTAAACAAGGACGAG	274
ba3072	DEL	Chr4	7100158	7100272	CTTGATTGCTAAGAAAGTAAGGAGGTGTTTGTTTCTTTAGTCCCTCCTAAAATTTCTATCACATCGAATGTTTAGATACTAATTAGAAGTATTAAATATAGACTAATTACAAAA	351
ba3095	DEL	Chr4	7102329	7102720	GTCACATCGAATGTTCGGATGTTAATTAGAAGAATTAAACATGAGTTAATTATAAAACTAATTGCAGAACCCTGTGCTAATTCACGAGATGAATCTATTAAGCCTAATTAATCCATCATTAGCAAATGGTTATTGTAGCACAACATTGTCAAATCATGGACTAATTAGGCTTAATAGATTCGTCTCGCGAATTACACTCTATCCGTGCAATTAGTTTTGTAATTAGCCTATATTTAATACTCCTAATTAGCATCCAAACATCCGATGTGACGGGTGTTAAACTTTAACACCGTGTTGCCAAACAGGCCCTAAGTTATGTCTTTACGTGCATGTGAAAGACGTTGATAAGCTTTCGAGCCAACAAGCTAATTGTAAATTGTACTTGTGCATC	323
ba3096	DEL	Chr4	7103228	7103550	GTGTTAAACTTTAACAGTGTCACATCGGATGTTCGGATGATAATTAGGAGAACTAAACATGAGCTAATTATAAAACTAATTGCAGAACCCTGTGTTAATTCGCGAGACGAATCTATTAAGCCTAATTAATCCATCATTAGCAAATGGTTACTGTAGCACCACATTGTCAAAATCATGGACTAATTAGGCTTAATAGATTCGTCTCGTGAATTATACTCCATCTGTGCAATTAGTTTTGTAATTAGCCTATATTTAATACTCCTAATTAGCATCCAAACATCCGATGTGACGGGTGTTAAAGTTTAACAGCTGGTTGCCAAAC	343
ba3099	DEL	Chr4	7146346	7146754	GTTTGGATTCGAGGTGCTAAATTTTATGAGGGTCACATCGAATGTTCGGACGCTAATTAGGAGGACTAAATATGAGCTAATTATAAAACTAACTGCAGAACTCCTATACTAATTCGCAAGACGAATCTATTAAGCATAATTAATCCATAATTAGCAAATGGTTACTGTAGCACCACATTGTCAAATCATGGACTAATTAGGCTTAATAGATTCGTCTCGCGAATTAGACTCCATCTATGCAATTAGTTTTATAATTAGACTATATTTAATACTTCTAATAGTATCCAAACATCCACAGGTACTAAAGTCTAGGAGTTGTTATCCAAACACCCCCTTATTCATACTCAAATCCAAATATATATTATCAATTCTCACCTTCTCCATTCTCACCCATATCTA…	354
ba3106	DEL	Chr4	7280800	7281108	TTTTGTCTCGCCCTGTGGAGTTGGGCCATGTTTAGTTCACCCCCAAATTCCAACTTTGACACTATGCAAAAAGAAGATTCCCCATCACATCAAACTTGTGGTACATGCATGGAGTACTAAATGTAGACGAAATCAAAAACTAATTGCACAGTTTTGTTGTACTTTGCGAGACGAATCTTTTGAGCCTAATTAGTCAATATTTGGACAATAATTCACAAATACAAACGAAATGCTACAGTGTCGCTACAGTATTTTGGTTGTCCCAATTTGGGCAACTAAACAAGGCCTTGTTTGTGCCGCGGCAGCAG	266
ba3110	DEL	Chr4	7351512	7351850	CCAAGTGTTAAAATTTAACACCTGTCACATCGGATGTTTGGATGCTAATTAGGAGTATTAAATATAGGCTAATTACAAAACTAATTGCACAGATGAAGTGTAATTCACGAGACGAATCTATTAAGCCTAATTAGTCCATGATTTGACAATGTGGTGCTACAGTAACCAATTGCTAATGATGGATTAATTAGGCTTAATAGATTCGTCTCGCGGATTAGCACAGGGTTCTGCAATTAGTTTTATAATTAGCTCATATTTAGTTCTCCTAATTAGCATCCGAACATCCGATGTGACACTGTTAAAGTTTAACACCTCGTATCCAAACACCCCCTAAGGCT	334
pD6585	DEL	Chr4	7355358	7355484	TCTACGGCCTGTTCGCTTCAACTTATTTAGTCGGCTTATCAGCCACCAAACAGTGTTTTTCTCTCACAAAAAATCAGCCGTTTCAGCTTTTCAGCCGGCTTATAAGCTGAAGCGAACAGGCCCCTA	122
ba3112	DEL	Chr4	7385618	7385978	CACGGAAATTTGCGGGGCGTCGGAGGAGTTATTCGCGTCGCTGAATTTTTGCGGGGAGCACAGGGGAGCTATTGGAGGCTCAATTTTAATGTTTTTCTCCCTAATTAAGGTCTTGGGAATAATAAAAGGGAGCTTTTTGGAGTTGCTCTTGATCACTTGCAAAGCATCCAGTAAGGCAAGTTCCTGAAAATGAGAGATCCATGGACGAAGTTTCAATGGAGAATCTAAAGGCGACTTGTGCAGATGTGTGATTGCCTTGTTCTTCTGTTGCCATATTGGTCTTGGTCACACACTGAACCACCAACGTTGCTGGGAAGATGATATCTATTCACGGGGGAATGCAAATGAGGGGAAAAAAAA	392
pD6589	DEL	Chr4	7388108	7388464	GAGCAACTCCAAGAGGCTGCTAATCTTACCCCCAATACCTTTTTTAGGAAAAAAGAGAGAAAAAATGAACTCCAACAATCCACCTAAACCTTCCCCAATTTTTTAGCGACGCTAAAAAACAGCCTGCCACCGCGTATATTTTAGCGTTGGCGTTCCTCCCCAATCCTGATTCCCGCACGCCCGCGCGTCCCTTCCGATGGGCCCAATACGATGACGTGGCCTGTGTTTGAAATATTGGGGGCTATTTATTAGCGATCTGCTATGGACTAATATGTTTTTGGGGGAAAAATTTTTTAGGAGAACCCCCAATACATAGTTTTGGGGAAGAATTTTTTAGGATACTCTTGGAGTTGCTC	355
ba3117	DEL	Chr4	7406815	7407188	TGTCTTAGCGTGGGTTTGGCTGGGAGTCAATGTGGAACGTGACAGGGTCTGGATGGTCCTATTTTGGTGTTTGATTGGAGTGATGGACGAGGAATGAGACGGATGGCGTTTCCGTGCCGTTAGCTGTGGATCCCGTTTGTCATTCACTCAAAGTTGCGGAGCCCAGCTGTCAGCTGCTCGGAACAGAGGACGGCCATGGCGGCAACCCGGCGTGCTCTGCGCCACCCGCCCCGGCCTGCTCTGCTGCTCGCCTTGGCCTGCTCCGCCGCTCTCCTGCCCTGGCTTGCTCTGCGCCTCCGCCCAAGCCTGATTCGTCCCCATCTGTCGAGGCCGTGGCGGAAGCAAGGTGGGCTCGCGGATTGGGGCGGCCGCA	380
ba3120	DEL	Chr4	7426440	7426691	GGGAGGTGCCAAATTACTGTTACAGCACTGTAGCACACTGTAGCGTTTCGTTTGTATTTGTGAATTATTGTCCAAATATTGACTAATTAGGCTCAAAAGATTCGTCTCGCAAAGTACAACAAAACTGTGCAATTAGTTTTTAATTTCATCTACATTTAGTACTCCATGCATGTACCGCAAGTTTGATGTGATGGGGAATCTTCTTTTTGCATAGTGTCAAAGTTGGAAGTTGGGAGTAACTAAACATGGCC	287
ba3124	DEL	Chr4	7446965	7447335	CGAGGTGCTAAACTTTAACAGTGTCACATCGGATGTTCGGATGCTAATTAGGAGGACTAAACATGAGCTAATTATAAAACTAATTGCAGAACCCTGTCCTAATTCGCGAGACGAATCTATTAAGCCTAATTAATTCATCATTAGCAAATGGTTACTGTAGCACCACACTGTCAAATCATGGACTAATTAGGCTTAATAGATTCGTCTCGCGAATTATACTCCATCTGTGCAATTAGTTTTGTAATTAGCCTATGTTTAATACTCCTAATTAGCATCTAAACATCCGATGTGACAGGTGTTAAACTTTAACAGGGTGTTGCCAAACACCCCCTTAACTGAGAAAGAGCGGATGGGCAAATGGGCAAATGGG	350
ba3127	DEL	Chr4	7549485	7549812	AATTCCATCCTAATAATCATAATTTAGACACAAATTAATTAAGCTAATATAATTGTATGTGGAATATAGTTGTATATTATAGTTGGTGATATGGGAGAGATACTTGTATGCTGCACTTCTACTATAGAGAAGCGAGTCTAAGAGCGTGCTATAAGAATTGAATTCCATTCTAATAACCATAATCTATACAATCAATTTCCATCTCCCACCCCATGAATTTAAGATAGGCTTATATCTAAACTTTGGAAAGTTGTGGAATGCCACATTCCAACATAAATTAGCCTACTCCATAAATAGATTCCAATTCCTTGGACCCAAACGGAGCCT	316
ba3138	DEL	Chr4	7689542	7689889	GGCAACCAAGTGTTAAAATTTAACACCTGTCACATCGGATGTTTGGATGCTAATTAGGAGTATTAAATATAGGCTAATTACAAAACTAATTGCACAGATGAAGTGTAATTCACGAGACGAATCTATTAAGCCTAATTAGTCCATGATTTGACAATGTGGTGCTACAGTAACCAATTGCTAATGATGGATTAATTAGGCTTAATAGATTCGTCTCGCGGATTAGCACAGGATTCTGCAATTAGTTTTATAATTAGCTCATATTTAGTTCTCCTAATTAGCATCCGAACATCCGATGTGACACTGTTAAAGTTTAACACCTCGTATCCAAACACCCCCTTAGTTTTGAT	344
ba3140	DEL	Chr4	7757795	7758176	GGTGCTAAACTTTAACAGTGTCACATCGGATGTTTGGATGCTAATTAGGAGGACTAAACATGAGCTAATTATAAAACTAATTGCAGAACCTTGTGCTAATTCGCGAGACGAATCTATTAAGCCTAATTAATCCATCATTAGCAAATGGTTACTGTAGCACCACATTGTCAAATCATGGACTAATTAGGCTTAATAGATTCGTCTCGCGAATTATACTCCGGCTGTGCAATTAGTTTTGTAATTAGCTTATGTTAATTACTCCTAATGAGCATCCAAACATCCGATGTGACAGGTGTTAAACTTTAACAGGTGTTTCCCAAACACCCCTTAGATTGTAAACCCTGGCTCCGTCGCAAGTTGTGTGCCTGCGTGAAGCCAGAC	349
ba3141	DEL	Chr4	7768085	7768394	CTCGCATTGGCCAGCTGTGCTCCATGACAAGTGCCTAAGGCCCTGTTTAGTTACTCCCAACTCCCAACTTTGACACTATGCAAAAAGAAGATTCCCCATCACATCAAACTTGCGGTACATGCATGGAGTACTAAATGTAGATGAAATTAAAAACTAATTGCACAGTTTTGTTGTACTTTGCGAGACGAATCTTTTGAGCCTAATTAGTCAATATTTGGACAATAATTCACAAATACAAACGAAACGCTACAGTGTGCTACAGTGCTGTAACAGTAATTTAGCACCCCCAAATTCGCCAAACTAAACACG	289
ba3155	DEL	Chr4	8921547	8921939	TGTTGGATTCTGGTGGAGTGGTGAACTGGTGAGGTGAACACTAAGGGGCTGTTTGGAAGGAGGAGGCTAAACTTTAGCCCTGTCACATCGGATGTTCGGATACTAATTAAGAGGACTAAACATAAGCTAATTACAAAACTAATTGCAGAACCCCTAGGCTAAATCGCGAGACGAATCTATTGAGCCTAATTAATCCATCATTAGTGAATGGTTACTGTAGCACCACATTGTCAAATCATGCACTAATTAGGCTTAATAGATTCGTCTCGCGATTTAGCCTAGGGGTTGTGTAATTAGTTTTGTAATTAATCTAAGTTTAATACTCCTAATTAGTGTCCAAACATTCGATGTGACGGGGGCTAAAATTTAGCCCCCTCCTCCCAAACACCCCC	347
ba3156	DEL	Chr4	8930724	8931245	CACATCACCTACCGCAGGCATAAGCGTGATGGTTGGAACTTCCACGCCTCAATCATTTACGCTGAATGCAAAATTCTTGTCAATCATTGCAGGTCTAATGTGGATGTGTCACAGAAGCATGACGAAAGAGAAGCGGCACCGAATAATGTGGCAGCTCAGCTTCACGCACAGTGATGCTTCATTAAACACGAATGCTTGGATAAATGGGGCTGTTCGCTTCAGCTTATAAGCCGGCTGAAAAGCTGAAACGGCTGATTTGTTGTGAGAGGAAAATACTGTTTGGTGACTGATAAGCCGACTGAATAAGCTGAAGCGAACAGGCCGAATATATTTGGAGGTTAGTAGCTTTGAAAACAGCAGAAAGGTGTCTCACTTTTCGTGGGACCTTGGATTAGGATG…	126
pD6632	DEL	Chr4	9011646	9011997	TCTTACGGTCTGTTTTCTTCTACTTGCTAAACTTTAGCACCCGTCACATCGAATGTTTAGATACTAATTAGGAGTATTAAACGTAGACTATTTACAAAACCCATTACATAAGACGAATCTAAACGGCGAGACGAATCTATTAAGCCTAATTAGTCCATGATTTGACAATGTGTTGCTACAGTAAATATTTGCTAATGATGGATTAATTAGGCTTAATTAGGCTTAATAGATTCGTCTCGCCGTTTAGATTCTGGTTTTGTAAATAGTCTACGTTTACTACTCCTAATTAGTATCTAAACATTTGATGTGACACATGCTAAAAATAAGACACGGGAAGAAAACGCCCCCTTA	346
ba3160	DEL	Chr4	9966362	9966616	ATTTGGGAGGTGCCAAATTACTGTTACAGCACTGTAGCACACTGTAGCGTTTCGTTTGTATTTGTGAATTATTGTCCAAATATTGACTAATTAGGCTCAAAAGATTCGTCTCGCAAAGTACAACAAAACTGTGCAATTAGTTTTTAATTTCATCTACATTTAGTACTCCATGCATGTACCGCAAGTTTGATGTGATGGGGAATCTTCTTTTTGCATAGTGTCAAAGTTGGGAGTTGGGAGTAACTAAACATGGC	276
ba3161	DEL	Chr4	10001988	10002868	CTCAACCTTGGTAACGGTGCTATAAAACTGTGTACTGAGACTGGTCTAAGGATGATGGCTTGATGATACGACTTATTTTAACATAGCACAGATGCATATGTCTACGTAATAAATATATATGTACCCAATGCTATGAATACACGCCCATAATAAGTCTTAACAATTTTTATATAGTAATGTTGATTGGCACTATGGTTACACATATGGTAACATAGCACATGCACATGTAGGAAGGGTAATCAGAGCACAGTTGGTAATCAGAGCTTTCGGTGATAGATTCTTGAATTAGTTTTTTTCCTTAAAATTGACTTAATAAAACCTGACACACATGCACATGTAGGAAGGGTAATTGCTTGCTTACCTTTTTATTTGAGGTGTTAATTTGTTTTAATTCCATGT…	114
ba3163	DEL	Chr4	10107448	10107624	CTCTAATACTAGCATATACTAACCTTAAATTCTAGAATGCTCTGAACCAATAACCTTCTGACGACTAATTTGCAACAACAATCGACCAGTAGGACCTTCAACCTGTTCGCTTTAGCTTATCAGCCGACTTATCAGCCACCGAACAGTATTTTTCTCTCACAATAAATCAGCCGTTT	103
ba3166	DEL	Chr4	10118122	10118333	TAGTTTTTGCACTATAAATAAGTACTCCCAAATTATAGGTCGTTTTAGCTTTTTTAGATTCATAGATATTATCATACATCTAGACATACACTATATCTAGATGCATAATAATATCTATGAACCTAGAAAAGCCAAAACGATCTACAATTTGGAACGGAGGGAGTATCGTTTTAGTTCCTTGGGGAATTCTGTCCGCTAAATGCGGCCCTAG	143
pD6717	DEL	Chr4	10867369	10867716	GGGCCTGTTTGGCTCCATGGTGTTAAAGTTTAACACCCGTCACATCGAATGTTTGGATGCTAATTAGGAGTATTAAACATAGACTAATTACAAAACTAATTGCACAGATGGAGTGTAATTCGTGAGACGAATCTATTAAGCCTAATTAGTCCATGATTTGACAATGTGGTGCTACAGTAACCATTTGCTAATGATGGATTAATTAGGCTTAATAGATTCGTCACGCGAATTAGCACAGGGTTCTGCAATTAGTTTTATAATTAGCTCATGTTTAGTTCTCCTAATTAGCATCCGAACATCCGATGTGACACTGTTAAAGTTTAGCACCTCGTATCCAAACACCCCCT	346
ba3200	DEL	Chr4	12290552	12290900	AGGGGTGTTTTGGAGGAGGGGGGCTAAACTTATGCCCCCGTCACATCGGATGTTTGGACACTAATTAGGAGTATTAAACCTAGGTTAATTACAAAACTAATTACACAACCCCTAGGCTAAATCGCGAGACGAATCTATTAAGCCTAATTAGTGCATGATTTGACAATGTGGTGCTACAGTAACCATTCACTAATGATGGATTAATTAGGCTCAATAGATTCGTCTCGCGATTTAGCCTAGGGGTTCTGCAATTAGTTTTGTAATTAGCTTATGTTTAGTCCTCCTAATTAGTATCCGAACATCCGATGTGACAGGGCTAAAGTTTAGCCTCCTCCTTCCAAACACCCC	350
ba3201	DEL	Chr4	12291057	12291324	AGTTACTCCCAACTCCCAACTTTGACACTATGCAAAAAGAAGATTCCCCATCACATCAAACTTGCGGTACATGCATGGAGTACTAAATGTAGATGAAATTAAAAACTAATTGCACAGTTTTGTTGTATTTTGCGAGACGAATCTTTTGAGCCTAATTAGTCAATATTTGGACAATAATTCACAAATACAAACGAAACGCTACAGTGTGCTACAGTGCTGTAACAGTAATTTGGCACCTCCCAAATTCCCCAACTAAACAAGGCCTTA	272
ba3202	DEL	Chr4	12378125	12378648	AAGAAAGACAGCCATGTCTCAAAAGAAATTTCAAAGGGGGAGAGATCACACAAAAAGGAGTTTTCATTTCATCCACCATATCCATACACGTGCACATCTTGCTCTGATTGTATGACTTATTTTTCTCCTAGGATCCGATTTTTGACTTTGCAATATATGTGATACAAGTATGCCTTACCCTTGATACCCTACCTTGAGCTCCACATATTGCCATCACTAGAAGTAAGATGAAGAAAGGCAAGTCTAATACCTTGGTGAGGACATATATACATTGAGCGATCTGAGAGAATTAAATGATGAGCTAAGCAAGGTTTGTTTTGAAGACTTATTGAAAAATCTCAAGCTACTAGACATGAGGAGTAGAAGTGACTTAATTCAAGACAATTCCATGCCTCAACT…	123
ba3209	DEL	Chr4	12841298	12841664	TAAGGGGCTGTTTGGATACGAGGTGCTAAACTTTAACAGTGTCACATCGGATATTCGGATGCTAATTAAGAGGACTAAACATGAGCTAATTATAAAACTAATTGCAGAACCTTGTGCTAATTCGTGAGACGAATCTACTAAGCATAATTAATCCATCATTAGCAAATGGTTACTGTAGCACCACATTGTCAAATCATGGACTAATTAGACTTAATAGATTCGTCTCGCGAATTATACTCCATCTGTGCAATTAGTTTTGTAATTAGCTTATGTTTAGTATTCCTAATTAGCATCCAAACATTCGATGTGACAGGTGTTAAATTTTAATAGGGTGTTCCCAAACACCCCCTAACATGCATAATGGAC	346
ba3210	DEL	Chr4	12852421	12852755	TGGGAACACCCTATTAAAGTTTAACACCTGTCATATCGGATGTTTGGATGCTAATTAGGAGTATTAAACATAGGCTAATTACAAAACTAATTGCACAGATGGAGTATAATTCGCGAGACGAATCTATTAAGCCTAATTAGTACATGATTGACAATGTGGTGCTACAGTAACCATTTGCTAATGATGGATTAATTAGGCTTAATAGATTCGTCTCGCGAATTAGCACAGGGTTCTGCAATTAGTTTTAGAATTAGCTTATGTTTAGTGCTCCTAATTAGTATCCGAACATCCGATGTGACACTGTTAAAGTTTAGCACCTCGTATCCAAACACCC	347
ba3222	DEL	Chr4	15163054	15163408	GGGGCGTTTTCTTCCCGTGTCTTATTTTTAGCACGTGTCACATCGAATGTTTAGATACTAATTAGGAGTAGTAAACATAGACTATTTACAAAACCAATTACATAAGTGGAATCTAAACGGCGAGACGAATCTATTAAGCCTAATTAAGCCTAATTAATCCATCATTAGCAAATATTTACTGTAGCAACACATTGTCAAATCATGGACTAATTAGGCTTAATAGATTCATCTCGCCGTTTAGATTCGTCTTATGTAATGGGTTTTGTAAATAGTCTACGTTTAATACTCCTAATTAGTATCTAAACATTCGATGTGACGGGTGCTAAAGTTTAGCAAGTGGAAGAAAACAGGCCC	363
ba3224	DEL	Chr4	16048509	16048810	CAGATGCTAATTAGGAGGACTAAATATGAGCTAATTAAAAAACTAATAGCAGAACCCATAGGCTAAATCGCGAGACGAATCTATTAAGCCTAATTAATCCATCATTAGCGAATGGTTACTGTAGCACCACATTGTCAAATCATGGACTAATTAGGCTTAATAGATTCGTCTCGCGATTTAGCCTAGGGGTTGTGCAATTAGTTTTGTAATTAGACTATGTTTAATACTCCTAATTAGTGTCCAAACATCCGATGTGACAGGGGCTAAAATTTAGCCCCTCCCTGCCAAACAGGGGCATAGT	348
ba3268	DEL	Chr4	23206282	23206584	TACTAATTAGGAGTATTAAACGTAGACTATTTACAAAACCCATTACATAAGACGAATCTAAACGGCGAGACCAATCTATTAAGCCTAATTAGTCCATGATTTGACAATGTGTTGCTACAGTAAATATTTGCTAATGATGGATTAATTAGGCTTAATTAGGCTTAATAGATTCGTCTCGCCGTTTAGATTCCACTTATGTAATTGGTTTTGTAAATAGTCTACGTTTACTACTCCTAATTAGTATCTAAACATTCGATGTGACACGTGCTAAAAATAAGACACGGGAAGAAAACGCCCCCGTA	372
ba3270	DEL	Chr4	23568701	23569055	AACTTTAGCCCTGTCACATCGGATGTTCGGATACTAATTAAGAGGACTAAACATAAGCTAATTACAAAACTAATTGCAGAACCCCTAGGCTAAATCGCGAGACGAATCTATTGAGCCTAATTAATCCATCATTAGTGAATGGTTACTGTAGCACCACATTGTCAAATCATGCACTAATTAGGCTTAATAGATTCGTCTCGCGATTTAGCCTAGGGGTTGTGTAATTAGTTTTGTAATTAATCTAAGTTTAATACTCCTAATTAGTGTCCAAACATTCGATGTGACGGGGGCTAAAATTTAGCCCCCTCCTCCCAAACACCCCCTTATTCGGCCAGGAGTCCAAAAACGCATCGA	346
ba3271	DEL	Chr4	23600484	23600808	TGTTAAACTTTAATAGTGTCACATCGGATGTTCGGATGCTAATTAGAAAAAACTAAATATGAGCTAATTATAAAATTAATTGCAGAACCCTGTGCTAATTCGCGAGACGAATCTATTAAGCCTAATTAATCCATCATTAGCAAATGGTTACTGTAGCACCACATTATCAAATCATGGACTAATTAGGCTCAATAGATTCGTCTCGCGAATTACACTCCATATATGCAATTAGTTTTATAATTAGCCTATGTTTAATACTCTTAATTAGCATCCAAACATCCGATGTGACGGGTGTTAAACTTTAACACTTGGTTGCCAAACAGG	357
ba3284	DEL	Chr4	25508100	25508454	GGGGTGTTTGGATACGAGGTGTTAAACTTTAACAGTGTCACATCGGATGTTCGGATGATAATTAGGAGAACTAAACATGAGCTAATTATAAAACTAATTGCAGAACCCTGTGTTAATTCGCGAGACGAATCTATTAAGCCTAATTAATCCATCATTAGCAAATGGTTACTGTAGCACCACATTGTCAAAATCATGGACTAATTAGGCTTAATAGATTCGTCTCGTGAATTATACTCCATCTGTGCAATTAGTTTTGTAATTAGCCTATATTTAATACTCCTAATTAGCATCCAAACATCCGATGTGACGGGTGTTAAAGTTTAACAGCTGGTTGCCAAACAGGCCCTCCATGTC	345
ba3287	DEL	Chr4	25981699	25982053	GGCCTGTTTTCTTCCACTTGCTAAACTTTAGCACCCGTCACATCGAATGTTTAGATACTAATTAGGAGTATTAAACGTAGACTATTTACAAAACCCATTACATAAGACGAATCTAAACGGCGAGATGAATCTATTAAGCCTAATTAGTCCATGATTTGACAATGTGTTGCTACAGTAAATATTTGCTAATGATGGATTAATTAGGCTTAATTAGGCTTAATAGATTCGTCTCGCCGTTTAGATTCCACTTATGTAATTGGTTTTGTAAATAGTCTACGTTTACTACTCCTAATTAGTATCTAAACATTCGATGTGACACGTGCTAAAAATAAGACACGGGAAGAAAACGCCCCC	365
ba3309	DEL	Chr4	29365495	29365886	TAGGCCCTGTTTGGGAAGGGGTGTTAAAGTTTTTAACACCCCACTTTTAACACTTTTTAACACTTTCCTATCCAAACACTTGTGTTAAAAGTGGGGTGTTAAAGTTTAACACCCCATTTTTCATAAACACATGGAGGAGGTGTTAAAACTTGCTAAAGGTGTTAAAAGTGGTCCCCCTCTCCACTTTTTCCCAGGTTACCCCTTCTCTCTCCTCCCTCTCTCTCCGCCGGCCATAAATGAGGGGGCAATGGAGTCATTTCCCACCAAAGGTGTTAAAGTTTAACACATCATCCAAACACCCCAATGTGTTAAACTTTAGCACTCTATTTGAGAGTGTTAAAACTTTAACACTTGTTAAATTTTAACGCAGGGTATCCAAACAGGCCCTTAG	391
ba3310	DEL	Chr4	29416634	29416945	TCTTCTCCTGTGGACCCGTGTGAAACGATTTCCTTCAGGCCATGTTTAGTTACTCCCAACTCCCAACTTTGACACTATGCAAAAAGAAGATTCCCCATCACATCAAACTTGCGGTACATGCATGGAGTACTAAATGTAGATGAAATTAAAAACTAATTGCACAGTTTTGTTGTACTTTGCAAGACGAATCTTTTGAGCCTAATTAGTCAATATTTGGACAATAATTCACAAATACAAACGAAACGCTACAGTGTGCTACAGTGCTGTAACAGTAATTTGGCACCTCCCAAATTCCCCAACTAAACAAGGCC	274
ba3311	DEL	Chr4	30140711	30141237	TGGCTTTCATGTTTGTTTGAGCTTCTCACTTTTCACGCTGAGAAGTTGCTAGGAAGTTCAAACAAATAGGACCATAGATGTGTATGTTTTTAAACTAAATATTTAAAAGTAGCCAAAGTTTTAGAAGTTTGGCTAGATAAAAAGTACCTCTCCTTCCGTCCCAAATTACTATTCATTTTGACATTTTTAGATACATAGCTCTTGCTATGCACCTATATATATATATATATATATATATATATATATATATATATATATATATATATATATATATATATATATATATATATATATATATATATATATATATATATATATATATATATATATATATATACGGTAATGCTAAGCTCCCGATGTCCGACGCCAGCAAAATATCGGACGCGACGTGGCTCTTTA…	112
ba3314	DEL	Chr4	30344427	30344673	CCAACTTTGACACTATACAAAAAGAAGATTCCCCATCACATCAAACTTGCGGTACATGCATGGAGTACTAAATGTAGATGAAATTAAAAATTAATTGCACAGTTTTGTTGTACTTTGCGAGACGAATCTTTTGAGCCTAATTAGTCAATATTTGGACAATAATTCACAAATACAAACGAAACGCTACAGTGTGCTACAGTGCTGTAACAGTAATTTGGCACCTCCCAAATTCCCCAACTAAACACG	281
ba3315	DEL	Chr4	30344791	30345122	ATACGAGGTGTTAAACTTTAACAGTGTCACATCGGATGTTCGGATGCTAATTAGGAGAACTAAATATGAGCTAATTATAAAACTAATTGCAGAACCCTGTGCTAATCCGCGAGACGAATCTATTAAGCCTAATTAATCCATCATTAGCAATTGGTTACTGTAGCACCACATTGTCAAATCATGGACTAATTAGGCTTAATAGATTCGTCTCGTGAATTACACTTCATCTGTGCAATTAGTTTTGTAATTAGCCTATATTTAATACTCCTAATTAGCATCCAAACATCCGATGTGACAAGTGTTAAATTTTAACACTTGGTTGCCAAACAGG	354
ba3316	DEL	Chr4	30504775	30505038	AGTTACTCCCAACTCCCAACTTTGACACTATGCAAAAAGAAGATTCCCCATCACATCAAACTTGCGGTACATGCATGGAGTACTAAATGTAGATGAAATTAAAAACTAATTGCACAGTTTTGTTGTACTTTGCGAGACGAATCTTTTGAGCCTAATTAGTCAATATTTGGACAATAATTCACAAATACAAACGAAACGCTACAGTGTGCTACAGTGCTGTAACAGTAATTTGGCACCTCCCAAATTCCCCAACTAAACACGGC	271
ba3322	DEL	Chr4	30945170	30945572	GAATTGGAATCTATTTATGGAGTAGGCTAATTTATGTTGGAATGTGGCATTCCACAACTTTCCAAAGTTTAGATATAAGCCTATCTTAAATTCATGGGGTGGGAGATGGAAATTGATTCTATAGATTATGGTTATTAGATGGAATTCAATTCTTATAGCACGCTCTTAGACTCGCTTCTCTATAGTAGAAGTGCAGCATACAAGTATCTCTCCCATATCACCAACTATAATATACAACTATATTCCACATACAATTATATTAGCTTAATTAATTTATGTCTAAATTATGATTATTAGGATGGAATTCAATTCCATCGAAACAAACGGGGCCTTAAGGAAAAATGAAGATTCCATGGTTGCCGCGGCTACTGCCGATGCTACCGACCTCACAAGGTGACA…	355
ba3323	DEL	Chr4	30958416	30958701	CAGTCTGTTACTATGGCCTTGTTTAGTTGGCCAATTTGGGAGGTGCCAAATTACTGTTACAGCACTGTAGCACACTGTAGCGTTTCGTTTGTATTTGTAAATTATTGTCCAAATATTGACTAATTAGGCTCAAAAGATTCGTCTCGCAAAGTACAACAAAACTGTGCAATTACTTTTTAATTTCATCTAGATTTAGTACTCCATGCATGTACCGCAAGTTTGATGTGATGGGGAATCTTCTTTTTGCATAGTGTCAAAGTTGGAAGTTGGGAGTAACTAAACATG	274
ba3324	DEL	Chr4	31182409	31182831	GGTGCGCCCATGCATGCACGCCCATCCGTGCCGGGCCCTGGGGTCCTCGGCGGCGGTGCAACATTTGCGAGCCTGCGGGAGCAAGCAAATTAAGGGGCTGTTTGGATACGAGGTGCTAAACTTTAACAGTGTCACATCGGATGTTTGGATGCTAATTAGGAGGACTTAACATGAGGTAATTATAAACCTAATTGCAGAACCTTGTGCTAATTCGCGAGACGAATCTATTAAGCCTAATTAATCCATCATTAGCAAATGGTTACTGTAGCACCACATTGTCAAATCATGGACTAATTAGGCTTAATAGATTCGTCTCGCGAATTATACTCCATCTGTGCAATTAGTTTTGTAATTAGCTTATGTTTAGTACTCCTAATTAGCATCCAAACATCCGATGTG…	329
ba3325	DEL	Chr4	31242304	31242783	TAACTAAGGGGGTGTTTGGATAGCATGTGCTAAATTTTAGCACCTGTCACATCGGATGTTTGGACACTAATTAGGAGTATTAAACATAGTCTAATTACAAAACTAATTGCACAACCCCTAGGCTAAATCGCGAGACGAATCTATTAAGCCTAATTAATCCATCATTAGCGAATGGTTACTGTAGCACCACATTGTCAAATCATGGACTAATTAGGCTTAATAGATTCGTCTCGCGATTTAGCCTAGGGGTTGTGCAATTAGTTTTGTAATTAGGCTATGTTTAATACTCCTAATTAGTATCTAAACATCCGATGTGACATGTGCTAAAATTTAGCACATGCCTCCCAAACACCCCCTAAATTAAATAGAAAATGTCAAGGGTATTTGAAAATTGCTTCG…	360
ba3329	DEL	Chr4	31679632	31679893	TTACTCCCAACTCCCAACTTTGACACTATGCAAAAAGAAGATTCCCCATCACATCAAACTTGCGGTACATGCATGGAGTACTAAATGTAGATGAAATTAAAAACTAATTGCACAGTTTTGTTGTACTTTGCGAGACGAATCTTTTGAGCCTAATTAGTCAATATTTGGACAATAATTCACAAATACAAACGAAACGCTACAGTGTGCTACAGTGCTGTAACAGTAATTTGGCACCTCCCAAATTCCCCAACTAAACAAGGC	276
pD6845	DEL	Chr4	31989219	31989574	TTCAGGGGCTGTTTGGATACAAGGTGTTAAACTTTAACAGTGTCACATCGGATGTTCGGATACTAATTAGGAGGACTAAACATGAGCTAATTATAAAACTAACTGCAGAACCCCTATACTAATTCGCGAGACGAATCTATTAAGCCTAATTAATCCATCATTAGCAAATGGTTACTGTAGCACCACATTGTCAAATCATGGACTAATTAGGCTTAATAGATTCGTCTCGCGAATTATACTCCATCTGTACAATTAGTTTTGTAATTAGCTTATATTTAGTACTCCTAATTAGCATCCAAACATCCGATGTGACAGGTGTTAAAGTTTAATAGGGTGTTCCCAAACACCCCCTCAG	350
ba3339	DEL	Chr4	32563875	32564133	AATTTTAGCCCCCGTCACATCGAATGTTTGGACACTAATTATGAATATTAAACCTAGACTAATTACAAAACTAATTACACAACCCCTAGGCTAAATCGCGAGACGAATCTATTAAGCTAATTTAGTCCATAATTTGACAATGTGGTGCTACAGTAACCATTCGCTAATGAGGGATTAATTAGGCTCAATAAATTCGTCTCGTGATTTAGCCTAGGGGTTCTGCTATTAGTTTTGTAATTAGCTCATATTTAGTCCTCC	367
ba3344	DEL	Chr4	32877300	32877584	AGCTGAAGACGAGCTACAAGATTACTGCTCCCTCCGTTCCAAATTGTAAGTCATTCCAAGAATCTTGAAGAGTCAAAGTATCTCAAGTTTGACCAAATTTACATGATAATATAATAACATTTATGATGTCAACTAAGTATCATTAGATTCTTTATCAATTATATTTTCATAGTATATCTATTTGATGTCATAAATCTTTATATTTTTCTCTATAATTTTGGTCAAACTTGAGATACTTTGACTCTCCAAGATTCTTAGAATGACTTGCAATTTGGGACAGAGGG	247
ba3347	DEL	Chr4	33173659	33174029	GTTTGGGAACACCCTGTTAAAGTTTAACACCTATCACATCGGATGTTTGGATGCTAATTAGGAGTATTAAACATAGGTTAATTACAAAACTAATTGCACAGATGGAGTATAATTCGCGAGACGAATCTATTAAGCCTAATTAGTCCATGATTTGACAATGTGGTGCTACAGTAACCATTTGCTAATGATGGATTAATTAGGCTTAATAGATTCGTCTCGCAAATTAGCACAGGGTTCTGCAATTAGTTTTATAATTAGCTCATGTTTAGTGCACCTAATTAGTATCCGAACATCCGATGTGACACTGTTAAAGTTTAACACCTCGTATCCAAACACCCCCCTAGTCGCTGAAAGGTTGTTTTGAATAATG	346
ba3349	DEL	Chr4	33354906	33355307	TCTCATAACGACATAGGGCCTGTTTGGATACCCTGTGTTAAAATTTAACAAGTGTTAAAGTTTTAACACTCTCAAATAGAGTGCTAAAGTTTAACACATTGGGGTGTTTGGATGATGTGTTAAACTTTAACACCTTTGGTGGGAAATGACTCCATTGCCCCCTCATTTATGGCCGGCGGAGAGAGAGGGAGGAGAGAGAAGGGGTAACCTGGGAAAAAGTGGAGAGGGGGACCACTTTTAACACCTTTAACAAGTTTTAACACCCCCTCCATGTGTTTATGAAAAATAGGGTGTTAAACTTTAACACTCCACTTTTAACACAAGTGTTTGGATAGGAAAGTGTTAAAAAGTGTTAAAAGTGGGGTGTTAAACTTTAACACCCCCTTCCCAAACAGGGCC…	383
ba3352	DEL	Chr4	33605463	33605804	TTGGCAGGGAGGGGCTAAATTTTAGCCCCTGTCACATCGGATGTTTGGACACTAATTAGGAGTATTAAACATAGTCTAATTACAAAACTAATTGCACAACCCCTAGGCTAAATCGCGAGACGAATCTATTAAGCCTAATTAGTCCATGATTTTGACAATGTGGTGCTACAGTAACCATTCGCTAATGATGGATTAATTAGGCTTAATAGATTCGTCTCGCGATTTAGCCTATGGGTTCTGCTATTGGTTTTTTAATTAGCTCATATTTAGTCCTCCTAATTAGCATCTGAACGTGTGATGTGACAGGGCTAAAGTTTAGCCCCTGACATCCAAACGCCCCC	354
ba3355	DEL	Chr4	33851305	33851418	TGTTCGCTTCAACTTATAAGCCAGCTGAAAAGCTGAAACGGCTGATTTGTTGTGAGAGGAAAATACTGTTTGGTGGCTGATAAGCCGGCTGAATAAGCTGAAGCGAACAGGCT	118
ba3360	DEL	Chr4	33972532	33972671	GAGACCTGGCGCCGCCTCGGAAGCCCACGAAGATCTAGACGCAAATGGCGGCCACGCTTGAGGACCTTGTGAGGAAGTTTGAGGGCTTCGAGTTGATGATGCAGCAGTCCTTGGATAAGATCAGTGGCCTGGAGGCTTG	173
ba3367	DEL	Chr4	34217264	34217602	CATGTTTAGTTACTCCCAACTTCCAACTTTGACACTATGCAAAAAGAAGATTCCCCATCACATCAAACTTGCGGTACATGCATGGAGTACTAAATGTAGATGAAATTAAAAACTAATTGCACAGTTTTGTTGTACTTTGCGAGACGAATCTTTTAAGCCTAATTAGTCAATATTTGGACAATAATTCACAAATACAAACGAAACGCTACAGTGTGCTACAGTGCTGTAACAGTAATTTGGCACCTCCCAAATTCCCCAACTAAACACGGCCATAGTTCGTTGGAGATCCATTTAGGGCACCAATTCTCGACCGCACCCTTGGCTAGCTAGGTCAGCTT	277
ba3369	DEL	Chr4	34275575	34275755	TGGATATTCGAGCCCCAGCTATTACTGACAAAGAGATATAAGCCCCAAACTGAAAAAGCTGAAACGACTGATTTGTTATGAGAGAAAAATACTGTTCGGTGGCTGATAAGTCGGCTGATAAGCTGAATCGAACAGAATTATAGTATTAGGAGATGGCATAAAAAGAAGACATTGAAATAA	100
ba3370	DEL	Chr4	34275951	34276374	ATGCACATGGTCACTGCAGAACAGAGTTCAGAGCAAGGAATAGACATAGGGGGTGTTTGGCCAGGAGGGGTTAAATTTTAGCCCCTGTCACATCGGATGTTTGGACACTAATTAGGAGTATTAAACATAGTCTAATTACAAAACTAATTGCACAACCCCTAGGCTAAATCGCGAGACGAATCTATTAAGCCTAATTAGTCCATGATTAGATAATGTGTTGCTACAGTAAACATTCGGGTATGATGGATTAATTAGGATTAATAGATTCGTCATACGAATTACCCTAGGGGTCCTGCTATTAGTTTATAATTAGCTCATATTTAATCCTCCTAATTAGCATTCGAACGTGTGATGTGACAGGGCTAAAGTTTAGCCCGTGGCATCCAAACGCCCCCATAG…	348
ba3385	DEL	Chr4	35144402	35144933	TAGACTGAAGTGATTTATATGATATGAAGTAGATGCTGCAATAATCATTCTCTATCGAAAGAAGAGGTCCATTTCCAACCAAAGAGTGCCTAGCAATCTTTCAAGAAAAATATTTAAAAGAGCAACTAGCAGATTAGAAGGCAGGAGCCACCATACACATCAGCAACACTTAAGAGATGACTCTAGAGTACTTTGACCTGACAACTTAAAGCCAATTCTTGCTGGCTATATTATCTTCACATTATATTGGTTTGGTAGGTATAAATGATATAAATTTTTGGGAAAACAATGGTGAAGTTTAACTTTGAGGGTGTGGAGCCAAAATGAATATTTTTTAGTAGAGGGAGTATACACTACAAAAGTTTTTTTTCATGATATATCTAGTAACTTTAACTGTAT…	364
ba3394	DEL	Chr4	35290406	35290622	TACTATTTGCAGCACTGTCAAGCAAGCCTAAGTTTTCATGATAAGATATTGATAACACACCAATTCCACCTTACTTATCAAGGAAAACGCAAACACAAGAAACATTCTACACTCACTGTATATAGCATGATTCCAAACCAACTCTAAAAGTAACATCTCTCAAGACTACTATTTGCAGCACTGTCAAGCAAGCCTAAGTTTTCATGATAAGATATT	171
ba3400	DEL	Chr4	35365737	35366143	GACCTCGCGTCACTTTGAACCGTCCTTACACAGTGCGTCAATGACACATAGGGCCTGTTTTCTTCCACTTGCTAAACTTTAGCACCCGTCACATCGAACGTTTAGATACTAATTAGAAGTATTAAACGTAGACTATTTACAAAACCCATTACATAAGACGAATCTAAACGGCGAGACGAATCTATTAAGCCTAATTAGTCCATGATTTGACAATGTGTTGCTACAGTAAATATTTGCTAATGATGGATTAATTAGGCTTAATTAGACTTAATAGATTCGTCTCGCCGTTTAGATTCCACTTATGTAATTGGTTTTGTAAATAGTCTACGTTTACTACTCCTAATTAGTATCTAAACATTCGATGTGACACGTGCTAAAAATAAGACACGGGAAGAAAAC…	346
ba3402	DEL	Chr4	35449877	35450062	CAAATTGGCCTATCTGAAAATTGAGGGATGAATTTGACCCTCAGGCTCGGGTTAAAGTTAAGGAACAAAATGCATATTTTGCCAAATGAAAATATTTTTATTTTTAATTCAAACATAATTTTGTATTCGAATTCTTATATGATGTTTCTATTTGAATTCAAATAGAAATGGTAGCTGATCATTCT	136
ba3403	DEL	Chr4	35465089	35465457	GTTTGGATCATTGGAATTGAATTCCATCCTAATAATCATAATTTAGACACAAATTAATTAAGCTAATATAATTGTATGTGGAATATAGTTGTATATTATAGTTGGTGATATGGGAGAGATACTTATATGCTGCACTTCTACTATAGAGAAGCGAGTCCAAGAGCGTGCTATAAGAATTGAATTCCATTCTAATAACCATAATCTATAGAATCAATTTCCATCTCCCACCCCATGAATTTAAGATAGGCTTATATCTAAACTTTGGAAAGTTGTGGAATGCCACATTCCAACATAAATTAGCCTACTCCATTAAATAGATTCCAATTCCTTCAAAATGAAGGAACCCAAACAGGACCTTATAGTATTTG	361
ba3423	DEL	Chr4	36000803	36001012	GATCATGTGATGCAATTCTGGTATACATGCTGGTTTGTCGGGGGCCGACGACTCATCTGCGGATATAGCGGGGCTGTTCGCTCCGGTTAAAAAGCTGAAACGGCTGATTTATTGTGAGATGAAAATACTGTTTGGTGGCTGATAAGCCGGCTGAATAAGCTGAAGTGAACAGGTCGAGTGTCTGTTCAGCTGGATTTATAAACCAACTG	112
ba3434	DEL	Chr4	36159931	36160192	TGAAGATGCAAAATCACTGTTGTAGCACTGTAGCACACTGTAGCGTTTCGTTTGTATTTGTGAATTATTGTCTAAATATTGACTAATTAGACTCAAAAGATTCGTCTCGCAAAGTACAACAAAACTGTGCAATTAATTTTTGATTTTATCTACATTTAGTACTATATGCATGTACCGCAAGTTTGATGTGATAGAGAATCTTTGAGGTAACTAAACATGCCCATCTAAAAATTGCAGGGCTTGGAAGATATTTTGCTGTTA	241
ba3442	DEL	Chr4	36909309	36909664	CCTTGTTTACTTCACCCCCAACTCCCAACTTTGACTTCACCCCCAACTCCCAACTTTGGCACTATGCAGAAAGAAGATTCCCATCACATCAAACTTGCGGTACATGGAATACTAAATGTAGATGAAATTAAAAACTAATTGCACAGTTTTGTTGTACTTTGCGAGACGAATCTTTTGAGCCTAATTAGTCAATGTTTGGACAATAATTCACAAATACAAACGAAACGCTACAGTGTACTACAGTGCCAACACAGTAATTTTACACCTCCCAATTTGACCAACTAAACCTCCCAATTTGACCAACTAAACGAGGCCTGAAAATTAGCTGCCCACTTCCGTTGATGGCATCACTGCC	315
ba3444	DEL	Chr4	36934701	36935032	ATACGAGGTGCTAAACTTTAACAGTGTCACATCGGATGTTCGGATGCTAATTAGGAGGACTAAACATGAGCTAATTATAAAACTAATTGCAGAACCCTGTCCTAATTCGCGAGACGAATCTATTAAGCCTAATTAATTCATCATTAGCAAATGGTTACTGTAGCACCACACTGTCAAATCATGGACTAATTAGGCTTAATAGATTCGTCTCGCGAATTATACTCCATCTGTGCAATTAGTTTTGTAATTAGCCTATGTTTAATACTCCTAATTAGCATCTAAACATCCGATGTGACAGGTGTTAAACTTTAACAGGGTGTTGCCAAACACC	341
ba3445	DEL	Chr4	36965773	36966115	TTGTTTAGTTGGGGAATTTGGGAGGTGCCAAATTACTGTTACAGCACTGTAGCACACTGTAGCGTTTCGTTTGTATTTGTGAATTATTGTCCAAATATTGACTAATTAGGCTCAAAAGATTCGTCTCGCAAAGTACAACAAAACTGTGCAATTAGTTTTTAATTTCATCTACATTTAGTACTCCATGCATGTACCGCAAGTTTGATGTGATGGGGAATCTTCTTTTTGCATAGTGTCAAAGTTGGGAGTTGGGAGTAACTAAACATGGCCTTATTATTAGCCAAAGGACGGTTTTGACATAGTAAAGCATGGACTAGGACTGACAGATCTGACCTTTTTCTA	260
ba3447	DEL	Chr4	37054384	37054756	GGGGAATTTGGGAGGTGCCAAATTACTGTTACAGCACTGTAGCACACTGTAGCGTTTCGTTTGTATTTGTGAATTATTGTCCAAATATTGACTAATTAGGCTCAAAAGATTCGTCTCGCAAAGTACAACAAAACTGTGCAATTAGTTTTTAATTTCATCTACATTTAGTACTCCATGCATGTACCGCAAGTTTGATGTGATGGGGAATCTTCTTTTTGCATAGTGTCAAAGTTGGGAGTTGGGAGTAACTAAACATGGCCATAGACGGTGTAAGGGAGGCGCATGGGATGAGGGCAGGCAGCAGGCCGGCTTCTGCCGCGGCTCCGCCTCTTCCCCGTCTTCTCGTACCTACTTTTCTGGATAATTCTACTG	277
ba3449	DEL	Chr4	37116486	37116827	AGGGAGGGGCTAAATTTTAGCCCCTGTCACATCGGATGTTTGGACACTAATTAGGAGTATTAAACATAGTCTAATTACAAAACTAATTGCACAACCCCTAGGCTAAATCGCGAGACGAATCTATTAAGCCTAATTAGTCCATGATTTGACAATGTGGTGCTACAGTAACCATTCGCTAATGATGGATTAATTAGGCTTAATAGATTCGTCTCGCGATTTAGCCTATGGGTTCTGCTATTGGTTTTTTAATTAGCTCATATTTAGTCCTCCTAATTAGCATCTGAACGTGTGATGTGACAGGGCTAAAGTTTAGCCCCTGACATCCAAACGCCCCCTGAGCA	355
ba3451	DEL	Chr4	37187591	37187953	ATCACTTGCTGAGTAATCATCTACGGCTATGTTTAGTTCACTCCAAAATCCCAACTTTGACACTATGTAAAAAGAAGATTCCCCATCACATCAAACTTGCGGTACATGCATGGAGTACTGAATGTAGATGAAATCAAAAACTAATTGCACAGTTTTGTTGTACTTTGCGAGACGAATCTTTTGAGCCTAATTAGCCAATATTTGGACAATAATTCACAAATACAAACGAAACGCTACAGTGTTGCTATAGTAATTTTGGCTCCTCAAAGTTGGGCATCAGAAAATATTCTTACCTGACGTGATGGTTTGAACTATTCGTGATTGTGCCTGGCACTCCCTTAGCAGCCTGCTGGACAACGACA	252
ba3455	DEL	Chr4	37242964	37243250	TTGACAGATTCTTAGGCCTTAGTTCCCAATTTGGGATAGGTAAAATTGGCATTTTGCCATAAATGCGCAACTGTAGCGTTTCGTTTGTATTTGTGAATTATTGTCCAAATATTGACTAATTAGGCTCAAAAGATTCGTCTCGCAAAGTACAACAAAACTGTGCAATTAGTTTTTGATTTCGTCTACATTTAGTACTCCATACATGTACCGCAAGTTTGATGTGATGGGGAATTTTCTTTTTGTATAGTATTAAAGTTGGGAGTTTGGAGGGAACTAAACATAACCT	259
ba3456	DEL	Chr4	37246115	37246380	TTACTCCCAACTTCCAACTTTGACACTATGCAAAAAGAAGATTCCCCATCACATCAAACTTGCGGTACATGTATGGAGTACTAAATGTAGATGAAATTAAAAAGTAATTGTACAGTTTTGTTGTACTTTACGAGACGAATCTTTTGAGCCTAATTAGTTAATATTTGGACAATAATTCACAAATACAAACGAAACGCTACAGTGTGCTACAGTGCTGTAACAGTAATTTGGCACCTCCCAAATTGGCCAACTAAACAAGGCCTGA	284
ba3461	DEL	Chr4	37273271	37273588	CAGGAACAGCGGATAGATACGAGCTACCGTGTCTAAACCCTTGTTTACTTCACCCCCAACTCCTAACTTTAACACTATGCAAAAAGAAGATTCCCCATCACATCAAACTTGTGGTACATGCATGGAGTACTAAATGTAGATGAAATTAAAAACTAATTGTACAGTTTTGTTGTACTTTGCGAGATGAATCTTTTGAGCCTAATTAGTCAATATTTGGACAATATTTCACAAATACAAACGAAACGCTACAGTGTGCTACAGTACCAGCACAGTAATTTGTCACCTCCCAATTTAACCAACTAAACAAGGCCTAAGCT	286
ba3462	DEL	Chr4	37291887	37292228	AACTTTAACAGTGTCACATCGGATGTTCGGATGCTAATTAGAAGAACTAAATATGAGCTAATTATAAAACTAATTGCAGAACCCTGTGCTAATTCGCGAGACGAATCTATTAAGCCTAATTAATCCATCATTAGCAAATGGTTACTGTAGCACCACATTGTCAAATCATGGACTAATTAGGCTTAATAGATTCGTCTCGCGAATTACACTCCATCTATGCAATTAGTTTTGTAATTAGCCTATATTTAATACTCTTAATTAGCATCCAAACATCCGATGTGACGGGTGTTAAACTTTAACACTTGGTTGCCAAACAGGCCCGAGTTTGTGCCGTTTGGGCT	316
ba3468	DEL	Chr4	37558532	37558841	TGGTTTCCGGAGAGAGAGAAAAAAAGTTTAAGGCCCTGTTTAGTTACTCCCAACTCCCAACTTTGACACTATGCAAAAAGAAGATTCCCCATCACATCAAACTTGCGGTACATGCATGGAGTACTAAATGTAGATGAAATTAAAAACTAATTGCACAGTTTTGTTGTACTTTGCGAGACGAATCTTTTGAGCCTAATTAGTCAATATTTGGACAATAATTCACAAATACAAACGAAACGCTACAGTGTGCTACAGTGCTGTAACAGTAATTTGACACCTCCCAAATTCCCCAACTAAACAAGGCCTAAG	279
ba3474	DEL	Chr4	37692780	37693006	CCATGTTTAGTTACTCCCAACTTCCAACTTTGACACTATGCAAAAAGAAGATTCCCCATCACATCAAACTTGCGGTACATGTATGGAGTACTAAATGTAGATGAAATTAAAAAGTAATTGTACAGTTTTGTTGTACTTTACGAGACGAATCTTTTGAGCCTAATTAGTTAATATTTGGACAATAATTCACAAATACAAACGAAACGCTACAGTGTGCTACAGTGCT	289
ba3484	DEL	Chr4	37962124	37962347	GCTTTGCTCGAATATAGATCCTGTTTGTATACGCTTTTCCTAGCCACGTTTGGATTATAATCTAAGTAAAGATTTTCTCGTTTCTCGCTTTTCGTTTCTCGTAGTTCAAATCGTTGAAGCGGCTTACCACATAAGTGAGAATCGGTGGAAATAAGCAAAGCGTTTGGCGGGATTCTTATTTATTTCCACCGATAAGCCACTTATAAGCGGATACAAACGGGGC	250
ba3486	DEL	Chr4	37976665	37976865	GAGATGCTTATGACTTGAATTGATCCCAAGCTTGATTCCACTGAGTTCCAAACACTTTCAGCTTATGATTTCATGTTTGATTCAAATTTGGCTCAAATTCGCACTTGGCTCATAATACTTTTCTTTTAACCCAAATTTCATCATCAACCTCTTAATAACCTTCTTAGACTTTTAATAACACTGGGTGTTACACATCCTCT	108
ba3487	DEL	Chr4	37977542	37977900	AGCCACATCCCACATCAATCTTAGGTCTTGTTTAGTTGGTCAAATTGGGAGATGCAAAATTACTGTGCTAGCACTGTAGCACACTGTAGCATTTCGTTTGTATTTGTGAATTATTGTCCAAATATTAACTAATTAGGCTCAAAAGATTCGTCTCGCAAAGTACAACAAAACTGTGCAATTAGTTTTTAATTTCGTTTACGTTTAGTACTCCATGCATGTACCGCAAGTTTGATGTGATAGGAAATCTTCTTTTTGCATAGTGTTAAAGCTGGGAGTTGGGGGTAATTGGGAGTTGGGGGTAACTTGCCTTATTGTATCTTTTCGTATGACGATGACTCAGAAGCACAGCCGGGGAGGA	386
ba3488	DEL	Chr4	37978843	37979136	CCATGTTTAGTTACTCCCAACTTCCAACTTTGACACTATGCAAAAAGAAGATTCCCCATCACATCAAACTTGCGGTACATGCATGGAGTACTAAATGTAGATGAAATTAAAAACTAATTGCACAGTTTTGTTGTACTTTGCGAGACGAATCTTTTAAGCCTAATTAGTCAATATTTGGACAATAATTCACAAATACAAACGAAACGCTACAGTGTGCTACAGTGCTGTAACAGTAATTTGGCACCTCCCAAATTCCCCAACTAAACACGGCCTTAGGTAAAAATCAATGATTA	277
ba3490	DEL	Chr4	38030166	38030455	ACCGGGTTATTCTATTCCACTTCTAGAAGTTTCCCCTCCAAAAATAACCTCTCCCATTGGGGAACGCATTAGATATTTACCTAAACCCGTCGGTCCTTGGGCTTGAAGACTTCTTCTCGATCAAAACTCGTAGAGAAATCAGAACAGTTGAAGGAAGGGAACAGCATGGGCCATGAAAGGACCGGAGAAGGAATGCAGTAGGATGATTCTATCTTTCCTATGTATGGGGTGGGAAATCATCCGAAACGAATGCCTTCGTTCGATGATCCATGAGGGATGGAAATTTCGT	302
ba3492	DEL	Chr4	38117138	38117525	AGACATTCAACCAAGCCAAAAAGATTCCCATATTATTAAGGGGGTGTTTGGGAGGAGGGGGCTAAATTTTAGCCCCGTCACATCGAATATTTGGACACTAATTAGGAGTATTAAACCTAGACTAATTACAAAACTAATTACACAACCCCTAGGCTAAATCGCGAGACGAATCTATTAAGCCTAATTAGTCCATGATTTGACAATGTGGTGCTACAGTAACCATTCACTAATGATGGATTAATTAGACTTAATAGATTCGTCTCGCGATTTAGCCTAGGGGTTCTGCAATTAGTTTTGTAATTAGCTTATGTTTAGTCTTCCTAATGAGTATCCGAACATCCGATATGACAGGGCTAAAGTTTAGCCCCCTCCTTCCAAACACCCCTA	365
ba3494	DEL	Chr4	38167143	38167474	TAAACTTTAACAGTGTCACATCGGATGTTCGGATGCTAATTAGGAGAACTAAACATGAGCAATTATAAAACTAATTGCAGAACCCTGTGCTAATTCGCGAGACGAATCTATTAAGCCTAATTAATCCATCATTAGCAATTGGTTACTGTAGCACCACATTGTCAAATCATGGACTAATTAGGCTTAATAGATTCGTCTCGTGAATTACACTCCATTTGTGCAATTAGTTTTGTAATTAGCCTATATTTAATACTCCTAATTAGCATCCAAACATCCGATGTGACAGGTGTTAAACTTTAACACATGGTTGCCAAACAGGCCCTAATTGTTC	345
ba3495	DEL	Chr4	38177779	38178101	TTAAAGTTTAACACCCGTCACATCGGATGTTTGGATGCTAATTAGGAGTATTAAATATAGGCTAATTATAAAACTAATTGCACAGATGGAGTATAATTCGCGAGACGAATCTATTAAGCCTAATTAGTCCATGATTTGACAATGTGGTGCTACAGTAACCATTTGCTAATGATGGATTAATTAGGCTTAATAGATTTATCTCGCGAATTAACACAGGGTTCTGCAATTAGTTTTATAATTAGCTCATGTTTAGTTCTCCTAATTAGCATCCGAACATCCGATGTGACACTGTTAAAATTTAACACCTCGTATCCAAACACCC	352
ba3502	DEL	Chr4	38309451	38309731	TCTGGGCCGTGTTTAGTTTGGCGAATTTGGGGTGCTAAATTACTGTTACAGCACTGTAGCACACTGTAGCGTTTCGTTTGTATTGTGAATTATTGTCCAAATATTGACTAATTAGGCTCAAAAGATTCGTCTCGCAAAGTACAACAAAACTGTGCAATTAGTTTTTAATTTCATCTACATTTAGTACTCCATGCATGTACCGCAAGTTTGATGTGATGGGGAATCTTCTTTTTGCATAGTGTCAAAGTTGGGAGTTGGGAGTAACTAAACATGGCCCTGA	284
ba3504	DEL	Chr4	38721931	38722275	TGTTTGGATACGAGGTGTTAAACTTTAACAGTGTCACATCGGATGTTCGGATGCTAATTAGAAGAACTAAATATGAGCTAATTATAAAACTAATTGCAGAACCCTGTGCTAATTTGCGAGACGAATCTATTAAGCCTAATTAATCCATCATTAGCAATTGGTTACTGTAGCACCACATTGTCAAATCATGGACTAATTAGGTTTAATAGATTCGTCTCGTGAATTACACTCCATCTGTGCAATTAGTTTTGTAATTAACCTATGTTTAATACTCCTAATTAGCATCCAAACATCCGATGTGACACGTGTTAAACTTTAACACATGGTTGCCAAACAGGCCCTAA	354
ba3513	DEL	Chr4	39239194	39239609	TACATTTAGGCCCCATTTGGATCATTGGAATTGAATTCCATCCTAATAATCATAATTTAGACACAAATTAATTAAGCTAATATAATTGTATGTGGAATATAGTTGTATATTATAGTTGGTGATATGGGAGAGATACTTATATGCTGCACTTCTACTATAGAGAAGCGAGTCTAAGAGCGTGCTATAAGAATTGAATTCCATTCTAATAACCATAATCTAGAGAATCAATTTCCATCTCCCACCCCATGAATTTAAGATAGGCTTATATCTAAACTTTGGAAAGTTGTGGAATGCCACATTCCAACATAAATTAGCCTACTCCATTAAATAGATTCCAATTCCTTCAAAATGAAGGGACCCAAACAGGGCCTTATAGATTTTGTTATGTACTTAGATATA…	345
ba3518	DEL	Chr4	39468455	39468577	ATGATTAACGGCGACAAAGGCTGCCTGCCATTTTGCGTACACCGTGAATCCGTGATGGTTTCAACCTTGAAATATGTCTGGCCTTGCTGGCTCCAAATCTTTTGGAAGATTTGACTTGGAAT	154
ba3531	DEL	Chr4	39593659	39593994	CAGAGGGTCTGTTTAGTTGCCCGATTTTGGACAACCAAAATGACTGCGCCAGCACTGTAGCATACTATAGCGTTTCGTTTGTATTTGCGAATTATTGTCCAAATATTGACTAATTAGGCTCAAAAGATTCGTTTCGCAAAGTACAACCAAACTGTGCAATTAGTTTTTGATTTCGTCTACATTCAGTACTTCATGCATGTACCGTAAATTTGATGTGATGGGGAATCTTCTTTTTGCATAGTGTCAAAGTTGGGATTTTAGGGTAACGCCAGAGAAAGGATATAGAGTCTATTACAACCAGCATCCATGACCATAAACCTTTGGGACACTTGAAA	169
ba3535	DEL	Chr4	39645336	39645681	CTAAACTTTAGCCCTATCACGTCGGATGTTCGGATGCTAATTAGGAGGATTAAACATGAGCTAATTACAAAACTAATAGCAGAACCCCTAGGCTAAATCACGAGACGAATCTATTAAGCCTAATTAATCCATCATTAGCGAATGGTTACTGTAACACCACATTGTCAAATCATGGACTAATTAGGTTTAATAGATTCGTCTCACGATTTAGCCTAGGAGTTGTGCAATTAGTTTTGTAATTAAACTACGTTTAATACTTCTAATTAGTGTCCAAACATACGATGTGACAGGGGCTAAAATTTAGCCCCTATCTTCCAAACACCCCCTCCAGTGGCTAAAAGTTAT	370
ba3537	DEL	Chr4	39658470	39658799	CACCCATTAAAGTTTAGCACCTGTCACATCGGATGTTTGGATGTTAATTAGGAGTATTAAACATATGCTAATTACAAAACTAATTGCACAGATGGAGTCTAATTCGCGAGACGAATCTATTAAGCCTAATTAGTTCATGATTTGACAATGTGGTGCTACAGTAACCATTTGCTAATGACGGATTAATTAGACTTAATAGATTCATCTCGCGAATTAGCACAGGGTTCTGCAATTAGTTTTATAATTAGCTCATGTTTAGTCCTCCTAATTAGCATTTGAACATCCGATGTGACACTGCTAAAGTTTAGCACCGAGTATCCAAACACCCC	338
ba3538	DEL	Chr4	39669484	39669900	TAAAAGGGCTGGGCTACTCCGACCCACTCCGGTGTATTGGCACGCGGGGGTTAAAATTTAGTCCCTATCACATCGGATGTTTGATACTAATTAGGAGTATTAAACATGGGTTAATTACAAAACTAATTGCACAATCCCTAGATTAAATCGCGAGACGAATCTATTAAGCCTAATTAGTCCATGATTTGACAATGTGGTGCTACAGTAACCATTCGCTAATGATGGATTAATTAAGCTTAATAGATTCGTCTCGCGATTTAGCCTAGGAGTTCTGCTATTAGTTTTGTAATTAGCTCATATTTAGTCATCCTAATTAGCATCCCAACATCTGATGTGATAGGACTAAAGTTTAGCCCCTGTCTCCCAAACACCCCCGCTTGATACTCTCCCGCTTGGTCC…	399
ba3541	DEL	Chr4	39879952	39880277	GTGTTAAAGTTTAACACCCGTCACATCGAATGTTTGGATGCTAATTAGGAGTATTAAACATAGACTAATTACAAAACTAATTGCACAGATGGAGTGTAATTCGTGAGACGAATCTATTAAGCCTAATTAGTCCATGATTTGACAATGTGGTGCTACAGTAACCATTTGCTAATGATGGATTAATTAGGCTTAATAGATTCGTCACGCGAATTAGCACAGGGTTCTGCAATTAGTTTTATAATTAGCTCATGTTTAGTTCTCCTAATTAGCATCCGAACATCCGATGTGACACTGTTAAAGTTTAGCACCTCGTATCCAAACACCC	347
ba3543	DEL	Chr4	40053321	40053607	CTTCATCCTCAACTTCCAACTTTGGCACTATGTAAAAAGAAGATTCCTTATCACATCAAACTTGCGGTGCATGCATAGAGTACTAAATGTAGACGAAATTAAAAACTAATTGCACAATTTTGTTGTACTTTGCGAGACGAATCTTTTGAGCCTAATTAGTTAATGTTTGGACAATAATTCACAAATACAAACAAAACGGTACAGTGTGTTACAGTGCTGTAACAGTAATTTGACACCTCCCAACTTTGGCAACTAAACAAGCCCTGAATAAAGTTTACACCAATTT	288
ba3548	DEL	Chr4	40140847	40141112	ATTTCAAGTCATGCTGTGACCTGAATTGTACACAATGTAAGTTGCGATTTGTATTTGGATTTAGAATGTGAAGTCCATTGGGACTCATACATCCGAATCTATCAAATTCATCCGAATCTATCAAATTCATTTGATCTGCCAATGATTGAATTTAGTAACATAATTTTCACACATACCATTGGGTATGTTATGCTAGGTCTCGAATCTATCAAATTCATTTGATCTGCCAATGATTGAATTTAGTAACATAATTTTCACACATACC	120
ba3549	DEL	Chr4	40163512	40163877	GGTGTTTGCATACGAGGTATTAAATTTTAACAGTATCACGTCGGATGTTCGGATGCTAATTAGAAGAAATAAACATGAGCTAATTATACAACCAATTGCAGAACCCTATGCTAATTCGCGAGACGAATCTATTAAGCCTAATTAATCCATCATTGGCAAATGGTTGCTGTAGCACCACATTGTGAAATCATAGACTAATTAGGCTTAATAGATTCGTCTCGTGAATTACACTCCATTTGTGCAATTAGTTTTGTAATTAGCCTATGTTTAATACTCCTAATTAGCATCCAAACATCCGATGTAACGGGTGTTAAACTTTTAACACCTTACTGCCAAACAAGCCCTAAGTCACCAATTAACCTAAG	354
ba3556	DEL	Chr4	40264181	40264415	AATATAGGCCCCGTTTGTATCCGCTTATAAGCGGCTTATCGGTGGAAATAAGCGAGAATCCCGCCAAACGCTTTGCTTATTTCCACCGATTCTCGCTTATGTGGTAAGCCGCTTCAACGATTTGAACTACGAGAAGCGAAAAGCGAGAAGCGAAAAAATCTTCGCTTAGATTATAATCTAAGCGTGGCTAGGAAAAGCGTATACAAACAGGGCCATAGTTTCCTTTCTTTTCAA	221
ba3588	DEL	Chr5	517249	517672	GGGCACCACAATATACCAAATCTCAAAACCGCAGCGAAATACATAAACATCAGTTTTACTTAAAGGTGTCAAAGAATCGTAAATAAAAACACTAAGACACATGATGCAGTAAAGGTAAATGCTCGTGCATTACAGGGGAAGTAAAACAATAGCGAGAAAATATAATTGATGCTATTTACCTAATGCAACGTGACAATTTGACTACTTGAATCACAAATATCTTAAACTAATAGTAGACTATAAGATAAGATGAAGTATTCTGCGTATTGAACATTGAGCTTCTTACAAATATTGCTCATCTAATCTCTCAAACAGATATATGAGCGCGTGGTGGCCCAGACCTAATGGTGAGGAGTGGGGCGCCGCCATGATTAAGGCCGCCGATGGAAGCAGCAGTTG…	326
pD7323	DEL	Chr5	589208	589358	TTATGCATGGGCCTGTTCGCTTCAGCTTATAAGCCGGCTGAAAAGCCGAAACGGCTGATTTGTTGTGAGAGGAAAACACTGTTTGGTGGCTGATAAGCCGGATGAATAAGCTGAAGCGAACAGGGTGATGTGATCTCCAAGATCTATCTA	147
ba3592	DEL	Chr5	599308	599466	GATAGTGGAGTGGCTGCAGAAGAACATGTAGCGACAACGGGTCTGTTCGCTTCAGCTTATTCAGCCGGCTTATCAGCCACCAAACAGTGTTTTCCTCTCACAACAAATCAGCCGTTTCAGCTTTTCAGCCGGCTTATAAGCTGAAGCGAACAGGCTCA	121
ba3599	DEL	Chr5	669619	670018	TAGTTATTTCTTAGATTAAGGCTTGCCTTTGACTCTTATATCCTTTCGGAATAAAGGGGTGTTTAGTTTTTTAGAATCTCCTAAAATTCCTATCACATCGAATGTTTAGATGCTAATTAGGAGTATTAAATATAGACTAATTATAAAACCAATTGCACAGATGGAGACTAATTTGCGAGATATTAAGCCTAATTGTCTATGATTTGACAATATGGTGCTACAGTAAACATGTGCTAATGATGGATTAATTAGGCTTAATAGATTCATCTCGTGAATTAGCCTCCATCTGTGTAATTAGTTTTATAATTAGCTCATGTTCAGTCCTCCTAATTAACAACCGAATATTCGATGTGACATGAATTTTAGGAGATTTTAAAGAACCAAACATCCTTTAAGTCC	363
ba3603	DEL	Chr5	726296	726712	TTTGGATACGAGGTGCTAAACTTTAACATTGTCATATCGGATATTTGGATGCTGATTAGGAGGACTAAACATGAGCTAATTATAAAACTAATTGCAGAACCTTGTGCTAATTCGCAAGATGAATCTATTAAGTCTAATTAATCCATCATTAGCAAATGGTTACTGTAGCACCACATTATCAAATCATGGACTAATTAGGCTTAATAGATTCGTCTCACGAATTATACTCCATCTGTGCAATTAGTTTTATAATTAACTTATGTTTAGTACTCCTAATTAGCATCCAAACATCCGATGTGATAGGTGTTAAACTTTAATAGGGTGTTCCCAAACATACATGCATCCACATATTCAGTAGAGAAACCATCAGATTCTTTTTTCATTTACAATACAACACTA…	356
ba3606	DEL	Chr5	763280	763692	GGGGGCGTTTGGATGTCAGGGGCTAAACTTTAGCCCTGTCACATCACACGTTCAGATGCTAATTAGGAGGACTAAATATGAGCTAATTAAAAAACTAATAGCAGAACCCATAGGCTAAATCGCGAGACGAATCTATTAAGCCTAATTAATCCATCATCAGCGAATGGTTACTCTAGCCCCACATAGTCAAATCATGGACTAATTAGGCTTAATAGATTCGTCTCGCGATTTAGCCTAGGGGTTGTGCAATTAGTTTTGTAATTAGACTATGTTTAATACTCCTAATTAGTGTCCAAACATCCGATGTGACAGGGGCTAAAATTTAGCCCCTCCCTGCCAAACACCCCCTTAGGCACCATGAGCAAGTCGAAATGCACAACACAAATAGCATCGTAAACA…	354
ba3613	DEL	Chr5	1902380	1902857	GGGTGTTTGGGAAACCCCTGTTAAAGTTTAACACCTGTCACATCGGATGTTTGGATGCTAATTAGGAGTACTAAACATAAGCTAATTACAAAACTAATTGCACAGATGGAGTATAATTCGCGAGACGAATCTATTAAGCCTAATTAGTCCATGAAGAGAGAGAGAGAGAGAGAGGCAGAAATAGATAAATAATGAGTTATAGTGGAATAGACTCAGTATTTCGCTGAATGTGCACAAGGTTCTGCAATTAGTTTTATAATTAGCTCATATTTCATCCTCCTAATTAGCATCCGAACATCCGATGTGACACTGTTAAAGTTTAGCACCTCATATCCAAACAGCCCCGAAGTGAAGAGCTTTCATGACACACCACACACAGTGCAAATCTGCAGCCCTGCA…	359
ba3614	DEL	Chr5	1903987	1904342	CTGTTTTCTTCCACTTGCTAAACTTTAGCACCCGTCACATCGAATGTTTAGATACTAATTAGAAGTATTAAACGTAGACTATTTACAAAACCCATTACATAAGACGAATCTAAACGGCGAGACGAATCTATTAAGCCTAATTAGTCCATGATTTGACAATGTGTTGCTACAATAAATATTTGCTAATGATGGATTAATTAGGCTTAATTAGGCTTAATAGATTCGTCTCGCCGTTTAGATTCCACTTATGTAATTGGTTTTGTAAATAGTCTACATTTACTACTCCTAATTAGTATCTAAACATTCGATGTGACACGTGCTAAAAATAAGATACGGGAAGAAAACGCCCCCTTAC	369
ba3622	DEL	Chr5	1947832	1948164	AATAACCCTGCTACCGCGCTGTCTTGTCTTGCGTTCCATCTTCCACCACGGAAGTGAGGCCGTGTTTAGTTGGGGAATTTGGGAGGTGCCAAATTACTGTTACAGCACTGTAGCACACTGTAGCGTTTCGTTTGTATTTGTGAATTATTGTCCAAATATTGACTAATTAGGCTCAAAAGATTCGTCTCGCAAAGTACAACAAAACTGTGCAATTAGTTTTTAATTTCATCTACATTTAGTACTCCATGCATGTACCGCAAGTTTGATGTGATGGGGAATCTTCTTTTTGCATAGTGTCAAAGTTGGGAGTTGGAAGTAACTAAACATGGCCT	269
ba3627	DEL	Chr5	2019132	2019551	AGAGCTGTGCATGTGGAGGCCTGCACCCATTCCCACCTCGTGTCTGCAACCTTGAACTCCTTATCGTTACAATCTTAGGGGTTGTTTGGATACGAGGTGCTAAACTTTAACAGTGTCACATCGGATGTTCGGATGCTAATTAGGAGGACTAAACATGAGCTAATTATAAAACTAATTGCAGAACCCTGTGCTAATTCGCGAGACGAATCTATTAAGCCTAATTAATCCATCATTAGCAAATGGTTACTGTAGCACCACATTGTCAAATCATGGACTAATTAGGCTTAATAGATTCGTCTCGCGAATTATACTCCATCTGTGCAATTAGTTTTGTAATTAGCCTATATTTAATACTCCTAATTAGCATCCAAACATCCGATGTGACAGGTGTTAAACTTT…	326
ba3628	DEL	Chr5	2039552	2039689	AATGGCGACAGTGCCAAATAAATGCATAATTAAAGAGACATTTTATGATGAATTTATAAAAACAAATTTGATGAATGTTTTTTTATAAATCTGATAAAAATAAAGAAATTAAATTTAGGATAAAACCAAGATTATCT	142
ba3629	DEL	Chr5	2048069	2048213	GTTTTAACTTTTCTAGATACATAGATATTATTATGTATCTAGACATAGGGTATATCTAAGTGCATAACAAAGTCTATGAATCTAATAAAGTCAAAATAACCTATAATTTGGAACGGAGGGAGTACCATATATGTTATATGAAAG	128
ba3630	DEL	Chr5	2054736	2055045	CTTAGATAGTGTTTGGTTCGTGCTAAGGTAATGTAAACGCAAAGGGAATCAAATTACAGTGTATTTAGAGGTGGAATAGGTGATTGCCCTCTTTGTTTGGTTGCACTCTGGTAACGTAATCAGATTACTGTGTGGGTGCTATATCTGATTACGGTGGGGGAGGAGGGGTAACAAGCTTGTATAGATATTATTTAGGTAAGGGATTCGATTACAATGTCAATTGATTACAAACCACCGCAACCAAACATATGTAATGGGATTCGTTACCTTCAGTAATCGGATTACGTTACATTTGAGCTAACCAAACAC	314
ba3649	DEL	Chr5	3344215	3344573	AGTACGTTGGTGCTGTCTAATAGCTGGTCTCATGCACTGACACGTAATCTTAAGACGATTCAACAGGTAACTTGTACAATAGGTTGTCCTATAAGTTTTTTGGTAGTGGTATATAATTCCTTAATTTGTACATAAGAAAAATAAAATATTATGAGTTGCATGTCAACAATAACTCGTACAATGGTTGTTAAGTTGTCTCGTAGTCCTACAATTTAGCTCATGAGGTAGTTGTTTCGCGAAGCAACGACCTCTTTCTCTCTCCTCGCTCTCTCTCCTCCACATCATCAAAAATCCTATGTGGCACTGCATGAGACGACCTATGAGACCGCTGACGTGTAGCAATGTACTTGCCCTTAGC	363
ba3650	DEL	Chr5	3361879	3362207	GGTGCTAAACTTTAACAGTGTCACATCGGATGTTTGGATGCTAATTAGGAGGACTAAACATGAGCTAATTATAAAACTAATTGCAGAACCTTGTGCTAATTCGCGAGACGAATCTATTAAGCCTAATTAATCCATCATTAGCAAATGGTTACTGTAGCACCACATTGTCAAATCATGGACTAATTAGGCTTAATAGATTCGTCTCGCGAATTATACTCCATCTGTGCAATTAGTTTTGTAATTAGCTTATGTTTAGTACTCCTAATTAGCATCCAAACATCCGATGTGACAGGTGTTAAACTTTAACAGGTGTTTCCCAAACACCCCC	355
ba3660	DEL	Chr5	3982552	3982834	TAAAATTTAACACCTGTCACATCGGATGTTTGGATGCTAATTAGAAGTATTAAACATAGGCTAATTACAAAACTAATTGCACAGATGGAGTGTAATTCACGAGACGAATCTATTAAGCCTAATTAGTCCATGATTTGACAATGTGGTGCTACAGTAACCAATTGCTAATGATGGATTAATTAGGCTTAATAGATTCGTCTCGCGAATTAGCACAGGGTTCTGCAATTAGTTTTATAATTAGCTCATGTTTAGTTCTCCTAATTAGCATCCGAACATCCGATG	353
ba3661	DEL	Chr5	4327065	4327416	ACTCCAAGAGAATACTAAAAAATTCTTCCCCAAAACTATGTATTGGGGGTTCTTCCAAAAAATATTTCCTCTAAAAATATATCAGTCCACAGCAGATCGCTAATAAATAGCCCCCAATATTTCAAACACAGGCCACGTCATCGTATTGGGCCCATCGGAAGGGACGCGTGGGCGTGCGGGAATCAGGATTGGGGGAGGAACGCCAACGCTAAAATATACACGGTGGCAGGCTGTTTTTTAGCGTTGCTAAAAAATTGGGGAAGGTTTAGGTGGATTGTTGGAGTTCATTTTTTCTCTCTTTTTTCCTAAAAAAGGTATTGGGGGTAAGATTAGCAGTCTCTTGGAGTTGCT	357
ba3664	DEL	Chr5	4465933	4466330	GGCTTGTTTGGCAACCAGTATTAAAGTTTAACACCCGTCACATCGGATGTTTGGATACTAATTAGGAGTATTAAACATAGGTTAATTACAAAACTAATTGCACAGATGGAGTGTAATTCGCGAGACGAATCTATTAAGCCTAATTAGTCCATGATTTGATAATGTGGTGCTACAGTAACCATTTACTAATGATTGATTAATTAGGCTTAATAGATTCGTCTCGCGAATTAGCACAGAGTTCTGCAATTAGTTTTATAATTAGCTCATGTTTAGTTCTCTTAATTAGCATCCGAACATCCGATGTGACACTGTTAAAGTTTAACACCTCGTATCCAAACACCCCCTTAGTTGTTACTTCTTCCTACCCAACAAATATGAAATATGCATGTAATTATGC	343
ba3666	DEL	Chr5	4962323	4962654	ACACCCTATTAAAGTTTAACACCTGTCACATCGAATGTTTGGATACTAATTAGGAGTACTAAACATAAGCTAATTACAAAACTAATTGCATAGATAGAGTATAATTCGCGAGACGAATCTATTAAGCCTAATTAGTCCATGATTTGACAATATGGTGCTACAGTAACCATTTGCTAATGATGGATTAATTAGGCTTAATAGATTCGTCTCGCGAATTAGCACAAGGTTCTGCAATTAATTTTATAATTAGCTCATGTTTAGTTCTCCTAATTAGCATCCGAACATCCGATATGACACTGTTAAAGTTTAGCACCTCGTATCCAAACAGCCC	344
ba3668	DEL	Chr5	5202698	5203072	CTCTATTATAAATGTCCACCCAAGATTCAGGGGGTGTTTGGGAACAGCGTGCTAAACTTTAGCACCTATCACATCGGATGTTTGGATACTAATTAGGAGTATTAAATATAATCTAATTACAAAACTAATTGCACAGATGGAGTCTAATTCACGAGATGAATCTATTAAGCCTAATTAGTCCATGATTTGACAATGTGGTGCTACAGTAACCATTTGCTAATGATGGATTAATTAGCCTTAATAGATTCGTCTCGCGAATTAGACTCCATCTGTGCAATTAGTTTTGTAATTAGTTCATATTTAGTCCTTCTAATTAGCATCTGAATATTCGATGTGACCCTGCTAAAGTTTAGCACCTCGTATCCAAACACCCC	357
ba3670	DEL	Chr5	5323168	5323315	AGATTGGGTATTCAAAAATTCAGAAGATAAAAGAAATTAGTGTCTCAACCCTGTTTTGTGTCATGAATCATTGACAAATACCATTGATTAGCAAAATAATGGGTATTCAATGAATACCCTTGAATACCCTCTAGGCCCGCCCCTGTT	174
ba3673	DEL	Chr5	5461613	5461944	ATACGAGGTGCTAAACTTTAACAGTGTCACATCGGATGTTCGGATGCTAATTAGAAGAATTAAACATGAGCTAATTATAAAATTAATTGCAGAACCCTGTGCTAATTCGCGAGACGAATCTATTAAGCCTAATTAATCCACAATTAGCAAATGGTTACTGTAGCACCACATTGTCAAATCATGGACTAATTAGGCTTAATAGATTCGTCTCGCCAATTACACTCCAACTGTACAATTAGTTTTGTAATTAGTCTATATTTAATACTTCTAATTAGCATCCAAACATCCGATGTGACGGGTGTTAAACTTTAATAGGGTGGAGCCAAACAGG	359
ba3685	DEL	Chr5	5685609	5686140	GTACTAACCGAAGGTGGTCGTTGTCATTGCCGTCGACGTTGTTAACGTACAGTACGTGATTATACTAGTGACATGCTCCATTTAGGGGACAAATTGTAGTGTCAATGTAATCATTTAACATGGTGAAGGTAAATGATTGGTCTCTTTTCCTTGGAACTGAAGGAGCAAAGGAGGTGCCTCTCATCCATAGATGATGTTATGCAGAAGCATTTTTAGCCTGTTCGCTTCAGCTTATTCAGCCGGCTTATCAGCCACCAAACAGTATTTTCCTCTCACAACAAATCAGCCGTTTCAGCTTTTCGGCCGGCTTATAAGCTGAAGCGAACATGCCCTTTGATTTTTGAGACAAGATAGAAGTAAGCTTTGCAATGAACAAAACAAAATTGGTTTAAAAGGCAG…	127
ba3697	DEL	Chr5	5845282	5845603	GTCGCACCCCGAGCTCACCAAGATTCAAGCTCTACATTTAATTTTGACACGCCGTGTATTTTATTAACGTGATTTAGTATCTTTTAGTGGCAGTAAGCATGATGTTTGGTATAATGATAACTCAATTTCAAGATCTGTCATTCAAGTCCCTATTAACCTTGATAAGGGTGTATGTGCGTGCAATTACCCGAGTCTGCGTTTGTACTACTATTTTTTTTAAAAAAAGTTGAGTTGTTATGGATGACTTAGGATTGAAACATGATTTTCTGCATATAGGGTTTATTCGATTCATAGACTAACATGATCACGCCACACCTCCAG	290
ba3700	DEL	Chr5	5937174	5937580	GGAGCCCATTTTTGTGGAGTTGCTACCCCAACCATTTTCGGCGGAGTCAAGAGCAAGGACATTGCTACACGTCAGCAGTCTCATAAGTCGTCTCATGCAGTGCCACATAGGATTTTTGATGATGTGGAGGAGAGAGAGCGAGGAGAGAGAAAGAGGTCGTTGCTTCGCGAAACAACCACCTCATGAGCTAAATTGTAGGACTAACAACTTAACAACCATTGTACGAGTTATTGTTGCCATGCAACTCATAATATTTTATTTTTCTTATGCACAAATTAAGGAATTATATACCACTACCAGACAACTTATAGGACAACCTATTGTACGGGTTGCATGTTGAATCGTCTCAACATTACGTGTCAATGCATGAGACCGCCTATTAGACGACAACCAATGTAC…	364
ba3702	DEL	Chr5	5975133	5975458	GGGGCTCCAACTTTTAAAATTTTTTTTTTAACAAAATTTTTTCCAAATAAAATGGGGGGTGTTTGGGGCCCAAAATGGGGAGCAAAATTATTCCTATTTTAAAAGGGCTCCCCTCATTTTTTGGGTTTTTTTAGGGTCGTGACAAGTAAATTTCTATGGTATTTGGCATCCCCTCCAGAAACCTATATGTTGTTCTAACCCCCTTGTGGCCAACACAAAAACATTTCTTTTTCGCATGAATTATATGGGTGCAGGTAGCAGGCATGCAAAATGGTTGAAAAGTCATTGGGAACTAGTTATCTGGGGGGGGGGGGGGGGCGGCGGG	300
ba3704	DEL	Chr5	5989538	5989869	TCTAGGATCTCCTAAAATTTCTATCACATCGAATGTTTAGATACTAATTAGGAGTATTAAATATAGACTAATCATAAAATCAATTGCACAGATGAAAACTAATTTGTGAGACGAATCTATTAAGCCTAATTACTCCATGATTTGATAATATGGTGCTACAGTAAACATATGCTAATGATGGATTAATTAGGCTTAATAGATTCGTCTCGTGAATTAGCCTCCATCTGTATAATTAGTTTTATAATTAGCTCATGTTTAGTCCTCCTAATTAACATTCGAATATTCGATGTGACATGAATTTTAGGAGGTTCCAAAGAATCAAACACCCCCT	350
pD7537	DEL	Chr5	6142019	6142224	AAAAGTGAGAGGAGTCGCTGCTGCGACGAGAAAGAAACTGCATGATTGCGCGTCAAGCTCTTGTTTCAGTCATACTCTTTCCGAGTAGTTAGCCTGTTATGCTTAGGCTCTCAATCTCTGGGTAGCCGTTGTCGCTGCGTGTGTGAGATCGTTGTCTCGTATACGCGTATGGGCTTAGGCGTGACAGATGCACCTGAGGCTTTCA	203
ba3709	DEL	Chr5	6290475	6290848	CAGCGACCGCGTGCTTTAATAGGGCCTGTTTGGCTCACCAGTGTTAAAAGTTTAACACACGTCACATCGGATGTTTGAATGCTAATTAGGAGTATTAAACATAGGTTAATTACAAAACTAATTGCACAGATGGAGTGTAATTCGCGAGACGAATCTATTAAGCCTAATTAGTACATGATTTGACAATGTGGTGCTACAGTAACCATTTGCTAATGATGGATTAATTAGGCTTAATAGATTCGTCTCGTGAATTAGCATAGGGTTCTGCAATTAGTTTTACAATTAGCTCATATTTAGTTCTCCTAATTAGCATCCGAACATTCGATGTGACACTGTTAAAGTTTAACACCTCGTATCCAAACACCCCCTAAAC	355
ba3719	DEL	Chr5	6301550	6301816	CGCGCCATCATGCGATTGGGATGGACGGGCGTTTGGTTCCTTTACTTATTTTTAACATGTGTTACATCGAATGTTTAGATACTAATTAGGAGTATTAAACGTAGACTATTTACAAAACCCATTACGTAAGTGGAGGTTAAACGACGAGATGAATCTATTAAACCTAATTAATCCATCATTAGCAAATGTTTATTGTAGCAACGCATTGTCAAATCATGAACTAATTAGGCTTAATAGATTCATCTCGCAAATTAGCGTCCATTTGT	334
pD7556	DEL	Chr5	6309437	6309726	ACCCGCCTCCACGAGAACTACTTCGATGGTGCTCACCCCCACCACCAAAGTACGGTTTCTTTGGCGATCGCTCTACAGCTGAAAAAAAGAAGGCCACGAATCTCCCTAAATTCCGAATCCCCTTCTCAACTGAGCTCGCTAGAGTTGGAGCATTTTGCTAGGGCCTAGAGAAGATGAGCAACTTGTAACAAAAAGGATGCACGATTTTCCAATCGAATACAACGTTAGGAATTTCGAAAGGTTCTGTCGCTGAATCTATTGACACTTTGACAGATACACAGCATTGTGT	288
ba3724	DEL	Chr5	6984008	6984342	GTCTTATTTTTAGCACGTGTCACATCGAATGTTTAGATACTAATTAGGAGTAGTAAACGTAGACTATTTACAAAACCAATTACATAAGTGGAATCTAAACGGCGAGACGAATCTATTAAGCCTAATTAAGCCTAATTAATCCATCATTAGCAAATATTTACTGTAGCAACACATTGTCAAATCATGGACTAATTAGGCTTAATAGATTCGTCTCGCCGTTTAGATTCGTCTTATGTAATGGGTTTTGTAAATAGTCTACGTTTAATACTCCTAATTAGTATCTAAACATTCGATGTGACGGGTGCTAAAAATAAGTCAGTGGAAGAAAACGGGG	356
ba3737	DEL	Chr5	8630613	8630776	CTAACGGTTCAGCAATAGCATGAAAATCTATGTAATTATTGTTCAACTGGTGAAAGGCTAATAAATCGCTGTAAGGTTCTTAGTTCATGTGCTATATAGTCCTAGTATGGTTTTACTGTTTTACCGAGCTACAATACGTCCTATTATTCCTAGGGCAAAATAT	101
ba3739	DEL	Chr5	8635369	8635621	GGGAGTGGCAAAATTGGCATTTTACCATAAATGCGCAACTGTAACATTTCGTTTGTATTTGTGAATTATTACCCAAACATTGACTAATTAGGCTCAAAAGATTCATCTCGCAAAGTACAACAAAACTGTGCAATTAGTTTTTGATTTCATCTACATTTAGTACTCCATGCATGTACCGCAAGTTTGATGTGATGGAGAATTTTCTTTTTGCATAGTGCCAAAGTTGGGATTTTGGAGGGAAGTAAACAAGGG	277
ba3743	DEL	Chr5	8729585	8729964	TGCTCCGGGCATGGGGAGCCGGTACGAGGACCGGTCCAGGCTCACGGGAGGCAGGCTGAAATCATGCAACGAGCTATGTTTGGTTGTCTTTGTTGTTGGTCCAGTATGAGACGGAATCGTGTTTGGCTGCATGTATGGATAAGAGTTTTGGGTGTATGTCACACGGGCCCTGCGCGTTCACCGGCATCGTGCCATCCCGGCTCGTGAGGGAAGGTCGTTTTTGGGCGGACGGAGGGATGCGGGATGGGAGGGGTGGAGTGAACGAGAGGGTGCAGCCATATGGTGCGGGGAGAGCAACCAATCACGTCCAAGTGCATGGGATGATGCCGGATGGCCCTCCGGACGCCACCATCCCACCTACCAATCACGCCCTTAGAGA	387
ba3745	DEL	Chr5	8756687	8757021	AGACTGGCCAAGTGCTCAGACTTCATCAGAGAGGTAGACCTCCCGGGATGCTTGTCTTCGCTTCAGCCTTGTTTTTCACACCCGCTCCCAACTTTAGCACTATGCAAAAAAAAAAATTCCTCATCACATCAAACTTGCGATACATGCATGAAGTACTAAATGTAGACGAAATTAAAAGCTAATTGCATAATTTTGTTGTACTTTGCGAGACAAATCTTTTAAGCCTAATTAGTCAATGTTTGGATAATACAAATACAAACGAAACGCTGCAGTGTGCTACAGTGCTGTAACAGTAATTTGGCACCTCCAAACTTTGACAACTAAACAAGGTCTC	289
ba3747	DEL	Chr5	8819902	8820242	GCAACCATGTGTTAAAGTTTAACACCTGTCACATCGGATGTTTGGATGCTAATTAGGAGTATTAAACATAGGCTAATTACAAAACTAATTGCACAGATGGAGTGTAATTCACGAGACGAATCTATTAAGCCTAATTAGTCCATGATTTGACAATGTGGTGCTACAGTAACCAATTGCTAATGATGGATTAATTAGGCTTAATAGATTCGTCTCGCGAATTAGCACAGGGTTCTGCAATTAGTTTTATAATTAGCTCATGTTTAGTTCTTCTAATTAGCATCCGAACATCCGATGTGACACTGTTAAAGTTTAACACCTCGTATCCAAACACCCCCTTAGC	348
ba3763	DEL	Chr5	9072821	9073194	CCATGAATATTTTGGTTGTCATTGAGGCCTGGTTTGGTTCCGGTTGCTTATTTTTAGCACCCGTCACATCAAATGTTTAGATACTAATTAGGAGTATTAAAAGTAGACTATTTACAAAACTCATTACATACGACGAATCTACACGGCGGATTCTAAGTACTGTGCTCCATGAGTCCATGATTTGACAATGTGTCCTATCCCTGGCATGAAACAAATGATGGATTAATTAGACTTAATAGATTCGTCTCGCCGTTTAGCCTCCACTTATGTAATGGGTTTTGTAAATAGTCTACGTTTAATACTTCTAATTAGTATCTAAACATTCGATATGACACGTGCTAAAAATAAGCAAAGGGAACCAAACGGCCTCTAA	358
ba3764	DEL	Chr5	9083443	9083602	ACATCAAAACATGGCTATGTTTAAACGGCAGACATCAAAAGCTGGCTATAATGAAACAGCAAAATACAATTCCCTAAACACCAATTGCAAAATACCAAGTTGATAGAAAAGTGATGATCTCAGATGTCTTACCTTAACTACCAGAGTCCATCTGTTAAA	169
ba3766	DEL	Chr5	9125126	9125359	CTGGTTTGGTTCCATTTGCTTATTTTTAAGCAAGTGTCACATTAATGTTTAGATACTAATTAGGAGTATTAAACGTAGACTATTTACAAAATCCATTACATAAGTGGAGGCTAAACAGCGAGACGAATCTATTAAGCCTAATTAGTCCATGATTTGACAATGTGTTGCTACAGTAAACATTTGCTAATGAACTGAATTGTTCCATCACAAGCGTGCCGTGCTCATCATCACCC	189
ba3776	DEL	Chr5	9353081	9353411	CTAAATTTTAGCCCCTGTCACATCGGATGTTTGGACACTAATTAGGAGTATTAAACATAGTCTAATTACAAAACTAATTGCACAACCCCTAGGCTAAATCGCGAGACGAATCTATTAAGCCTAATTAGTCCATGATTTGACAATGTGGTGCTACAGTAACCATTCGCTAATGATGGATTAATTAGGCTTAATAGATTCGTCTCGCGATTTAGCCTATGGGTTCTGCTATTAGTTTTTTAATTAGCTCATATTTAGTCCTCCTAATTAGCATCTGAACGTGTGATGTGACAGGGCTAAAGTTTAGCCCCTGACATCCAAACGCCCCCGAAG	351
ba3777	DEL	Chr5	9354802	9355103	TATAAAACAGAAATTCAAGGGACAGCAGCTCTTGTTTACTTTGCGAATTTAGGAGGTGCAAAATTACTGTAGCAACACTGTAGTGTTTCGTTTGTATTTGTGAATTATTGTCCAAATATTGACTAATTAGGCTCAAAAGATTCGTCTCGCAAAGTACAATAAAACTGTGCAATTAGTTTTTGATTTCGTCTACATTTAGTACTCCATGCATGTACCGCAAGTTTGATGTGATAGGGAATCTTCTTTTTGCATAGTGCCAAAGTTGGGAGTTTTGTAGGAAGTGAACAAGGGCTCACGCAAT	278
ba3788	DEL	Chr5	10102168	10102429	TAGTTACTCCCAACTCCCAACTTTGACACTATGCAAAAAGAAGATTCCCCATCACATCAAACTTGCGGTACATGCATGGAGTACTAAATGTAGATGAAATTAAAAACTAATTGCACAGTTTTGTTGTACTTTGCGAGACGAATCTTTTGAGCCTAATTAGTCAATATTTGGACAATAATTCACAAATACAAACGAAACGCTACAGTGTGCTACAGTGCTGTAACAGTAATTTGGCACCCCCAAATTCGCCAAACTAAACAC	285
ba3789	DEL	Chr5	10116402	10116772	TTCTTCCCGTGTCTTATTTTTAGCACGTGTCACATCGAATGTTTAGATACTAATTAGGAGTAGTAAACGTAGACTATTTACAAAACCAATTACATAAGTGGAATCTAAACGGCGAGACGAATCTATTAAGCCTAATTAAGCCTAATTAATCCATCATTAGCAAATATTTACTGTAGCAACACATTGTCAAATCATGGACTAATTAAGCTTAATAGATTCGTCTCGCCGTTTAGATTCGTCTTATGTAATGGGTTTTGTAAATAGTCTACATTTAATACTCCTAATTAGTATCTAAACATTCGATGTGACAGGTGCTAAAGTTTAGCAAGCGGAAGAAAACAGGCCCATAGTACTATAGCTCTTGTCATTA	360
ba3793	DEL	Chr5	10580515	10580854	ACACCCTGTTAAAGTTTAACACCTGTCACATCGGATGTTTAGATGCTAATTAGGAGTATTAAACATAGGCTAATTACAAAACTAATTGCACAGATGGAGTATAATTCGCGAGACGAATCTATTAAGCCTAATTAGTCCATGATTTGACAGTGTGGTGCTACAGTAACCATTTGCTAATGATGAATTAATTAGGCTTAATAGATTCGTCTCGCGAATTAGGACAGGGTTCTGCAATTAGTTTTATAATTAGCTCATGTTTAGTCCTCCTAATTAGCATCCGAACATCCGATGTGACACTGTTAAAGTTTAGCACCTCGTATCCAAACACCCCCTTAATTT	350
ba3796	DEL	Chr5	10841631	10841986	GAACACCCTATTAAAGTTTAACACCTGTCACATCGGATGTTTGGATGCTAATTAGGAGTAGTAAACATAAGCTAATTACAAAACTAATTGCACAGATGGAGTATAATTCGCGAGACGAATCTATTAAGCCTAATTAGTCCATGATTTGATAATGTGGTGCTACAGTAACCATTTGCTAATGATGGATTAATTAGGCTTAATAGATTCGTCTCGCGAATTAGCACAAGGTTCTGCAATTAGTTTTATAATTAGCTCATGTTTAGTCCTTCTAATTAGCATCCGAACATCCGATGTGACACTGTTAAAGTTTAGCACCTCGTATCCAAACAGCCCCTTAAAAGGACGGGCGGCCGCT	361
ba3803	DEL	Chr5	11201327	11201713	CGTTTGTGAATACTTACAATTTTGACCAAACACAATTACTAAGGGGGTGTTTGGGAAACACCTGTTAAAGTTTAATACCTGTCACATCGGATGTTTGGATGTTAATTAGGAGTACTAAACATAAGCTAATTACAAAACTAATTGCACAGATGGAGTATAATTCGCGAGACGAATCTATTAAGCCTAATTAGTCCATGATTTGACAATGTGGTGCTACAGTAACCATTTGCTAATGATGGATTAATTAGGCTTAATAGATTCGTCTCGCGAATTAGCACAGGGTTCTGCAATTAGTTTTATAATTAGCTCATGTTTAATCCTCCTAATTAGCATCCGAACATCCGATGTGACACTGTTAAAGTTTAGCACCTCGTATCCAAACAGCC	351
ba3811	DEL	Chr5	11729159	11729528	ATCAGATTCTCAAAATCCAAAATCCAGAATCTGGATTGCCCTCCAAACATGACAGATTCTGACCCAGATTCTACAATCTAGATTTTGGATTTTGAGAATCCTAGAAGCTGCTCAAAAGTTGATTCTACCAGATTTTGCATGCATATTTTACCATTTTGCCTAGCAACCTTCTAGATAATTATCCAATCTGCTATTGTCCACTCTTTTGGGTAGCAAGGGCATAAAAGACATCTATTCAACAAGCTACTATACAATCAGATTTTGGAATTTATGATCCAAACAACACCGTCCAGATTTTGCTTAGAATCTAGATTCTAGAAATCCATCTAAAATCTAGATTTCAAAATCCACAACTGGATCCAAACGGAG	392
ba3812	DEL	Chr5	11731423	11731716	CGTGAGCTTCCTTCTGTTGGGCCATGTTTAGTTACTCCCAACTCCTAACTTTGACACTATGCAAAAAGAAGATTCCCCATCACATCAAACTTGCGGTACATGCATGGAGTACTAAATGTAGATGAAATTAAAAACTAATTGCACAGTTTTGTTGTACTTTGCGAGACGAATCTTTTGAGCCTAATTAGTCAATATTTGGACAATAATTCACAAATACAAACGAAACGCTACAGTGTGCTACAGTGCTGTAACAGTAATTTGGCACCTCCCAAATTCCCCAACTAAACAAGGCC	302
ba3814	DEL	Chr5	11968344	11968687	TTTGGAAGGAGGAGGCTAAACTTTAGCCCTGTCACATCGGATGTTCGGATACTAATTAGGAGGACTAAACATAAGCTAATTACAAAACTAATTGCAGAACCCCTAGGCTAAATCGCGAGACGAATCTATTGAGCCTAATTAATCCATCATTAGTGAATGGTTACTGTAGCACCACATTGTCAAATCATGCACTAATTAGGCTTAATAGATTCGTCTCGCGATTTAGCCTAGGGGTTGTGTAATTAGTTTTGTAATTAATCTAGGTTTAATACTCCTAATTAGTGTCCAAACATTCGATGTGACGGGGGCTAAAATTTAGCCCCCTCCTTCCAAACACCCCCTA	347
ba3815	DEL	Chr5	12095328	12095596	TTAGTTGGCCAATTTGGGAGGTGCCAAATTACTGTTACAGCACTGTAGCACACTGTAGCGTTTCGTTTGTATTTGTGAATTATTGTCCAAATATTAACTAATTAGGCTCAAAAGATTCGTCTCGTAAAGTACAACAAAACTGTACAATTACTTTTTAATTTCATCTACATTTAGTACTCCATACATGTACCGCAAGTTTGATGTGATGGGGAATCTTCTTTTTGCATAGTGTCAAAGTTGGAAGTTGGGAGTAACTAAACATGGCCAT	272
ba3816	DEL	Chr5	12102241	12102666	AACAGTGTGAGACTCTTCCCCAACCCTTATGAACGGTGAATAACACTATACATATCTAGTAGAAACCACACCCTTCATGAAAACCTGTGCAAACCACGTAAAAAAGTCATATAAATTCACCAATAAAATCACACGTATAGATAATATGATGATGAACAATCTTGTAAAATATCTTGTCCAAACTCGACTTCGTTTGTGAGATATAAAAATAACAAATACCAAGGCTGAAAGTTGTCCAAATGATTTATTAGAATCTTTTATTTTTATATCTCACAAACGAAGTCGAGTTTGGACAAGATATTTTACAAGGATGTGTATCATCATATATCATCTACATGTGTGATTTTTTTTGTGAATTTAGACGAATTTTTATTTTGGTTTGCACAGGTTTTCATGAAG…	380
ba3817	DEL	Chr5	12114224	12114569	AGGGGGTGTTTGGGAAACCCCTGTTAAAGTTTAACACCTGTCACATCGGATGTTTGGATGCTAATTAGGAGTACTAAACATAAGCTAATTACAAAACTAATTGCACAGATGGAGTATAATTCGCGAGACGAATCTATTAAGCCTAATTAGTCCATGATTTGACAATGTGGTGCTACAGTAACCATTTGCTAATGATGGATTAATTAGGCTTAATAGATTCGTCTCGCGAATTAGCACAAGGTTCTGCAATTAGTTTTATAATTAGCTCATATTTAGTCCTCCTAATTAGCATCCGAACATCCGATGTGACACTGTTAAAGTTTAGCACCTCATATCCAAACAGCC	359
ba3822	DEL	Chr5	12587864	12588116	CCAACTTTGACACTATGCAAAAAGAAGATTCCCCATCACATCAAACTTGCGGTACATGCATGGAGTACTAAATGTAGATGAAATTAAAAACTAATTGCACAGTTTTGTTGTATTTTGCGAGACGAATCTTTTGAGCCTAATTAGTCAATATTTGGACAATAATTCACAAATACAAACGAAACGCTACAGTGTGCTACAGTGCTGTAACAGTAATTTGGCACCTCCCAAATTCCCCAACTAAACAAGGCCGAG	287
ba3824	DEL	Chr5	12700137	12700468	TATTTTTAATCACCCGTCACATCGATGTTTAGATACTAATTAGAAGTATTAAACATAGACTATTTACAAAACCCACTACATAAGCGGAGGCTAAACGGCGAGACGAATCTATTAAGCCTAATTAGTTCATAATTTGACAATGTGTTGCTACAGTAAATATTTGCTAATGATGGATTAATTAGGCTTAATTAGACTTAATAGATTCGTCTCGCCGTTTAGCCTCCACTTATGTAATGGGTTTTGTAAATAGTCTACGTTTAATACTCCTAATTAGTATCTAAACATTCGATGTGACACGTGCTAAAAATAAGCAAACGGAACCAAACAGCCC	361
ba3826	DEL	Chr5	12724981	12725328	CAAGGTCGTTGATCGTAAGGAATAAAAAGATCGATCGAGGTCGAAATGTCCTTGGCCTTGTTTACTTCACTCCCAACTTCCAACTTTAGCACTATACAAAAAGAAGATTCCCCATTACATCAAACTTGCGGTACATGCATGGAGTACTAAATGTAGATAAAATTAAAAACTAATTGCACAGTTTTGTTGTACTTTGCGAGACGAATCTTTTGAGTCTAATTAGTTAATGTTTGGACAATAATTTACAAATACAAACGAAATGATACAGTGTGCTACAGTGCCGGTACAGTAATTTTGGCACTCCTAATTTTAATATCTAAACAAGGCCTATCAGATAGGTCTAGTGT	288
ba3827	DEL	Chr5	12751681	12752011	AAGTGTTAAAATTTAACACCTGTCACATCGGATGTTTGGATGCTAATTAGGAGTATTAAATATAGGCTAATTACAAAACTAATTGCACAGATGAAGTGTAATTCACGAGACGAATCTATTAAGCCTAATTAGTCCATGATTTGACAATGTGGTGCTACAGTAACCAATTGCTAATGATGGATTAATTAGGCTTAATAGATTCGTCTCGCGGATTAGCACAGGGTTCTGCAATTAGTTTTATAATTAGCTCATATTTAGTTCTCCTAATTAGCATCCGAACATCCGATGTGACACTGTTAAAGTTTAACACCTCGTATCCAAACACCCCCT	347
ba3831	DEL	Chr5	13229015	13229369	GTAAGGCCCCGTTTGTTTCGATGGAATTGAATTCCATCCTAATAATCATAATTTAGACACAAATTAATTAAGCTAATATAATTGTATGTGAAATATAGTTGTATATTATAGTTGGTGATATGGGAGAGATACTTGTATGCTGCACTTCTACTATAGAGAAGCTAGTCTAAGAGCGTGCTATAAGAATTGAATTCCATTCTAATAACCATAATCTATAGAATCAATTTCCATCTCCCACTCCATGAATTTAAGATAGGCTTATATCTAAACTTTGGAAAGTTGTGGAATGCCACATTACAACATAAATTAGGCTACTCCATTAAATAGATTCCAATTCCTTGGACCCAAACGGGG	355
ba3835	DEL	Chr5	13300291	13300829	CTTATATACACTATATTTAAATATATAACAAAATCTATGCATCTAGAAAAGCTAAAACAACCTACAATTTGAAACGGGAGAGTATCGTATGTTGCAGGCTCCTACAGATATATATGATATATCCTTTCGCTTTCTAAAAAATTCTTGTTTATCTACAGATATATAATTTCCTCTTTATACTTTTCAATGTACTGGTCAATGTTCCTAGTTCGTTGATGTATACTCCCTCTAAATGTCACATTGTTTAAAGGCAAAGGGAGTACTAAACTTTCGTTTCAAAAAAAAATGGAGTACTAAATTTTGTTTGACGTTTTAGAAAGCCTACTATAGCTATTTTTCGTTCATAAGTAGGAACAAGCTTTATCTTCTCACAAAGTTACAAGAATTTTTTTACGACTA…	104
ba3848	DEL	Chr5	13316597	13316950	ATACGAGGTGCTAAACTTTAACAGTGTCACATCGGATGTTCGGATGCTAATTAGGAGGACTAAACATGAGCTAATTATAAAACTAATTGCAGAACCTTGTGCTAATTCGCGAGACGAATCTATTAAGCCTAATTAATTCATCATTAGCAAATGGTTACTGTAGCACCACATTGTCAAATCATGGACTAATTAGGCTTAATAGATTCGTCTCGCGAATTATACTCCATCTGTGCAATTAGTTTTGTAATTAGCTTATGTTTACTACTCCTAATTAGCATCCAAACATCCGATGTGACAGGTGTTAAACTTTAACAGGTGTTTCCCAAACACCCCCTCCGAGAGAAAAAGAAAGC	383
ba3909	DEL	Chr5	23386008	23386256	TATTCAGCCGGCTTATTAGCCACCAAACAGTGTTTTCCTCTCACAACAAATCAGCCGTTTCAGCTTTTCAGCCGGCTTATAAGCTGAAGCGAACAGGCCATGAGATTACTGAACACACAGCTCGTCGTAATGACTGAAATTGCTGAGAAAAAAAGGGGTCACCAGTCACCACCGAGACGTGCGCTGTCCCGTGGGCCTTGACCGGATCGCTGGACGCGCTAGAACAACCAAGCAGCCGATCAATACAA	125
ba3914	DEL	Chr5	23542051	23542379	GCTAAATTTTAGCCCCTGTCACATCGGATGTTTGGACACTAATTAGGAGTATTAAACATAGTCTAATTACAAAACTAATTGCACAACCCCTAGGCTAAATCGCGAGACGAATCTATTAAGCCTAATTAGTCCATGATTTGACAATGTGGTGCTACAGTAACCATTCGCTAATGATGGATTAATTAGGCTTAATAGATTCGTCTCGCGATTTAGCCTATGGGTTCTGCTATTAGTTTTTTAATTAGCTCATATTTAGTCCTCCTAATTAGCATCTGAACGTGTGATGTGACAGGGCTAAAGTTTAGCCCCTGACATCCAAACGCCCCCT	351
ba3915	DEL	Chr5	23570162	23570348	GCATCTGCACTCATGGGCAGGGGCGGATCCAGGGCCCGGGCTGCAGCCCGGGGCGAGACCATGGAGTCCCTTTAACCTATGTGCTGTTTAGCCTAACAAAATGAGACTTAGGAGACAAAATTAGACTATTTTAGGTGTGATTCAACAGCTCAGCCCGGGGCGCAGTCCCGTTCTGGATCCGCCCCT	188
ba3923	DEL	Chr5	23762671	23762827	CCAAATAGTTGCTCAATAGTGTAGAATAGTGAATGAATAGTGCCGCCATTTTTCGCTCATGCTGAGGTGCTCACCCGCACATATCATATTTACTGTATAGTTGCTGAAAGAGACCCCAAATAGTTGCTCAATAGTGTAGAATAGTGAATGAATAGT	119
pD7836	DEL	Chr5	23972716	23972860	GTTGTTTTTGCTATTTTGCCGAGTGTATTTGTTTGCCGAGTGTTTCCACTGACGGACACTCGACAAACAATTTCTTTGCCGAGTGCCAAACAATTACACTCGGCGAACATATTTCTTTGCCAAGTGCCTGCCTATGCCGAGTTT	141
ba3928	DEL	Chr5	24035855	24036045	TTCACCCTAAAGATTTTTTAAAACTGATAAATTGGCATGCTTTAACATTACACCGAAACATGGTATATCTTACAATGTAGTGCAACACAAGTGTGATGGAGATCACCACCGGAGAGGTGAGCTTTAGTAAGAAAAGTTATTAAAAGAAATATACGTACATGGTATATCTTACAATGTAGTGCAACACAAG	109
ba3935	DEL	Chr5	24091631	24091838	CCCATCACATCAAACTTGCGGTACATGTATGGAGTACTAAATGTAGATGAAATTAAAAACTAATTGCACAGTTTTGTTGTACTTTGCGAGACGAATCTTTTGAGCCTAATTAGTCAATGTTTGGACAATAATTCACAAATACAAACGAAACGCTACAGTATTGCTACAGTAATTTGGCACCTCCCAAGTTCACCAAGTAAACAAGGG	271
ba3941	DEL	Chr5	24250089	24250453	TTACAATAACTTAATGTTTTTTACATCATAGCTACTCAAGGTCTATCTAACCGGCTACTTCCTTAGCAATGGGAGCCATCTCCTGCAGGTATTGTTGGAATTACTCATCAGTGCAATCTTTGGCAATCCCTTTTGCCACAGGAGCCAAGTCGGCCTGCAGGTAGAACGACTTTACCAAGGCCAACAACTGCTTTGAGATGGACTCTACCATCTTCTGGATATAGCTGGTGATCTTCACGGGTACTTCCTTCAGTATCTATGCTAAAGGATGGGGCTCCACCATCTTTTGGGGGCTCCACCATGTCGGCGACAGGCTGAGCAGTTTCTGTCAACTCCTTCAGAGCAAGTTTAGTTGCCACCAACT	367
ba3944	DEL	Chr5	24315307	24315455	TGCCCGGGCTGCAGCCCGGGGCGAGACCATGGAGTCCCTTTAACCTATGTGCTGTTTAGCCTAACAAAATGAAGCTTAGGAGACAAAATTAGACTATTTTAGGTGTGATTCAACAGCTCAGCCCGGGGCGCAGCCCCGTTCTGGATCC	190
ba3949	DEL	Chr5	24524977	24525446	CTTAATCCAGAGTTGTCGAGCTGTGACGTGGCGATCCGAATTGAATTCAAATCTTCCAATCTTCGAACTCATTCTTAGGCCCCGTTTGCTTCCGCTGACTTATTTTTAGCACCCATCACATCAAATGTTTAGATACTAATTAGGAGTATTAAACGTAGACTATTTACAAAATCCATTACATAAGTCGAGGCTAAACGGCGAGACGAATCTATTAAGCCTAATTAGTCTATGATTTGACAATGTGTTGCTACAGTAAAATATTTGCTATGATGGATTAATTAGGCTTAATAGATTCGTCTCGCCGTTTAGCCTCCACTTATGTAATGAGTTTTGTAAATAGTCTACATTTAATAATTAGTATCTAAACATTCTATGTGACACGTGCTAAAAATAAGTCAC…	360
pD7911	DEL	Chr5	24734113	24734265	ATACTCCCTCCGTTCCAAATTATAGGTCGTTTTGACTTTATTAGATTCATAGACTTTGTTATGCACTTAGATATACCCTATGTCTAGATACATAATAATATCTATGTATTTAGAAAAGTCAAAACGACCTATAATTTGGAACGGAGGGAGTA	149
ba3961	DEL	Chr5	25004110	25004285	CGCTTCAGATTATTCAGCCGGTTTATCAGCCACCAAACAGTATTTTTCTCTCACAACAAATTAGCCGCTTCAGCTTTTTAGCTGGCTTATAAGCTGAAGCGAACAGGCCGAATATGTGTCGAACGATGAACTGTGCCAATTCGGATTTACAAGAACCGGAGACAGATGGCACCAG	125
ba3962	DEL	Chr5	25006449	25006798	CTAAACTTTAGCCCTGTCACATCACACGTTCAGATGCTAATTAGGAGGACTAAATATGAGCTAATTAAAAAACCAATAGCAGAACCCATAGGCTAAATCGCGAGACGAATCTATTAAGCCTAATTAATCCATCATTAGCGAATGGTTACTGTAGCACCACATTGTCAAATCATGGACTAATTAGGCTTAATAGATTCGTCTCGCGATTTAGCCTAGGGGTTGTGCAATTAGTTTTGTAATTAGACTATGTTTAATACTCCTAATTAGTGTCCAAACATCCGATGTGACAGGGGCTAAAATTTAGCCCCTCCCTGCCAAACACCCCCCTAGTATCCCAGATAAATCAAAA	346
ba3976	DEL	Chr5	25424461	25424976	TCTTTTTGGTCGGCAAACCCTTCACCCTTGACATAGCTTGCTCTGTTTCAAACATTTTAACATTCACCTAAGTGAGATCTTTACGGTTACTAATCTGACGTTAAGATCTAGCAACACCGTCCCGCGGGGTCACATAGGTTGTGTTTGGTTGCCTGGATAAGTCCCTGACCAGGCTAGTCTAATGCAGCTTGTGATTGTTTGGTTGCCTGTCTAGAGTACATAGCCAGGCCAGCGCAATGCAAAAAAGCACCTAAGCCAGGCTACACTAGTACGCCCGAAACGGACGTACTAGCTGAGCCAGGCTAGATCTTAACCAGGCTAGATTTAAGCCATGTAACCAAACACACTCATAGGCCAGTGAATTCTTTCTAAGAGCATGTGGATCGGTAAATATAGGCC…	213
ba3984	DEL	Chr5	25733403	25733565	TTGCATGTGCTCTATACATATCTGAAAGATTGTGTTGTTTGACTTAGCTAAGCTGTGAATCACCTCTTGGTGACAATTAAAAAGTTGCATTACTTTCTATAAGATTTCCAAAATGTTAAATAGCATATCTTTTGGGGGTTTATAACTCCAGATATGGTTGTC	178
ba3989	DEL	Chr5	25749853	25750123	TGCTCTTTCTCCAATTGATGTTGGAAACATATCTGGTGCAAACCATCTACCCCGTGCAACCTTGGAAACTATGAATCAAGGTCACATGATGCTAATCCAATGGATAGGGTTAGAGGTGGGATTATTTTACGCTTAAGCCTCCCCCACCCCCACCCACGGACGCCTGACTGCAGGGGGTATTGGAAAAAGTGGCCGGCGGGTGGGGGGCTTAAGCGCAAAATAATCCCACCACTAACCCTATCCATTTGATTAGCATCTTGTAGCCTTGAT	154
ba3990	DEL	Chr5	25777482	25777759	GGTGCCAAATTGGTATTTTGCCATAAATGCGACACTGTAGCGTTTCGTTTGTATTTGTGAATTATTGTCCAAATATTGACTAATTAGGCTTAAAAGATTCGTCTCGCAAAGTACAACAAAACTGTGCAATTAGTTTTTGATTTCGTCTACATTTAGTACTCCATGCATGTACCGCAAGTTTGATGTGATAGGGAATCTTCTTTTTGCATAGTGTCAAAGTTGGAAGTTTGGAGGGAAGTAAACAACGGGCAAAATGCAAAGGACACTGCATCTAACT	275
ba3996	DEL	Chr5	26091638	26091913	GATTGAGCAAGGACCTCTAGTTTACTGCAAATATCATGTAAGATGGCTAAAAACAAATATCAAGCAAAATGTAGTACTCCTTTTTTTTTAGACCAGCCTTTGATCACACTTAGAAAGCAATATATGTGTGGACAGAGCGAGTATGTTATTATGAATAGTGTTACATTGACTTTTAATAAAAAATCTAAAACGACTTACAATTTGGAACGGACGAGCATGTCCTATTGACCGTGCGCCAAAGTTTGCCGTGCAAATGACATTTCGATTGAGCAAGG	268
ba4010	DEL	Chr5	26253697	26254139	GTTTGGTAGGGCTTCTCAAAGTGCTTCTCCACCGGCTTTTGATGAAGCCCTACCAAAGGGTCAATTTCAAAACGGCTTCACCACCAAAGCCGAGGAGAAGCCGCAAAACGGCTTACACTAGAGAGGAGAAGCCGAAAAAAGTGGCTTCACCGGCTTCTCCTCTCTCTCCAAGCATTAAGTGATCATAAAATTACATATATTGCCATTGAGAAGCCGTTTTACCAAACGTTTTGCAAAACGGCTCCAGCTTCACTAAAAAAGCCACTCCACCGAAGAAGCCGAAGCCGAAGCCGTTTTATGAGAAGCCGAAGCTCTACCAAACGGGGCCTTAGTATCTTTACAGAAATCAGGAAGTCTGAACTCAGGAAAGATAGCGGATTATTACCATACCACAAATTT…	385
ba4023	DEL	Chr5	26385492	26385823	GAGCAATGCTCTCTTGCTTGCTTCAGAACTGGTACCAAATAGATAGTGATACGGAGAAAGTATTAGAGCAAGTATAATAAGGGGCTGTAAGCTGGCTGAATGCTGACGTGGAGGAGAGAGAAGAGGTGAGAGAGGAGAAGCGGGCTATAAGCTTACAGCCGACTTGGGCACAGGAACCAAGAAACTTTGTGAGAATGACTTGTGGGCCATGTATTAATGGTGAAGAGCTAACCATTGTACGAGTGGGCTAGGAAAAGGCTGAGAGAAATCTTGCAGCCCGCTTGCTAGCTGCGTTATTAAACTTGCTCTTAGCATATTGTTGCTTCTGTTG	253
ba4024	DEL	Chr5	26386370	26386793	ACGACGCAAACTCCTTCGGTGGTGTTTGGGAGGCATGAGCTAAATTTTAACCCCTATCACATCGGATGTTTGGATACTAATTAGGAGTATTAAACATAGACTAATTACAAAACTAATTGCACAACCCCTAGGCTAAATCGCGAGACGAATCTATTAAGCCTAATTAGTCCATGATTTGACAATGTGTTGCTACAGTAACCATTCGCTAATGATGGATTAATTAGGCTTAATAGATTCGTCTCGCAATTTAGCCCAGGGGTTCTGCTATTAGTTTTATAATTAGCTCATGTTTAGTCCTCCTAATTAGCATCCGAACATCCGATGTGACAGGGCTAAACTTTAGCCCCTGCTATCCAAACACCCCTTTCGTTGGACCTGTTGCTCCTGCTGGCTGCTACT…	353
ba4027	DEL	Chr5	26414052	26414525	GTGCCAGTCACCTAGTTCTCTCTGTAGCTTGCCACCTGCAGTTATTCGAACACAAGATAAGGAGAAAAGTAAGCTTGGGGTGTTTGGATGCGGGTATTAAACTTTAGGAGGGGTCACATCGGATGTTCGGACGCTAATTAGGAGGAGTGAACATGAGCTAATTATAAAACTAACTGCAGAACTCCTATACTAATTCGCGAGATGAATCTATTAAGCCTATTTAATCCATCATTAGCAAATGGTTACTGTAGCACCACATTGTCAAATCATGGACTAATTAGGCTTAATAGATTTGTCTCGCGAATTAGACTCCATCTGTGTAATTAGTTTTGTAATTGGACTATATTTAATACTCCTAATTAGTGTCCAAACATCCGATGTGACATGTACTAAATTTTT…	353
ba4040	DEL	Chr5	26573782	26574130	TTAGGCCCCGTTTGTTTCTTTACGAGCTCCTAAAATTCCTATCACATCAAATGTTTGATTACTAATTAGAAGTATTAAATATAGACTAATTACAAAACCAATTGCACAGATGGAGGCTAATTTGCGAGACGAAACTATTAAACCTAATTAGTCCATGATTTGACAATGTGGTGCTACAGTAAACATGTGCTAATGATGAATTAATTAGGCTCAATAGATTCATCTCGGGAATTAGCCTCCATCTGTGTAATTAGTTTTATAATTAGCTCATGTTTGATCCTCCTAATTAACCTCCAAATATTCGATGTGACCTTAATTTTAGTTGGGACTAAAGATCCAAACACCCCA	348
ba4041	DEL	Chr5	26634346	26634680	CGAGGTGCTAAACTTTAACAGTGTCACATCGGATGTTCGGATGCTAATTAGGAGAACTAAACATGAGCTAATTATAAAACTAATTGCATAATCCTGTGCTAATTCACGTGACGAATCTATTAAGCCTAATTAATCCATCATTAACAAATGGTTACTGTAGCACCACGTTGTCAAATCATGGACTAATTAGGCTTAATAGATTCGTCTCACGAATTACACTCCATCTGTGCAATTAGTTTTGTAATTAGTCTATGTTTAATACTCCTAATTAGCATCCAAACATTCGATGTGACGGGTGTTAAACTTTAACACCAGGGAGCCAAACAGGCCCTTA	353
ba4042	DEL	Chr5	26635018	26635308	AGTTACTTCCAACTCCCAACTTTGACACTATGCAAAAAGAAGATTCCCCATCACATCAAACTTGCGGTACATGCATGGAGTACTAAATGTAGATGAAATTAAAAACTAATTGCACAGTTTTGTTGTACTTTGCGAGACGAATCTTTTGAGCCTAATTAGTCAATATTTGGACAATAATTCACAAATACAAACGAAACGCTACAGTGTGCTACAGTGCTGTAACAGTAATTTGGCACCTCCCAAATTCCCCAACTAAACACGGCCTTGTTTGTGTGGTTGCTATGTATAAG	282
ba4043	DEL	Chr5	26648010	26648152	ATACCTATAATTTAAAATGGAAGGAGTTCGCTTCAGCTTATTCAGCCGGCTTATCAGCCATCAAACAGTATTTTCCTCTCACAACAAATCAGCCGTTTCAGCTTTTCAGCCGGCTTATAAGCTGAAGCGAACAGGCCCATGC	113
ba4044	DEL	Chr5	26661894	26662221	TGAATTCCATCATAATAATCATAATTTAGACACAAATTAATTAAGCTAATATAATTGTATGTGGAATATAGTTGTATATTATAGTTGGTGATATGGGAGAGATACTTATATGCTGCACTTCTACTATAGAGAAGCGAGTCTAAGAGCGTGCTATAAGAATTGAATTCCATTCTAATAACCATAATCTATAGAATCAATTTCCATCTCCCACCCCATGAATTTAAGATAGGCTTATATATAAACTTTGGAAAGTTGTGGAATGCCACATTCCAACATAAATTAGCCTACTCCATTAAATAGATTCCAATTCCTTCGTACCAAACGGGG	348
ba4045	DEL	Chr5	26663744	26664136	CAAGGTTTCATTACACTGTTTCCAAGGATGCCACGTCATCCCATGAAGTGTATTCTCATGAATGAAATAGGGAGTCCCAGTGCACAGTTTCATTTCACGATTTCATAGGATGCCCATGGCATTTAATTGTGAGGCATGTGATTAGATATGATTAGATGAAATGAAACTCTATAGCCCCCAATGCAAATTTCAATAGGTTTCATAGTCTTGGAAATCGTGTATACACAGTTTTATCCTGATGAAACTCCTTCCCTCTCTCACTTCACAACTACCATGCCATATCATCACATATGTTGATGTGTCACCGTATTTAATGTGCATGAAACCTCTATAAAACTCCCACTGGGATTAGCCTAACAACCTAGCAACTTGCAGCAGATAGTGGGGAATCG	351
ba4058	DEL	Chr5	26683040	26683686	TGTGACCTGATGAATCCACAAGCTGTTCACCATCTACTGTCAATATCGGGACTTTCTTGTAATCAGACCACTTGATTTCCTTTTTGCTCAATGGATTAACTTCCACAACCTTGTATGGTATATCATGATAGTCTAAAAAGGCTGATATGAAGGCAATGGAAAAAAGGTTTATGTCATGGCTGTGGGAACATCAAAATTCAAGAAAAGAACAAGGTACTGTTTCCATGCAGACAATGTCTATTGCCCTCCCGCTCTTATGCAATGGAAAACCAATATTGACACAAAAATCTTAACAAACTAGCACTACTCTCAGCTAGCCTGTTCGCTTCAGCTTATTCCGTCGGCTTATCAGCCACCAAACAGTGTTTTCCTCTCACAACAAATCAGCCGTTTCAGCTT…	127
ba4064	DEL	Chr5	26785035	26785213	TGATATGCATGTTAGCAGTCAGTAACATATTGGCAGTTAACAATTTAGTGGAGTAATTTTACATAGGAAACAAAGCTCCCATGAGCAGTTCATTGGAGAAATGTGCACACAGACATAGAAGGGATGTTGTATTATACCAAACGTTTGCTTTAGTAGCAGCCTAGCAGACAAGTAGCCC	181
ba4066	DEL	Chr5	26901680	26901944	TTTAGTTACTCCCAACTTCCAACTTTGACACTATGCAAAAAGAAGATTCCCCATCACATCAAACTTGCGGTACATGCATGGAGTACTAAATGTAGATGAAATTAAAAACTAATTGCACAGTTTTGTTGTACTTTGCGAGACGAATCTTTTAAGCCTAATTAGTCAATATTTGGACAATAATTCACAAATACAAACGAAACGCTACAGTGTGCTACAGTGCTGTAACAGTAATTTGGCACCTCCCAAATTCCCCAACTAAACACG	282
ba4054	DEL	Chr5	26902736	26902972	ATGCATGGAGTACTAAATGTAGACGAAATCAAAAACTAATTGCACAATTTTGTTATATTTTGCGAGACGAATCTTTTGAGCCTAATTAGTCAATGTTTGGACAATAATTTACAAATACAAACGAAATGCTACAGTTACGCATTTATGGCAAAATGCAAACTTTACCACTCCCAATTTCCCAACTAAACAGGCCCTTCTTCGTGCGTAGAGTGAACGCAGGAGCAAATGCACCACCT	281
ba4080	DEL	Chr5	27183786	27183949	AGCATGAGAAGGAAAGTATTTCAATTAAATAAAAAATTAGCGGCCTGTTCGCTTCAGCTTATTCAGCTGGCTTATCAGCTATCAAACAGTGTTTTCCTCTCACAACAAATCAGCTGTTTCAGCTTTTCAGCCGGCTTATAAGCTGAAGCGAACAGGCCCTAGA	128
ba4084	DEL	Chr5	27280224	27280373	AAAAGCCATAAGTTCAAACAAACAGCGTATTTCACGTAAAAAAAGTTCAAAGTTGCAGCTCAAACAAACAGGCCTAAAATCGATAACTAAAGGAGTAGTAACTTCAGGCTAGAGCCTAGAGGGAAAATAGGACATTAATCATAACCCAA	116
ba4086	DEL	Chr5	27332439	27332745	AACTTCCAACTTTGACACTATGCAAAAAGAAGATTCCCCATCACATCAAACTTGCGGTACATGTATGGAGTACTAAATGTAGATGAAATTAAAAAGTAATTGTACAGTTTTGTTGTACTTTACGAGACGAATCTTTTGAGCCTAATTAGTTAATATTTGGACAATAATTCACAAATACAAACGAAACGCTACAGTGTGCTACAGTGCTGTAACAGTAATTTGGCACCTCCCAAATTGGCCAACTAAACAAGGCCCAAGTACCCAACCCCCACATGCTCACGTTGGACGCGATGTCCTTGCCCTCCG	273
ba4105	DEL	Chr5	27509514	27509915	TTAAGCTAATATAATTGTATGTGGAATATAGTTGTATATTATAGTTGGTGATATGGGAGAGATATTTATATGCTGCATTTCTACTATAGAGAAGCGAGTCCAAGAGCGTGCTATAAGAATTGAATTCCATTCTAATAATCATAATCTATAGAATCAATTTCCATCTCCCACCCATGAATTTAAGATAGGCTTATATCTAAACTTTGGAAAGTTGTGGAATGCCACATTCCAACATAAATTAGCCTACTCCATTAAATAGATTCCAATTCCTTCAAAATGAAAGGACCCAAACGGGACCTTAGAGCAAATTCTTAGCTTTTCTCTCTGAAAATTCCAACTACCTGAAAAAAAAAACTGTGTTTTCACAGATTGTAAACGCACATTGTGCCGTGTGGTATC…	393
ba4112	DEL	Chr5	27741169	27741424	ATTTGGGAGATGCAAAATTACTGTGCCAGCACTGTAGCACACTGTAGCGTTTCGTTTGTATTTGTGAATTATTGTCCAAATATTGACTAATTAAGCTCAAAAGATTCGTCTCGCAAAGTACAACAAAACTGTGCAATTAGTTTTTAATTTCGTCTACATTTAGTACTCCATGCATGTACGGCAAGTTTGATGTGATGGGGAATCTTCTTTTTGCATAGTATCAAAGTTGGAAGTTGAGGAGTACCTAAACATGGC	282
ba4117	DEL	Chr5	27867605	27867814	CATGATGCATACATGGATGATCCTGGATGGGATGGTTCAACCAATTTACTTGTACCATATGGTTCACTCTAATTAGTAGAATAATGTATTAAGTGGGATGGTCTCATCCTGGATGAGTTGGTCCAATTCACCCAACAAAACAAAATGATCATTATTATTTTGAATCATTTCATACATGACTCAAATGATACAACCAACCAAACACACCC	234
ba4126	DEL	Chr5	28041996	28042256	CGAACGGTAATCTCTCACTAAGGCCTTGTTTAGTTGGCCAATTTGGGAGATGCAAAATTACTGTGCCAAATATTGACTAATTAGGCTCAAAAGATTCGTCTCGCAAAGTACAACAAAACTGTGCAATTAATTTTTAATTTCGTCTACATTTAGTACTCCATGCATGTACCGCAAGTTTGATGTGATGGGAAATCTTCTTTTTACATAGTGTCAAAGTTGGGAGTTGGGGGTAACTAAACATGACCTAAATTTGTCAGCTG	234
ba4129	DEL	Chr5	28054157	28054346	TGTTCGCTTCAGCTTATAAGCCGGCTGAAAAGCTGAAACGACTGATTTGTTGTGAGAGGAAAATACTGTTTGGTGGCTGATAAGCCGGCTGAATAAGCTGAAGCGAACAGGCCGATAAAGCGGTTCATTAAACGGTATTGGGTGCAGCGACAAGTCCTCCGTCTCACGTCTCTACAGCTTAAAAAAACA	121
ba4130	DEL	Chr5	28056752	28057266	GCATTAGGAAATAGATCAGTGAGATGTACATATGGAAGAGTTGTGCTTGAGAAGAGAATTTCAGGGGATAATTTCACAGGTATGGATGTACTCCAAATGACTGCAAGTTGCATCTGCTGAAACATCCATCTTTCTGAGTGACTCTGACAATGTATGCACTATAGTACACCTTTCTGATTACAATATCTTTGATTTTTATGTAGAAATTTTGGGCCTATTCGCTTCAGCTTATAAGCCGGCTGAAAAGCCGAAACGGCTGATTTATTGTGAGAGAAAAATACTATTTGGTGGCTGATAAGCCAGCTGAATAAGCTGAAGCGAACAGGCCCTTTGTACCAAGGCAACAGTTTAAGGTTGCTTCCTTTAATTGTTCTTTCAGAATGTACTGTTACTGTATTC…	123
ba4155	DEL	Chr5	28774232	28774520	AATTTCTGTTCCTAAGGCCATGTTTAGTTACTCCCAACTCCCAACTTTGACACTATGCAAAAAGAAGATTCCCCATCACATCAAACTTGCGGTACATGCATGGAGTACTAAATGTAGATGAAATTAAAAACTAATTGCACAGTTTTGTTGTACTTTGCGAGACGAATCTTTTGAGCCTAATTAGTCAATATTTGGACAATAATTCACAAATACAAACGAAACGCTACAGTGTGCTACAGTGCTGTAACAGTAATTTTGCACCTCCCAAATTCCCCAACTAAACACGGC	273
ba4156	DEL	Chr5	28793420	28793763	TTCCCGTGTCTTATTTTTAGCACGTGTCACATCGAATGTTTAGATACTAATTAGGAGTAGTAAACGTAGACTAATTACAAAACCAATTACATAAGTGGAATCTAAACGGCGAGACGAATCTATTAAGCCTAATTAAGCCTAATTATTCCATCATTAGCAAATATTTACTGTAGCAACACATTGTCAAATCATGGACTAATTAGGCTTAATAGATTCGTCTCGCCGTTTAGATTCGTCTTATGTAATGGGTTTTGTAAATAGTCTACGTTTAATACTTCTAATTAGTATCTAAACATTCGATGTGACGGGTGCTAAAGTTTAGCAAGTGGAAGAAAACAGGCCC	349
ba4157	DEL	Chr5	28989963	28990232	CGCTTGCTAAACTTTAGCACCCGTCACATCGAATGTTTAGATACTAATTAGAAGTATTAAACGTAGACTATTTACAAAACCCATTACATAAGACGAATCTAAACGGCGAGACGAATCTATTAAGTCTAATTAGTCCATGATTTGACAATGTGTTGCTACAGTAAATATTTGCTAATGATGGATTAATTAGACTTAATTAGGCTTAATAGATTCGTCTTGCCGTTTAGATTCCACTTATGTAATTGGTTTTGTAAATAGTCTACGTTTAC	350
ba4158	DEL	Chr5	29240348	29240678	ACACCCTGTTAAAGTTTAACACCTGTCACATCGGATGTTTGGATGCTAATTAGGAGTATTAAATATAGGCTAATTACAAAACTAATTGCACAGATGGAGTATAATTCGCGAGACGAATCTATTAAGCCTAATTAGTCCATGATTTGACAATGTGGTGCTACAGTAACCATTTGCTAATGATGGATTAATTAGGCTTAATAGATTCGTCTCGCGAATTAGCACAGGGTTCTGCAATTAGTTTTATAATTAGCTCATGTTTAGTCCTCCTAATTAGCATCCGAACATCCGATGTGACACTGTTAAAGTTTAGCACCTCGTATCCAAACAACC	352
ba4167	DEL	Chr5	30069651	30069990	TTGGCAACCAAGTGTTAAAGTTTAACACCCGTCACATCGGATGTTTGGATGCTAATTAAGAGTATTAAATATAGGCTAATTACAAAACTAATTGCATAGATGGAGTGTAATTCGCGAGACGAATCTATTAAGCCTAATTAGTCCATGATTTGACAATGTGGTGCTACAGTAACCATTTGCTAATGATGGATTAATTAGGCTTAATAGATTCGTCTCGCGAATTAGCACAGGGTTCTGCAATTAGTTTTATAATTAGCTCATATTTAGTTCTTCTAATTAGCATCCGAACATCCGATGTGACACTGTTAAAGTTTAACACCTCGTATCCAAACACCCCCT	348
ba4171	DEL	Chr5	30619279	30619473	AGGTGGAATAATTAGTGGCCCGGTCGATGTGCTGAACTTGTTATGGGACAGGTGGATGTATTCTACTCCCTCCGTTCCAAATTATAAGTTATTCTAACTTTTTTGGAGAGTCAAACCATTTTATGTTTGACCAAAATTATAGAGAGGATCAATAAAATTTATAGCACCAAATAGATATATTATGAAAATATATT	215
ba4173	DEL	Chr5	30672371	30672531	TAGTCACGCTTGGATTATAATCTAAGCGAAGATTTTCTCGCTTCTCGCTTTTCGCTTCTCGTAGTTCAAATCGTTGAAGCGGCTTACCACATAAGCGAGAATCGGTGGAATGCTTATTTCCACCGATAAGCCGCTTATAAGCGGATACAAACGGGACCTG	182
ba4177	DEL	Chr5	30752605	30752999	GTTTAGTTCCTCAAAACTTCCAATTTTGACACTATGCAAAAAGAAGATTCCCCATCATATTAAACATGCATGGAGTACTAAATGTAGACGACATCAAAAACTAATTGTACAGTTTTGTTGTACTTTGCGAGACGAATCTTTTGAGCCTAATTAGTCAATATTTGGATAATAATTCACAAATACAAACGAAACGCTACAGTGTGCTACAGTGCTATATAACAGTAATTTTGCACCTCCAAACTTTGGGCAACTAAATAAGGTCTAAATCTAAAATCTAGCAAGGTCGCTATCCTCGTACCAGCAATGTCGCCAACAGTGTCGTTGGTTTAGTTCACTAGCTAGTTTATACTCCATCTATTTCAAAATATAGATCGTTTAAGTTAATATCTGGTAA	269
ba4194	DEL	Chr5	31590866	31591249	TTTAACACCCCACTTTTAATACTTTTTAACAATTTCCTATCCAAACACTTGTGTTAAAAGTGGGGTGTTAAAGTTTAACACCCCATTTTTCATAAACACATGGAGGGGGTGTTAAAACTTGCTAAAGGTATTAAAAGTGGTCTCCCTCTTCCACTTTTCCCAGGTTACCCCTTCTCTCTCCTCCCTCTCTCCGCCGGCCATAAATGAGGGGACAATGGAGTCATTTCCCACCAAAAATGTTAAAGTTTAACACATCATCCAAACACCCCAATGTGTTAAACTTTAGCACCCTATTTGAGAGTGTTAAAATTTTAACACTTGTTAAATTTTAACACAGGTATCCAAACAGGCCCTCATTTCTGATCAGATAATTCAGATATTTA	379
ba4195	DEL	Chr5	31599136	31599470	CTTCCCGTGTCTTATTTTTAGCACGTGTCACATCGAATGTTTAGATACTAATTAGGAGTAGTAAACGTAGACTATTTACAAAACCAATTACATAAGTGGAATCTAAACGGCGAGACGAATCTATTAAGCCTAATTAATCCATCATTAGCAAATATTTACTGTAGCAACACATTGTCAAATCATGGACTAATTAGGTTTAATAGATTCGTCTCGTCGTTTAAATTCGTCTTATGTAATGGGTTTTGTAAATAGTCTACGTTTAATACTTCTAATTAGTATCTAAACATTCGATGTGACGGGTGCTAAAGTTTAGCATGTGGAAGAAAACAGGCCC	338
ba4199	DEL	Chr5	31757412	31757754	TTGAATTCCATCCTAATAATTATAATTTAGACACAAATTAATTAAGCTCATATAATTGTATGTGGAATATAGTTGTATATTATAGTTGGTGATATGGGAGAGATACTTATATGCTACACTTCTACTATAGAGAAGCGAGTCTAAGAGCATGCTATAAGAATTGAATTCCATTCTAATAACCATAATCTATAGAATCAATTTCCATCTCCCACCCCATGAATTTAAGATAGGCTTATATCTAAACTTTGGAAAGTTGTGGAATGCCACATTCCAACATAAATTAGCCTACTCCATTAAATAGATTCCAATTCCTTCAAAATGAAGGGACCCAAACGGGGCCTA	367
ba4202	DEL	Chr5	31803816	31804143	CCCCATGCTAAAGTTTAGCACATGTCACATCGGATGTTTGGATGCTAATTAGGAGTATTAAACATAGGTTAATTACAAAACTAAGTGCACAGATGGAGTCTAATTCGCGAGACGAAACTATTAAGCCTAATTAGTTCATGATTTGACAATGTAGTGCTACAGTAACCATTTGCTAATGATGGATTAATTAGACTTAATAGATTCGTCTCGCGAAATAGCATAGGGGTTCTGCAATTAGTTTTATAATTAGCTCATATTTAGTCCTCATAATTAGCATCCGAACATCCGACACTGCTAAAGTTTAGCACCTCGTATCCAAACACCCCC	349
ba4203	DEL	Chr5	31809422	31809780	TAAACTTTAGATGCTAAAAGTTGCTAAACTTTAGCAAAGCTGTTTGGATACTCTTGCTAAAAGGCATTTAATGAGCTGTAAAAGGACCTATCTACCCTTATTAAAGATGCGCAGGAGGAGGGCTGTTTGGATACTCTTGCTAAAAGGCATTTAATGAGCTGTAAAAGGACCTATCTACCCTTATTAAAGGTGCGCAGGAGGAGGGAGACAAGCAATAAATGAGGGGTATATATTGTCCAGCCCACCTTTTAGCAAGTTTTAGCAAGAGTGTTTTGCAGTTTAGTAGCTCAAAGTTGCTAAACTTTAGCATCTAAAGTTTAGCAAGGTGGAAGAAAACAGACCCTTATTTTGGCGATAT	367
pD8360	DEL	Chr5	31977902	31978115	TCTTCACTTGCAAGCCTTTGTGGCTTTCAGCATTGACCAACCAGTTGAATTGGTCAGCTTGTTTTACTATATATATTATAGTTATTACTATATATATTATCAATAGAAGCTTTGCCTCTACTAGTTATTACTATATATATTATAAATAACGTAAGTAAATGCAAGAGAAAAAAGAAAGGAAAAGAAAAGAAAAAAATAAATAAACCGAAAGCT	210
ba4214	DEL	Chr5	32242687	32243020	GTTTGGGAAACACCTGTTAAAGTTTAACACCTGTCACATCGGATGTTTGGATGCTAATTAGGAGTACTAAACATAAGCTAATTACAAAACTAATTGCACAGATGGAGTATAATTCGCGAGACGAATCTATTAAGCCTAATTAGTCCATGATTTGACAATGTGGTGCTACAGTAACCATTTGCTAATGATGGATTAATTAGGCTTAATAGATTCGTCTCGCGAATTAGCACAGGGTTCTGCAATTAGTTTTATAATTAGCTCATGTTTAATCCTCCTAATTAGCATCCGAACATCCGATGTGACACTGTTAAAGTTTAGCACCTCGTATCCAAA	347
ba4219	DEL	Chr5	32353576	32353895	AACCCTGTGACATCGAATGTTCGGATGTTAATTAAGAGGACTAAACATGAGTTAATTACAAAACTAATTGCAGAACCCCTAGGCTAAATCGCGAGATGAATCTATTAAGCCTAATTAATCCATCATTAGTGAATGGTTACTGTAGCACCACATTGTCAAATCATGAACTAATTAGGCTTAAAAGATTCGTCTCGTGATTTAGCCTAGGAGTTGTGCAATTAGTTTTGTAATTAAACTATATTTAATACTCCTAATTAGTGTCAAACATCTAATGTGACATGAGCTAAAATTTAACTTAGGGGAGCTAAACACCCCCTTA	335
ba4220	DEL	Chr5	32422567	32422914	TATGGGCTCCATGTCCCTGCATAACAATCCTAATGCTCTCAACTCTGAATAAGGGGCTGTTTGGGAAGCATAGGCTAAACTTTAGCCCCTGTCACATCGGATGTTTGGACACTAATTAGAAGTATTAAACATAGGCTAATTACATGTAGTCCATGATTTGACAATGTAGTGTTACAGTAACCATTCGCTAATGATGGATTAATTAGGCTTAATAGATTCGTCTCGCGATTTAGCCTAGGGGTTCTGCTATTAGTTTTATAATTAGCTCATGTTTAGTCCTCCTAATTAGCATCCGAACATCCGATGTGACAGGGCTAAACTTTAGCCCCTGCTATCCAAACACCCCC	299
ba4234	DEL	Chr5	32693989	32694126	GCTAGTGACACGCTAGGCAATTGCTCGTGGTTCAGTGCACAGTATCCAAAACAAAATTGTGGTCCACCAGATCGTGCTATGATCAATGAAATTATTCGGCATGCTTGCCGAACTACTGTTCGATGCCCTTACAGATA	123
ba4238	DEL	Chr5	32818282	32818605	ACTTTAACAGTGTCACATCGGATGTTTGGATGCTAATTAGGAGGACTAAACATGAGCTAATTATAAAACTAATTGCAGAACCTTGTGCTAATTCGCGAGACGAATCTATTAAGCCTAATTAATCCATCATTAGCAAATGGTTACTGTAGCACCACATTGTCAAATCATGGACTAATTAGGCTTAATAGATTCGTCTCGCGAATTATACTCCATCTGTGCAATTAGTTTTGTAATTAGCTTATGTTTAGTACTCCTAATTAGCATCCAAACATCCGATGTGACAGGTGTTAAACTTTAACAGGTGTTTCCCAAACACCCCCTTA	347
ba4239	DEL	Chr5	32956665	32956919	CCCAACTCCCAACTTTGACACTATGCAAAAAGAAGATTCCCCATCACATCAAACTTGCGGTACATGCATGGAGTACTAAATGTAGATGAAATTAAAAACTAATTGCACAGTTTTGTTGTACTTTGCGAGACGAATCTTTTGAGCCTAATTAGTCAATATTTGGACAATAATTCACAAATACAAACGAAACGCTACAGTGTGCTACAGTGCTGTAACAGTAATTTGGCACCTCCCAAATTCCCTAACTAAACAAG	276
ba4240	DEL	Chr5	32993582	32993932	ATGTAAGGGGGTGTTTGGGAAACACCTGTTAAAGTTTAACACCTGTCACATCGGATGTTTGGATGCTAATTAGGAGTAGTAAACATAAGCTAATTACAAAACTAATTGCACAGATGGAGTATAATTCGCGAGACGAATCTATTAAGCCTAATTAGTCCATGATTTGACAATGTGGTGCTACAGTAACCATTTGCTAATGATGGATTAATTAGGCTTAATAGATTCGTCTCGCGAATTAGCACAAGGTTCTGCAATTAGTTTTATAATTAGCTCATGTTTAGTCCTCCTAATTAGCATCCGAACATCCGATGTGACACTGTTAAAGTTTAGCACCTCGTATCCAAACAGCC	346
ba4241	DEL	Chr5	33011707	33012013	CAGCTACTGGTGTAGCTAGCCTCATTAAGGCCCTGTTTAGTTACTCCCAACTCCCAACTTTGACACTATGCAAAAAGAAGATTCCCCATCACATCAAACTTGCGGTACATGCATGGAGTACTAAATGTAGATGAAATTAAAAACTAATTGCACAGTTTTGTTGTACTTTGCGAGACGAATCTTTTGAGCCTAATTAGTCAATATTTGGACAATAATTCACAAATACAAACGAAACGCTACAGTGTGCTACAGTGCTGTAACAGTAATTTGGCACCTCCCAAATTCCCCAACTAAACAAGGCCTAAG	284
ba4242	DEL	Chr5	33037759	33038093	ATGATGGTCAGGTGTGAGAGTGAGACTAGCCGGACGAGTGCAGAATTTGATTCCCTTGAAATTAAGCACGCACGCGTGCATGTGTGGCGTGGCACACGTTCCCCATTTCCTACAGGGACGCCACGCCAGGGCCCCCCGTTTTTTCTACCGCACTGGGTTGCCTCATCAGATCAAAGTCGTCGTCGTCGTCGCTCTAGCTTAGCTACCTGGCCGTGTAACACGATTATTCTGATGGTACCGCCTTAACTAGACGTTAGGTGCTTAATTACAGCAGCGCTAACGTGCGCGGAGTGACCTGCGCGCTACGTGACAACTGACAAAGCAGAGGATCAGT	186
ba4243	DEL	Chr5	33200196	33200459	TTAGTTACTCCCAACTCCCAACTTTGACACTATGCAAAAAGAAGATTCCCCATCACATCAAACTTGCGGTACATGCATGGAGTACTAAATGTAGATGAAATTAAAAACTAATTGCACAGTTTTGTTGTACTTTGCGAGACGAATCTTTTGAGCCTAATTAGTCAATATTTGGACAATAATTCACAAATACAAACGAAACGCTACAGTGTGCTACAGTGCTGTAACAGTAATTTGGCACCTCCCAAATTCCCCAACTAAACAAG	276
ba4245	DEL	Chr5	33245889	33246109	TCCCCATCACATCAAACTTGCGGTACATGCATGGAGTACTAAATGTAGATGAAATTAAAAACTAATTGCACAGTTTTGTTGTACTTTGCGAGACGAATCTTTTGAGCCTAATTAGTCAATATTTGGACAATAATTCACAAATACAAACGAAACGCTACAGTGTGCTACAGTGCTGTAACAGTAATTTGGCACCTCCCAAATTCCCTAACTAAACAAGGCC	284
ba4248	DEL	Chr5	33384065	33384309	GTTTAATAACGCAGCTAGCAAGCGGGCTGCAAGGTTTCTCTCAGCCTTTTTCTAGCCCACTCGTACAATGGTTAGCTCTTCACCATTAATACATGGTCCACAAGTCATTCTCAGAGAGTTTCTTGGTTCCTGTACCTAAGTCGGCTGTAAGCTTATAGCCCGCTTCTCCTCTCTCACCTCTTCTCTCTCCTCCACGTCAGCATTCAGCTAGCTTACAGCCCCTTATTATACTTGCTCTAAGTAG	257
ba4254	DEL	Chr5	33596819	33597080	GGAGGAGGTCGTCGCCTAAGGGGCTGGTGAACTGCCGTGAGAAAACAGCAGTTGGGAGAGAAGGGGAGGAGGAAGACGGCGACCGGAGGAGGTCGTCGCCTAAGGGGCTGGTGAACTGCCGTGAGAAAACAGCAGTTGGGAGAGAAGGGGAGGAGGAAGACGGCGACCGGAGGAGGTCGTCGCCTAAGGGGTTGGTGAACTGCCGTGAGAAAACAGCAGTTGGGAGAGAAGGGGAGGAGGAAGACGGCGACCGGAGGAGGT	172
ba4259	DEL	Chr5	33695172	33695506	TACGAGATGCTAAACTTTAACAGTGTCACATCGGATGTTCGGATGCTAATTAGGAGAACTAAACATGAGCTAATTATAAAACTAATTGCAGAACCCTGTGCTAATTCGCGAGACGAATCTATTAAGCCTAATTAATCCATCATTAGCAAATGGTTACTGTAGCACCACATTGTCAAATCATGGACTAATTAGGCTTAATAGATTCGTCTCGCGAATTACACTCCATCTGTGCAATTAGTTTTGTAACTAGTCTATATTTAATGCTCCTAATTAGCATCCAAACATCCGATGTGACGGGTGTTAAACTTTAACACCATATAGCCAAACAGGCCCT	357
ba4264	DEL	Chr5	33802261	33802524	TCCCTCCAAACTCCCAACTTTGACACTATGCAAAAAGAAGATTCCCTATCACATCAAACTTGCGGTACATGCATGGAGTACTAAATATAGACGAAATTAAAAATTAATTGCACAGTTTTGTTGTACTTTGCGAGACGAATCTTTTGAGCCTAATTAGTCAATATTTGGACAATAATTCACAAATACAAACGAAACGCTACAGTATCGTATTTATGGCAAAATGCCAATTTTGCAACTCCCAACTTGGGAAATAAACAAGGTCT	283
ba4273	DEL	Chr5	33871824	33872178	TAGTCCCTAATCTTGGAGTGGCAAAATTGACATTTTACCATAAATGCACAAATGTAACATTTCGTTTGTATTTATGAATTATTATCAAAATATTGACTAATTAGACTCAAAAGATTCGTCTCATAAAGTACAACAAAACTGTGCAATTAGTTTTTAATTTCGTCTACATTTAATACCTCATGCATGTACCGCAAGTTTGATGTGATGAAAAATCTTCTTTTTGCATAGTGCCAAAGTTGAGAATTTGGAGGGAAGTAAACAACCTTCATCTCGTAGCTAGCCTCCTTTTGCCCAGTCTGCGCTGCTCGACCTAATAATGGTGAAAGGACTGAAAGCTTGACCTGACCTAGTCTG	256
pD8531	DEL	Chr5	33895656	33896015	ATTAGGGGGTGTTTGGCAGGGAGGGGCTAAATTTTAGCTCCTATCACATCGGATGTTTGACACTAATTAGGAGTATTAAACATAGTCTAATTATAAAACTAATTGCACAACCCCTAGGCTAAATCGCGAGATGAATCTATTAAACCTAATTAGTCCATGATTTGACAATGTAGTGCTATAGTAACCATTCGCTAATGATGGGTTAATTAGGCTTAATAGATTCGTCTCGTGATTTAGTCTAGGGGTTCTGCTATTAGTTTTATAATTAGCTCATATTTAGTTCTCCTAAATAGCATCCGTGTGAACGTGTGATGTGATAGGACTAAAGTTTAGCCCCTGACATCCAAACGCCCCCTTAG	354
ba4279	DEL	Chr5	33909571	33909921	CATGTTTTCTTCCACCTTGCTAAACTTTAGTTGCTAAAAGTTGCTAAACTTTAGTTGCTAAACTTTAACAAAGCTGTTTGGATACTCTTGCTAAAAGGCATTTAATGAGCTGTAAAAGGACCTATCTACCCTTATTAAAGGTGCGCAGGAGGGGGGAGACAAGCAATAAATGAGGGGTATATGTTGTCCAGCCCACCTTTTAGCAAGTTTTAGCAACCAAAAACTTGCTAAAGTGCTAAACTTTAGCAACTCAACTTTAGCAAGTTTTAGCAAGAGTGTTTTGCAGTTTAGCAGCTCAAAGTTGCTAAACTTTAGCATCTAAAGTTTAGCAAGGTGGAAGAAAATAGACC	357
ba4282	DEL	Chr5	33945059	33945461	CTCACTTCATTTAGGGCCTGTTTTCTTCCACTGACTAAACTTTAGCACCCGTCACATCGAATATTTAGATACTAATTAGAAGTATTAAACGTCGACTATTTACAAAACCCATTACATAAGACGAATCTAAACGGCGAGACGAATCTATTAAGCCTAATTAGTCCATGATTTGACAATGTGTTGCTACAGTAAATATTTGCTAATGATGGATTAATTAGACTTAATTAGGCTTAATAGATTCGTCTCGCCGTTTAGATTCCACTTATGTAATTGGTTTTGTAAATAATCTACGTTTACTACTCCTAATTAGTATCTAAACATTCGATGTGACACGTGCTAAAAATAAGACACGGGAAGAAAACACCCCCTTAATACCGGTAGTGGTCTTTGAACTTTTGT…	365
ba4286	DEL	Chr5	34007221	34007349	CATAGAAACGGGGCCTGTTCGCTTCAGCTTATAAGCCGGCTGAAAAGCTGAAACGGCTGATTTTTTGTGAGAGGAAAACACTGTTTGGTGGCTGATAAGCCGGCTGAATAAGCTGAAGCGAACAGGCC	126
ba4293	DEL	Chr5	34137710	34137993	AACAAAGAAAGGCCGGTGTTGTATTTAGGCTAGTTGCACAACTTTGGGGTGCCAAAATTACTGTAGCAACACTGTAGCGTTTCGTTTGTATTTGTGAATTATTGTCCAAATATTGACTAATTAGGCTCAAAAGATTCGTCTCGCAAAGTACAATAAAACTGTGCAATTAGTTTTTTATTTCGTCTACATTCATTACTCCATGCATGTACCGCAAGTTTGATATGATGGGGAATCTTCTTTTTGCATAGTGCCAAAATTGGGATTTTGGAGTGAAACATGGCCT	265
ba4307	DEL	Chr5	34691846	34692194	CCGTGTCTTATTTTTAGCACGTGTCACATCGAATGTTTAGATACTAATTAGGAGTAGTAAACGTAGACTATTTACAAAACCAATTACATAAGTGGAATCTAAACGGCGAGACGAATCTATTAAGCCTAATTAAGCCTAATTAATCCATCATTAGCAAATATTTACTGTAGCAATACATTGTCAAATCATGGACTAATTAGGCTTAATAGATTCGTCTCGCCGTTTAGATTCGTCTTATGTAATGGGTTTTGTAAATAGTCTACGTTTAATACTCCTAATTTAGTATCTAAACATTTCGATGTGACGGGTGCTAAAGTTTAGCAAGTGGAAGAAAACAGGCCCAAAATC	359
ba4309	DEL	Chr5	34938304	34938643	TTTAAGTACCCGTCACATCGAATGTTTAGATACTAATTAGGAGTATTAAACATAAACTAATTATAAAACTAATTGCACAGATGGAGGCTAATTTGCAAGACGAATCTATTAAGCCTAATTAGTCCATGATTTGACAATGTGTTGCTACAGTAAACATTTGCTAATGATGGATTAATTAGGCTTAATAGGTTCGTCTCGCTGTTTAGCCTCCACTTATGTAATGAGTTTTGTAAATAGCCTACGTTTAATACTCCTAATTAGTATCTAAACATTGATGTGACACTTACAAGCAAAGGAACCAAACGACCCCTCTATCTCATTTGCTGAGCGCGTCTACTC	337
ba4311	DEL	Chr5	34961184	34961354	GGCATCGATTCACCGATAATCGTGACTAATAACTGGACAACTTGCAAACAATGGATGTTTGACAAAAGATCTTGCTTGTAGCAACTATGGCCACCGATAATCGTGACTAATAACTGGACAACTTGCAAACAATGGATGTTTGACAAAAGATCTTGCTTGTAGCAACTATG	192
ba4312	DEL	Chr5	34972290	34972656	CCAGGCATGGGGAGCCGGTATGGAGGACCGGTTCAGGCTCACGGGAGGCAGGCTGAAATCATGCACCGAGCTTTGTTTGGTTGTCTTTATTGTTGGTCCAGTATGAGACGGAATCGTGTTTGGTTGCATGTATGGATAAGAGTTTTTGGTGTATGTCACATGGGCCCTGCGCGCTCACCTGCACCGTGCCATCCCGGCTCGCGAGGGAAGGTCATTTTTGGGCGGACGGAGGGATGCGGGATGGGAGGGGTGGAGTGAACGAGAGGGTGCAGCCATATGATGCGGGGAGAGCAACCAATCACGTCCAAGTGCACGAGATCATGCCGGATGGTCCTCTGGACGCCACCATCCCGGCTACCAATCACG	394
ba4314	DEL	Chr5	35018344	35018589	TGTTTAGTTGGCCAAATTGGGAGGTGAATTATTGTTCAAATATTGACTAATTAGGCTCAAAAGATTCGTCTCGCAAAGAACAACAAAACTGTGCAATTAGTTTTTAATTTCGTCTACATTTAGTACTCCATGCATGTACCGTAAGTTTGATGTGATAGGGATTCTTCTTTTTGCATAATGTCAAAGTTGGGAGTTGGGAGGTTTGCGGTCTTGCCCCTATGTCAGCGCCCAAATCACGCAACTCT	221
ba4315	DEL	Chr5	35072689	35073034	TTTGGAAGGAGGAGGCTAAACTTTAGCCCTGTCACATCGGATGTTCGGATACTAATTAAGAGGACTAAACATAAGCTAATTACAAAACTAATTGCAGAACCCCTAGGCTAAATCGCGAGACGAATCTATTGAGCCTAATTAATCCATCATTAGTGAATGGTTACTGTAGCACCACATTGTCAAATCATGCACTAATTAGGCTTAATAGATTCGTCTCGCGATTTAGCCTAGGGGTTGTGTAATTAGTTTTGTAATTAATCTAAGTTTAATACTCCTAATTAGTGTCCAAACATTCGATGTGACGGGGGCTAAAATTTAGCCCCCTCCTCCCAAACACCCGCTAAG	355
ba4318	DEL	Chr5	35425977	35426360	CAACACTAAAGGGGTGTTTGGATAGCAGGTGTTAAATTTTAGCACCTGTCACATCGGATGTTTGGACACTAATTAGGAGTATTAAACATAGTCTAATTACAAAACTAATTGCACAACCCCTAGGCTAAATCGCGAGACAAATCTATTAAGCCTAATTAATCCATCATTAGCGAATGGTTACTGTAGCACCACATGTCATCATGGACTAATTAGGCTTAATAGATTCGTCTCGCGATTTAGCCTAGGGGTTGTGCAATTAGTTTTGTAATTAGGCTATGTTTAATACTCCTAATTAGTGTCCAAACATCCGATGTGACATGTGCTAAAATTTAGCACATGCCTTCCAAACACCCCCTAAGAAATCAGAAATCCATAATCACTCG	355
ba4319	DEL	Chr5	35449533	35449867	GGGAAACCCCTGTTAAAGTTTAACACCTGTCACATCGGATGTTTGGATGCTAATTAGGAGTACTAAACATAAGCTAATTACAAAACTAATTGCACAGATGGAGTATAATTCGCGAGACGAATCTATTAAGCCTAATTAGTCCATGATTTGACAATGTGGTGCTACAGTAACCATTTGCTAATGATGGATTAATTAGGCTTAATAGATTCGTCTCGCGAATTAGCACAAGGTTCTGCAATTAGTTTTATAATTAGCTCATATTTAGTCCTCCTAATTAGCATCCGAACATCCGATGTGACACTGTTAAAGTTTAGCACCTCATATCCAAACAGCC	348
ba4331	DEL	Chr5	36302924	36303257	GCAACCAAGTGTTAAAATTTAACACCTGTCACATCGGATGTTTGGATGCTAATTAGGAGTATTAAATATAGGCTAATTACAAAACTAATTGCACAGATGAAGTGTAATTCACGAGACGAATCTATTAAGCCTAATTAGTCCATGATTTGACAATGTGGTGCTACAGTAACCAATTGCTAATGATGGATTAATTAGGCTTAATAGATTCGTCTCGCGGATTAGCACAGGGTTCTGCAATTAGTTTTATAATTAGCTCATATTTAGTTCTCCTAATTAGCATCCGAACATCCGATGTGACACTGTTAAAGTTTAACACCTCGTATCCAAACACCC	352
pD8630	DEL	Chr5	37388326	37388679	ATAAGGGGCTGTTTGGATATGAGGTGCTAAACTTTAACAGTGTCACATCGGATGTTCGGATGCTAATTAGGAGGACTAAATATGAGCTAATTATAAAACTAATTGCAGAACCTTGTGCTAATTCGCGAGACGAATCTATTAAGCCTAATTAATCCATCATTAGCAAATGGTTACTGTAGCACCACATTGTCAAATCATGGACTAATTAGGCTTAATAGATTCGTCTCGCGAATTATACTCCATCTGTGCAATTAGTTTTGTAATTAGCTTATGTTTAGTACTCCTAATTAGCATCCAAACATCCGATGTGACAGGTGTTAAACTTTAACAGGGGTTTCCCAAACACCCCCTAA	349
pD8640	DEL	Chr5	38633370	38633725	ACTTAGGGGCTGTTTGGATACGAGGTGCTAAACTTTAACAGTGTCACATCGGATGTTCGGATGCTAATTAGGAGGACTAAACATGAGCTAATTATAAAACTAATTGCAGAACCTTGTGCTAATTCGCGAGACGAATCTATTGAGCCTAATTAATCCATCATTAGCAAATGGTTACTGTAGCACCACATTGTCAAATCATGGACTAATTAGGCTTAATAGATTCGTCTCGCGAATTATACTCCATCTGTGCAATTAGTTTTGTAATTAGCTTATGTTTAGTACTCCTAATTAGCATCCAAACATTCGATGTGATAGGTGTTAAACTTTAACGGGTGTTTCCCAAACACCCCCTTAG	349
ba4354	DEL	Chr5	38649473	38649944	CCAGACATGGGGGCGTTTGGATGTCAGGGGCTAAACTTTAGCCCTGTCACATCACACGTTCAGATGCTAATTAGGAGGACTAAATATGAGCTAATTAAAAAACCAATAGCAGAACCCATAGGCTAAATCGCGAGACGAATCTATTAAGCCTAATTAATCCATCATAGCGAATGGGTTACTGTAGCACCACATTGTCAAATCATGGAACTAGATTAGGCTTAATAGATTCGTCTCGCGATTTAGCCCTAGGGGTTGTGCAATTAGTTTTGTAATTAGACTATGTTTAATACTCCTAATTAGTGTCCAAACATCCGATGTGACAGGGGCTAAAATTTAGCCCCTCCCTGCCAAACACCCCCATACACTAAGCGGCCTAGATTCCATGCAACTTGTGAGTAG…	360
ba4355	DEL	Chr5	38650564	38650978	TTGGTTATCCAACTTTGGGCAACCAAAATTACTGTAGCAACACTGTAGCATTTCGTTTATATTTGTGAATTATTGTCCAAATATTGACTAATTAGGCTCAAAAGATTCGTCTCGCAAAGTACAATAAAACTGTGCAATTAGTTTTTGATTTCGTCTACATTCAATACTCCATACATGTACCGCAAGTTTGATATGATGAGGAATCTTCTTTTTACGTAGTAAAATTGGGATTTTGGGGAACTCAATGAGCCTAATTAGTCAATATTTGGACAATAATTCACAAATACAAACGAAACGCTACAGTGTGCTACAGTGCTGTAACAGTAATTTGGCAAATTACTGTTACAGCACTGTAGCACACTGTAGCGTTTCGTTTGTATTTGTGAATTATTGTCCAAA…	339
ba4356	DEL	Chr5	38657988	38658339	CTAAAGTTTAGCACCTGTCACATCGGATGTTTGATACTAATTAGGAGTATTAAACATAGGCTAATTATAAAATTAATTGCACAGATGGAGTCTAATTCGCGAGACGAATCTATTAAGCCTAATTAGTCCATGATTTGACAATGTGGTGCTACAGTAACCATTTGCTAATGATGGATTAATTGGACTTAATAGATTCGTCTCGCGAATTAGCCCAGGGGTTCTACAATTAGTTTTATAATTAGCTCATGTTTAGTCCTCCTAATTAGCATCCGAACATCCGATATGACACCGTTAAAATTTAGCACATAGTATCCAAACACCACCTTAATCTCGTCTTTCTCACTGTAGCAT	346
ba4357	DEL	Chr5	38675685	38675852	AAGAGGAGGAAGGGAACCTTCTTTTAGTGGAAGGCATTGAGAGATTTAGGGCCTGTTCGCTTCAGCTTATTCAGCCGGCTTATCAGCCACCAAACAGTGTTTTCCTCTCACAACAAATCAGCCATTTCAGCTTTTTAGCCAGCTTATAAGCTGAAGCGAACAGGCCC	126
ba4358	DEL	Chr5	38689551	38689861	CTCATAAAACGGCTTCGGCTTCAGCTTCTTCGATGGAGTGGCTTTTTTAGTGAAGCTAAAGCCGTTTTGCAAAACGTTTGGTAAAACGGCTTCTCAATGGCAATATATGTAATTTTATGATCACTTAATGCTTGGAGAGAGAGGGGAAGCCGGTGAAGCCACTTTTTTCGGCTTCTCCTCTCTAGTGTAAGCCGTTTTGCGGCTTCTCCTTAGCTTTGGTGGTGAAGCCGTTTTGAAATTGACCCTTTGGTAGGGTTTCATCAAAAGCCGGTGGAGAAGCACTTTGAGAAGCCCTACCAAACGGGGCCGT	353
ba4361	DEL	Chr5	38756519	38756862	CGTTTGAAGGAATTGGAATCTACTTAATGGAGTAGGCTAATTTATCTTGGAACGTGGCATTCCACAACTTTCCAAAGTTTAGATATAAGCCTATCTTAAATTCATGGGGTGGGAGATGGAAATTGATTCTATAGATTATGATTATTAGAATGGAATTCAATTCTTATAGCACGCTCTTGAACTCGCTTCCCTATATAGAAGTGCAGCACATAAGTGTCTCTCCCATATCGCCAACAATGATATACAAATATATTCCACATACAATTATATTAGCTTAATTAATTTGTGTCTAAATTATGATTATTAGAATGGAATTCAATTCCAATAATCCAAACGGGACCTA	361
ba4365	DEL	Chr5	38856816	38857138	TTGGGAACACCCTGTTAAAGTTTAACACCTATCACATCGGATGTTTGGATGCTAATTAGGAGTATTAAACATAGGTTAATTACAAAACTAATTGCACAGATGGAGTATAATTCGCGAGACGAATCTATTAAGCCTAATTAGTCCATGATTTGACAATGTGGTGCTACAGTAACCATTTGCTAATGATGGATTAATTAGGCTTAATAGATTCGTCTCGCAAATTAGCACAGGGTTCTGCAATTAGTTTTATAATTAGCTCATGTTTAGTGCACCTAATTAGTATCCGAACATCCGATGTGACACTGTTAAAGTTTAACACCTC	347
ba4347	DEL	Chr5	38881700	38881996	TGTTTGGATGCTAATTAGGAGTACTAAACATAAGCTAATTACAAAACTAATTGCACAGATGGAGTATAATTCGCGAGACGAATCTATTAAGCCTAATTAGTCCATGATTTGACAATGTGGTGCTACAGTAACCATTTGCTAATGATGGATTAATTAGGCTTAATAGATTCGTCTCGCGAATTAGCACAAGGTTCTGCAATTAGTTTTATAATTAGCTCATGTTTAGTCCTCCTAATTAGCATCCAAACATCCGATGTGACACTGTTAAAGTTTAGCACCTCGTATCCAAACAGCCC	347
ba4372	DEL	Chr5	39496593	39496849	CCAATTTGGGAGGTGCCAAATTACTGTTACAGCACTGTAGCACACTGTAGCGTTTCGTTTGTATTTGTGAATTATTGTCCAAATATTGACTAATTAGGCTTAAAAGATTCGTCTCGTAAAGTACAACAAAACTGTGCAATTACTTTTTAATTTCATCTACATTTAGTACTCCATGCATGTACCGTAAGTTTGATGTGATGGGGAATCTTCTTTTTGCATAGTGTCAAAGTTGGAAGTTGGGAGTAACTAAACATGG	281
ba4374	DEL	Chr5	39544093	39544578	GAGGAAAGCTCGCATGCTTTTCGCTAGTCTACTGTTTATCCTTTTCTCTTTACTTTCATTGAGCAGTATAGCAAGGGTGCGTTTGGTTCCCTTTGCAAGTGTCACATCAATGTTTAGATAATAATTAGGAGTATTAAGGGGGTGTTTGGAAGGAGGAGGCTAAACTTTAGCCCTGTCACATCGGATGTTCGGATACTAATTAGGAGGACTAAACATAAGCTAATTACAAAACTAATTGCAGAACCCCTAGGCTAAATCGCGAGACGAATCTATTGAGCCTAATTAATCCATCATTAGTGAATGGTTACTGTAGCACCACATTGTCAAATCATGCACTAATTAGGCTTAATAGATTCGTCTCGCGATTTAGCCTAGGGGTTGTGTAATTAGTTTTGTAAT…	355
ba4378	DEL	Chr5	40142408	40142772	ATAAGGGGGTGTTTGGGAAACACCTGTTAAAATTTAACACCTGTCACATCGGATGTTTGGATGCTAATTAGGAGTAGTAAACATAAGCTAATTACAAAACTAATTGCACAGATGGAGTATAATTCGCGAGACGAATCTATTAAGCCTAATTAGTCCATGATTTGACAATGTGGTGCTACAGTAACCATTTGCTAATGATGGATTAATTAGGCTTAATAGATTCGTCTCGCGAATTAGCACAAGGTTCTGCAATTAGTTTTATAATTAGCTCATGTTTAGTCCTCCTAATTAGCATCCGAACATCCGATGTGACACTGTTAAAGTTTAGCACCTCGTATCCAAACAGCCCCTAATCCTCTCATGT	363
ba4381	DEL	Chr5	40273354	40273607	TTTGGGAGGTGCCAAATTACTGTTACAGCACTGTACCACACTGTAGCGTTTCGTTTGTATTTGTGAATTATTGTCCAAATATTGACTAATTAGGCTCAAAAGATTCGTCTCGCAAAGTACAACAAAACTGTGCAATTAGTTTTTAATTTCATCTACATTTAGTACTCCATGCATGTACCACAAGTTCGATGTGATGGGGAATCTTCTTTTTGCATAGTGTCAAAGTTGGGAGTTGGGAGTAACTAAACATGGC	283
ba4385	DEL	Chr5	40383168	40383500	TTATTTTTAGCACGTGTCACATCGAATGTTTAGATACTAATTAGGAGTAGTAAACGCAGACTATTTACAAAACCAATTACATAAGTGGAATCTAAACGGCGAGACGAATCTAGTAAGTCTAATTAAGCCTAATTAATCCATCATTAACAAATATTTACTGTAGCAACACATTGTCAAATCATGGACTAATTAGGCTTAATAGATTCGTCTCGCCGTTTAGATTCGTCTTATGTAATGGGTTTTGTAAATAGTCTACGTTTAATACTCCTAATTAGTATCTAAACATTCGATGTGACGGGTGCTAAAGTTTAGCAAGTGGAAGAAAACAGGCC	361
ba4386	DEL	Chr5	40420079	40420489	AGTAGAAACCACACCCTTCATGAAAACCTGTGCAAACCACGTAAAAAAGTCATATAAATTCACCAATAAAATCACACGTATAGATAATATGATGATGAACAATCTTGTAAAATATCTTGTCCAAACTCGACTTCGTTTGTGAGATATAAAAATAACAAATACCAAGGCTGAAAGTTGTCCAAATGATTTATTAGAATCTTTTATTTTTATATCTCACAAACGAAGTTGAGTTTGGACAAGATATTTTACAAGGATGTGTATCATCATATATCATCTACATGTGTGATTTTTTTTGTGAATTTAGACGAATTTTTATTTTGGTTTGCACAGGTTTTCATGAAGGGTGTGGTTTCTACTGGATATGTTCCCATCTAATTAATCCATCATTAGCAAATGGTT…	389
ba4387	DEL	Chr5	40551275	40551641	TGGTTCTATTCTAGTATATATAGGGCGTGTTTGGCAATCAAGTGTTAAAGTTTAACACCTGTCACATCGGATGTTTGGATGCTAATTAGGAGTATTAAACATAGGTTAATTACAAAACTAATTGCACAGATGGAGTGTAATTCACGAGACGAATCTATTAAGCCTAATTAGTCCATGATTTGACAATATGGTGCTACAGTAACCAATTGCTAATGATGGATTAATTAGGCTTAATAGATTCGTCTCGCGAATTAGCACAGGGTTCTGCAATTAGTTTTATAATTACCTCATGTTTAGTTCTCCTAATTAGCATCCGAACATCCGATGTGACACTGTTAAAGTTTAACACCTCGTATCCAAACACCC	347
ba4393	DEL	Chr5	40810128	40810464	ACCCTATTAAACTTTAACACCTGTCACATCGGATGTTTGGATGCTAATTAGGAGTACTAAATATAAGCTAATTACAAAACTAATTGTACAGATGGAGTATAATTCGCGAGACGAATCTATTAAGCCTAATTAGTCCATGATTTGACAATGTGGTGCTACAGTAACCATTTGCTAATGATGGATTAATTAGGCTTAATAGATTCATCTCGCGAATTAGTATAGGGGTTCTGCAGTTAGTTTTATAATTAGCTCATGTTTAGTCCTCCTAATTAGTATCCGAACATCCGATGTAACACTGTTAAAGTTTAACACCTTGTATCCAAACAGCCCCTAAGG	351
ba4394	DEL	Chr5	41034614	41034940	GTGTTAAAGTTTAACACCCGTCACATCGGATGTTTGGATGCTAATTAAGAGTATTAAACATAGGCTAATTATAAAACTAATTGCATAGACGGAGTGTAATTCGCGAGACGAATCTATTAAGCCTAATTAGTCCATGATTTGATAATGTGGTGCTACAGTAATCATTTGCTAATGATGGATTAATTAGGCTTAATAGATTCGTCTCGCGAATTAGCACAAGGTTCTGCAATTAGTTTTATAATTAGCTCATATTTAGTTCTTCTAATTAGCATCCGAACATCCGATGTGACACTGTTAAAGTTTAACACCTCGTATCCAAACACCCC	352
ba4395	DEL	Chr5	41042810	41043124	GCCCCCGTCACATCGAATGTTTGGACACTAATTAGGAGTATTAAACTTAGATTAATTACAAAACTAATTACACAACCCCTAGGCTAAATCGCGAGACGAATCTATTAAGCCTAATTAGTGCATGATTTGACAATGTGGTGCTACAGTAACCATTCACTAATGATGGATTAATTAGGCTCAATAGATTCGTCTCGCGATTTAGCCTAGGGGTTCTGCAATTAGTTTTGTAATTAGCTTATGTTTAGTCCTCTTAATTAGTATCCGAACATCCGATGTGACAGGGCTAAAGTTTAGCCTCCTCCTTCCAAACAGCA	330
ba4396	DEL	Chr5	41064041	41064414	GACGCCGTTTGTTTATCTCAGGGCCTGTTTTCTTCCACTTGCTAAACTTTAGCACCCGTCACATCAAATGTTTAGATACTAATTAGAAGTATTAAACGTAGACTATTTACAAAACCCATTACATAAGACGAATCTAAACGGCGAGACGAATCTATTAAGCCTAATTAGTCCATGATTTGCCCCTGCAACCGCGTCACACAAACATAAAAATGGAGGGTCATTAGGCTTAATTAGGCTTAATAGATTCGTCTCGCCGTTTAGATTCCACTTATGTAATTGGTTTTGTAAATAGTCTACGTTTACTACTCCTAATTAGTATCTAAACATTCGATGTGACACGTGCTAAAAATAAGACACGGGAAGAAAACGCCCC	362
pD8701	DEL	Chr5	41285188	41285536	AGGGGCTGTTTGGATACGAGGTGCTAAACTTTAACAGTGTCACATCGGATGTTTGGATGCTAATTAGGAGGACTAAACATGAGCTAATTATAAAACTAATTGCAGAACCTTGTGCTAATTCGCGAGACGAATCTATTAAGCCTAATTAATCCATCATTAGCAAATGGTTACTGTAGCACCACATTGTCAAATCATGGACTAATTAGGCTTAATAGATTCGTCTCGCGAATTATACTCCATCCGTGCAATTAGTTTTGTAATTAGCTTATGTTTAGTACTCCTAATTAGCATCCAAACATCCGATGTGATAGGTGTTAAACTTTAACAGGTGTTTCCCAAACACCCCCT	347
ba4400	DEL	Chr5	41301887	41302211	AACTTTAACAGTGTCACATCGGATGTTTGGATGCTAATTAGGAGGACTAAACATGTTGCTAATTATAAAACTAATTGCAGACCTTGTGCTAATTCGCGAGACGAATCTATTAAGCCTAATTAATCCATCATTAGCAAATGGTTACTGTAGCACCACATTGTCAAATCATGGACTAATTAGGCTTAATAGATTCGTCTCGCGAATTATACTCCATCTGTGCAATTAGTTTTGTAATTAGCTTATGTTTAGTACTCCTAATTAGCATCCAAACATCCGATGTGACAGGTGTTAAACTTTAACAGGTGTTTCCCAAACACCCCCTTA	351
ba4404	DEL	Chr5	41506626	41507006	GGGTGTTTGGATACGAGGTGTTAAACTTTAACAGTGTCACATCGGATGTTCGGATGCTAATTAGGAGAACTAAACATGAGCTAATTATAAAACTAATTGCAGAACCCTGTGCTAATTTGCGAGACGAATCTATTAAACCTAATTAATCCATCATTAGCAAATGGTTACTGTAGCACCACATTATCAAATCATGAACTAATTAGGTTTAATAGATTCGTCTCGCGAATTACACTCCATCTGTGCATTTAGTTTTGTAATTAACCTATGTTTAATACTTCTAATTAGCATCCAAACATCTGATGTGACAGGTGTTAAATTTTAACACCTTATTGCCAAACAGCCCTGCAGTTTCCTTTTGTAACTCGTCAGGGATGCAAAGG	344
ba4405	DEL	Chr5	41659423	41659697	ATGTTTAGTTACTCCCAACTTCCAACTTTGACACTATGCAAAAAGAAGATTCCCCATCACATCAAACTTGCGGTACATGCATGGAGTACTAAATGTAGATGAAATTAAAAACTAATTGCACAGTTTTGTTGTACTTTGCGAGACGAATCTTTTAAGCCTAATTAGTCAATATTTGGACAATAATTCACAAATACAAACGAAACGCTACAGTGTGCTACAGTGCTGTAACAGTAATTTGGCACCTCCCAAATTCCCCAACTAAACACGGCCTTGT	273
pD8710	DEL	Chr5	41890845	41891076	GTTTATTATCATATCATTTATACACATGTTGCCATTAAAAGCAATAAGAGTCTAAGAGGTTGTTTATTGTATCTCTTAGATGACATGATGGCTTAAGAGCTAGCAGCTGACTCAACCTTTGGAAGAGGCCTAAGTATCTGTTATTGTAATTCAAATTCTACAAGGACTCGATTCGCAAACCAGTTACAACCCAATCCTATCGTTCGGCTCGATTATAAAGGGTACAATAAA	230
ba4408	DEL	Chr5	41981013	41981414	CCTGCTAAAGTTTAGCACCTGTCACATCGGATGTTTGGATACTAATTAGGAGTATTAAACATAGGCTAATTACAAAACTAATTGCACAGATGGAGTCTAATTCGCGAGACGAATCTATTAAGCCTAATTAGTCCATGATTTGACAATGTGGTGCTACAGTAACCATTTGCTAATGATGGATTAATTAGGCTTAATAGATTCGTCTCGCGAATTAGCTCGGGGTTCTGCAATTAGTTTTACAATTAGCTCATGTTTAGTCCTCCTAATTAGCATCCGAACATCCGATGTGACACTGCTAAAGTTTAGCACCTAGTATCCAAACACCCACTTAGACAATTCCATGTGTTGATGGAAGGACGCAACAACACGAGTGAACACAGCAGGTGGGTCAGGAAATAA…	368
ba4410	DEL	Chr5	42007139	42007411	ACTCCCAACTTTGACACTATGCAAAAAGAAGATTCTCCATCACATCAAACTTGCGGTACATGCATGGAGTACTAAATGTAGATGAAATTAAAAACTAATTGCACAGTTTTGTTGTATTTTGCGAGACGAATCTTTTGAGCCTAATTAGTCAATATTTGGACAATAATTCACAAATACAAACGAAACGCTACAGTGTGCTACAGTGCTGTAACAGTAATTTGGCACCTCCCAAATTCCCCAACTAAACAAGGCCTAAGTATTCCTAGCAAGTA	288
ba4411	DEL	Chr5	42023320	42023506	TGACAAATGACATAGGACTAAGGGCCTGTTTTCTTCCACTTGCTAAACTTTAGCACCCGTCACATCGAATGTTTAGATTCCACTTATGTAATTGGTTTTGTAAATAGTCTACGTTTACTACTCCTAATTAGTATCTAAACATTCGATGTGACACGTGCTAAAAATAAGACACGGGAAGAAAACGCC	172
ba4419	DEL	Chr5	42078091	42078430	TTGGGAGGAGGGGGCTAAATTTTAGCCCCCGTCACATCAAATGTTTGGACACTAATTAGGAGTATTAAACCTAGACTAATTACAAAACTAATTACACAACCCCTAGGCTAAATCACAAGATGAATCTATTAAGCCTAATTAGTCCATGATTTGACAATGTGGTGCTACAGTAACCATTCACTAATGATGGATTAATTAGGCTTAATAGATTCGTCTCGCGATTTAGCCTAGGGGTTCTGCAATTAGTTTTATAATTAACTTATATTTAGTTCTTCTAATTAGTATCCGAACATCCGATGTGATAGGGCTAAAGTTTAGCCTCCTCCTCCCAAACACCCC	351
pD8721	DEL	Chr5	42098844	42099197	TTATGGGGGTGTTTGGGAAACACCTGTTAAAGTTTAATACCTGTCACATCGGATGTTTGGATGTTAATTAGGAGTACTAAACATAAGCTAATTACAAAACTAATTGCACAGATGGAGTATAATTCGCGAGACGAATCTATTAAGCCTAATTAGTCCATGATTTGACAATGTGGTGCTACAGTAACCATTTGCTAATGATGGATTAATTAGGCTTAATAGATTCGTCTCGCGAATTAGCACAGGGTTCTGCAATTAGTTTTATAATTAGCTCATGTTTAATCCTCCTAATTAGCATCCGAACATCCGATGTGACACTGTTAAAGTTTAGCACCTCGTATCCAAACAGCCCCTAT	349
ba4425	DEL	Chr5	42603756	42604188	AAAGGATTTGCTTGAATGGATGGGAATACTATCTCAACTGTGCAGAACAAGGCATAGAGCCCGTTTTCTTCCACTTGCTAAACTTTAGCACCCGTCACATCGAATGTTTAGATACTAATTAGGAGTATTAAACGTAGACTATTTACAAAACCCATTACATAAGACGAATCTAAACGGCGAGACGAATCTATTAAGCCTAATTAGTCCATGATTTGACGATCTGTTGCAACGCAAATTCTGGCTAGGGATGATTGGATTAGGCTTAATAGATTCGTCTCGCCGTTTAAATTCCACTTATGTAATGGGTTTTGTAAATAGTCTACGTTTACTACTCCTAATTAGTATCTAAACATTCGATGTGACACGTGCTAAAAATAAGACACGGGAAGAAAACGCCCC…	350
ba4426	DEL	Chr5	42813096	42813434	GTTTGGATACAAGGTGCTAAACTTTAACAGTGTCACATCGGATGTTCGGATGCTAATTAAATGGTCTAAACATGAGCTAATTATAAAACTAATTGCAGAACCCTATGCTAATTGGTGAGATGAATCTATTAAGCCTAATTAATCCATCATTAGCAAATGGTTACTGTAGCACCACATTGTCAAATCATGGACTAATTAGACTTAATAGATTCATCTCGCAAATTATACTCCATCTGTGCAATTAGTTTTATAATTAGCCTATGTTTAATACTCCTAAGTAGCATCCAAACATCCGATGTGACAGGTGTTAAACTTTAACACGGTGTTCCCAAACACCC	349
ba4427	DEL	Chr5	42864013	42864355	GGGTGTTTGGATACGAGGTGCTAAACTTTAACAGTGTCACATCGGATATTCGGATGATAATTAGAAGAACTAAACATAAGCTAATTATAAAATTAATTGCAGAACCCTGTGCTAATTCGCGAGACGATTCCATTAAGCCTAATTAATCCAACATTAGCAAATGGTTACTGTAGCACCACATTGTCAAATCATGGACTAATTAGGCTTAATAGATTCGTTTCGCGAATTACACTCCAACTGTGCAATTAGTTTTGTAATTAGTCTATATTTAATACTTCTAATTAGCATCCAAACATCCGATGTGACGGGTGTTAAACTTTAACACGTTGGAGCCAAACAGAC	360
ba4428	DEL	Chr5	42957103	42957450	AGGGGGTGTTTGGGAAACCCCTGTTAAAGTTTAACACCTGTCACATCGGATGTTTGGATGCTAATTAGGAGTACTAAACATAAGCTAATTACAAAACTAATTGCACAGATGGAGTATAATTCGCGAGACGAATCTATTAAGCCTAATTAGTCCATGATTTGACAATGTGGTGCTACAGTAACCATTTGCTAATGATGGATTAATTAGGCTTAATAGATTCGTCTCGCGAATTAGCACAAGGTTCTGCAATTAGTTTTATAATTAGCTTATGTTTAGTCCTCTTAATTAGCATCCGAACATCCGATGTGACACTGTTAAAGTTTAGCACCTCGTATCCAAACAGCCCC	348
ba4443	DEL	Chr5	43628001	43628496	AAATATTCCCTCCGCTCTAAATTATTATTCGTTTTAGTTTTTTAGGTGCATACACCTAGATATATACTAGGTCTAGATCCATAGCAAAAGTTATACATTTAGAAAAATCAAAACAAATAGTAATTTGAGACCAATGAGGTATTACACCACTAAAATTCTTATTGAAAAAAAGGCTAGAGCTAGCTGCGTGCAGTGGATAAGAATTACACCATAGATTCTTGTGGAATCTCAGTGCCTTGAGGTATTACACCACTAAAATTCTTATTGAAAAAAAGGCTAGAGCTAGCTGCGTGCAGTGGATAAGAATTACACCATAGATTCTTGTGGAATCTCAGTGCCTTGAGGAATCCTCCTATATACAAGCCCGTCTGCGGTGATCTCAAATACAAACCACATCAT…	112
ba4437	DEL	Chr5	44035337	44035714	AGGCAAGGAATCCCTTCTTCAGAGTTGGTTATAACAGTTTGGGTGGCTTTGCAACTATCAACCACCTTCACTTCCAGGTTAGTCTTTAGAATCGTATAGTTGTCAATTGCACTAAGGCAACTGTCCCTTTTTCACAGTACCTCTCAGCAAGTCCTGTACTGACATTTTGTTCATTAGGCATACTACCTGAAAGTACAGTATCCAGTTGAAAAGGCAACCACAGAGAAGCTCACAACCCTAGTCAATGGTGTGAGCATTGCCCAGCTGGTGGGTTATCCAGTAAGTGGTTTTGTGTTCGAAGGTGGGGCGAGCCTTGAGGATTTGTCATGTATGGTTTCGAAAGTCTGCATCTTCTTGCAAGAGAACAACAGACCTTT	316
ba4453	DEL	Chr5	44273704	44274270	TCGGTCAGCAGGGCGCGGCGGCGGAGGAGGAACACCTGACGGCGGCACCTGATGAGGACTTCATTCCCTTGTGTCCCGCCGCCGGCGAGTACTGCTGCACGGTGTACGGGCAGCGGGGTGTGATGCCAGACGAGGAGGAGGAGGACGACGAGCAGCTCGCATCGCGACAGGAGGAATACTTCATCCCCATAGACCCGGCTGCGGCCGAGGAAGACGACTTCATCCCCCTGGACCCAACAAGCGACGACGACGAGGATGGCGAGCAGCTCGCATCGCAACAGGAAGAGGACTTCAGCCCCATAGACCCGGCGGCCGAGGAAGACGACTTCATTCCCCTGGATCCAACAAGCGACGACGACAGGCAGCTCGCATCAGGACAGGAAGACTTCATTCCCGTGG…	122
ba4454	DEL	Chr5	44289346	44289660	GTTCAGTGCTCACTCCTTAGAGCAACTCCAAGAGGTTGCTAATCTTACCCCAATACTTTTTTTTGGAAAAAAAAAAGAAAAAACGAACTCCAACAGTCCACCCAAACCTTCCCTAATTTTTTAGCAACGCTAAAAAACAGTCCAATACTGATTCCCGCACGCTCGCGCGTCTGCCGTGGCCTGTTTTAAAATATTGGGGGCTATTTATTAGCGATCTGCCGTGAATTGATATGTTTTTAGAGGAAAATTTTTTTGGGGAAAATTTTTTTTAGAGTACTCTTGGAGTTGCTCTTAGGGCTGAGGCCCCTAGTTCC	282
ba4457	DEL	Chr5	44438367	44438616	GGAGGTGCCAAATTACTGTTACAGCACTGTAGCACACTGTAGCGTTTCGTTTGTATTTGTGAATTATTGTCCAAATATTGACTAATTAGGCTCAAAAGATTCGTCTCGCAAAGTACAACAAAACTGTGCAATTAGTTTTTAATTTCATCTACATTTAGTACTCCATGCATGTACCGCAAGTTTGATGTGATGGGGAATCTTCTTTTTGCATAGTGTCAAAGTTGGGAGTTGGGAGTAACTAAACATGGC	280
ba4464	DEL	Chr5	45005291	45005618	GTGTTAAAATTTAACACCTGTCACATCGGATGTTTGGATGCTAATTAGGAGTATTAAATATAGGCTAATTACAAAACTAATTGCACAGATGAAGTGTAATTCACGAGACGAATCTATTAAGCCTAATTAGTCCATGATTTGACAATGTGGTGCTACAGTAACCAATTGCTAATGATGGATTAATTAGGCTTAATAGATTCGTCTCGCGGATTAGCACAGGGTTCTGCAATTAGTTTTATAATTAGCTCATATTTAGTTCTCCTAATTAGCATCCGAACATCCGATGTGACACTGTTAAAGTTTAACACCTCGTATCCAAACACCCCC	348
ba4467	DEL	Chr5	45110962	45111216	TCCCAACTCCCAACTTTGACACTATGCAAAAAGAAGATTCCCCATCACATCAAACTTGCGGTACATGCATGGAGTACTAAATGTAGATGAAATTAAAAACTAATTGCACAGTTTTGTTGTACTTTGCGAGACGAATCTTTTGAGCCTAATTAGTCAATATTTGGACAATAATTCACAAATACAAACGAAACGCTACAGTGTGCTACAGTGCTGTAACAGTAATTTAGCACCCCCAAATTCGCCAAACTAAACAC	276
ba4468	DEL	Chr5	45135429	45135759	GGGGCTAAATTTTAGCCCCTGTCACATCGGATGTTTGGACACTAATTAGGAGTATTAAACATAGTCTAATTACAAAACTAATTGCACAACCCCTAGGCTAAATCGCGAGACGAATCTATTAAGCCTAATTAGTCCATGATTTGACAATGTGGTGCTACAGTAACCATTCGCTAATGATGGATTAATTAGGCTTAATAGATTCGTCTCGCGATTTAGCCTATGGGTTCTGCTATTGGTTTTTTAATTAGCTCATATTTAGTCCTCCTAATTAGCATCTGAACGTGTGATGTGACAGGGCTAAAGTTTAGCCCCTGACATCCAAACGCCCCC	358
ba4470	DEL	Chr5	45297894	45298254	TTTTAGCCCCTGTCACATCGGATGTTTGGACACTAATTAGGAGTATTAAACATAGTCTAATTACAAAACTAATTGCACAACCCCTAGGCTAAATCGCGAGACGAATCTATTAAGCCTAATTAGTCCATGATTTGACGATGTGGTGCTACAGTAACCATTCGCCTAATGATGGATTAATTAGGCTTAATAGATTCGTCTCGCGATTTAGCCTATGGGTTCTGCTATTGGTTTTTTAATTAGCTCATATTTAGTCCTCCTAATTAGCATCTGAACGTGTGATGTGACAGGGCTAAAGTTTAGCCCCTGACATCCAAACGCCCCCTAGTGACATCTTTTTTCCTTTTCCTTTTCCTTTTGCTC	299
ba4476	DEL	Chr5	45462327	45462580	TTCCAACTTTGACACTATGCAAAAAGAAGATTCCCCATCACATCAAACTTGCGGTACATGCATGGAGTACTAAATGTAGATGAAATTAAAAACTAATTGCACAGTTTTGTTGTACTTTGCGAGACGAATCTTTTGAGCCTAATTAGTCAATATTTGGATAATAATTCACAAATACAAACGAAACGCTACAGTGTGCTACAGTGCTGTAACAGTAATTTGGCACCTCCCAAATTCCCCAACTAAACAAGGCCTT	270
ba4477	DEL	Chr5	45515387	45515653	GTTTAGTTGGCGAATTTGGGAGGTGCCAAATTACTGTTACAGCACTGTAGCACACTGTAGCGTTTCGTTTGTATTTGTGAATTATTGTCCAAATATTGACTAATTAGGCTCAAAAGATTCGTCTCGCAAAGTACAACAAAACTGTGCAATTACTTTTTAATTTCATCTACATTTAGTACTCCATGCATGTACCGCAAGTTTGATGTGATGGGGAATCTTCTTTTTGCATAGTGTCAAAGTTGGAAGTTGGGAGTAACTAAACATGG	278
ba4485	DEL	Chr5	46044730	46045115	TGCAACTTGTGTTCCCTCGGTAACTAGACTTGGATAACTGTAAGAACATTATGCCATCATTTGGTTTAATCTTTCAATGCATGATGTATACTAAGCAAGAAAAGAAACTAGCTTGTTATATAAAACTGCTATGATTCAACGGGCCAAATTGAGTTTATGTTTTGGCTTAATTATGCACTTTAACTTTTAAGTATGTGTAAATAAGAAATGCCTAGCTACAATTATCCTGTTGAATCCAATGTATATTGCAACATAAATGTTTTGTTACCCGTAGCAACGCACGGGCACGATCCTAGTTACTATTTTAAAGATAAGACATGTAGTCAGATGTTATACTTCTCAACCGGATCAAGCTTTTTTATTAGTGCGTACTGGCCATGCCCTA	309
ba4487	DEL	Chr5	46065739	46066256	AATTTCAGTTCAGGTCTGGGGTGCTAACGGATTGGACCCCTGGTTTGTACCCTAGTGGAGTTATTTCTGTCTGTTGCTGAGTGCTGATTCTTCTCTTGTCAGAGCAGTAGCTGCAAGCTGGATCGTCATCCGGGTCAGAGCCGTGAAACCAGAGATCATTTTCACACGCTTCTTCTTGAATCTTCACATGAGGCCATATTTGCATGGGCCAAACTGAGGCACAATGGGCCTGTTCGCTTCAGCTTATAAGCCGGCTGAAAAGTCGAAACGGCTGATTTATTGTGAGAGAAAAACACTGTTTGGTGGCTAATAAGGCGGCTGAATAAGCTGAAGTGAACAGAACCCAATGTGTGTAGGTGCGTTTGGAGGTTATGGCGCCACCAAATGAACTGCCAGTAA…	152
ba4494	DEL	Chr5	46235646	46235889	CAACTTTGGGGTGTCAAAATTCCTGTAGCAATACTGTAGCGTTTCGTTTGTATTTGTGAATTATTGTCCAAATATTGACTAATTAGGCTTAAAAGATTCGTCTCGCAAAGTACAACAAAACTGTGCAATTAGTTTTTGATTTCATCTACATTCAGTACTCCATGCATGTACCGCAAGTTTGATGTGATGGGGAATCTTCTTTTTGCATAGTGTCAAAGTTGGGATTTTGGAGTGAACTAAACA	271
ba4495	DEL	Chr5	46236208	46236576	CATCTCGTTTGGCTGACTAACAGTCCGGAGGGCCTGCCAGGTCCTACGAATCTGCAACAGGGGACTTGCATTTTGGCCGTAGGAAATTGCACACCCATTGCATGGTGGGGCCGTTGATGCAGTATTTTAGGCCTTGTTTAGTTGGTCAAATTGGGAGGTGCCAAATTACTGTGCTGGCACTGTAGCACACTGTAGCGTTTCGTTTGTATTTGTAAATTATTGTCCAAACATTGACTAATTAGGCTTAAAAGATTCGTCTCGTAAAGTACAACAAAATTGTGCAATTAGTTTTTAATTTCATCTACATTTAATACTCCATGCATGTACCGCAAGTTTGATTGATGGAGAATCTTCTTTTTGCATACTGT	280
ba4512	DEL	Chr5	46316167	46316493	ATGTTAAACTTTAACAGTGTCACATCGGATGTTCGGATGCTAATTAGGAGAACTAAACATGAGCTAATTATAAAACTAATTGCAGAACCCTGTGCTAATTCGCGAGACGAATCTATTAAGCCTAATTAATCCATCATTAGCAATTGGTTACTGTAGCACCACATTGTCAAATCATGGACTAATTAGGTTTAATAGATTCGTCTCGTGAATTATACTCCATCTGTGCAATTAGTTTTGTAATTAGCCTATGTTTAATACTCCTAATTAGCATCCAAACATCCGATGTGACAGGTGTTAAACTTTAACACATGGTTGCCAAACAGGCC	349
ba4520	DEL	Chr5	46799023	46799530	TCGCTTTCGGGGCTGTTTGGATACGAGGTGCTAAACTTTAACAGTGTCACATCGGATGTTTGGATGCTAATTAGAAGGATTAAACATGAGCTAATTATAAAACTAATTGCAGAACCCTGTGCTAGTTCGCGAGACAAATCTATTAAGCCTAATTAATCCATCATTAGCAAATGGTTATTGTAGCACCACATTGTCAAATCATGGAGTAATTAGACTTAATAGATTCATCTCGCGAATTAGACTCCATCTGTGCAATTAGTTTTGTAATTAGCCTATGTTTAATACTCCTAATTAGCATCCAAACATCTGATATGACAGGTGCAAACTTTAATAGGGGTATCAAAACACCCCCTTACTCCATCGCTGCAAAAGTGTGGCTTTCAATCCCAACCTTATCTA…	359
ba4524	DEL	Chr5	46906133	46906492	GATTCCTATATATAGAGGTTGTTTGGATACGAGGTGTTAAACTTTAACAGTGTCACATCAGATGTTCGGATGCTAATTAGGAGAACTAAACATGAGCTAATTATAAAACTAATTGCAGAACCCTATGTTAATTCGCGAGACGAATCTATTAAGCCTAATTAATCCATCATTAGCAAATGGTTACTGTAGCACCACATTGTCAAATCATGGACTAATTAGGCTTAATAGATTCGTCTCGCGAATTATACTCCATCTGTGCAATTAGTTTTGTAATTAGTCTATGTTTAATACTTCTAATTAGCATCCAAACATCCGATGTGACGGATGTTAAACTTTAACAGCTGGTTGCCAAACAGGCC	371
ba4525	DEL	Chr5	46921781	46922154	GCATGCGTCCACACCATCTATTTAGGGCCTGTTTGGCTCCATGGTGTTAAAGTTTAACACCCGTCACATCGAATGTTTGGATGCTAATTAGGAGTATTAAACATAGACTAATTACAAAACTAATTGCACAGATGGAGTGTAATTCGTGAGACGAATCTATTAAGCCTAATTAGTCCATGATTTGACAATGTGGTGCTACAGTAACCATTTGCTAATGATGGATTAATTAGGCTTAATAGATTCGTCACGCGAATTAGCACAGGGTTCTGCAATTAGTTTTATAATTAGCTCATGTTTAGTTCTCCTAATTAGCATCCGAACATCCGATGTGACACTGTTAAAGTTTAGCACCTCGTATCCAAACACCCCCTTA	355
ba4526	DEL	Chr5	47042879	47043204	GTGCTAAACTTTAACATTGTCACATCGGATGTTCGGATGCTAATTAGAAGGACTAAACATGAGCTAATTATAAAACTAATTGCAGAACCCTGTGCTAATTCGCGAGATGAATCTATTAAGCTTAATTAATCCATCATTAGCAAATGGTTACTGTAGCACCACATTGTCAAATCATGGACTAATTAGGCTTAATAGATTCGTCTCATGAATTATACTCCATTTGTGCAATTAGTTTTATAATTAGCCTATGTTTAATACTCCTAATTAGCATCCAAACATCCGATGTGACAGGTGTTAAACTTTAACAGGGTGTTCCCAAACACCC	351
ba4528	DEL	Chr5	47127770	47128118	CTGAGGGGGTGTTTGGGAAACCCCTGTTAAAGTTTAACACCTGTCACATCGGATGTTTGGATGCTAATTAGGAGTACTAAACATAAGCTAATTACAAAACTAATTGCACAGATGGAGTATAATTCGCGAGACGAATCTATTAAGCCTAATTAGTCCATGATTTGACAATGTGGTGCTACAGTAACCATTTGCTAATGATGGATTAATTAGGCTTAATAGATTCGTCTCGCGAATTAGCACAAGGTTCTGCAATTAGTTTTATAATTAGCTCATATTTAGTCCTCCTAATTAGCATCCGAACATCCGATGTGACACTGTTAAAGTTTAGCACCTCATATCCAAACAGCC	347
ba4530	DEL	Chr5	47153149	47153298	GCAGGCATCTCGAACTCGATCGATCCGGGGTCTGTTCGCTTCAGCTTATTGAGCCGGCTTATCAGCCACCAAACAGTATTTTCCTCTCACAACAAATCAGCCGTTTCAGCTTTTCAGCCGGCTTATAAGCTGAAGCGAACAGGCCGCCG	119
ba4531	DEL	Chr5	47225471	47226034	TCTCTAAAGAACGAAACACAGCAGGAATTTTATCCGCTCGTTCATCATGGGGTACAGACGGAGGGATGAAATCGCCACCCTGCTCGATCGCATCCGGCGAGCCCGCCGCCTCTCCGCGATTGGCAGCGCGCGCGACTATTCTTCTTACCTGCCGTGTATATATGCAGCCATCCTCGCACCACCCACGCCTCCAAGAAGACTAGAAGAGCCCGTGCTGTTGCTGCGCCGAGGAGCCCCAAGAGTCCAACGGCCTGTTCGCTTCAGCTTATTCAGCCGGTTTATCAGCCACCGAACAGTATTTTTCTCTCATAACAAATCAGCCGTTTCAGCTTTTCAGCCGGCTTATAAGCTGAAGCGAACAGACCCCAAGACAATGGCAGCCATGGCGCGCTGGTGGGA…	134
pD8896	DEL	Chr5	47228549	47228802	ATCTTAGAGCAAGTTTAATAACGCAGCTAGCAAGCGGGCTGCAAGGTTTCTCCCAGCCTTTTTCTAGCCCACTCGTACAATGGTTAGCTCTTCACCATTAATACATGGTCCACAAGTCATTCTCACAAAGTTTCTTGGTTCCTGTGTCCAAATCGGCTGTAAGCTTATAGCCCGCTTCTCCTCTCTCACCTCTTCTCTCTCCTCCACGTCAGCATTCAGCCAGCTTACAGCCCCTTATTATACTTGCTCTTAG	246
ba4549	DEL	Chr6	234045	234327	GGTAATGTAAACGCAAAGGGAATCAAATTACAGTGTATTTAGAGGTGGAATAGGTGATTGCCTTCTTTGTTTGGTTGCACTCTGGTAACGTAATCAGATTACTGTGTGGGTGCTATATCTGATTACGGTGAGGGAGGAGGGGTAACAAGCTTGTATAGATATTATTTAGGTAAGGGATTCGATTACAGTGTCAATTGATTACAAACCACCGCAACCAAACATATGTAATGGGATTCGTTACCTTCAGTAATCAGATTACGTTACATTTGAGCCAACCAAACA	313
ba4550	DEL	Chr6	249813	249936	CCACCTGGTACGTCACTGGATGCTCTCTTCACAGTAGTTTCGATCTGCGAGCAGCAACCGTTCCTGCAAAGTTTTCTTTAGCTACTGCTGATGCAGCATATTATAAAACATATATTTATAATT	122
ba4551	DEL	Chr6	285209	285373	TACAAAATAATGTATTTTGAAAAAAATTTGCTAGAACCATCCGAAACCTTGATATTTGACGATAGAATGGATGTGACTTGCGGGGCTGTAGCCTTGTGATTCTTTTTTTTTCCCACGAGACAGTTTGTCTTGATATAAATTTGATTAACTTTAGCATCCTTGTA	146
ba4557	DEL	Chr6	304343	304810	TCGCAGGGACAACATGGTAGGTGGGTGCGTGCGGCACAAGGCTATGGATTACTCGCGACCGAGAGAGAGTTATGATGAGGGTCGCACGTATATGTGGCTATGGTCACAATACGAAAGAAGAAAACGAGTGAGAAAAGGAAAAAATATGTGGAGCGATTGGTGATGAATAATGTGATAGTAGAAGGTGGTCTTAATAGGCAGATTGTTGTAGTCCTTGCGGCTGAGTATGTTAAAAGGGCTAGAACAAAAGCCTTATTCTGATTTTCTTTAGTGTAGGCAACAATAACCAAAAAGCTAGTCCCCCTTAGGGTGTTGTTGAGGTGCCTTCTGCATGGTTGAACTATCCGGTAAGAATCTTATCCATGAGTTATCTAGGTGAGCAACAACAGCACCTTGCAT…	342
ba4560	DEL	Chr6	366287	366764	AACAGGAAAAGAATAATTGAAGGAAGCAAGAAAGAGGGTTCCATTTTGATCAGGTGTATTTTCTAGGACCAGGAATTCATCAGGAAAGCGTGTTAGGTGAGGCTTTGGGTTGGTTCCCGTACCGTGAAAGCAGTAGCAATGAACGAGGAGGCATCAGGCATGGAACACACAAGCTGTAACCTGGGATCTGTTCGCTTCAGCTTATAAGCCGGCTGAAAAGTCGAAACGGCTGATTTGTTGTGAGAAGAAAACACTGTTTGGTGGCTGATAAGCCGGCTGAATAAGCTGAAGCGCACAGGCCCCAGGTTGCTGGAAGCAACAGCAGCAATGCAAGATGGGTGAAGGAATTGGGGGTTGGGTCGGGTCGGTGCCATGAGCCAAACCGAGTAACCAACCACC…	108
ba4564	DEL	Chr6	421222	421596	TGTCGACCACCATCATCATCGTCCTGCTAAGGGGGTGTTTGGATACGAGGTGTTAAACTTTAACAGTGTCACATCGGATGTTCGGATGCTAATTAGGAGAACTAAACATGAGGTAATTATAAAACTAATTGCAGAACCCTGTGCTAATTCGCGAGACGAATCTATTAAGCCTAATTAATCCATCATTAGCAATTGGTTACTGTAGCACCATATTGTCAAATCATGGACTAATTAGGCTTAATAGATTCGTCTCGTGAATTACACTCCATCTGTGCAATTAGTTTTGTAATTAACCTATGTTTAATACTCCTAATTAGCATCCAAACATCCGATGTGACAGGTGTTAAACTTTAACACTTGATTGCCAAACACGC	351
ba4543	DEL	Chr6	531429	531546	AATAGGTATGCTAGGAAACATATTTCATAAAGAATCTAATAAAACTGGCTAGACATCAAAAGCTAGCATCGATATATTTTTATATAAACTTGGTCAAACATAAAATAGTTTGAGTTA	114
ba4583	DEL	Chr6	949643	949883	ACTCCCAACTTTGGCACTATGCAAAAAGAAGATTCCCCATCACATCAAACTTGCGGTACATGTATGGAGTACTAAATGTAGACGAAATTAAAAACTAATTGCACAGTTTTGTTGTACTTTGCGAGACGAATCTTTTGAGCCTAATTAGTCAATATTTGGACAATAATTCACAAATACAAACGAAACGCTACAGTGTTGCTACAGTAATTTAGCACCTCCCAAATTCGCAAAGTAAACAAG	263
ba4595	DEL	Chr6	1026707	1027202	ATTACTGTAGTAAGACTCTGTTTGGATTCACCTAGTAAATTTTAGCTGGCTAAATTTAGCTATTATGGATCCAAACAGGACCCAGCTAAAGTTTAGCTAGCTAAATATTCTTTTAGCTGGTTAAATCCAGCTAAACTCAGCTAAATTGATAAAAGATCAAAGCGTTCCTGCACCTTCCTTGGGAAAAGTTTCTAAATTGGGATGGGGGTAGGATAGACAAAAATACCTCTTTAACTACTTATTTAGCTAGTGGATCCAAACACCTCTAGCTAAACTTTAGCCAGCTAAAAGAAAACTTCTAAAGTTTAACTAGCTAAATTTTAATTCTAACTATGGCGGCATGTAATTAATTTCCACAGAACGAAACTAACACGAGCAGGGACACACAGCATTATCACG…	340
ba4601	DEL	Chr6	1217499	1217825	TGCTAAACTTTAACAGTGTCACATCGGATGTTCGGATGCTAATTAGGAGGATTAAACATGAGCTAATTATAAAACTAATTGCAGAACCCTGTGCTAATTCGCGAGACGAATCTATTAAGCCTAATTAATCCATCATTAGCAAATGGTTACTGTAGCACCACATTGTCAAATCATGGACTAATTAGGCTTAATAGATTCGTCTCGCGAATTATACTCCATCTGTGCAATTAGTTTTGTAATTAGCTTATGTTTAGTACTCCTAATTAGCATCCAAACATCCGATGTGACAGGTGTTAAACTTTAACAGGTGTTTCCCAAACACCCCC	343
ba4605	DEL	Chr6	1336731	1336870	TAACCTTAACTGAATATAACATGAAGGCCACCATTATTCAGTGATTCCTGAACTAAGAGAGCTCTTGGGGCCTGTTGTTTTCTGATGGGCTAGTTTTTGGCCTGTTGTTACCAGATGAACTACAGTACAGGGATATGTT	160
ba4607	DEL	Chr6	1357589	1357982	TAATGGTTGGCATAATTGCAATACTTCTTGAAATTATTGTAAGGGGGTGTTTGGGAACACCCTATTAAAGTTTAACACCTGTCACATCGGATGTTTGGATGCTAATTAGGAGTAGTAAACATAAGCTAATTACAAAACTAATTGCACAGATGGAGTATAATTCGCGAGACGAATCTATTAAGCCTAATTAGTCCATGATTTGATAATGTGGTGCTACAGTAACCATTTGCTAATGATGGATTAATTAGGCTTAATAGATTCGTCTCGCGAATTAGCACAAGGTTCTGCAATTAGTTTTATAATTAGCTCATGTTTAATCCTTCTAATTAGCATCCGAACATCCGATGTGACACTGTTAAAGTTTAGCACCTCGTATCCAAACAGCCCCTAAGC	348
ba4612	DEL	Chr6	1401392	1401666	ACCAACCGGTACTAAATGGTTTTATGATCAAAATAATAAATAAAGATATTTTAAACTACAAGGAAGCCACAAGTCACTCGATTTTTCACACTAAAAATATGTGCATGTATGACGTGAGCCTTCCTTACCATCACATCTACACAGCACGTGTAATTGAGGAAGGGATGCTTTCCATTATGAAGTAGCTCACAGGACAGCCTTTAGTACCATGTGGTGTTAGCCTCAATGAGCGTTAGTACCGATGGTAACACTAACCAGCACTAAAAGGTGACTT	258
ba4618	DEL	Chr6	1492754	1493054	AGCATTGTTTTAATGAACTAACTTAAGGCCATGTTTAGTTACTCCCAAATTCCCAACTTTGGCACTATGCAAAAAGAAGATTATCTATCATATCAAACTTGCGGTACATGCATGGAATACTAAATGTAGACGAAATCAAAAACTAATTGCACAGTTTTGTTGTACTTTGCGAGACGAATCTTTTAAGCCTAATTAGTCAATATTTGGACAATATTTCACAAATACAAACAAAATGCTACAGTTGCGCATTTATGGCAAAATGCCAATTTTGCCACTCCCAAATTGGGAACTAAACAAAGC	272
ba4619	DEL	Chr6	1495527	1495870	GTATGACGGCCCCTCGAGCTTTGGCTTAAGAAGAAAGACCTTCTCACGCAGGCCTAGAAAACTCCCGAACCCCTACCCCACCCTTACATGGCGGCACCTACGCCCGCGTGAGCCTAGGCCGGGCCTTGCAGCATGCTTTGGTGTGGGATAGACGAGGAGGTTTTTTTTAACCCCAGCCTGAAATTCGCTCCCACGGGGAGTCGAACCCAGGAACTGAGGAGTGCCACTCGGTTCCACTAACCAACTCGGCTAGGGAACCCGTTTTTGTCGATGCAGAGTGATGGTGTCGTGGTCCTTGCCGATGGAGCGTTGGTGGGCAGCTCCTCTAGATCAGACGCCTTTT	186
ba4625	DEL	Chr6	1607547	1607722	GGAGATTGATTCTCTTATAAGCCGTCACCCAAAACTCTTGAGATAGTGAGATTGTTGCTGGCTGGTGCTCGTGGTTTTTCCCCTTCACATCGGAGGGGTTTTCCACGTTAAATCGTGTGTCTCCTCTGTGGTTTGATTTTTACTTCATATTCCTATACGTCGTTCATAACACATT	261
ba4642	DEL	Chr6	1707920	1708156	GATAACAATGTTGCATTCTCGTATGGCCACAGACAGTCATAACATTCACCTACACTATCTATTTAATAATGCTTGTTTCCTCTATTAATTTTAGATTTTTTTCCCCAAGTAAAAATATGTGCAAGTAAAATGTGCATCAATAAAATATAAGCACATCTATCATGATGATCGTGCTTGGATTGGCACGGCACGAAGTTGTACCGGCGTGCAGCACGGGCCATGCTTGTGCTTAGTAA	232
ba4643	DEL	Chr6	1710511	1711066	CAAATTCTTTCAAAGCTAACCATTCTCTTTTAATTGGCTCCTCCTCTCTATGCTCGATCTACATGGAATGATGGCACGAATGCTTGCTAGGTATTGGGCATTTTTAATTTTTTATTAACCATTTGCAGAGAGAACAAGCCGTCTCTACGAATGTACTTGCAGCGTCGGTCACTATCACCACCTCTGTAGTTGCTGGCATTTGCACAGGCCTTGGGCCTGTTCGCTTCAGCTTATAAGCCGGCTGAAAAGCTGAAATAGCTGATTTGTTGTGAGAGGAAAATACTGTTTGGTGGCTGATAAACCGGCTGAATAATCTAAAGCGAACATGCCGCTTATGTTAGAGGTGGTTCGTGAGGCTGCCTCAAATGTTTTGACCGACTTTAAGTTGGCTTCTTTGGT…	132
ba4656	DEL	Chr6	2162035	2162358	GAGGGAAAATGGATGAGAGGATTACGCGTCGCAGTATAGATTGGTTTAATCCGAGATCCGAGTAAACCATACCAAAACAGGCCTACGTCAACCTCGCTGACCAGCTATATGTAGTCTGTCCAACCTCGGCAACCAGCCGACGTGAACAGGGGCGGATCCAGAACGGGGCTGCGCCCCGGACTGAGCTGTTGAATCACACCTAAAATAGTCTAATTTTATCTCCTAAACCTCATTTTGTTAGGCCAAACAACACGTAGGTTAAAGGGACTCCATGGTCTCGTCCCGGACTGCAACCCGGGCAGCCCGAGCCCTGGATCCGCCCC	188
ba4659	DEL	Chr6	2190299	2190591	TCAAGCCCAATGAAGAAGTTACTGCAGGCGTGTTTGGCTCAGGGCTAAACTTTAGCCATGTGACATCGGATGTTTAGATACTAATTAGGAGTATTAAATATAATCTAATTATAAAACTAATTATATGATTGATTAATTAGGTTTAATAGATTCATCTCGCGAATTAACCTAGGGGTTCTGCAATTAATTTTATAATTAGCTCATGTTTAGTCTTGATTACTATTCGAATATTCGATGTGACAGGGCTAAAGTTTAGCCCCTGGTATCTAAACAACCCTCCATTGAACTCCTA	261
ba4660	DEL	Chr6	2254831	2255226	CCTACCACCGGGACCCGGCACACGGCAAACAAACCGGGTTTGCCGAGTGCCCAGTGGATGACACTCGGCAAAGGTCCGGTCTTTGCCGAGTGTTGGCACTCGGCAAAGAGCCGGTGTTTGCCGAGTGCCTCCCGTCTGGCACTCGGCAAACCTGCCGTTACCCCGACGCCGTCAGCGCGCATTTCGCTGAGTACATCTTTTCGCCGAGTGTTTTTTGGCCGTCGGCAAAATGTTTGCCGAGTGTTCGAGTTTTGACACTCGGCAAACTAGTCTTTGCCGACACAAAATTTGCCGTGTGCTCTTTGCCGAGTGTTACACTCGGCAAAGCCTTTGCCGAGTGTTTTTAGGCCTTTGCCGAGTGCCGGCAAAGCTTCTGTTTCCCGTAGGCCCTACCA	391
ba4669	DEL	Chr6	2275461	2275695	GGTAGTCCACGTGCCCCTTGATGTGGCTGCCACTGGGTAGGTTCAGGTCACTAGGATCCATTGTGGCCCGTGTGTCCACTTCCACCTGTGGTCCACGGTGTGGCCTGGAACCAGGCAGGGATTTCGAGTGCGCACGAGTTGTTTGATGAAATGCCGCAGAGGCATTCTGCGGCGGCGACGCTCGGCCGAGAGGCGGTTTGTTAGGCGGCCGGCGTCGCTCGACGGCGGCGAGGC	127
ba4670	DEL	Chr6	2302245	2302453	TTGCTGATGTAGGGTGGGAGAGACAAAGGCAGTTAATAAGGGCATGCCACGTGCATTCATGCAATAACGAAAATATCTTTGTAGTTTTTGTGTTGCAAACTCACAGCCTGTTCGCTTCAGCTTATAAGCCGGCTGAAAAGCTGAAACGGCTGATTTGATGTGAGAGGAAAATACTGTTTGGTAATAAGCTGAAGCGAACAGGGCGTCC	107
ba4672	DEL	Chr6	2321128	2321382	TTACTCCCAACTTCCAACTTTGACACTATGCAAAAAGAAGATTCCCCATCACATCAAACTTGCGGTACATGCATGGAGTACTAAATGTAGATGAAATTAAAAAGTAATTGCACAGTTTTGTTGTACTTTGCGAGACGAATCTTTTGAGCCTAATTAGTCAATATTTGGACAATAATTCACAAATACAAACGAAACGCTACAGTGTGCTACAGTGCTGTAACAGTAATTTGGCACCTCCCAAATTCGCCAACGCC	280
ba4674	DEL	Chr6	2376457	2376586	CGGTACACTCCTTATGGTAAAATATTACTTGACGTTTGTTATTTTTCACTACCTTTTTTCCTGAAAAAAATCACTATCTTCGAAGTATAAGCATGACTAGTGTTTTTATTATAATGCATTCATTAAAGT	131
ba4678	DEL	Chr6	2445556	2445790	TGTTGAATGAGCACACTTGCACTCTCAGTTAAGTTACTGCAATCACAAATTCTCTGAATTTTATCTCTTCCTCATATATCAAAGTGCTCTCTTGCGCCCAGATTATTTTGAAACCCATGTGTTTGGAAAGGCCGGCGGTCTGCATTCGCCCACACAGAGTTAAAAGCGATATCAGTAAAGTGCCATGTAAGACATTCTAACCATCATGTCCAGTCACGTAAATAAAAGATGTCC	220
ba4679	INS	Chr6	2469540	2469640	AACATAACTAGACAACTCTATATGCTGTAAAATTGCCATTGTTGCATGTAATTTGTTTTGAGGTTATGTTTGGACATGTATATACAAAATAAAATTGAGC	105
ba4666	DEL	Chr6	2506138	2506526	GGATACATACTTATAATTTTAGGACTTCACTTTTAGTCCACTTTTAGGACTTGTGCATCCAAACATATGTCATAAAAGTGCATTCATAATATTTAGGAGTGCTCTTTTCATTAGGAGGACCAAACCATCATAATAGGTCATGTTTCTCCTAAAAGTGGTCCCCAACCCATCATTTACCCCTCTTGCCCCTCCCCTTCTCTCTCCACGGCGCTAGAAACGGAGCAGGGATGGAGTAATTAGGGGTACAAAAGTCATTTCCCCTCTAACATCCTAAAGATTATGATTCCATCCAAACAGCCCACTCATAAATTTTAGGACTACCAATTTGTAGCTCCTAAACTTTATGAGTGTCCTAAAGTTTATGAGGGTGTATCCAAACAAACCCTAG	399
pD9180	DEL	Chr6	2507766	2507880	TAAGGCTCTTTAAGTATGTTTTTAGATATATAGGGCAATTGTTCTTCTCATAACTATTGTTCTCTCAATTGGCAAAGGTTTTTGTATTCTAATTTAAATTTTTTCAAGACTGAA	111
ba4700	DEL	Chr6	2631836	2632052	AGTTAACATCAGGGTCCGAGTCCCATGGTGTCTCCGGAACAAGGTTCCAAAATAGAGCATAATACAGACAAATCGAGAGGGAAAAAGCATATGGAAAAGCACACGAACTTTCTTTTTGTCACCAGAAAAAGCATATGTTTAGAAAGCATATTTTTCATGCTTCCTAAACATCGGTTGGCAGAGATGGCAACACTTGACAGAATTAGAAGGTATGAA	112
pD9203	DEL	Chr6	2638178	2638447	GGCCATGTTTAGTTCACTCCATAATTCCAACTTTGGCACTACGCAAAAGGAAGATTCCTCATCACATCAAACTTGCGGTACATGTATGGAGTACTGAATGTAGACGAAATCAAAAACTAATTGCACAGTTTTGTTGTACTTTGCGAGACGAATCTTTTGAGCCTAATTAGTCAATATTTGGACAATAATTCACAAATACAAACGAAACGCTACAGTGTTGCTACAGTAATTTTAACACCCCAAAGTTGGGCAACTAAACAAGGCCTCAA	268
ba4713	DEL	Chr6	2656724	2657214	TATCTGTGCTCAGAGTCGTGCAATGTGACCTGTGATGACACCAAATCTTTTTTTACTTGCATCCATTACTGGTAGTCTCTGATAAATTCATCTCAAGTCCTATACTGAACAATGAGGGGTTTGCGGAAGTCGTAAGTCACCACCGTAGTCTTGAAGTTTGCAGTTTGTAAATCTGATCTATGTACGATACAAGTGTAGTTTGGAGCACTTCAGGTGTGGCTTAACGGCCAGCACTCGGCTATAAAGTGCAGCAACATTGTATTTGCTGTTCTAGTGTGTAGTTCGGCCCAAAGCAGTGCTCTGTTTCCTGGGGGTGAGGCTGACTATTTACATGTGTAGTTTGGAGCAGTTCTGAGACAACACTAGACAAGTTAAACCCAAAATTTTGGAGCATGTTAC…	106
pD9211	DEL	Chr6	2666878	2667021	CAAGATTATTTACAGCAGTTGCTAGTAATGATACAACCTGCAGAATTAAAAATAATTTCGGTATCTTGACGTTATGAACATGCAAAAGATACAGACTGGAAAGGAACTCACATAATCTGATGTTGAAAGAAATGGGAGAAGAT	137
pD9219	DEL	Chr6	2699154	2699531	AGCCTAATTAGTCCATGATTTGACAATGTGGTGCTACAGTAACCATTTGCTAATGATGGATTAATTAGGCTTAATAGATTCGTCTCACGAATTAGCACAGGGTTCTGCAATTAGTTTTATAATTAGCTCATATTTAGTTCTTCTAATTAGCATCCGAACATCCGATGTGACACTGTTAAAGTTTAACACCTCGTATCCAAACACCCCCAGCAGTCATTTCATGCTCACATTACCTAAGTTAAAAGAAGAGAAAATAAGTTTTAAGTCGTGATCTTTTGGTGTTACAGAGTTAAGATTATGTTAGTTTAATCCCTATCATGACAACACCAATTGCATAAATGAAGATTAATTCGCGCGACGAATCTATTAAGCTTAGT	376
ba4716	DEL	Chr6	2703604	2703933	CATAAAATTTATGACATGTCACATCGGATGTTTAAATACTGATTAGAAGTATTAAATATAATCTAATTACGAAACTAATTACACAGATGGAGTCTAATTTGCGAGACGAATCTATTAAGCCTAATTAGTCCATAATTTGATAATGTGGTGCTACAGTAACCATTTGCTAATGATGGATTAATTAGACTTAATAGATTCGTCTCGAGAATTAGTATAGGGGTTCCGCAGTTAGTTTTATAATTAGCTTATGTTTAGTCCTCCTAATTAGCGTCCGAACATCCGATGTGACCCCTCCTAAAGTTTAGTACCTTGTATCCAAACACTCCCAA	358
ba4721	DEL	Chr6	2716895	2717200	TACATGCTACCTGTCACATCGGATGTTTGATACTAATTAGGAGTATTAAATATAGTCTAATTATAAAACTAATTACACAGATGGAGTCTAATTCGCGAGACGAATCTATTAAGTCTAATTAGTCCATGATTTGATAATGTGGTGCTACAGTAACTATTTGCTAATGATGGATTAATTAGGCTTAATAGATTCGTCTCGCGAATTAGTATAGGGGTTTTGCAGTTAGTTTTATAATTAGCTCATGTTTAGTCCTCCTAATTAGCGTGACCCCTCCTAAAGTTTAGTATCCCGCATCCAAAACTCCC	322
ba4723	DEL	Chr6	2759898	2760084	CTCCTGTAACTAAAGCACTTGCGATCTCTTATTTTATTTTTCTTTTGCTCGACTAACGATTCTTTTTCACATGAGCAACGCACAGATTCCTGATGATTGCAATTGCACCATGAGATAGGGCCTGGTATCAGCCCGCGCACCGCTACCATGAGACGTTCACGTTCCGGCGCCAATCTGGAGCTATTC	217
ba4726	DEL	Chr6	2827064	2827244	AAAATTGATTTATTCCCCTTCTGCTTGTTTACACATGCAGATAAGTATTGATATTGACAGACCACATCAAGCTTGAGGTTTGGAGCATCTGAAAAACTTGAGAGATCAGTTCATATGCACCTAGGGGTATTACTGAACAATTGGAACTTGGGACAGACCACATCAAGCTTGAGGTTTGGA	100
ba4727	DEL	Chr6	2855458	2855806	TCAAGGAGGTGTTTGGGAACACCCTGTTAAAGTTTAACACCTGTCACATCGTATGTTTGGATACTAATTAGGAGTATTAAACGTAGGCTAATTACAAAACTAATTGCACGGATGGAGTATAATTCGCAAGACGAATCTATTAAGCCTAATTAGTCCATGATTTGACAATGTGGTGCTACAGTAACCATTTGCTAATGATGGATTAATTAGGCTTAATAGATTCGTCTCGCGAATTAGCACAGGATTCTGCAATTAGTTTTATAATTAGCTCATATTTAGTCCTCCTAATTAGCATCCGAACATCCGATGTGACACTGTTAAAGTTTAGCACCTCGTATCCAAACACCC	343
ba4734	DEL	Chr6	2925644	2926041	TAGTGGGGCTGTGATTAATCATGTTTAACAAAACAATAATCTATATAATGCTGATCAAGTCAATTTTAAATATAAATCATATGAACATTAATGATTTCTTGGCTTATTCATATGCAGTTCACTACACTTGTTTCTTTTTATGTTCTTGGATGTGTGATTACTTGAACGCAGCATACGCATTTATAATTCTCAAGTCTCCGATACTGCATAGTCCTGATAATCGAACTCCTCAAAATCCTAAACCAGGATCAGCGTTGCCGGCCTTAAATTCGTTTTTTTAATGGAAATAATTTGACCTTTACGACTGCACACAGCCATCAACGGCCTTAAATTCTTGACATCATTTAACGTCCGCCACAGGCGCTGGCAGCGGCAACTTCTCGTGTCCACCTCATCG	400
ba4755	DEL	Chr6	3176642	3176820	GTGACAAAATGATTCCCATCGCATATGCGATGTATAGTCACTGGCCTTAGTGTGTGCATGCACAAAGCAACAGGGCGACACGATAGTGATAGAATAGTACTAACATGCATGCGCTGTGGTGGTGTTGAACTGAGCTGTTTTTTATTGGGCTGACGCGTAGTGGCCCATCCAAACTCTT	147
ba4757	DEL	Chr6	3196840	3197028	TTCCGGGCCAGCTGAAAAGAGTACCGGGGAGGAAAGCGTTGCCGAAGAGGCGAAGTGCGGAGAACAGCAGAAAAAGGTCGTCGTTGCTATCATCACTTTATTAAGTGCGGAGAACAGCGGGGTTGATTATATACTTGGTGCCATGAAGGTCGTCGTTGCTATCATCACTTTATTAGAAAATAATTATT	146
ba4759	DEL	Chr6	3219239	3219413	GAGCCGTGGAGCCACTTTTTTGAGCTCCTTCATGCAGGCCTAAAACGGCTCCGGCTCCTCCCAAATGTGCCAAAAAATGGCTCCGCGGTCAATGCCGTTTGGTGCGGCTCCGGCTCCTTCGTGCTTCGGTAAGCGCACGGAGCCGGAGTCGGAGCCCTGCCAAACTGGCCCTTA	231
ba4768	DEL	Chr6	3256135	3256356	TTGCACATTCATGTACCACTCCCTGGGTTCGAGTTTTCCCTTGCAATTATGCCCTCGTTGCTTCTTTTTGGGCCACTTATTCACGCTGCAGTCCCCAGATGCGACTTTAACCTTGCAGATATGCCCCTAACTGTTCGTTGTAGGCCCTTTTTACAACGTAGCAGCTGTACACTCCCTATCCAAAATCTATCTAGGCCTCTAGTTTTTTTTTTCTGAACCGT	114
ba4769	DEL	Chr6	3258852	3259193	TTGGATCATTGGAATTGAATTCCATCCTAATAATCATAATTTAGACACAAATTAATTAAGCTAATATAATTGTATGTGGAATATAGTTGTATATTATAGTTGGTGATATGGGAGAGATACTTGTATGCTGCACTTCTACCATAGAGAAGCGAGTCTAAGAGCGTGCTATAAGAATTGAATTCCATTCTAATAACCATAATCTATAGAATCAATTTCCATCTCCCACCCCATGAATTTAAGATAGGCTTATATCTAAACTTTGGAAAGTTATGGAATGCCACATTCCAACATAAATTAGCCTACTCCATTAAATAGATTCCAATTCCTTGGACCCAAACGGG	354
ba4770	DEL	Chr6	3262131	3262406	CTTGTTTACTTCCCTCCAAACTCCCAACTTTGACACTATGCAAAAAGAAGATTCCCCATCACATCAAACTTGCGGTACATGCATGGAGTACTAAATGTAGACGAAATTAAAAACTAATTGCACAGTTTTGTTGTACTTTGCGAGACGAATCTTTTGAGCCTAATTAGTCAATATTTGGACAATAATTCACAAATACAAACGAAACGCTACAGTGTCGCATTTATGGCAAAATGCCAATTTGGCACCTCCCAACTTGGGAAGTAAACAAGGGCCGG	289
ba4771	DEL	Chr6	3263940	3264077	GTTAGCGAAATGGCAGCCAATAGAACACCAGAGAATCCGAGCTGGACTTATGAGCCAGTTGAAAAATTGAAACGATTGATTTATTATAAGAGAAAAACACAGTTCGGTGGCTGATAAGATGAAGCGAACAGGCTGTC	106
ba4773	DEL	Chr6	3429756	3429875	CACATCCCATACATCATCAACTACAACAAGGTACCTACAGTAGTACATGATTTTAACAATATCAATGAAAATGCTGCAAGCTAAAGTGCATCACAAACTATCATCTCTATGCCCCTGAG	100
ba4783	DEL	Chr6	3542700	3542956	CACTGCACTCGAAAATTCCAGCCTCGGAGAGTCAAACCGCCAGAAAATTCGCAGCAAAAGCAGGACGGGTTCGTCCGGCCAGTTGCCAGATATCCCGAATTCGAAGAGAAGCGAATTCAAATTTGCTCGGACAAACGGAACAAACAGCTCCCGCTCGCCCGGGAGGACCAGACCAAACCCCAAAAGGCAAATAGGCAAATCCAAATGGGGGTTGGGTGGGCCCAACGGAAGCGAGGGAGCAAGCAAGCTAAGCGAG	125
[truncated: 904 more rows]
